# Supplementary material for: Medications that reduce emergency hospital admissions: an overview of systematic reviews and prioritisation of treatments
Source: PubMed Central journal article supplement (PMC6060538; doi:10.1186/s12916-018-1104-9), 2018-07-26
Supplement: 12916_2018_1104_MOESM1_ESM.pdf [file 12916_2018_1104_MOESM1_ESM.pdf]

## Chapter 3 Appendix

### Contents

|                                                                  |     |
|------------------------------------------------------------------|-----|
| Table S1. Search strategies and results of searches.....         | 2   |
| Table S2. Formulae and calculations used in analyses .....       | 4   |
| Table S3. Complete references .....                              | 5   |
| Table S4. Information about included reviews .....               | 11  |
| Table S5. Full Results for AMSTAR Review Quality Assessment..... | 33  |
| Table S6. Distribution of evidence by patient population .....   | 37  |
| Table S7. GRADED estimates showing reductions in admissions..... | 42  |
| Table S8. Trial information underpinning GRADED estimates.....   | 52  |
| Table S9. Details of GRADE ratings .....                         | 112 |
| Table S9 cont. Inconsistency: domain 2 for downgrading .....     | 118 |
| Table S9 cont. Indirectness: domain 3 for downgrading. ....      | 121 |
| Table S9 cont. Imprecision: domain 4 for downgrading .....       | 125 |
| Table S9 cont. Publication bias: domain 5 for downgrading .....  | 128 |
| Table S10. GRADED estimates showing an increase in admissions    | 131 |

**Table S1. Search strategies and results of searches**

| <b>Electronic databases with peer-reviewed literature</b>                                                                                                                                                                                                                                                                                                                                                                                                                                                                                                                                                     |                                                                                                                                                                                                                                                                                                |
|---------------------------------------------------------------------------------------------------------------------------------------------------------------------------------------------------------------------------------------------------------------------------------------------------------------------------------------------------------------------------------------------------------------------------------------------------------------------------------------------------------------------------------------------------------------------------------------------------------------|------------------------------------------------------------------------------------------------------------------------------------------------------------------------------------------------------------------------------------------------------------------------------------------------|
| <b>MEDLINE</b>                                                                                                                                                                                                                                                                                                                                                                                                                                                                                                                                                                                                |                                                                                                                                                                                                                                                                                                |
| Inception to February 29, 2016 for medication reviews                                                                                                                                                                                                                                                                                                                                                                                                                                                                                                                                                         |                                                                                                                                                                                                                                                                                                |
| 1                                                                                                                                                                                                                                                                                                                                                                                                                                                                                                                                                                                                             | Hospitalization/                                                                                                                                                                                                                                                                               |
| 2                                                                                                                                                                                                                                                                                                                                                                                                                                                                                                                                                                                                             | Patient admission/                                                                                                                                                                                                                                                                             |
| 3                                                                                                                                                                                                                                                                                                                                                                                                                                                                                                                                                                                                             | Patient readmission/                                                                                                                                                                                                                                                                           |
| 4                                                                                                                                                                                                                                                                                                                                                                                                                                                                                                                                                                                                             | (admission? or admitted or readmission? or re-admission? or readmitted or re-admitted or hospitali* or rehospitali* or re-hospitali*).ti,ab.                                                                                                                                                   |
| 5                                                                                                                                                                                                                                                                                                                                                                                                                                                                                                                                                                                                             | 1 or 2 or 3 or 4                                                                                                                                                                                                                                                                               |
| 6                                                                                                                                                                                                                                                                                                                                                                                                                                                                                                                                                                                                             | Cochrane database of systematic reviews.jn. or search.tw. or meta-analysis.pt. or Medline.tw. or systematic review.tw.                                                                                                                                                                         |
| 7                                                                                                                                                                                                                                                                                                                                                                                                                                                                                                                                                                                                             | 5 and 6                                                                                                                                                                                                                                                                                        |
| <b>Cochrane Database of Systematic Reviews</b>                                                                                                                                                                                                                                                                                                                                                                                                                                                                                                                                                                |                                                                                                                                                                                                                                                                                                |
| Inception to February 29, 2016 for medication reviews                                                                                                                                                                                                                                                                                                                                                                                                                                                                                                                                                         |                                                                                                                                                                                                                                                                                                |
| 1                                                                                                                                                                                                                                                                                                                                                                                                                                                                                                                                                                                                             | MeSH: Hospitalization                                                                                                                                                                                                                                                                          |
| 2                                                                                                                                                                                                                                                                                                                                                                                                                                                                                                                                                                                                             | MeSH: Patient Admission                                                                                                                                                                                                                                                                        |
| 3                                                                                                                                                                                                                                                                                                                                                                                                                                                                                                                                                                                                             | (admission or admitted or readmission or re-admission or readmitted or re-admitted or hospitali* or rehospitali* or re-hospitali*):ti,ab                                                                                                                                                       |
| 4                                                                                                                                                                                                                                                                                                                                                                                                                                                                                                                                                                                                             | (#1 OR #2 OR #3)                                                                                                                                                                                                                                                                               |
| <b>Database of Abstracts of Reviews of Effects</b>                                                                                                                                                                                                                                                                                                                                                                                                                                                                                                                                                            |                                                                                                                                                                                                                                                                                                |
| Inception to February 29, 2016 for medication reviews                                                                                                                                                                                                                                                                                                                                                                                                                                                                                                                                                         |                                                                                                                                                                                                                                                                                                |
| 1                                                                                                                                                                                                                                                                                                                                                                                                                                                                                                                                                                                                             | MeSH: Hospitalization                                                                                                                                                                                                                                                                          |
| 2                                                                                                                                                                                                                                                                                                                                                                                                                                                                                                                                                                                                             | MeSH: Patient Admission                                                                                                                                                                                                                                                                        |
| 3                                                                                                                                                                                                                                                                                                                                                                                                                                                                                                                                                                                                             | (admission or admitted or readmission or re-admission or readmitted or re-admitted or hospitali* or rehospitali* or re-hospitali*):ti,ab                                                                                                                                                       |
| 4                                                                                                                                                                                                                                                                                                                                                                                                                                                                                                                                                                                                             | (#1 OR #2 OR #3)                                                                                                                                                                                                                                                                               |
| <b>PubMed</b>                                                                                                                                                                                                                                                                                                                                                                                                                                                                                                                                                                                                 |                                                                                                                                                                                                                                                                                                |
| January 1, 2014 to July 1, 2014 AND August 29, 2015 to February 29, 2016 for medication reviews                                                                                                                                                                                                                                                                                                                                                                                                                                                                                                               |                                                                                                                                                                                                                                                                                                |
| 1                                                                                                                                                                                                                                                                                                                                                                                                                                                                                                                                                                                                             | ((((((admission[Title/Abstract]) OR admitted[Title/Abstract]) OR readmission[Title/Abstract]) OR re-admission[Title/Abstract]) OR readmitted[Title/Abstract]) OR re-admitted[Title/Abstract]) OR hospitali*[Title/Abstract]) OR rehospitali*[Title/Abstract]) OR re-hospitali*[Title/Abstract] |
| 2                                                                                                                                                                                                                                                                                                                                                                                                                                                                                                                                                                                                             | Date limited to six months before search date (to capture articles not yet indexed in MEDLINE)                                                                                                                                                                                                 |
| 3                                                                                                                                                                                                                                                                                                                                                                                                                                                                                                                                                                                                             | Limited using built in Systematic Reviews                                                                                                                                                                                                                                                      |
| <b>Grey literature</b>                                                                                                                                                                                                                                                                                                                                                                                                                                                                                                                                                                                        |                                                                                                                                                                                                                                                                                                |
| <b>Google scholar</b> targeted search                                                                                                                                                                                                                                                                                                                                                                                                                                                                                                                                                                         |                                                                                                                                                                                                                                                                                                |
| Inception to April 28, 2016 for medication reviews                                                                                                                                                                                                                                                                                                                                                                                                                                                                                                                                                            |                                                                                                                                                                                                                                                                                                |
| 1                                                                                                                                                                                                                                                                                                                                                                                                                                                                                                                                                                                                             | ((((hospital* OR (hospital AND admi*) OR (readmi*) OR (re-admi*)) AND ((systematic review) OR (literature review) OR ((meta) AND (analy*))) AND ((random*) OR (trial) OR (RCT))))                                                                                                              |
| 2                                                                                                                                                                                                                                                                                                                                                                                                                                                                                                                                                                                                             | Sorted by relevance                                                                                                                                                                                                                                                                            |
| <b>Google scholar</b> broad search                                                                                                                                                                                                                                                                                                                                                                                                                                                                                                                                                                            |                                                                                                                                                                                                                                                                                                |
| Inception to April 28, 2016 for medication reviews                                                                                                                                                                                                                                                                                                                                                                                                                                                                                                                                                            |                                                                                                                                                                                                                                                                                                |
| 1                                                                                                                                                                                                                                                                                                                                                                                                                                                                                                                                                                                                             | Hospital admissions AND interventions AND systematic review                                                                                                                                                                                                                                    |
| 2                                                                                                                                                                                                                                                                                                                                                                                                                                                                                                                                                                                                             | Sorted by relevance                                                                                                                                                                                                                                                                            |
| <b>National Institutes of Health Research Website</b>                                                                                                                                                                                                                                                                                                                                                                                                                                                                                                                                                         |                                                                                                                                                                                                                                                                                                |
| <a href="https://www.journalslibrary.nih.ac.uk/programmes/">https://www.journalslibrary.nih.ac.uk/programmes/</a>                                                                                                                                                                                                                                                                                                                                                                                                                                                                                             |                                                                                                                                                                                                                                                                                                |
| Journals library; ongoing research; programme studies, all statuses; health technology assessment programmes                                                                                                                                                                                                                                                                                                                                                                                                                                                                                                  |                                                                                                                                                                                                                                                                                                |
| Inception to April 28, 2016 for medication reviews                                                                                                                                                                                                                                                                                                                                                                                                                                                                                                                                                            |                                                                                                                                                                                                                                                                                                |
| 1                                                                                                                                                                                                                                                                                                                                                                                                                                                                                                                                                                                                             | hospital admissions                                                                                                                                                                                                                                                                            |
| <b>Research Council United Kingdom Website</b> (seven major funding agencies)                                                                                                                                                                                                                                                                                                                                                                                                                                                                                                                                 |                                                                                                                                                                                                                                                                                                |
| <a href="http://gtr.rcuk.ac.uk/search/publication?term=admission+AND+systematic+review&amp;fetchSize=25&amp;selectedSortableField=score&amp;selectedSortOrder=DESC&amp;fields=per.on%2Cper.fn%2Cpub.a%2Cper.sn%2Cper.org.n%2Cpub.t%2Cper.pro.abs%2Cper.pro.t%2Cper.fnsn%2Cpro.t%2Corg.n%2Cpro.gr%2Cpro.a">http://gtr.rcuk.ac.uk/search/publication?term=admission+AND+systematic+review&amp;fetchSize=25&amp;selectedSortableField=score&amp;selectedSortOrder=DESC&amp;fields=per.on%2Cper.fn%2Cpub.a%2Cper.sn%2Cper.org.n%2Cpub.t%2Cper.pro.abs%2Cper.pro.t%2Cper.fnsn%2Cpro.t%2Corg.n%2Cpro.gr%2Cpro.a</a> |                                                                                                                                                                                                                                                                                                |

|                                                                                                               |                                                                                                                                                                                                                                                                                             |
|---------------------------------------------------------------------------------------------------------------|---------------------------------------------------------------------------------------------------------------------------------------------------------------------------------------------------------------------------------------------------------------------------------------------|
| Inception to April 28, 2016 for medication reviews                                                            |                                                                                                                                                                                                                                                                                             |
| 1                                                                                                             | Hospital admissions (journal article/review)                                                                                                                                                                                                                                                |
| 1                                                                                                             | Admission AND systematic review                                                                                                                                                                                                                                                             |
| 1                                                                                                             | Admission AND review                                                                                                                                                                                                                                                                        |
| <b>King's Fund Website</b> <a href="http://kingsfund.koha-ptfs.eu">http://kingsfund.koha-ptfs.eu</a>          |                                                                                                                                                                                                                                                                                             |
| Inception to April 28, 2016 for medication reviews                                                            |                                                                                                                                                                                                                                                                                             |
| 1                                                                                                             | Unplanned hospital admissions                                                                                                                                                                                                                                                               |
| 2                                                                                                             | Unscheduled hospital admissions                                                                                                                                                                                                                                                             |
| 3                                                                                                             | Emergency hospital admissions                                                                                                                                                                                                                                                               |
| 4                                                                                                             | 1 OR 2 OR 3                                                                                                                                                                                                                                                                                 |
| 5                                                                                                             | Review                                                                                                                                                                                                                                                                                      |
| 6                                                                                                             | 4 AND 5                                                                                                                                                                                                                                                                                     |
| <b>Nuffield Trust Website</b> <a href="http://www.nuffieldtrust.org.uk/">http://www.nuffieldtrust.org.uk/</a> |                                                                                                                                                                                                                                                                                             |
| Inception to April 28, 2016 for medication reviews                                                            |                                                                                                                                                                                                                                                                                             |
| 1                                                                                                             | Admissions                                                                                                                                                                                                                                                                                  |
| 1                                                                                                             | Emergency                                                                                                                                                                                                                                                                                   |
| 1                                                                                                             | Unplanned                                                                                                                                                                                                                                                                                   |
| 1                                                                                                             | Unscheduled                                                                                                                                                                                                                                                                                 |
| 1                                                                                                             | Hospitalised                                                                                                                                                                                                                                                                                |
| 1                                                                                                             | Hospitalisation                                                                                                                                                                                                                                                                             |
| <b>Other sources</b>                                                                                          |                                                                                                                                                                                                                                                                                             |
| <b>Experts</b>                                                                                                |                                                                                                                                                                                                                                                                                             |
| June 2014 to April 28, 2016 for medication reviews                                                            |                                                                                                                                                                                                                                                                                             |
| 1                                                                                                             | Approached researchers that presented on unscheduled hospital admissions at a King's fund conference, Evidence Live 2015 conference, and the 2015 Society for Academic Primary Care Conference. I described the research and asked the researchers to identify relevant systematic reviews. |
| <b>Reference lists of included reviews</b>                                                                    |                                                                                                                                                                                                                                                                                             |
| 1                                                                                                             | All included systematic reviews were assessed.                                                                                                                                                                                                                                              |

**Table S2. Formulae and calculations used in analyses**

| Desired conversion                                                                                                                                                                                                                            | Formula                                                                                                                                                                 |                                                                                                                                                                  | Source                                              |
|-----------------------------------------------------------------------------------------------------------------------------------------------------------------------------------------------------------------------------------------------|-------------------------------------------------------------------------------------------------------------------------------------------------------------------------|------------------------------------------------------------------------------------------------------------------------------------------------------------------|-----------------------------------------------------|
| Calculating the risk ratio from the odds ratio                                                                                                                                                                                                | $RR = \frac{OR}{(1 - CER) + (CER \times OR)}$                                                                                                                           |                                                                                                                                                                  | Zhang et al. <sup>1</sup>                           |
| Calculating the corresponding intervention group event rate per 100 from the median control group event rate from risk ratios, rate ratios, hazard ratios, odds ratios, number needed to treat, absolute difference, and mean risk difference | <i>Corresponding intervention group risk = 100 × median CER × RR</i>                                                                                                    |                                                                                                                                                                  | The Cochrane Collaboration <sup>2</sup>             |
|                                                                                                                                                                                                                                               | <i>Corresponding intervention group risk = 100 × median CER × rate ratio</i>                                                                                            |                                                                                                                                                                  |                                                     |
|                                                                                                                                                                                                                                               | <i>Corresponding intervention group risk = 100 × median CER × HR</i><br>*At the end of follow-up or last time point                                                     |                                                                                                                                                                  |                                                     |
|                                                                                                                                                                                                                                               | $\text{Corresponding intervention group risk} = \frac{OR \times CER}{(1 - CER) + (OR \times CER)}$                                                                      |                                                                                                                                                                  | Derived                                             |
|                                                                                                                                                                                                                                               | $\text{Corresponding intervention group risk} = \left( \frac{\text{Median CER}}{\text{per 100 patients}} - \frac{NNT}{\text{per 100 patients}} \right)$                 |                                                                                                                                                                  |                                                     |
|                                                                                                                                                                                                                                               | <i>Corresponding intervention group risk = 100 × (CER + Difference in risk)</i><br><i>Corresponding intervention group risk = 100 × (CER + Mean difference in risk)</i> |                                                                                                                                                                  |                                                     |
| Calculating the number needed to treat from an odds ratio                                                                                                                                                                                     | $NNT = ((1 - (CER \times (1 - OR))) / ((1 - CER) \times (CER) \times (1 - OR)))$                                                                                        |                                                                                                                                                                  | The Centre for Evidence-Based Medicine <sup>3</sup> |
| Calculating the number needed to harm from an odds ratio                                                                                                                                                                                      | $NNH = ((CER \times (OR - 1)) + 1) / (CER \times (OR - 1) \times (1 - CER))$                                                                                            |                                                                                                                                                                  |                                                     |
| Calculating the number needed to treat from a hazard ratio                                                                                                                                                                                    | $NNT = \frac{1}{((1 - CER(t))^{HR}) - (1 - CER(t))}$                                                                                                                    | *Note: Where t is the time point of interest                                                                                                                     | Derived from Altman et al. <sup>4</sup>             |
| Calculating the number needed to harm from a hazard ratio                                                                                                                                                                                     | $NNH = \frac{1}{((1 - CER(t))^{HR}) - (1 - CER(t))} \times -1$                                                                                                          | *Note: To be used when the hazard ratio >1 indicating an increase in hospital admissions associated with the intervention; Where t is the time point of interest |                                                     |
| Calculating the absolute risk difference from the risk ratio                                                                                                                                                                                  | $\text{Absolute risk difference} =  CER \times (RR - 1) $                                                                                                               |                                                                                                                                                                  | Newcombe et al. <sup>5</sup>                        |
| Standardising follow-up times to months                                                                                                                                                                                                       | 30.4 days per month and 4.3 weeks per month.                                                                                                                            |                                                                                                                                                                  |                                                     |
| Number needed to treat from absolute risk difference                                                                                                                                                                                          | $NNT = \frac{1}{\text{Absolute risk difference}}$                                                                                                                       |                                                                                                                                                                  | The Centre for Evidence-Based Medicine <sup>7</sup> |

Abbreviations: RR= risk ratio; OR= odds ratio; CER= control event rate; NNT= Number needed to treat; NNH= Number needed to harm; HR= Hazard ratio; t=time point of interest

<sup>1</sup>Zhang J, Yu KF. What's the relative risk? A method of correcting the odds ratio in cohort studies of common outcomes. *JAMA*. 1998;280(19):1690-1691. doi:10.1001/jama.280.19.1690.

<sup>2</sup>The Cochrane Collaboration. Chapter 11.5.5 Statistical considerations in "Summary of findings" tables. *Cochrane Handbook for Systematic Reviews of Interventions*. 2011. www.cochrane-handbook.org

<sup>3</sup>The Centre for Evidence-Based Medicine. Number Needed to Treat (NNT). <http://www.cebm.net/number-needed-to-treat-nnt/>. Published 2012. Accessed June 1, 2014.

<sup>4</sup>Altman DG, Andersen PK. Calculating the number needed to treat for trials where the outcome is time to an event. *Bmj*. 1999;319(7223):1492-1495. doi:10.1136/bmj.319.7223.1492.

<sup>5</sup>Newcombe RG, Bender R. Implementing GRADE: calculating the risk difference from the baseline risk and the relative risk. *Evid Based Med*. 2014;19(1):6-8. doi:10.1136/eb-2013-101340.

## Table S3. Complete references

| Author, Year, Review ID  | Reference                                                                                                                                                                                                                                                                                                                                                                                                                                                                                                                                                                                          |
|--------------------------|----------------------------------------------------------------------------------------------------------------------------------------------------------------------------------------------------------------------------------------------------------------------------------------------------------------------------------------------------------------------------------------------------------------------------------------------------------------------------------------------------------------------------------------------------------------------------------------------------|
| Afilalo, 2007, 100       | Afilalo J, Majdan AA, Eisenberg MJ. Intensive statin therapy in acute coronary syndromes and stable coronary heart disease: a comparative meta-analysis of randomised controlled trials. <i>Heart</i> . 2007;93(8):914-921. doi:10.1136/hrt.2006.112508.                                                                                                                                                                                                                                                                                                                                           |
| Ahmed, 2014, 129         | Ahmed F, Lindley MC, Allred N, Weinbaum CM, Grohskopf L. Effect of influenza vaccination of healthcare personnel on morbidity and mortality among patients: Systematic review and grading of evidence. <i>Clin Infect Dis</i> . 2014;58(1):50-57. doi:10.1093/cid/cit580.                                                                                                                                                                                                                                                                                                                          |
| Akiyamen, 2016, 8711     | Akiyamen L, Levine M, Sherifali D, et al. Cardiovascular and cerebrovascular outcomes of long-term angiotensin receptor blockade: Meta-analyses of trials in essential hypertension. <i>J Am Soc Hypertens</i> . 2016;10(1):55-69. doi:10.1016/j.jash.2015.11.005.                                                                                                                                                                                                                                                                                                                                 |
| Anderson, 2015, 8714     | Anderson D, Kew K, Boyter A. Long-acting muscarinic antagonists (LAMA) added to inhaled corticosteroids (ICS) versus the same dose of ICS alone for adults with asthma. <i>Cochrane Database Syst Rev</i> . 2015;(8). doi:10.1002/14651858.CD011397.pub2.                                                                                                                                                                                                                                                                                                                                          |
| Assasi, 2009, 378        | Assasi N, Blackhouse G, Xie F, et al. Anti-TNF- $\alpha$ Drugs for Refractory Inflammatory Bowel Disease: Clinical- and Cost-Effectiveness Analyses [Technology Report Number 120]. Ottawa; 2009.                                                                                                                                                                                                                                                                                                                                                                                                  |
| Badve, 2011, 446         | Badve S V., Roberts MA, Hawley CM, et al. Effects of beta-adrenergic antagonists in patients with chronic kidney disease: A systematic review and meta-analysis. <i>J Am Coll Cardiol</i> . 2011;58(11):1152-1161. doi:10.1016/j.jacc.2011.04.041.                                                                                                                                                                                                                                                                                                                                                 |
| Baigent, 2013, 1653      | Baigent C, Bhalra N, Emberson J, et al. Vascular and upper gastrointestinal effects of non-steroidal anti-inflammatory drugs: Meta-analyses of individual participant data from randomised trials. <i>Lancet</i> . 2013;382(9894):769-779. doi:10.1016/S0140-6736(13)60900-9.                                                                                                                                                                                                                                                                                                                      |
| Barr, 2006, 548          | Barr RG, Bourbeau J, Camargo C a, Ram FS. Tiotropium for stable chronic obstructive pulmonary disease. <i>Cochrane Database Syst Rev</i> . 2005;(2):Cd002876. doi:10.1002/14651858.CD002876.pub2.                                                                                                                                                                                                                                                                                                                                                                                                  |
| Baumeister, 2011, 593    | Baumeister H, Hutter N, Bengel J. Psychological and pharmacological interventions for depression in patients with coronary artery disease. <i>Cochrane Database Syst Rev</i> . 2011;(9). <a href="http://www.mrw.interscience.wiley.com/cochrane/clsystrev/articles/CD008012/pdf_fs.html%5Chttp://ovidsp.ovid.com/ovidweb.cgi?T=JS&amp;PAGE=reference&amp;D=emed9&amp;NEWS=N&amp;AN=2010193126">http://www.mrw.interscience.wiley.com/cochrane/clsystrev/articles/CD008012/pdf_fs.html%5Chttp://ovidsp.ovid.com/ovidweb.cgi?T=JS&amp;PAGE=reference&amp;D=emed9&amp;NEWS=N&amp;AN=2010193126</a> . |
| Beck, 2013, 615          | Beck AM, Holst M, Rasmussen HH. Oral nutritional support of older (65 years+) medical and surgical patients after discharge from hospital: Systematic review and meta-analysis of randomized controlled trials. <i>Cochrane Database Syst Rev</i> . 2013;27:19-27. doi:10.1177/0269215512445396.                                                                                                                                                                                                                                                                                                   |
| Blitz, 2005, 813         | Blitz M. Aerosolized Magnesium Sulfate for Acute Asthma. <i>CHEST J</i> . 2005;128(1):337. doi:10.1378/chest.128.1.337.                                                                                                                                                                                                                                                                                                                                                                                                                                                                            |
| Bonsu, 2016, 8729        | Bonsu KO, Reidpath DD, Kadirvelu A. Lipophilic Statin Versus Rosuvastatin (Hydrophilic) Treatment for Heart Failure: a Meta-Analysis and Adjusted Indirect Comparison of Randomised Trials. <i>Cardiovasc Drugs Ther</i> . 2016;30(2):177-188. doi:10.1007/s10557-015-6636-z.                                                                                                                                                                                                                                                                                                                      |
| Briasoulis, 2015, 8731   | Briasoulis A, Palla M, Afonso L. Meta-Analysis of the Effects of Carvedilol Versus Metoprolol on All-Cause Mortality and Hospitalizations in Patients With Heart Failure. <i>Am J Cardiol</i> . 2015;115(8):1111-1115. doi:10.1016/j.amjcard.2015.01.545.                                                                                                                                                                                                                                                                                                                                          |
| Brophy, 2001, 1021       | Brophy J, Joseph L, Rouleau J. B-Blockers in Congestive Heart Failure. <i>Ann Intern Med</i> . 2001.                                                                                                                                                                                                                                                                                                                                                                                                                                                                                               |
| Burch, 2009, 1080        | Burch J, Paulden M, Conti S, et al. Antiviral drugs for the treatment of influenza: a systematic review and economic evaluation. <i>Health Technol Assess</i> . 2009;13(58):1-265, iii-iv. doi:10.3310/hta13580.                                                                                                                                                                                                                                                                                                                                                                                   |
| Cammarano, 2016, 8735    | Cammarano C, Silva M, Comee M, Donovan JL, Malloy MJ. Meta-analysis of Ivabradine in Patients with Stable Coronary Artery Disease with and Without Left Ventricular Dysfunction. <i>Clin Ther</i> . 2016;38(2):387-395. doi:10.1016/j.clinthera.2015.12.018.                                                                                                                                                                                                                                                                                                                                       |
| Campschroer, 2014, 1164  | Campschroer T, Zhu Y, Duijvesz D, Grobbee DE, Lock MTWT. Alpha-blockers as medical expulsive therapy for ureteral stones. <i>Cochrane database Syst Rev</i> . 2014;4(4):CD008509. doi:10.1002/14651858.CD008509.pub2.                                                                                                                                                                                                                                                                                                                                                                              |
| Cates, 2013, 1249        | Cates CJ, Rowe BH, Bara A. Holding chambers versus nebulisers für beta-agonist treatment of acute asthma (Cochrane Review). <i>Cochrane database Syst Rev (Online Updat Software)</i> . 2013;(3):3-6. doi:10.1002/14651858.CD000052.pub3.Copyright.                                                                                                                                                                                                                                                                                                                                                |
| Cawood, 2012, 1264       | Cawood AL, Elia M, Stratton RJ. Systematic review and meta-analysis of the effects of high protein oral nutritional supplements. <i>Ageing Res Rev</i> . 2012;11(2):278-296. doi:10.1016/j.arr.2011.12.008.                                                                                                                                                                                                                                                                                                                                                                                        |
| Ceron-Litvoc, 2009, 1281 | Ceron-Litvoc D, Soares B, Geddes J, Litvoc J, Silva de Lima M. Comparison of carbamazepine and lithium in treatment of bipolar disorder: a systematic review of randomized controlled trials. <i>Hum Psychopharmacol</i> . 2009;24:19-28.                                                                                                                                                                                                                                                                                                                                                          |
| Chauhan, 2012, 1348      | Chauhan BF, Ducharme FM. Addition to inhaled corticosteroids of long-acting beta 2 -agonists versus anti-leukotrienes for chronic asthma. <i>Cochrane Database Syst Rev</i> . 2014;(1). doi:10.1002/14651858.CD003137.pub5.                                                                                                                                                                                                                                                                                                                                                                        |
| Chauhan, 2014, 8681      | Chauhan B, Ducharme F. Anti-leukotriene agents compared to inhaled corticosteroids in the management of recurrent and / or chronic asthma in adults and children ( Review ). <i>Cochrane Database Syst Rev</i> . 2012;(4). doi:10.1002/14651858.CD002314.pub3.Anti-leukotriene.                                                                                                                                                                                                                                                                                                                    |
| Chen, 2015, 8742         | Chen Y, Wang H, Lu Y, Huang X, Liao Y, Bin J. Effects of mineralocorticoid receptor antagonists in patients with preserved ejection fraction: a meta-analysis of randomized clinical trials. <i>BMC Med</i> . 2015;13:10. doi:10.1186/s12916-014-0261-8.                                                                                                                                                                                                                                                                                                                                           |
| Cheyne, 2015, 8744       | Cheyne L, Irvin-Sellers MJ, White J. Tiotropium versus ipratropium bromide for chronic obstructive pulmonary disease. <i>Cochrane Database Syst Rev</i> . 2015;(9):N.PAG. doi:10.1002/14651858.CD009552.pub3.www.cochranelibrary.com.                                                                                                                                                                                                                                                                                                                                                              |

|                            |                                                                                                                                                                                                                                                                                                                                                             |
|----------------------------|-------------------------------------------------------------------------------------------------------------------------------------------------------------------------------------------------------------------------------------------------------------------------------------------------------------------------------------------------------------|
| Chong, 2012, 1438          | Chong J, Karner C, Poole P. Tiotropium versus long-acting beta-agonists for stable chronic obstructive pulmonary disease. <i>Cochrane Database Syst Rev.</i> 2012;9(9):CD009157. doi:10.1002/14651858.CD009157.pub2.                                                                                                                                        |
| Coeytaux, 2014, 8747       | Coeytaux R, Schmit K, Kraft B, et al. Comparative Effectiveness and Safety of Drug Therapy for Pulmonary Arterial Hypertension: A Systematic Review and Meta-analysis. <i>Chest.</i> 2014;145(5):1055-1063. doi:10.1378/chest.13-1864.                                                                                                                      |
| Cordina, 2005, 1606        | Cordina J, Mead G. Pharmacological cardioversion for atrial fibrillation and flutter. <i>Indian Pacing Electrophysiol J.</i> 2005;6(1):31. <a href="http://www.ncbi.nlm.nih.gov/pubmed/16943892">http://www.ncbi.nlm.nih.gov/pubmed/16943892</a> .                                                                                                          |
| Costa, 2013, 1629          | Costa J, Magro F, Caldeira D, Alarcao J, Sousa R, Vaz-Carneiro A. Infliximab reduces hospitalizations and surgery interventions in patients with inflammatory bowel disease: a systematic review and meta-analysis. <i>Inflamm Bowel Dis.</i> 2013;19(10):2098-2110.                                                                                        |
| Danchin, 2006, 1752        | Danchin N, Cucherat M, Thuillez C, Durand E, Kadri Z, Steg PG. Angiotensin-converting enzyme inhibitors in patients with coronary artery disease and absence of heart failure or left ventricular systolic dysfunction: An overview of long-term randomized controlled trials. <i>Arch Intern Med.</i> 2006;166(7):787-796. doi:10.1001/archinte.166.7.787. |
| DiNicolantonio, 2013, 1991 | Dinicolantonio JJ, Lavie CJ, Fares H, Menezes AR, O'Keefe JH. Meta-analysis of carvedilol versus beta 1 selective beta-blockers (atenolol, bisoprolol, metoprolol, and nebivolol). <i>Am J Cardiol.</i> 2013;111(5):765-769. doi:10.1016/j.amjcard.2012.11.031.                                                                                             |
| Doyle, 2009, 2055          | Doyle JF, Ho KM. Benefits and risks of long-term amiodarone therapy for persistent atrial fibrillation: a meta-analysis. <i>Mayo Clin Proc.</i> 2009;84(3):234-242. doi:10.1016/S0025-6196(11)61140-3.                                                                                                                                                      |
| Ducharme, 2010, 2095       | Ducharme FM, Ni Chroinin M, Greenstone I, Lasserson TJ. Addition of long-acting beta2-agonists to inhaled steroids versus higher dose inhaled steroids in adults and children with persistent asthma. <i>Cochrane Database Syst Rev.</i> 2010;(4):CD005533. doi:10.1002/14651858.CD005533.pub2.                                                             |
| Ebell, 2013, 2148          | Ebell MH, Call M, Shinholser J. Effectiveness of oseltamivir in adults: A meta-analysis of published and unpublished clinical trials. <i>Fam Pract.</i> 2013;30(2):125-133. doi:10.1093/fampra/cms059.                                                                                                                                                      |
| Edmonds, 2012, 2158        | Edmonds M, Milan S, Brenner B, Camargo Jr C, Rowe B. Inhaled steroids for acute asthma following emergency department discharge (Review). <i>Cochrane Database Syst Rev.</i> 2012;(12). doi:10.1002/14651858.CD002316.pub2.Copyright.                                                                                                                       |
| Edmonds, 2012, 2159        | Edmonds M, Milan S, Camargo Jr C, Pollack C, Rowe B. Early use of inhaled corticosteroids in the emergency department treatment of acute asthma (Review). <i>Cochrane Database Syst Rev.</i> 2012;(12). doi:10.1002/14651858.CD002308.pub2.Copyright.                                                                                                       |
| Ezekowitz, 2009, 2304      | Ezekowitz JA, McAlister FA. Aldosterone blockade and left ventricular dysfunction: A systematic review of randomized clinical trials. <i>Eur Heart J.</i> 2009;30(4):469-477. doi:10.1093/eurheartj/ehn543.                                                                                                                                                 |
| Farne, 2015, 8767          | Farne H, Cates C. Long-acting beta 2 -agonist in addition to tiotropium versus either tiotropium or long-acting beta 2 -agonist alone for chronic obstructive pulmonary disease. <i>Cochrane Database Syst Rev.</i> 2015;10(6):CD008989. doi:10.1002/14651858.CD008989.pub3.                                                                                |
| Filippini, 2003, 2402      | Filippini G, Munari L, Incorvaia B, et al. Interferons in relapsing remitting multiple sclerosis: a systematic review. <i>Lancet.</i> 2003;361(9357):545-552. doi:10.1016/S0140-6736(03)12512-3.                                                                                                                                                            |
| Fisher, 2014, 8769         | Fisher S, Zhang H, Doree C, Mathur A, Martin-Rendon E. Stem cell treatment for acute myocardial infarction. <i>Cochrane database Syst Rev.</i> 2015;(9).                                                                                                                                                                                                    |
| Fisher, 2015, 8770         | Fisher SA, Doree C, Mathur A, Martin-Rendon E. Meta-analysis of cell therapy trials for patients with heart failure. <i>Circ Res.</i> 2015;116(8):1361-1377. doi:10.1161/CIRCRESAHA.116.304386.                                                                                                                                                             |
| Fisher, 2015, 8771         | Fisher SA, Brunskill SJ, Doree C, Mathur A, Taggart DP, Martin-Rendon E. Stem cell therapy for chronic ischaemic heart disease and congestive heart failure. <i>Cochrane Database Syst Rev.</i> 2014;(4). doi:10.1002/14651858.CD007888.pub2. <a href="http://www.cochranelibrary.com">www.cochranelibrary.com</a> .                                        |
| Fox, 2011, 2496            | Fox BD, Shimony A, Langleben D. Meta-analysis of monotherapy versus combination therapy for pulmonary arterial hypertension. <i>Am J Cardiol.</i> 2011;108(8):1177-1182. doi:10.1016/j.amjcard.2011.06.021.                                                                                                                                                 |
| Fu, 2012, 2549             | Fu M, Zhou J, Sun A, et al. Efficacy of ACE inhibitors in chronic heart failure with preserved ejection fraction - A meta analysis of 7 prospective clinical studies. <i>Int J Cardiol.</i> 2012;155(1):33-38. doi:10.1016/j.ijcard.2011.01.081.                                                                                                            |
| Gandhi, 2014, 2599         | Gandhi S, Mosleh W, Myers RBH. Hypertonic saline with furosemide for the treatment of acute congestive heart failure: A systematic review and meta-analysis. <i>Int J Cardiol.</i> 2014;173(2):139-145. doi:10.1016/j.ijcard.2014.03.020.                                                                                                                   |
| Gao, 2014, 8775            | Gao YH, Guan WJ, Xu G, et al. Macrolide therapy in adults and children with non-cystic fibrosis bronchiectasis: A systematic review and meta-analysis. <i>PLoS One.</i> 2014;9(3):1-12. doi:10.1371/journal.pone.0090047.                                                                                                                                   |
| Garside, 2007, 2640        | Garside R, Pitt M, Anderson R, et al. The Effectiveness and Cost-Effectiveness of Cinacalcet for Secondary Hyperparathyroidism in End-Stage Renal Disease Patients on Dialysis: A Systematic Review and Economic Evaluation. <i>Vol 11.</i> ; 2007. doi:10.1038/ncpneph0039.                                                                                |
| Grimwade, 2003, 2933       | Grimwade K, Swingle. Cotrimoxazole prophylaxis for opportunistic infections in adults with HIV. <i>Cochrane Database Syst Rev.</i> 2003;(3):Cd003108. doi:10.1002/14651858.cd003108.                                                                                                                                                                        |
| Grooten, 2015, 8780        | Grooten IJ, Vinke ME, Roseboom TJ, Painter RC. A Systematic Review and Meta-Analysis of the Utility of Corticosteroids in the Treatment of Hyperemesis Gravidarum. <i>Nutr Metab Insights.</i> 2015;8(Suppl 1):23-32. doi:10.4137/NMI.S29532.                                                                                                               |
| Hemkens, 2016, 8784        | Hemkens LG, Ewald H, Gloy VL, et al. Colchicine for prevention of cardiovascular events. <i>Cochrane database Syst Rev.</i> 2016;(1):CD011047. doi:10.1002/14651858.CD011047.pub2.                                                                                                                                                                          |
| Heran, 2012, 3275          | Heran B, Musini V, Bassett K, Taylor R, Wright J. Angiotensin receptor blockers for heart failure. <i>Cochrane Databased Syst Rev.</i> 2012;(4). doi:10.1002/14651858.CD003040.pub2.                                                                                                                                                                        |

|                         |                                                                                                                                                                                                                                                                                                                                                                                                                     |
|-------------------------|---------------------------------------------------------------------------------------------------------------------------------------------------------------------------------------------------------------------------------------------------------------------------------------------------------------------------------------------------------------------------------------------------------------------|
| Hood, 2014, 3415        | Hood W, Dans A, Guyatt G, Jaeschke R, McMurray J. Digitalis for treatment of heart failure in patients in sinus rhythm. <i>Cochrane Database Syst Rev.</i> 2014;(4).                                                                                                                                                                                                                                                |
| Jaeschke, 2008, 3639    | Jaeschke R, O'Byrne PM, Mejza F, et al. The safety of long-acting b-agonists among patients with asthma using inhaled corticosteroids: Systematic review and metaanalysis. <i>Am J Respir Crit Care Med.</i> 2008;178(10):1009-1016. doi:10.1164/rccm.200804-494OC.                                                                                                                                                 |
| Jaeschke, 2008, 3640    | Jaeschke R, O'Byrne PM, Mejza F, et al. The safety of long-acting beta-agonists among patients with asthma using inhaled corticosteroids: systematic review and metaanalysis. <i>Am J Respir Crit Care Med.</i> 2008;178:1009-1016. doi:10.1164/rccm.200804-494OC.                                                                                                                                                  |
| James, 2008, 3657       | James MT, Conley J, Tonelli M, Manns BJ, Macrae J. Meta-analysis : Antibiotics for Prophylaxis against Hemodialysis Catheter – Related Infections. <i>Ann Intern Med.</i> 2008;148:596-605.                                                                                                                                                                                                                         |
| Jankowska, 2016, 8790   | Jankowska EA, Suchocki T, Tkaczyszyn M, et al. Effects of Intravenous Iron Therapy in Iron Deficient Patients With Systolic Heart Failure: Meta-Analysis of Randomized Control Trials. <i>J Am Coll Cardiol.</i> 2016;65(10):A854. doi:10.1016/S0735-1097(15)60854-3.                                                                                                                                               |
| Jefferson, 2014, 3696   | Jefferson T, Ma J, Doshi P, et al. Neuraminidase inhibitors for preventing and treating influenza in healthy adults and children ( Review ) Neuraminidase inhibitors for preventing and treating influenza in healthy adults and children. <i>Cochrane Database Syst Rev.</i> 2014;(4):4-8. doi:10.1002/14651858.CD008965.pub4.Copyright.                                                                           |
| Jong, 2002, 3781        | Jong P, Demers C, McKelvie RS, Liu PP. Angiotensin receptor blockers in heart failure: Meta-analysis of randomized controlled trials. <i>J Am Coll Cardiol.</i> 2002;39(3):463-470. doi:http://dx.doi.org/10.1016/S0735-1097%2801%2901775-2.                                                                                                                                                                        |
| Kang, 2007, 3877        | Kang S, Yang Y, CJ L, Gao R. Effectiveness and tolerability of administration of granulocyte colony-stimulating factor on left ventricular function in patients with myocardial infarction: a meta-analysis of randomized controlled trials. <i>Clin Ther.</i> 2007;29(11):2406-2418 13p. http://proxy.lib.sfu.ca/login?url=http://search.ebscohost.com/login.aspx?direct=true&db=ccm&AN=105856986&site=ehost-live. |
| Kang, 2008, 3879        | Kang S, Yang Y-J, Li C-J, Gao R-L. Effects of intracoronary autologous bone marrow cells on left ventricular function in acute myocardial infarction: a systematic review and meta-analysis for randomized controlled trials. <i>Coron Artery Dis.</i> 2008;19(5):327-335. doi:10.1097/MCA.0b013e328300dbd3.                                                                                                        |
| Kansagara, 2013, 3885   | Kansagara D, Dyer E, Englander H, Fu R, Freeman M, Kagen D. Treatment of Anemia in Patients With Heart Disease. <i>Ann Intern Med.</i> 2013.                                                                                                                                                                                                                                                                        |
| Karner, 2011, 3908      | Karner C, Cates C. Combination inhaled steroid and long-acting beta2-agonist in addition to tiotropium versus tiotropium or combination alone for chronic obstructive pulmonary disease (Review). <i>Cochrane Database Syst Rev.</i> 2011;(3).                                                                                                                                                                      |
| Karner, 2014, 8692      | Karner C, Chong J, Poole P. Tiotropium versus placebo for chronic obstructive pulmonary disease. <i>Cochrane Database Syst Rev.</i> 2014;(7). doi:10.1002/14651858.CD009285.pub3.                                                                                                                                                                                                                                   |
| Kaur, 2014, 3937        | Kaur N, Pandey A, Negi H, et al. Effect of HDL-raising drugs on cardiovascular outcomes: A systematic review and meta-regression. <i>PLoS One.</i> 2014;9(4):1-11. doi:10.1371/journal.pone.0094585.                                                                                                                                                                                                                |
| Kew, 2014, 4002         | Kew KM, Kirtchuk L, Michell CI. Intravenous magnesium sulfate for treating adults with acute asthma in the emergency department. <i>Cochrane Database Syst Rev.</i> 2014;(5).                                                                                                                                                                                                                                       |
| Kew, 2013, 4003         | Kew KM, Mavergames C, Walters JA. Long-acting beta 2 -agonists for chronic obstructive pulmonary disease. <i>Cochrane Database Syst Rev.</i> 2013;(10). doi:10.1002/14651858.CD010177.pub2.                                                                                                                                                                                                                         |
| Kew, 2014, 4004         | Kew KM, Seniukovich A. Inhaled steroids and risk of pneumonia for chronic obstructive pulmonary disease. <i>Cochrane Database Syst Rev.</i> 2014;(12). http://ovidsp.ovid.com/ovidweb.cgi?T=JS&PAGE=reference&D=coch&NEWS=N&AN=00075320-100000000-08440.                                                                                                                                                            |
| Kew, 2016, 8802         | Kew K, Dahri K. Long-acting muscarinic antagonists ( LAMA ) added to combination long-acting beta 2 -agonists and inhaled corticosteroids ( LABA / ICS ) versus LABA / ICS for adults with asthma ( Review ) SUMMARY OF FINDINGS FOR THE MAIN COMPARISON. <i>Cochrane Database Syst Rev.</i> 2016;(1). doi:10.1002/14651858.CD011721.pub2.www.cochranelibrary.com.                                                  |
| Kew, 2015, 8803         | Kew K, Evans D, Allison D, Boyter A. Long-acting muscarinic antagonists ( LAMA ) added to inhaled corticosteroids ( ICS ) versus addition of long-acting beta 2 - agonists ( LABA ) for adults with asthma ( Review ). <i>Cochrane Database Syst Rev.</i> 2015;(6). doi:10.1002/14651858.CD011438.pub2.www.cochranelibrary.com.                                                                                     |
| Kew, 2015, 8805         | Kew K, Undela K, Kotortsy I, Ferrara G. Macrolides for chronic asthma (Review). <i>Cochrane Libr.</i> 2015;(3). doi:10.1002/14651858.CD002997.pub4.www.cochranelibrary.com.                                                                                                                                                                                                                                         |
| Kishimoto, 2013, 4065   | Kishimoto T, Agarwal V, Kishi T, Leucht S, Kane JM, Correll CU. Relapse prevention in schizophrenia: a systematic review and meta-analysis of second-generation antipsychotics versus first-generation antipsychotics. <i>Mol Psychiatry.</i> 2013;18(1):53-66. doi:10.1038/mp.2011.143.                                                                                                                            |
| Kishimoto, 2014, 4067   | Kishimoto T, Robenzadeh A, Leucht C, et al. Long-acting injectable vs oral antipsychotics for relapse prevention in schizophrenia: A meta-analysis of randomized trials. <i>Schizophr Bull.</i> 2014;40(1):192-213. doi:10.1093/schbul/sbs150.                                                                                                                                                                      |
| Komossa, 2010, 4123     | Komossa K, Hunger H, Schmid F, et al. Olanzapine versus other atypical antipsychotics for schizophrenia ( Review ) Olanzapine versus other atypical antipsychotics for schizophrenia. <i>Cochrane Database Syst Rev.</i> 2010;(3). doi:10.1002/14651858.CD006654.pub2.Copyright.                                                                                                                                    |
| Kuenzli, 2010, 4206     | Kuenzli A, Bucher HC, Anand I, et al. Meta-analysis of combined therapy with angiotensin receptor antagonists versus ACE inhibitors alone in patients with heart failure. <i>PLoS One.</i> 2010;5(4). doi:10.1371/journal.pone.0009946.                                                                                                                                                                             |
| Kumar, 2014, 8815       | Kumar G, Stendall C, Mistry R, Gurusamy K, Walker D. A comparison of total intravenous anaesthesia using propofol with sevoflurane or desflurane in ambulatory surgery: Systematic review and meta-analysis. <i>Anaesthesia.</i> 2014;69(10):1138-1150. doi:10.1111/anae.12713.                                                                                                                                     |
| Kuswardhani, 2011, 4239 | Kuswardhani RA, Soejitno A. Bone marrow-derived stem cells as an adjunctive treatment for acute myocardial infarction: a systematic review and meta-analysis. <i>Acta Med Indones.</i> 2011;43(3):168-177. http://www.ncbi.nlm.nih.gov/pubmed/21979282.                                                                                                                                                             |
| La Mantia, 2010, 4260   | La Mantia L, Munari L, Lovati R. Glatiramer acetate for multiple sclerosis. <i>Cochrane Database Syst Rev.</i> 2010;(5):N.PAG-N.PAG. doi:10.1002/14651858.CD004678.                                                                                                                                                                                                                                                 |

|                       |                                                                                                                                                                                                                                                                                                                                |
|-----------------------|--------------------------------------------------------------------------------------------------------------------------------------------------------------------------------------------------------------------------------------------------------------------------------------------------------------------------------|
| Lasserson, 2011, 4362 | Lasserson TJ, Cates CJ, Ferrara G. G, Casali L. L. Combination fluticasone and salmeterol versus fixed dose combination budesonide and formoterol for chronic asthma in adults and children. <i>Cochrane Database Syst Rev.</i> 2011;(12). doi:10.1002/14651858.CD004106.pub3.                                                 |
| Le, 2016, 8817        | Le H-H, El-Khatib C, Mombled M, et al. Impact of Aldosterone Antagonists on Sudden Cardiac Death Prevention in Heart Failure and Post-Myocardial Infarction Patients: A Systematic Review and Meta-Analysis of Randomized Controlled Trials. <i>PLoS One.</i> 2016;11(2):e0145958. doi:10.1371/journal.pone.0145958.           |
| Leucht, 2011, 4505    | Leucht C, Heres S, Kane JM, Kissling W, Davis JM, Leucht S. Oral versus depot antipsychotic drugs for schizophrenia-A critical systematic review and meta-analysis of randomised long-term trials. <i>Schizophr Res.</i> 2011;127(1-3):83-92. doi:10.1016/j.schres.2010.11.020.                                                |
| Leucht, 2012, 4508    | Leucht S, Tardy M, Komossa K, et al. Maintenance treatment with antipsychotic drugs for schizophrenia ( Review ) Maintenance treatment with antipsychotic drugs for schizophrenia. <i>Cochrane Database Syst Rev.</i> 2012;(5):10-12. doi:10.1002/14651858.CD008016.pub2.Copyright.                                            |
| Levy, 2010, 4518      | Levy BF, Tilney HS, Dowson HMP, Rockall TA. A systematic review of postoperative analgesia following laparoscopic colorectal surgery. <i>Color Dis.</i> 2010;12(1):5-15. doi:10.1111/j.1463-1318.2009.01799.x.                                                                                                                 |
| Li, 2016, 8822        | Li L, Li S, Liu J, et al. Glucagon-like peptide-1 receptor agonists and heart failure in type 2 diabetes: systematic review and meta-analysis of randomized and observational studies. <i>BMC Cardiovasc Disord.</i> 2016;16(1):91. doi:10.1186/s12872-016-0260-0.                                                             |
| Liew, 2014, 4577      | Liew AY, Eikelboom JW, Connolly SJ, M OD, Hart RG. Efficacy and safety of warfarin vs. antiplatelet therapy in patients with systolic heart failure and sinus rhythm: a systematic review and meta-analysis of randomized controlled trials. <i>Int J Stroke.</i> 2014;9(2):199-206. doi:http://dx.doi.org/10.1111/ij.s.12036. |
| Lipinski, 2009, 4615  | Lipinski MJ, Cauthen CA, Biondi-Zoccai GGL, et al. Meta-Analysis of Randomized Controlled Trials of Statins Versus Placebo in Patients With Heart Failure. <i>Am J Cardiol.</i> 2009;104(12):1708-1716. doi:10.1016/j.amjcard.2009.07.055.                                                                                     |
| Liu, 2014, 4629       | Liu F, Chen Y, Feng X, Teng Z, Yuan Y, Bin J. Effects of beta-blockers on heart failure with preserved ejection fraction: A meta-analysis. <i>PLoS One.</i> 2014;9(3). doi:10.1371/journal.pone.0090555.                                                                                                                       |
| Liu, 2014, 8826       | Liu G, Zheng XX, Xu YL, Lu J, Hui RT, Huang XH. Effects of lipophilic statins for heart failure: A meta-analysis of 13 randomised controlled trials. <i>Hear Lung Circ.</i> 2014;23(10):970-977. doi:10.1016/j.hlc.2014.05.005.                                                                                                |
| Liu, 2014, 8827       | Liu X, Wang D, Zheng L, Mou T, Liu H, Li G. Is Early Oral Feeding after Gastric Cancer Surgery Feasible ? A Systematic Review and Meta-Analysis of Randomized Controlled Trials. <i>PLoS One.</i> 2014;9(11). doi:10.1371/journal.pone.0112062.                                                                                |
| Lopez, 2015, 8829     | Lopez A, Ford A, Colombel J, Reinisch W, Sandborn W, Peyrin-Biroulet L. Efficacy of tumour necrosis factor antagonists on remission, colectomy and hospitalisations in ulcerative colitis: Meta-analysis of placebo-controlled trials. <i>Dig Liver Dis.</i> 2015;47(5):356-364. doi:10.1016/j.dld.2015.01.148.                |
| Magee, 2003, 4812     | Magee L, Duley L. Oral beta-blockers for mild to moderate hypertension during pregnancy ( Review ). <i>Cochrane Database Syst Rev.</i> 2003;(3).                                                                                                                                                                               |
| Magee, 2000, 4815     | Magee LA, Elran E, Bull SB, Logan A, Koren G. Risks and benefits of b-receptor blockers for pregnancy hypertension: Overview of the randomized trials. <i>Eur J Obstet Gynecol Reprod Biol.</i> 2000;88(1):15-26. doi:10.1016/S0301-2115(99)00113-X.                                                                           |
| Makani, 2013, 4838    | Makani H, Bangalore S, Desouza K a, Shah A, Messerli FH. Efficacy and safety of dual blockade of the renin-angiotensin system: meta-analysis of randomised trials. <i>BMJ.</i> 2013;346(January):f360. doi:10.1136/bmj.f360.                                                                                                   |
| Makrides, 2014, 4844  | Makrides M, Crowther CA. Magnesium supplementation in pregnancy. <i>Cochrane database Syst Rev.</i> 2014;(4):CD000937. doi:10.1002/14651858.CD000937.                                                                                                                                                                          |
| Mannucci, 2008, 4889  | Mannucci E, Monami M, Lamanna C, Gensini GF, Marchionni N. Pioglitazone and cardiovascular risk. A comprehensive meta-analysis of randomized clinical trials. <i>Diabetes Obes Metab.</i> 2008;10(12):1221-1238. doi:10.1111/j.1463-1326.2008.00892.x.                                                                         |
| Medic, 2016, 8842     | Medic G, Lindner L, van der Weijden M, Karabis A. Efficacy and Safety of Acclidinium/Formoterol versus Tiotropium in COPD: Results of an Indirect Treatment Comparison. <i>Adv Ther.</i> 2016;33(3):379-399. doi:10.1007/s12325-016-0299-4.                                                                                    |
| Mohammed, 2007, 5325  | Mohammed S, Goodacre S. Intravenous and nebulised magnesium sulphate for acute asthma: systematic review and meta-analysis. <i>Emerg Med J.</i> 2007;24(12):823-830. doi:10.1136/emj.2007.052050.                                                                                                                              |
| Møiniche, 2003, 5330  | Møiniche S, Rømsing J, Dahl JB, Tramèr MR. Nonsteroidal antiinflammatory drugs and the risk of operative site bleeding after tonsillectomy: a quantitative systematic review. <i>Anesth Analg.</i> 2003;96(1):68-77, table of contents. doi:10.1213/01.ANE.0000040583.65135.57.                                                |
| Moore, 2006, 5371     | Moore RA, Derry S. Systematic review and meta-analysis of randomised trials and cohort studies of mycophenolate mofetil in lupus nephritis. <i>Arthritis Res Ther.</i> 2006;8(6):R182. doi:10.1186/ar2093.                                                                                                                     |
| Nair, 2012, 5515      | Nair P, Milan SJ, Rowe BH. Addition of intravenous aminophylline to inhaled beta2-agonists in adults with acute asthma. <i>Cochrane Database Syst Rev.</i> 2012;12(4). doi:10.1002/14651858.CD002742.pub2.Copyright.                                                                                                           |
| Nannini, 2013, 5533   | Nannini L, Poole P, Milan S, Kesterton A. Combined corticosteroid and long-acting beta2 -agonist in one inhaler versus inhaled corticosteroids alone for chronic obstructive pulmonary disease (Review). <i>Cochrane Database Syst Rev.</i> 2013;(8).                                                                          |
| Nannini, 2013, 8694   | Nannini L, Poole P, Sj M, Holmes R, Normansell R. Combined corticosteroid and long-acting beta2-agonist in one inhaler versus placebo for chronic obstructive pulmonary disease (Review). <i>Cochrane Database Syst Rev.</i> 2013;(11):CD003794.                                                                               |
| Ngo, 2010, 5606       | Ngo K, Kotecha D, Walters J, et al. Erythropoiesis-stimulating agents for anaemia in chronic heart failure patients. <i>Cocherane Databased Syst Rev.</i> 2010;(1).                                                                                                                                                            |
| Ni, 2009, 5611        | Ni, Muireann, Greenstone I, Lasserson TJ, Ducharme FM. Addition of inhaled long-acting beta2-agonists to inhaled steroids as first line therapy for persistent asthma in steroid-naive adults and children. <i>Cochrane database Syst Rev.</i> 2009;(4):CD005307. doi:10.1002/14651858.CD005307.pub2.                          |



|                             |                                                                                                                                                                                                                                                                                                                                                                             |
|-----------------------------|-----------------------------------------------------------------------------------------------------------------------------------------------------------------------------------------------------------------------------------------------------------------------------------------------------------------------------------------------------------------------------|
| Ni, 2014, 8850              | Ni H, Soe Z, Moe S. Cochrane Database of Systematic Reviews Acridinium bromide for stable chronic obstructive pulmonary disease (Review) Acridinium bromide for stable chronic obstructive pulmonary disease (Review). Cochrane Database Syst Rev. 2014;(9). doi:10.1002/14651858.CD010509.pub2.                                                                            |
| Ni, 2015, 9197              | Ni W, Shao X, Cai X, et al. Prophylactic use of macrolide antibiotics for the prevention of chronic obstructive pulmonary disease exacerbation: A meta-analysis. PLoS One. 2015;10(3):1-13. doi:10.1371/journal.pone.0121257.                                                                                                                                               |
| Pizzi, 2011, 6161           | Pizzi C, Rutjes AWS, Costa GM, Fontana F, Mezzetti A, Manzoli L. Meta-analysis of selective serotonin reuptake inhibitors in patients with depression and coronary heart disease. Am J Cardiol. 2011;107(7):972-979. doi:10.1016/j.amjcard.2010.11.017.                                                                                                                     |
| Poole, 2015, 8867           | Poole P, Chong J, Cates C. Mucolytic agents versus placebo for chronic bronchitis or chronic obstructive pulmonary disease. Cochrane Database Syst Rev. 2015;(7). doi:10.1002/14651858.CD001287.pub5.                                                                                                                                                                       |
| Powell, 2015, 8868          | Powell C, Sj M, Dwan K, Bax L, Walters N. Mepolizumab versus placebo for asthma (Review). Cochrane Database Syst Rev. 2015;(7). doi:10.1002/14651858.CD010834.pub2.www.cochranelibrary.com.                                                                                                                                                                                 |
| Rajagopalan, 2011, 6347     | Rajagopalan S, Arora A, Shafiq N, et al. Pharmacotherapy of heart failure with normal ejection fraction (HFNEF) - a systematic review. Br J Clin Pharmacol. 2011;72(3):369-380. doi:10.1111/j.1365-2125.2011.03998.x.                                                                                                                                                       |
| Renner, 2012, 6442          | Renner P, Milazzo S, Liu JP, Zwahlen M, Birkmann J, Horneber M. Primary prophylactic colony-stimulating factors for the prevention of chemotherapy-induced febrile neutropenia in breast cancer patients. Cochrane Database Syst Rev. 2012;(10). doi:10.1002/14651858.CD007913.pub2.                                                                                        |
| Rodrigo, 1999, 6564         | Rodrigo GJ, Castro-Rodriguez JA. Anticholinergics in the treatment of children and adults with acute asthma: a systematic review with meta-analysis. Thorax. 2005;65(12):1118-1118. doi:10.1136/thx.2005.040444.                                                                                                                                                            |
| Rodrigo, 2000, 6566         | Rodrigo G, Rodrigo C, Burschtin O. A Meta-analysis of the effects of ipratropium bromide in adults with acute asthma. J Med. 1999;108(7):596-597. http://ovidsp.ovid.com/ovidweb.cgi?T=JS&CSC=Y&NEWS=N&PAGE=fulltext&D=med4&AN=10866596.                                                                                                                                    |
| Rodrigo, 2005, 6568         | Rodrigo GJ, Nannini LJ. Tiotropium for the treatment of stable chronic obstructive pulmonary disease: a systematic review with meta-analysis. Pulm Pharmacol Ther. 2007;20(5):495-502. doi:10.1016/j.pupt.2006.02.003.                                                                                                                                                      |
| Rodrigo, 2002, 6576         | Rodrigo GJ, Rodrigo C, Pollack C V, Rowe B. Use of Helium-Oxygen Mixtures in the Treatment of Acute Asthma: A Systematic Review Use of Helium-Oxygen Mixtures in the Treatment of Acute Asthma *. Chest. 2003;891-896. doi:10.1378/chest.123.3.891.                                                                                                                         |
| Rodrigo, 2003, 6578         | Rodrigo G, Rodrigo C. Corticosteroids in the Emergency Department Therapy of Acute Adult Asthma*. Chest. 1999;116(2):285-295. doi:10.1378/chest.116.2.285.                                                                                                                                                                                                                  |
| Rowe, 2000, 6670            | Rowe BH, Bretzlaff JA, Bourdon C, Bota GW, Camargo Jr. CA. Intravenous magnesium sulfate treatment for acute asthma in the emergency department: a systematic review of the literature. Ann Emerg Med. 2000;36(3):181-190. doi:10.1067/mem.2000.105659.                                                                                                                     |
| Rowe, 1992, 6672            | Rowe BH, Keller JL, Oxman AD. Effectiveness of steroid therapy in acute exacerbations of asthma: A meta- analysis. Am J Emerg Med. 1992;10(4):301-310. http://www.embase.com/search/results?subaction=viewrecord&from=export&id=L22241536%5Cnhttp://dx.doi.org/10.1016/0735-6757(92)90007-K.                                                                                |
| Rowe, 2001, 6676            | Rowe BH, Spooner CH, Ducharme FM, Bretzlaff JA, Bota GW. Corticosteroids for preventing relapse following acute exacerbations of asthma. Cochrane Database Syst Rev. 2007;(2):Cd000195.                                                                                                                                                                                     |
| Rowe, 2007, 6677            | Rowe B, Spooner C, Ducharme F, Bretzlaff F, Bota G. Early emergency department treatment of acute asthma with systemic corticosteroids. Cochrane Database Syst Rev. 2001;(2):Cd002178.                                                                                                                                                                                      |
| Saab, 2015, 8884            | Saab S, Suraweera D, Au J, Saab EG, Alper TS, Tong MJ. Probiotics are helpful in hepatic encephalopathy: a meta-analysis of randomized trials. Liver Int. 2015;36(7):986-993. doi:10.1111/liv.13005.                                                                                                                                                                        |
| Saha, 2007, 6746            | Saha S a, Molnar J, Arora RR. Tissue angiotensin-converting enzyme inhibitors for the prevention of cardiovascular disease in patients with diabetes mellitus without left ventricular systolic dysfunction or clinical evidence of heart failure: a pooled meta-analysis of randomized place. Diabetes Obes Metab. 2008;10(1):41-52. doi:10.1111/j.1463-1326.2006.00688.x. |
| Saha , 2008, 6747           | Saha S a, Molnar J, Arora RR. Tissue ACE inhibitors for secondary prevention of cardiovascular disease in patients with preserved left ventricular function: a pooled meta-analysis of randomized placebo-controlled trials. J Cardiovasc Pharmacol Ther. 2007;12(3):192-204. doi:10.1177/1074248407304791.                                                                 |
| Salpeter, 2006, 6795        | Salpeter SR, Buckley NS, Salpeter EE. Meta-analysis: Anticholinergics, but not $\beta$ -agonists, reduce severe exacerbations and respiratory mortality in COPD. J Gen Intern Med. 2006;21(10):1011-1019. doi:10.1111/j.1525-1497.2006.00507.x.                                                                                                                             |
| Salpeter, 2006, 6797        | Salpeter S, Buckley N, Ormiston T, Salpeter E. Meta-Analysis: Effect of Long-Acting B-Agonists on Severe Asthma Exacerbations and Asthma-Related Deaths. Ann Intern Med. 2006;(9):350-358.                                                                                                                                                                                  |
| Sampson, 2013, 6806         | Sampson S, Joshi K, Mansour M, Adams CE. Intermittent drug techniques for schizophrenia. Schizophr Bull. 2013;39(5):960-961. doi:10.1093/schbul/sbt096.                                                                                                                                                                                                                     |
| Shan, 2013, 7029            | Shan Z, Rong Y, Yang W, et al. Intravenous and nebulized magnesium sulfate for treating acute asthma in adults and children: A systematic review and meta-analysis. Respir Med. 2013;107(3):321-330. doi:10.1016/j.rmed.2012.12.001.                                                                                                                                        |
| Stratton, 2013, 7484        | Stratton RJ, Hébuterne X, Elia M. A systematic review and meta-analysis of the impact of oral nutritional supplements on hospital readmissions. Ageing Res Rev. 2013;12(4):884-897. doi:10.1016/j.arr.2013.07.002.                                                                                                                                                          |
| Su, 2014, 7504              | Su Q, Li L, Naing KA, Sun Y. Safety and Effectiveness of Nitroprusside in Preventing No-Reflow During Percutaneous Coronary Intervention: A Systematic Review. Cell Biochem Biophys. 2014;68(1):201-206. doi:10.1007/s12013-013-9690-9.                                                                                                                                     |
| Susantitaphon B, 2013, 7543 | Susantitaphong P, Sewaralthahab K, Balk EM, Eiam-Ong S, Madias NE, Jaber BL. Efficacy and safety of combined vs. Single renin-angiotensin-aldosterone system blockade in chronic kidney disease: A meta-analysis. Am J Hypertens. 2013;26(3):424-441. doi:10.1093/ajh/hps038.                                                                                               |

|                      |                                                                                                                                                                                                                                                                                                                                                                                                                                                                                   |
|----------------------|-----------------------------------------------------------------------------------------------------------------------------------------------------------------------------------------------------------------------------------------------------------------------------------------------------------------------------------------------------------------------------------------------------------------------------------------------------------------------------------|
| Taylor, 2001, 7647   | Taylor FC, Cohen H, Ebrahim S. Systematic review of long term anticoagulation or antiplatelet treatment in patients with non-rheumatic atrial fibrillation. [Erratum appears in BMJ. 2001 Mar 10;322(7286):587]. BMJ. 2001;322(7282):321-326. <a href="http://ovidsp.ovid.com/ovidweb.cgi?T=JS&amp;CSC=Y&amp;NEWS=N&amp;PAGE=fulltext&amp;D=med4&amp;AN=11159653">http://ovidsp.ovid.com/ovidweb.cgi?T=JS&amp;CSC=Y&amp;NEWS=N&amp;PAGE=fulltext&amp;D=med4&amp;AN=11159653</a> . |
| Tonelli, 2008, 7787  | Tonelli M, Klarenbach S, Wiebe N, Shrive F, Hemmelgarn B, Manns B. Erythropoiesis-Stimulating Agents for Anemia of Chronic Kidney Disease: Systematic Review and Economic Evaluation [Technology Report Number 106]. Ottawa; 2008.                                                                                                                                                                                                                                                |
| Walters, 2014, 8704  | Walters J a, Gibson PG, Wood-Baker R, Hannay M, Walters EH. Systemic corticosteroids for acute exacerbations of chronic obstructive pulmonary disease. Cochrane Database Syst Rev. 2014;(4):CD001288 ST-Systemic corticosteroids for acute. doi:10.1002/14651858.CD001288.pub3 [doi] ET - 2009/01/23.                                                                                                                                                                             |
| Wilt, 2007, 8367     | Wilt T, Niewoehner D, MacDonald R, RL K. Clinical guidelines. Management of stable chronic obstructive pulmonary disease: a systematic review for a clinical practice guideline. Ann Intern Med. 2007;147(9):639-141 16p. <a href="http://search.ebscohost.com/login.aspx?direct=true&amp;db=ccm&amp;AN=105932449&amp;site=ehost-live">http://search.ebscohost.com/login.aspx?direct=true&amp;db=ccm&amp;AN=105932449&amp;site=ehost-live</a> .                                   |
| Xie, 2016, 8916      | Xie W, Zheng F, Song X, Zhong B, Yan L. Renin-angiotensin-aldosterone system blockers for heart failure with reduced ejection fraction or left ventricular dysfunction: Network meta-analysis. Int J Cardiol. 2016;205:65-71. doi:10.1016/j.ijcard.2015.12.010.                                                                                                                                                                                                                   |
| Yang, 2015, 8918     | Yang L, Gao L, Chen Y, et al. Prophylactic Antibiotics in Prostate Biopsy: A Meta-Analysis Based on Randomized Controlled Trials. Surg Infect (Larchmt). 2015;16(6):733-747. doi:10.1089/sur.2015.040.                                                                                                                                                                                                                                                                            |
| Yohannes, 2011, 8511 | Yohannes AM, Willgoss TG, Vestbo J. Tiotropium for treatment of stable COPD: a meta-analysis of clinically relevant outcomes. Respir Care. 2011;56:477-487. doi:10.4187/respcare.00852.                                                                                                                                                                                                                                                                                           |
| Zhang, 2011, 8604    | Zhang PH, Jia CE, Lv Y, Gibson PG, Wang G. Montelukast for prevention and treatment of asthma exacerbations in adults: systematic review and meta-analysis. Allergy Asthma Proc. 2014;35(4):278-287.                                                                                                                                                                                                                                                                              |
| Zhang, 2016, 8922    | Zhang Q, Chen Y, Liu Q, Shan Q. Effects of renin-angiotensin-aldosterone system inhibitors on mortality, hospitalization, and diastolic function in patients with HFpEF: A meta-analysis of 13 randomized controlled trials. Herz. 2016;41(1):76-86. doi:10.1007/s00059-015-4346-8.                                                                                                                                                                                               |
| Zhang, 2014, 9143    | Zhang S, Zhang L, Sun A, Jiang H, Qian J, Ge J. Efficacy of statin therapy in chronic systolic cardiac insufficiency: A meta-analysis. Eur J Intern Med. 2011;22(5):478-484. doi:10.1016/j.ejim.2011.06.003.                                                                                                                                                                                                                                                                      |
| Zhou, 2014, 8928     | Zhou X, Chen J. Is treatment with trimetazidine beneficial in patients with chronic heart failure? PLoS One. 2014;9(5). doi:10.1371/journal.pone.0094660.                                                                                                                                                                                                                                                                                                                         |
| Ziff, 2015, 8931     | Ziff OJ, Lane DA, Samra M, et al. Safety and efficacy of digoxin: systematic review and meta-analysis of observational and controlled trial data. BMJ. 2015;351:h4451. doi:10.1136/bmj.h4451.                                                                                                                                                                                                                                                                                     |
| Zou, 2016, 8933      | Zou Y, Xiao J, Yang DH, Li J, Chen Q. Efficacy and Safety of an Aclidinium Bromide Treatment for 12 Weeks or Longer in Patients with Moderate-To-Severe COPD: A Meta-Analysis. COPD J Chronic Obstr Pulm Dis. 2016;2555(April):1-10. doi:10.3109/15412555.2015.1074172.                                                                                                                                                                                                           |

**Table S4. Information about included reviews**

| Author, Year, Review ID | Objective                                                                                                                                                                                                                                                                                                                                                                                                               | Disease description                 | Intervention vs. comparison                                                                                                                                                                          | No. of RCTs (patients)                         | Admissions were a primary outcome | AMSTAR score (/11) | Abstract conclusion                                                                                                                                                                                                                                                                                                                                                                                                                                                                                                                                                                                                                                                                                                                                                     |
|-------------------------|-------------------------------------------------------------------------------------------------------------------------------------------------------------------------------------------------------------------------------------------------------------------------------------------------------------------------------------------------------------------------------------------------------------------------|-------------------------------------|------------------------------------------------------------------------------------------------------------------------------------------------------------------------------------------------------|------------------------------------------------|-----------------------------------|--------------------|-------------------------------------------------------------------------------------------------------------------------------------------------------------------------------------------------------------------------------------------------------------------------------------------------------------------------------------------------------------------------------------------------------------------------------------------------------------------------------------------------------------------------------------------------------------------------------------------------------------------------------------------------------------------------------------------------------------------------------------------------------------------------|
| Afilalo, 2007, 100      | We sought to determine the effect of intensive statin therapy on all-cause mortality compared with moderate statin therapy in patients with recent acute coronary syndromes and in patients with stable coronary heart disease. Secondly, we examined the effects of intensive statin therapy on major adverse cardiovascular events admissions to hospital for heart failure, and adverse hepatic and muscular events. | Coronary artery disease             | Intensive statin therapy vs. Moderate statin therapy                                                                                                                                                 | Total: 6 (28505)<br>Admissions data: 4 (27548) | No                                | 6                  | Compared with moderate statin therapy, intensive statin therapy reduces all-cause mortality in patients with recent ACS but not in patients with stable CHD.                                                                                                                                                                                                                                                                                                                                                                                                                                                                                                                                                                                                            |
| Ahmed, 2014, 129        | Our objectives were to conduct a systematic review and to grade the quality of evidence to ascertain the effect of influenza vaccination of healthcare personnel on morbidity and mortality in patients of healthcare facilities.                                                                                                                                                                                       | Patients in healthcare facilities   | Influenza vaccination vs. Control                                                                                                                                                                    | Total: 4 (8468)<br>Admissions data: 2 (5972)   | Yes                               | 6                  | The quality of evidence is higher for mortality than for other outcomes. HCP influenza vaccination can enhance patient safety.                                                                                                                                                                                                                                                                                                                                                                                                                                                                                                                                                                                                                                          |
| Akiyomen, 2016, 8711    | The purpose of this study was to conduct a systematic review and meta-analysis assessing the long-term effects of ARBs as a class on BP control, myocardial infarction, hospitalization for heart failure, cerebrovascular events (ie, stroke), cardiovascular mortality, and all-cause mortality.                                                                                                                      | Essential hypertension              | Long-term angiotensin receptor blockade vs. Placebo or placebo with second-line non-ARB antihypertensive therapy permitted                                                                           | Total: 7 (16864)<br>Admissions data: 2 (6611)  | No                                | 7                  | Our findings suggest that ARBs, as a class, are more effective than placebo therapy in long-term BP lowering in patients with essential hypertension. Long-term ARB treatment may also confer enhanced protection against stroke but not other cardiovascular outcomes relative to placebo. J Am Soc Hypertens 2016;10(1):55–69. 2016 American Society of Hypertension.                                                                                                                                                                                                                                                                                                                                                                                                 |
| Anderson, 2015, 8714    | To assess the efficacy and safety of a long-acting muscarinic antagonist (LAMA) added to any dose of an inhaled corticosteroid (ICS) compared with the same dose of ICS alone for adults whose asthma is not well controlled.                                                                                                                                                                                           | Asthma                              | Long-acting muscarinic antagonists (LAMA) added to inhaled corticosteroids (ICS) vs. Same dose inhaled corticosteroids                                                                               | Total: 5 (2563)<br>Admissions data: 5 (2562)   | No                                | 11                 | For adults taking ICS for asthma without a long-acting beta -agonist (LABA), LAMA given as add-on treatment reduces the likelihood of exacerbations requiring treatment with OCS and improves lung function. The benefits of LAMA combined with ICS for hospital admissions, all-cause serious adverse events, quality of life and asthma control remain unknown. Results of this review, along with findings of related reviews conducted to assess the use of LAMA in other clinical scenarios involving asthma, can help to define the role of LAMA in the management of asthma. Trials of longer duration (up to 52 weeks) would provide a better opportunity to observe rare events such as serious adverse events and exacerbations requiring hospital admission. |
| Assasi, 2009, 378       | The aim of this HTA is to evaluate the comparative clinical-effectiveness of anti-TNF- $\alpha$ drugs in patients with CD or UC with an inadequate response to conventional therapy and to determine the economic value of anti-TNF- $\alpha$ drugs compared with that of conventional therapy and surgical interventions.                                                                                              | Crohn's Disease, Ulcerative Colitis | Anti-tumor necrosis factor alpha drugs (Infliximab or Adalimumab) vs. Intra-class drug comparison; inter-class comparison of conventional therap; immunosuppressant drugs; or surgical interventions | Total: 20 (3132)<br>Admissions data: 4 (1137)  | No                                | 9                  | Although infliximab and adalimumab have been shown to provide clinical benefit, the costs associated with these treatments could be perceived as high. Based on the incremental cost-utility findings from our primary economic evaluations, adalimumab and infliximab for the treatment of IBD may not be perceived to be a cost-effective use of health care resources.                                                                                                                                                                                                                                                                                                                                                                                               |

|                        |                                                                                                                                                                                                                                                                                                                          |                                                                                                                             |                                                                                                          |                                                           |     |    |                                                                                                                                                                                                                                                                                                                                                                                                                                                                                                                               |
|------------------------|--------------------------------------------------------------------------------------------------------------------------------------------------------------------------------------------------------------------------------------------------------------------------------------------------------------------------|-----------------------------------------------------------------------------------------------------------------------------|----------------------------------------------------------------------------------------------------------|-----------------------------------------------------------|-----|----|-------------------------------------------------------------------------------------------------------------------------------------------------------------------------------------------------------------------------------------------------------------------------------------------------------------------------------------------------------------------------------------------------------------------------------------------------------------------------------------------------------------------------------|
| Badve, 2011, 446       | The aim of this systematic review was to study the benefits and risks of beta-adrenergic antagonists (betablockers) in patients with chronic kidney disease (CKD).                                                                                                                                                       | Chronic Kidney Disease                                                                                                      | Beta-blocker vs. Placebo                                                                                 | Total: 8 (6949)<br>Admissions data: Unclear (Unclear)     | No  | 5  | Treatment with beta-blockers improved all-cause mortality in patients with CKD and chronic systolic heart failure. There is insufficient evidence to conclude whether people with CKD who are not known to have heart failure derive benefit from beta-blockers.                                                                                                                                                                                                                                                              |
| Baigent, 2013, 1653    | The main objective was to characterise and quantify the cardiovascular and gastrointestinal risks of particular NSAID regimens among different types of patients, particularly those at increased risk of vascular disease.                                                                                              | Patients at increased risk of vascular disease                                                                              | Coxib vs. Placebo or another NSAID (diclofenac; ibuprofen; naproxen)                                     | Total: 634 (192981)<br>Admissions data: Unclear (Unclear) | Yes | 6  | The vascular risks of high-dose diclofenac, and possibly ibuprofen, are comparable to coxibs, whereas high-dose naproxen is associated with less vascular risk than other NSAIDs. Although NSAIDs increase vascular and gastrointestinal risks, the size of these risks can be predicted, which could help guide clinical decision making.                                                                                                                                                                                    |
| Barr, 2006, 548        | To determine the efficacy of tiotropium on clinical endpoints such as exacerbations and hospitalisations, symptom scales and pulmonary function compared to placebo and other bronchodilators used for stable COPD.                                                                                                      | Chronic Obstructive Pulmonary Disease                                                                                       | Tiotropium vs. Placebo; ipratropium bromide; long-acting $\beta_2$ -agonists (salmeterol or formoterol)  | Total: 9 (6584)<br>Admissions data: 4 (4087)              | Yes | 10 | Tiotropium reduced COPD exacerbations and related hospitalisations compared to placebo and ipratropium. It also improved health-related quality-of-life and symptom scores among patients with moderate and severe disease, and may have slowed decline in FEV1. Additional long-term studies are required to evaluate its effect on mortality and change in FEV1 to clarify its role in comparison to, or in combination with, long-acting $\beta_2$ -agonists and to assess its effectiveness in mild and very severe COPD. |
| Baumeister, 2011, 593  | To determine the effects of psychological and pharmacological interventions for depression in coronary artery disease patients with comorbid depressive disorder.                                                                                                                                                        | Coronary artery disease and comorbid depressive disorder                                                                    | Pharmacological intervention vs. Placebo; no intervention; usual care; other pharmacological medications | Total: 16 (unclear)<br>Admissions data: 4 (2995)          | No  | 11 | Psychological interventions and pharmacological interventions with SSRIs may have a small yet clinically meaningful effect on depression outcomes in CAD patients. No beneficial effects on the reduction of mortality rates and cardiac events were found. Overall, however, the evidence is sparse due to the low number of high quality trials per outcome and the heterogeneity of examined populations and interventions.                                                                                                |
| Beck, 2013, 615        | The purpose of this paper was to estimate the effectiveness of oral nutritional support compared with placebo or usual care in improving re-admissions, survival, nutritional status, functional status, quality of life and morbidity of older (65 years+) medical and surgical patients after discharge from hospital. | Older (65+) patients being discharged from the hospital to the community that are malnourished or at risk of malnourishment | Oral nutritional support vs. Placebo; usual care; standard care                                          | Total: 6 (716)<br>Admissions data: 4 (478)                | Yes | 5  | Although the evidence is limited, we suggest that oral nutritional support may be considered for older malnourished medical and surgical patients after discharge from hospital.                                                                                                                                                                                                                                                                                                                                              |
| Blitz, 2005, 813       | A systematic review of the literature was performed to examine the effect of inhaled MgSO4 in the treatment of patients with asthma exacerbations in the emergency department.                                                                                                                                           | Asthma                                                                                                                      | Nebulized magnesium sulfate vs. B2-agonist alone                                                         | Total: 6 (296)<br>Admissions data: 1 (52)                 | No  | 5  | The use of nebulized MgSO4, particularly in addition to a $\beta_2$ -agonist, in the treatment of an acute asthma exacerbation appears to produce benefits with respect to improved pulmonary function and may reduce the number of hospital admissions.                                                                                                                                                                                                                                                                      |
| Bonsu, 2016, 8729      | This study aims to compare lipophilic and hydrophilic statin therapy on clinical outcomes of heart failure (HF) using a systematic review and an adjusted indirect comparison meta-analysis.                                                                                                                             | Heart failure                                                                                                               | Lipophilic Statin vs. Placebo                                                                            | Total: 13 (10966)<br>Admissions data: 10 (10665)          | Yes | 9  | Lipophilic statin treatment shows significant decreases in all-cause mortality, cardiovascular mortality and hospitalization for worsening HF compared with rosuvastatin treatment. This meta-analysis provides preliminary evidence that lipophilic statins offer better clinical outcomes in HF till data from head to head comparisons are available.                                                                                                                                                                      |
| Briasoulis, 2015, 8731 | The present meta-analysis was designed to systematically evaluate prospective controlled trials and observational cohorts and assess the effects of carvedilol versus metoprolol types (succinate and tartrate) on all-cause mortality and rehospitalization.                                                            | Heart failure                                                                                                               | Carvedilol vs. Metoprolol                                                                                | Total: 4 (4776)<br>Admissions data: 2 (4544)              | No  | 6  | Neither all-cause mortality nor hospitalizations were significantly different between carvedilol and metoprolol succinate in the cohort studies. In conclusion, in patients with HFrEF, carvedilol and metoprolol succinate have similar effects in reducing all-cause mortality.                                                                                                                                                                                                                                             |

|                          |                                                                                                                                                                                                                                                                                                                                                                                                                                                                                    |                                                                                                             |                                                                                                                                                               |                                                   |     |    |                                                                                                                                                                                                                                                                                                                                                                                                                                                                                                                                                                                                                                                                                                                                                                                                                                                                                                                                           |
|--------------------------|------------------------------------------------------------------------------------------------------------------------------------------------------------------------------------------------------------------------------------------------------------------------------------------------------------------------------------------------------------------------------------------------------------------------------------------------------------------------------------|-------------------------------------------------------------------------------------------------------------|---------------------------------------------------------------------------------------------------------------------------------------------------------------|---------------------------------------------------|-----|----|-------------------------------------------------------------------------------------------------------------------------------------------------------------------------------------------------------------------------------------------------------------------------------------------------------------------------------------------------------------------------------------------------------------------------------------------------------------------------------------------------------------------------------------------------------------------------------------------------------------------------------------------------------------------------------------------------------------------------------------------------------------------------------------------------------------------------------------------------------------------------------------------------------------------------------------------|
| Brophy, 2001, 1021       | Congestive heart failure is an important cause of patient morbidity and mortality. Although several randomized clinical trials have compared beta-blockers with placebo for treatment of congestive heart failure, a meta-analysis quantifying the effect on mortality and morbidity has not been performed recently.                                                                                                                                                              | Congestive Heart Failure                                                                                    | Beta-blocker vs. Placebo                                                                                                                                      | Total: 22 (10132)<br>Admissions data: 22 (10076)  | No  | 4  | B-Blocker therapy is associated with clinically meaningful reductions in mortality and morbidity in patients with stable congestive heart failure and should be routinely offered to all patients similar to those included in trials.                                                                                                                                                                                                                                                                                                                                                                                                                                                                                                                                                                                                                                                                                                    |
| Burch, 2009, 1080        | The objective of this review is to evaluate the clinical effectiveness (including adverse events) and cost-effectiveness of antivirals for the treatment of naturally acquired influenza. This evaluation considers these issues for at-risk and otherwise healthy populations. It is important to note that this health technology assessment was carried out to address the use of antiviral treatments for influenza within the context of a seasonal outbreak, not a pandemic. | Influenza                                                                                                   | Zanamivir or oseltamivir vs. Placebo; antiviral drugs for treatment licensed in the UK (intravenous and nebulised zanamivir excluded); best symptomatic care. | Total: 34 (unclear)<br>Admissions data: 14 (5694) | No  | 8  | The clinical effectiveness data for population subgroups, used to inform the multiparameter evidence synthesis and cost-effectiveness modelling were, in places, limited and this should be borne in mind when interpreting the findings of this review. Trials were often not designed to determine clinical effectiveness in population subgroups and hence, although the direction of effect was clear, estimates of differences in symptom duration tended to be subject to greater uncertainty in subgroups. This limitation was more apparent for data on the rates of complications: studies with sample size and duration not designed to detect these outcomes resulted in low event rates and relatively weak evidence, even when available data were combined in meta-analyses. However, despite these concerns, the use of NIs in at-risk populations appeared to be a cost-effective approach to the treatment of influenza. |
| Cammarano, 2016, 8735    | The goal of this review was to pool data from ivabradine studies in all patients with stable CAD to compare cardiovascular and safety-related outcomes.                                                                                                                                                                                                                                                                                                                            | Stable coronary artery disease with and without left ventricular dysfunction                                | Ivabradine vs. Placebo                                                                                                                                        | Total: 3 (36524)<br>Admissions data: 3 (36524)    | Yes | 4  | Unselective use of ivabradine in patients with stable CAD is not supported by evidence and can be associated with new-onset atrial fibrillation, bradycardia, and drug-related nuisance adverse events.                                                                                                                                                                                                                                                                                                                                                                                                                                                                                                                                                                                                                                                                                                                                   |
| Campschroer, 2014, 1164  | This review aimed to answer the following question: does medical treatment with alpha-blockers compared to other pharmacotherapy or placebo impact on stone clearance rate, in adult patients presenting with symptoms of ureteral stones less than 10 mm confirmed by imaging? Other clinically relevant outcomes such as stone expulsion time, hospitalisation, pain scores, analgesic use and adverse effects have also been explored.                                          | Ureteral stones                                                                                             | Alpha-blocker vs. Any other pharmacotherapy including: standard therapy (e.g. NSAIDs, corticosteroids); calcium channel blockers; placebo.                    | Total: 30 (6155)<br>Admissions data: 4 (313)      | No  | 10 | The use of alpha-blockers in patients with ureteral stones results in a higher stone-free rate and a shorter time to stone expulsion. Alpha-blockers should therefore be offered as part of medical expulsive therapy as one of the primary treatment modalities.                                                                                                                                                                                                                                                                                                                                                                                                                                                                                                                                                                                                                                                                         |
| Cates, 2013, 1249        | To assess the effects of holding chambers (spacers) compared to nebulisers for the delivery of beta-agonists for acute asthma.                                                                                                                                                                                                                                                                                                                                                     | Asthma                                                                                                      | Treatment with beta2-agonists via Spacer (chamber) vs. Treatment with beta2-agonists via nebuliser (multiple-treatment studies)                               | Total: 39 (2626)<br>Admissions data: 9 (582)      | Yes | 9  | Nebuliser delivery produced outcomes that were not significantly better than metered-dose inhalers delivered by spacer in adults or children, in trials where treatments were repeated and titrated to the response of the participant. Spacers may have some advantages compared to nebulisers for children with acute asthma. The studies excluded people with life-threatening asthma; therefore, the results of this meta-analysis should not be extrapolated to this patient population.                                                                                                                                                                                                                                                                                                                                                                                                                                             |
| Cawood, 2012, 1264       | Therefore, this systematic review was undertaken to examine whether high protein ONS have beneficial effects in clinical practice and the extent to which these are associated with increased protein intake.                                                                                                                                                                                                                                                                      | Patients in hospital or community settings that are malnourished or at risk of disease-related malnutrition | High protein oral nutritional supplements vs. Placebo or usual care                                                                                           | Total: 36 (3790)<br>Admissions data: 2 (525)      | No  | 7  | The systematic review and meta-analysis provides evidence that high protein supplements produce clinical benefits, with economic implications.                                                                                                                                                                                                                                                                                                                                                                                                                                                                                                                                                                                                                                                                                                                                                                                            |
| Ceron-Litvoc, 2009, 1281 | This paper reports a systematic review and meta-analysis of all randomized controlled trials (RCTs) that evaluate the use of carbamazepine in acute and maintenance phases of BD compared to lithium.                                                                                                                                                                                                                                                                              | Bipolar disorder 1 and 2                                                                                    | Maintenance treatment with carbamazepine vs. Carbamazepine                                                                                                    | Total: 15 (unclear)<br>Admissions data: 2 (202)   | No  | 5  | Conclusion This review suggests that carbamazepine might be comparable to lithium in terms of efficacy and safety, and therefore a valuable option in the treatment of both manic and maintenance phases.                                                                                                                                                                                                                                                                                                                                                                                                                                                                                                                                                                                                                                                                                                                                 |

|                     |                                                                                                                                                                                                                                                                                                                                                                                                                                                                                                                                                                                                               |                                                       |                                                                                                                          |                                                 |     |    |                                                                                                                                                                                                                                                                                                                                                                                                                                                                                                                                                                                                                                                                                                                                                                                                                                                                                                                                                                                                                                                                  |
|---------------------|---------------------------------------------------------------------------------------------------------------------------------------------------------------------------------------------------------------------------------------------------------------------------------------------------------------------------------------------------------------------------------------------------------------------------------------------------------------------------------------------------------------------------------------------------------------------------------------------------------------|-------------------------------------------------------|--------------------------------------------------------------------------------------------------------------------------|-------------------------------------------------|-----|----|------------------------------------------------------------------------------------------------------------------------------------------------------------------------------------------------------------------------------------------------------------------------------------------------------------------------------------------------------------------------------------------------------------------------------------------------------------------------------------------------------------------------------------------------------------------------------------------------------------------------------------------------------------------------------------------------------------------------------------------------------------------------------------------------------------------------------------------------------------------------------------------------------------------------------------------------------------------------------------------------------------------------------------------------------------------|
| Chauhan, 2012, 1348 | 1. To compare the safety and efficacy of daily oral antileukotrienes with that of inhaled corticosteroids; 2. to determine the dose of inhaled corticosteroids equivalent to the effect of anti-leukotrienes in the management of asthma in adults and children; and 3. to explore different factors such as patients' age group, disease severity, anti-leukotriene used, intervention duration, hydrofluoroalkane-propelled beclomethasone or equivalent (HFA-BDP eq) dose of inhaled corticosteroids, methodological quality, publication status and funding that could influence the magnitude of effect. | Asthma                                                | Anti-leukotriene vs. Inhaled glucocorticoids (in hydrofluorocarbon-beclomethasone dipropionate equivalent)               | Total: 56 (13338)<br>Admissions data: 12 (2715) | No  | 11 | As monotherapy, inhaled corticosteroids display superior efficacy to anti-leukotrienes in adults and children with persistent asthma; the superiority is particularly marked in patients with moderate airway obstruction. On the basis of efficacy, the results support the current guidelines' recommendation that inhaled corticosteroids remain the preferred monotherapy.                                                                                                                                                                                                                                                                                                                                                                                                                                                                                                                                                                                                                                                                                   |
| Chauhan, 2014, 8681 | To compare the safety and efficacy of adding LABA versus LTRA in children and adults with asthma who remain symptomatic in spite of regular treatment with ICS. We specifically wished to examine the relative impact of the two agents on asthma exacerbations, lung function, symptoms, quality of life, adverse health events and withdrawals.                                                                                                                                                                                                                                                             | Asthma treated with inhaled corticosteroids           | Long acting beta agonists with inhaled corticosteroids vs. Leukotriene receptor antagonists plus inhaled corticosteroids | Total: 18 (7126)<br>Admissions data: 5 (4345)   | No  | 9  | In adults with asthma that is inadequately controlled by predominantly low-dose ICS with significant bronchodilator reversibility, the addition of LABA to ICS is modestly superior to the addition of LTRA in reducing oral corticosteroid-treated exacerbations, with an absolute reduction of two percentage points. Differences favouring LABA over LTRA as adjunct therapy were observed in lung function and, to a lesser extent, in rescue medication use, symptoms and quality of life. The lower overall withdrawal rate and the higher proportion of participants satisfied with their therapy indirectly favour the combination of LABA + ICS over LTRA + ICS. Evidence showed a slightly increased risk of SAE with LABA compared with LTRA, with an absolute increase of one percentage point. Our findings modestly support the use of a single inhaler for the delivery of both LABA and low- or medium-dose ICS. Because of the paucity of paediatric trials, we are unable to draw firm conclusions about the best adjunct therapy in children. |
| Chen, 2015, 8742    | We aimed to summarize the evidence for the efficacy of MRAs in patients with either heart failure with PEF (HF-PEF) or myocardial infarction with PEF (MI-PEF).                                                                                                                                                                                                                                                                                                                                                                                                                                               | Patients with preserved ejection fraction $\geq 40\%$ | Aldosterone antagonists vs. Placebo or control                                                                           | Total: 14 (6428)<br>Admissions data: 4 (4551)   | Yes | 8  | MRA treatment in PEF patients led to reduced hospitalization for heart failure, quantifiable improvements in quality of life and diastolic function, and reversal of cardiac remodeling, but did not provide any all-cause mortality benefit.                                                                                                                                                                                                                                                                                                                                                                                                                                                                                                                                                                                                                                                                                                                                                                                                                    |
| Cheyne, 2012, 8744  | To compare the relative effects of tiotropium to ipratropium bromide on markers of quality of life, exacerbations, symptoms, lung function and serious adverse events in patients with COPD using available randomised controlled trial data.                                                                                                                                                                                                                                                                                                                                                                 | Chronic obstructive pulmonary disease                 | Tiotropium vs. Ipratropium bromide                                                                                       | Total: 2 (1073)<br>Admissions data: 2 (1073)    | No  | 10 | This review shows that tiotropium treatment, when compared with ipratropium bromide, was associated with improved lung function, fewer hospital admissions (including those for exacerbations of COPD), fewer exacerbations of COPD and improved quality of life. There were both fewer serious adverse events and disease specific events in the tiotropium group, but no significant difference in deaths with ipratropium bromide when compared to tiotropium. Thus, tiotropium appears to be a reasonable choice (instead of ipratropium bromide) for patients with stable COPD, as proposed in guidelines. A recent large double-blind trial of the two delivery devices found no substantial difference in mortality using 2.5 $\mu\text{g}$ or 5 $\mu\text{g}$ of tiotropium via Respimat in comparison to 18 $\mu\text{g}$ via Handihaler.                                                                                                                                                                                                               |
| Chong, 2012, 1438   | To compare the relative clinical effects of tiotropium bromide alone versus LABA alone, upon measures of quality of life, exacerbations, lung function and serious adverse events, in people with stable COPD. To critically appraise and summarise current evidence on the costs and cost-effectiveness associated with tiotropium compared to LABA in people with COPD.                                                                                                                                                                                                                                     | Chronic obstructive pulmonary disease                 | Tiotropium vs. Long acting beta-agonists                                                                                 | Total: 7 (12223)<br>Admissions data: 6 (12123)  | No  | 10 | In people with COPD, the evidence is equivocal as to whether or not tiotropium offers greater benefit than LABAs in improving quality of life; however, this is complicated by differences in effect among the LABA types. Tiotropium was more effective than LABAs as a group in preventing COPD exacerbations and disease-related hospitalisations, although there were no statistical differences between groups in overall hospitalisation rates or mortality during                                                                                                                                                                                                                                                                                                                                                                                                                                                                                                                                                                                         |

|                            |                                                                                                                                                                                                                          |                                                                   |                                                                                                                                                          |                                                |     |   |                                                                                                                                                                                                                                                                                                                                                                                                                                                                                                                                                                                                                                                                                                                                                                                                                                                                                             |
|----------------------------|--------------------------------------------------------------------------------------------------------------------------------------------------------------------------------------------------------------------------|-------------------------------------------------------------------|----------------------------------------------------------------------------------------------------------------------------------------------------------|------------------------------------------------|-----|---|---------------------------------------------------------------------------------------------------------------------------------------------------------------------------------------------------------------------------------------------------------------------------------------------------------------------------------------------------------------------------------------------------------------------------------------------------------------------------------------------------------------------------------------------------------------------------------------------------------------------------------------------------------------------------------------------------------------------------------------------------------------------------------------------------------------------------------------------------------------------------------------------|
|                            |                                                                                                                                                                                                                          |                                                                   |                                                                                                                                                          |                                                |     |   | the study periods. There were fewer serious adverse events and study withdrawals recorded with tiotropium compared with LABAs. Symptom improvement and changes in lung function were similar between the treatment groups. Given the small number of studies to date, with high levels of heterogeneity among them, one approach may be to give a COPD patient a substantial trial of tiotropium, followed by a LABA (or vice versa), then to continue prescribing the long-acting bronchodilator that the patient prefers. Further studies are needed to compare tiotropium with different LABAs, which are currently ongoing. The available economic evidence indicates that tiotropium may be cost-effective compared with salmeterol in several specific settings, but there is considerable uncertainty around this finding.                                                           |
| Coeytaux, 2014, 8747       | We conducted a systematic review to evaluate the comparative effectiveness and safety of monotherapy or combination therapy for PAH using endothelin receptor antagonists, phosphodiesterase inhibitors, or prostanoids. | Pulmonary arterial hypertension                                   | Combination drug therapy with endothelin receptor antagonist, phosphodiesterase inhibitors, and/or prostanoids vs. Placebo; Monotherapy                  | Total: 28 (3613)<br>Admissions data: 9 (1918)  | No  | 5 | Although no studies were powered to detect a mortality reduction, monotherapy was associated with improved 6MWD and reduced hospitalization rates. Our findings also suggest an improvement in 6MWD when a second drug is added to monotherapy.                                                                                                                                                                                                                                                                                                                                                                                                                                                                                                                                                                                                                                             |
| Cordina, 2005, 1606        | To assess the effects of pharmacological cardioversion of atrial fibrillation in adults on the annual risk of stroke, peripheral embolism, and mortality.                                                                | Paroxysmal, sustained or permanent atrial fibrillation or flutter | Rhythm (antiarrhythmic drugs) vs. Rate control (rate control drugs)                                                                                      | Total: 2 (4167)<br>Admissions data: 2 (4312)   | No  | 8 | There is no evidence that pharmacological cardioversion of atrial fibrillation to sinus rhythm is superior to rate control. Rhythm control is associated with more adverse effects and increased hospitalisation. It does not reduce the risk of stroke. The conclusions cannot be generalised to all people with atrial fibrillation. Most of the patients included in these studies were relatively older (>60 years) with significant cardiovascular risk factors.                                                                                                                                                                                                                                                                                                                                                                                                                       |
| Costa, 2013, 1629          | To evaluate patients with IBD treated with infliximab and providing data on the rate of complications (hospitalizations and/or surgery).                                                                                 | Irritable bowel disease                                           | Infliximab vs. Placebo; no treatment; other active non-biologic drug, non-adherence to infliximab therapy and episodic/nonpersistence infliximab therapy | Total: 9 (1912)<br>Admissions data: 6 (1736)   | No  | 8 | The best evidence available points toward a reduction of the risk of hospitalization and major surgery requirement in patients with IBD treated with infliximab. This impact is clinically and economically relevant because hospitalization and surgery are considered to be markers of disease severity and significantly contribute to the total direct costs associated with IBD.                                                                                                                                                                                                                                                                                                                                                                                                                                                                                                       |
| Danchin, 2006, 1752        | To provide information complementary to that provided by previous meta-analyses in patients who have CAD and either signs of heart failure or impaired systolic function                                                 | Stable coronary artery disease                                    | Angiotensin-converting enzyme inhibitors vs. Placebo                                                                                                     | Total: 7 (33960)<br>Admissions data: 6 (33500) | No  | 8 | Angiotensin-converting enzyme inhibitors reduce total mortality and major cardiovascular end points in patients who have CAD and no left ventricular systolic dysfunction or heart failure.                                                                                                                                                                                                                                                                                                                                                                                                                                                                                                                                                                                                                                                                                                 |
| DiNicolantonio, 2013, 1991 | To compare carvedilol against the most frequently prescribed b1-selective BBs.                                                                                                                                           | Acute myocardial infarction (AMI) and heart failure (HF)          | Carvedilol vs. Beta-blockers                                                                                                                             | Total: 8 (4563)<br>Admissions data: 2 (3099)   | Yes | 5 | Compared to b1-selective BBs used in HF (8 trials, n [ 4,563), carvedilol significantly reduced all-cause mortality (risk ratio 0.85, 95% confidence interval 0.78 to 0.93, p [ 0.0006). In 3 trials of patients with AMI (n [ 644), carvedilol significantly reduced all-cause mortality by 45% (fixed-effects model: risk ratio 0.55, 95% confidence interval 0.32 to 0.94, p [ 0.03, random-effects model: risk ratio 0.56, 95% confidence interval 0.26 to 1.12, p = 0.10), with no reduction in non-fatal MI (risk ratio 0.61, 95% confidence interval 0.31 to 1.22, p [ 0.16). In conclusion, carvedilol, as compared against atenolol, bisoprolol, metoprolol and nebivolol in randomized direct comparison trials, significantly reduced all-cause mortality in systolic HF patients. Additionally, carvedilol significantly reduced all-cause mortality compared with b1-selective |

|                      |                                                                                                                                                                                                                                                                                                                               |                                                     |                                                                                                          |                                                  |     |    |                                                                                                                                                                                                                                                                                                                                                                                                                                                                                                                                                                                                                                                                                                                                                                                                                                                                                                                                                                                                                                                    |
|----------------------|-------------------------------------------------------------------------------------------------------------------------------------------------------------------------------------------------------------------------------------------------------------------------------------------------------------------------------|-----------------------------------------------------|----------------------------------------------------------------------------------------------------------|--------------------------------------------------|-----|----|----------------------------------------------------------------------------------------------------------------------------------------------------------------------------------------------------------------------------------------------------------------------------------------------------------------------------------------------------------------------------------------------------------------------------------------------------------------------------------------------------------------------------------------------------------------------------------------------------------------------------------------------------------------------------------------------------------------------------------------------------------------------------------------------------------------------------------------------------------------------------------------------------------------------------------------------------------------------------------------------------------------------------------------------------|
| Doyle, 2009, 2055    | Investigated the effects of long-term amiodarone therapy on mortality, rhythm control, incidence of hospitalization, and drug intolerance leading to withdrawal of treatment in patients with persistent AF of more than 30 days' duration.                                                                                   | Persistent atrial fibrillation (>30 days' duration) | Amiodarone vs. CALCIUM CHANNEL BLOCKERS; CARDIAC THERAPY; BETA BLOCKING AGENTS                           | Total: 20 (5060)<br>Admissions data: 5 (2932)    | No  | 8  | Amiodarone, as part of a strategy to achieve and maintain sinus rhythm, appears to be safe and effective in patients with persistent AF. However, some patients may not tolerate the adverse effects of this agent.                                                                                                                                                                                                                                                                                                                                                                                                                                                                                                                                                                                                                                                                                                                                                                                                                                |
| Ducharme, 2010, 2095 | To compare the relative benefit and safety profile of the combination of long-acting $\beta_2$ agonists (LABAs) and inhaled corticosteroids (ICS) with a higher dose of inhaled corticosteroids in asthmatic patients with or without previous treatment with inhaled corticosteroids.                                        | Recurrent or chronic asthma                         | Long-acting beta2-agonists and inhaled corticosteroids vs. Higher dose of inhaled corticosteroids        | Total: 48 (15155)<br>Admissions data: 33 (12573) | No  | 11 | In adolescents and adults with sub-optimal control on low dose ICS monotherapy, the combination of LABA and ICS is modestly more effective in reducing the risk of exacerbations requiring oral corticosteroids than a higher dose of ICS. Combination therapy also led to modestly greater improvement in lung function, symptoms and use of rescue $\beta_2$ agonists and to fewer withdrawals due to poor asthma control than with a higher dose of inhaled corticosteroids. Apart from an increased rate of tremor and less oral candidiasis with combination therapy, the two options appear relatively safe in adults although adverse effects associated with long-term ICS treatment were seldommonitored. In children, combination therapy did not lead to a significant reduction, but rather a trend towards an increased risk, of oral steroid-treated exacerbations and hospital admissions. These trends raised concern about the safety of combination therapy in view of modest improvement in children under the age of 12 years. |
| Ebell, 2013, 2148    | To determine the effect of oseltamivir on the duration of illness and prevention of serious complications and hospitalizations in adults using both published and unpublished data, by a group of authors with no ties to the manufacturer and considering an appropriate definition for complications requiring antibiotics. | Influenza                                           | Oseltamivir vs. Placebo                                                                                  | Total: 11 (4769)<br>Admissions data: 8 (4327)    | Yes | 9  | There is no evidence that oseltamivir reduces the likelihood of hospitalization, pneumonia or the combined outcome of pneumonia, otitis media and sinusitis in the ITT population.                                                                                                                                                                                                                                                                                                                                                                                                                                                                                                                                                                                                                                                                                                                                                                                                                                                                 |
| Edmonds, 2012, 2158  | To determine the effectiveness of Inhaled CorticoSteroids on outcomes in the treatment of acute asthma following discharge from the ED. To quantify the effectiveness of ICS therapy on acute asthma following ED discharge, when used in addition to, or as a substitute for, systemic corticosteroids                       | Acute asthma                                        | Any inhaled corticosteroids plus oral corticosteroid vs. Placebo or standard oral corticosteroid therapy | Total: 12 (2205)<br>Admissions data: 5 (1059)    | No  | 9  | There is insufficient evidence that ICS therapy provides additional benefit when used in combination with standard systemic corticosteroid therapy upon ED discharge for acute asthma. There is some evidence that high-dose ICS therapy alone may be as effective as oral corticosteroid therapy when used in mild asthmatics upon ED discharge; however, the confidence intervals were too wide to be confident of equal effectiveness. Further research is needed to clarify whether ICS therapy should be employed in acute asthma treatment following ED discharge. The review does not suggest any reason to stop usual treatment with ICS following ED discharge, even if a course of oral corticosteroids are prescribed.                                                                                                                                                                                                                                                                                                                  |
| Edmonds, 2012, 2159  | To determine the benefit of ICS for the treatment of patients with acute asthma managed in the emergency department (ED).                                                                                                                                                                                                     | Acute asthma                                        | Early use of inhaled corticosteroids in the emergency department vs. Placebo or systemic corticosteroids | Total: 32 (2374)<br>Admissions data: 5 (377)     | Yes | 9  | ICS therapy reduces hospital admissions in patients with acute asthma who are not treated with oral or intravenous corticosteroids. They may also reduce admissions when they are used in addition to systemic corticosteroids; however, the most recent evidence is conflicting. There is insufficient evidence that ICS therapy results in clinically important changes in pulmonary function or clinical scores when used in acute asthma in addition to systemic corticosteroids. Also, there is insufficient evidence that ICS therapy can be used in place of systemic corticosteroid therapy when treating acute asthma. Further research is needed to clarify the most appropriate drug dosage and delivery device, and to define which patients are most likely to benefit from ICS therapy. Use of similar measures and reporting methods of lung                                                                                                                                                                                        |



|                       |                                                                                                                                                                                                                                                             |                                                                     |                                                                                                                                                       |                                                |     |    |                                                                                                                                                                                                                                                                                                                                                                                                                                                                                                                                                                                                                                                                                                                                                                                                                                                                                                                                                                                                                                             |
|-----------------------|-------------------------------------------------------------------------------------------------------------------------------------------------------------------------------------------------------------------------------------------------------------|---------------------------------------------------------------------|-------------------------------------------------------------------------------------------------------------------------------------------------------|------------------------------------------------|-----|----|---------------------------------------------------------------------------------------------------------------------------------------------------------------------------------------------------------------------------------------------------------------------------------------------------------------------------------------------------------------------------------------------------------------------------------------------------------------------------------------------------------------------------------------------------------------------------------------------------------------------------------------------------------------------------------------------------------------------------------------------------------------------------------------------------------------------------------------------------------------------------------------------------------------------------------------------------------------------------------------------------------------------------------------------|
|                       |                                                                                                                                                                                                                                                             |                                                                     |                                                                                                                                                       |                                                |     |    | function, and a common, validated, clinical score would be helpful in future versions of this meta-analysis.                                                                                                                                                                                                                                                                                                                                                                                                                                                                                                                                                                                                                                                                                                                                                                                                                                                                                                                                |
| Ezekowitz, 2009, 2304 | To summarize the evidence on the efficacy of spironolactone (SP), eplerenone (EP), or canrenoate (CAN) in patients with left ventricular dysfunction.                                                                                                       | Left ventricular dysfunction (heart failure, myocardial infarction) | Aldosterone antagonists vs. Placebo or usual care or active comparator (metoprolol or ramipril)                                                       | Total: 19 (10807)<br>Admissions data: 9 (8699) | No  | 6  | We demonstrated a 20% reduction in all-cause mortality with the use of aldosterone blockade in a clinically heterogeneous group of clinical trial participants with heart failure and post-MI. In addition, we found a 3.1% improvement in EF. Further study in those with less severe symptoms or preserved systolic function is warranted.                                                                                                                                                                                                                                                                                                                                                                                                                                                                                                                                                                                                                                                                                                |
| Farne, 2015, 8767     | To compare the relative effects on markers of quality of life, exacerbations, symptoms, lung function and serious adverse events in people with COPD randomised to LABA plus tiotropium versus tiotropium alone; or LABA plus tiotropium versus LABA alone. | Chronic obstructive pulmonary disease                               | Long-acting beta2-agonists (LABA) plus tiotropium vs. Tiotropium or long-acting beta2-agonist alone                                                   | Total: 10 (10894)<br>Admissions data: 4 (4856) | Yes | 10 | The results from this review indicated a small mean improvement in health-related quality of life and FEV1 for participants on a combination of tiotropium and LABA compared to either agent alone, and this translated into a small increase in the number of responders on combination treatment. In addition, adding tiotropium to LABA reduced exacerbations, although adding LABA to tiotropium did not. Hospital admission and mortality were not altered by adding LABA to tiotropium, although there may not be enough data. While it is possible that this is affected by higher attrition in the tiotropium group, one would expect that participants withdrawn from the study would have had less favourable outcomes; this means that the expected direction of attrition bias would be to reduce the estimated benefit of the combination treatment. The results were largely from studies of olodaterol and there was insufficient information to assess whether the other LABAs were equivalent to olodaterol or each other. |
| Filippini, 2003, 2402 | To find out whether recombinant interferons reduced the number of patients who had clinical exacerbations and disease progression, compared with placebo.                                                                                                   | Multiple sclerosis                                                  | Interferons vs. Placebo                                                                                                                               | Total: 7 (1215)<br>Admissions data: 2 (391)    | No  | 7  | Recombinant interferons slightly reduce the number of patients who have exacerbations during first year of treatment. Their clinical effect beyond 1 year is uncertain and new trials are needed to assess their long-term effectiveness and side-effects.                                                                                                                                                                                                                                                                                                                                                                                                                                                                                                                                                                                                                                                                                                                                                                                  |
| Fisher, 2014, 8769    | The critical evaluation of clinical evidence on the safety and efficacy of autologous adult bone marrow-derived stemcells (BMSC) as a treatment for chronic ischaemic heart disease (IHD) and heart failure.                                                | Chronic ischaemic heart disease and congestive heart failure        | Bone marrow stem cells vs. No intervention or a placebo                                                                                               | Total: 23 (1255)<br>Admissions data: 5 (402)   | No  | 11 | This systematic review and meta-analysis found moderate quality evidence that BMSC treatment improves LVEF. Unlike in trials where BMSC were administered following acute myocardial infarction (AMI), we found some evidence for a potential beneficial clinical effect in terms of mortality and performance status in the long term (after at least one year) in people who suffer from chronic IHD and heart failure, although the quality of evidence was low.                                                                                                                                                                                                                                                                                                                                                                                                                                                                                                                                                                         |
| Fisher, 2015, 8770    | To assess available clinical evidence on the safety and efficacy of cell-based therapies for HF.                                                                                                                                                            | Heart failure                                                       | Bone marrow stem cells vs. No intervention or placebo                                                                                                 | Total: 31 (1521)<br>Admissions data: 11 (574)  | Yes | 7  | This study shows evidence that autologous cell therapy may be beneficial for patients having HF, but further evidence is required.                                                                                                                                                                                                                                                                                                                                                                                                                                                                                                                                                                                                                                                                                                                                                                                                                                                                                                          |
| Fisher, 2015, 8771    | To determine the safety and efficacy of autologous adult bone marrow stem cells as a treatment for acute myocardial infarction (AMI), focusing on clinical outcomes.                                                                                        | Acute myocardial infarction                                         | Autologous adult bone marrow-derived cells following successful revascularisation by angioplasty or cardiac surgery vs. No intervention or placebo    | Total: 41 (2732)<br>Admissions data: 13 (1194) | No  | 11 | The results of this review suggest that there is insufficient evidence for a beneficial effect of cell therapy for AMI patients. However, most of the evidence comes from small trials that showed no difference in clinically relevant outcomes. Further adequately powered trials are needed and until then the efficacy of this intervention remains unproven.                                                                                                                                                                                                                                                                                                                                                                                                                                                                                                                                                                                                                                                                           |
| Fox, 2011, 2496       | To examine whether combination therapy is more efficacious than monotherapy therapy for treatment of pulmonary artery hypertension.                                                                                                                         | Pulmonary arterial hypertension (PAH)                               | Combination therapy (Tadalafil and Bosentan; INH treprostinil and Bosentan or sildenafil; Sildenafil and Epoprostenol; INH iloprost and Bosentan) vs. | Total: 6 (729)<br>Admissions data: 5 (634)     | No  | 5  | CT did not decrease the combined end point of mortality, admission for worsening PAH, lung transplantation, or escalation of PAH therapy (RR 0.42, 95% CI 0.17 to 1.04). In conclusion, this meta-analysis suggests that in PAH CT does not offer an advantage over MT apart from modestly increasing exercise capacity. However,                                                                                                                                                                                                                                                                                                                                                                                                                                                                                                                                                                                                                                                                                                           |

|                      |                                                                                                                                                                                                                                                    |                                                                                                                           |                                                                                                                                                                               |                                               |     |    |                                                                                                                                                                                                                                                                                                                                                                                                                                                                                                                                                                      |
|----------------------|----------------------------------------------------------------------------------------------------------------------------------------------------------------------------------------------------------------------------------------------------|---------------------------------------------------------------------------------------------------------------------------|-------------------------------------------------------------------------------------------------------------------------------------------------------------------------------|-----------------------------------------------|-----|----|----------------------------------------------------------------------------------------------------------------------------------------------------------------------------------------------------------------------------------------------------------------------------------------------------------------------------------------------------------------------------------------------------------------------------------------------------------------------------------------------------------------------------------------------------------------------|
|                      |                                                                                                                                                                                                                                                    |                                                                                                                           | Placebo (Monotherapy when combined with co-intervention)                                                                                                                      |                                               |     |    | given the paucity of good-quality data, more studies are required to define the efficacy of CT in this population before establishing final guidelines.                                                                                                                                                                                                                                                                                                                                                                                                              |
| Fu, 2012, 2549       | The aim of this meta-analysis was to assess the efficacy of ACE inhibitors in HFPEF patients, based on the results of the most recently published prospective studies.                                                                             | Heart failure with preserved left ventricular ejection fraction defined as signs or symptoms of heart failure and EF≥40%) | Angiotensin converting enzyme inhibitor vs. Placebo or 'other classes of drugs such as monotherapy or first line therapy' for heart failure with preserved ejection fraction. | Total: 7 (2554)<br>Admissions data: 4 (1803)  | No  | 7  | In patients with chronic heart failure with preserved ejection fraction, ACE inhibitors reduced all-cause mortality without affecting mortality due to heart failure and any-cause rehospitalization.                                                                                                                                                                                                                                                                                                                                                                |
| Gandhi, 2014, 2599   | We have performed a systematic review of studies assessing the efficacy of HSS in combination with furosemide for the treatment of acute advanced CHF.                                                                                             | Heart Failure                                                                                                             | Hypertonic saline and furosemide vs. Furosemide alone                                                                                                                         | Total: 10 (2845)<br>Admissions data: 4 (1012) | Yes | 8  | The results of this meta-analysis demonstrate that in patients with advanced CHF concomitant hypertonic saline administration improved weight loss, preserved renal function, and decreased length of hospitalization, mortality and heart failure rehospitalization. Pending further validation, there is promise for hypertonic saline as an advanced therapy for the management of acute advanced CHF.                                                                                                                                                            |
| Gao, 2014, 8775      | We conducted a systematic review and meta-analysis to evaluate the impacts of macrolides on the number of bronchiectasis exacerbations and other clinical measures, i.e. admission for exacerbations, QoL, spirometric indices and adverse events. | Non-cystic fibrosis bronchiectasis                                                                                        | Macrolide vs. Placebo                                                                                                                                                         | Total: 9 (559)<br>Admissions data: 2 (224)    | No  | 6  | Macrolide maintenance therapy, both in adults and children, was effective and safe in reducing bronchiectasis exacerbations, but not the admissions for exacerbations. In addition, macrolide administration in adults was associated with improvement in QoL and spirometry, but not 6WMT. Future studies are warranted to verify the optimal populations and clarify its potential effects on antimicrobial resistance.                                                                                                                                            |
| Garside, 2007, 2640  | To establish the effectiveness and cost-effectiveness of cinacalcet for the treatment of SHPT for people on dialysis due to ESRD.                                                                                                                  | Hyperparathyroidism secondary to ESRD                                                                                     | Cinacalcet vs. Placebo or 'standard care', which may include: phosphate binders, vitamin D and/or parathyroidectomy                                                           | Total: 7 (846)<br>Admissions data: 4 (1184)   | No  | 10 | Cinacalcet in addition to standard care is more effective than placebo plus standard care at reducing PTH levels without compromising calcium levels. However, there is limited information about the impact of this reduction on patient-relevant clinical outcomes. Given the short follow-up in the trials, it is unclear how data should be extrapolated to the long term.                                                                                                                                                                                       |
| Grimwade, 2003, 2933 | To assess the effects of routinely administered cotrimoxazole on death and illness episodes in HIV infected adults.                                                                                                                                | Human immunodeficiency virus                                                                                              | Cotrimoxazole vs. Placebo or usual treatment                                                                                                                                  | Total: 4 (1476)<br>Admissions data: 3 (764)   | No  | 9  | In the trials included in the review, cotrimoxazole prophylaxis had a beneficial effect in preventing death and illness episodes in adults with both early and advanced HIV disease. However, the wider applicability of these findings is unclear, in particular to areas with higher background bacterial resistance to cotrimoxazole. Further trials would be required in differing settings to widen applicability.                                                                                                                                              |
| Grooten, 2015, 8780  | The aim of the present systematic review and meta-analysis is to summarize the available evidence on the effectiveness of CCS therapy for HG.                                                                                                      | Pregnant women with hyperemesis gravidarum                                                                                | Corticosteroids (Prednisolone; Methylprednisolone; Hydrocortisone) vs. Prevailing treatment or a placebo                                                                      | Total: 5 (310)<br>Admissions data: 4 (214)    | No  | 7  | Meta-analysis yielded no effect of CCS therapy on readmission rates. Single small studies indicated possible beneficial effects on other outcomes. Future high-quality trials are necessary and would benefit from consensus on HG definition and core outcomes of HG therapy.                                                                                                                                                                                                                                                                                       |
| Hemkens, 2016, 8784  | To evaluate potential cardiovascular benefits and harms of a continuous long-term treatment with colchicine in any population, and specifically in people with high cardiovascular risk.                                                           | Any condition or disease                                                                                                  | Colchicine vs. Placebo, inactive control, or active control                                                                                                                   | Total: 39 (4992)<br>Admissions data: 2 (599)  | No  | 11 | Overall, we found that further research would probably change our assessment of the benefits and harms of colchicine. Our findings should therefore be interpreted with caution. However, new treatments in heart diseases are urgently needed. Although there is much uncertainty around the benefits and harms of colchicine treatment, it may be associated with cardiovascular benefits, especially on myocardial infarction. We therefore think that large high-quality clinical trials should be conducted to further investigate colchicine in heart disease. |

|                       |                                                                                                                                                                                                                                                                                                                                                                                                                                                                |                                                            |                                                                                                                                                       |                                                  |     |    |                                                                                                                                                                                                                                                                                                                                                                                                                                                                                                                                                                                                                                                                                                                                                                                                                                                                                                                                                                                                      |
|-----------------------|----------------------------------------------------------------------------------------------------------------------------------------------------------------------------------------------------------------------------------------------------------------------------------------------------------------------------------------------------------------------------------------------------------------------------------------------------------------|------------------------------------------------------------|-------------------------------------------------------------------------------------------------------------------------------------------------------|--------------------------------------------------|-----|----|------------------------------------------------------------------------------------------------------------------------------------------------------------------------------------------------------------------------------------------------------------------------------------------------------------------------------------------------------------------------------------------------------------------------------------------------------------------------------------------------------------------------------------------------------------------------------------------------------------------------------------------------------------------------------------------------------------------------------------------------------------------------------------------------------------------------------------------------------------------------------------------------------------------------------------------------------------------------------------------------------|
| Heran, 2012, 3275     | To assess the benefit and harm of ARBs compared with ACE inhibitors (ACEIs) or placebo on mortality, morbidity and withdrawals due to adverse effects in patients with symptomatic HF and left ventricular systolic dysfunction or preserved systolic function.                                                                                                                                                                                                | Heart failure with and without preserved ejection fraction | Angiotensin II receptor blocker with or without angiotensin converting enzyme inhibitor vs. Placebo, in addition to standard therapy (ACE-inhibitors) | Total: 24 (25051)<br>Admissions data: 9 (14337)  | Yes | 10 | (? Monotherapy; - dual therapy)In patients with symptomatic HF and systolic dysfunction or with preserved ejection fraction, ARBs compared to placebo or ACEIs do not reduce total mortality or morbidity Adding an ARB in combination with an ACEI does not reduce total mortality or total hospital admission but increases withdrawals due to adverse effects compared with ACEI alone.                                                                                                                                                                                                                                                                                                                                                                                                                                                                                                                                                                                                           |
| Hood, 2014, 3415      | To examine the effectiveness of digitalis glycosides in treating HF in patients with normal sinus rhythm. To examine the effects of digitalis in patients taking diuretics and angiotensin-converting enzyme inhibitors; in patients with varying severity and duration of disease; in patients with prior exposure to digitalis versus no prior exposure; and in patients with "HF due to systolic dysfunction" versus "HF with preserved ejection fraction." | Heart failure                                              | Digitalis (digoxin or digitoxin) vs. Placebo                                                                                                          | Total: 13 (7896)<br>Admissions data: 4 (7262)    | Yes | 7  | The literature indicates that digitalis may have a useful role in the treatment of patients with HF who are in normal sinus rhythm. New trials are needed to elucidate the importance of the dosage of digitalis and its usefulness in the era of beta-blockers and other agents shown to be effective in treating HF.                                                                                                                                                                                                                                                                                                                                                                                                                                                                                                                                                                                                                                                                               |
| Jaeschke, 2008, 3639  | To determine the safety of long-acting b-agonists among patients with asthma using corticosteroids.                                                                                                                                                                                                                                                                                                                                                            | Asthma                                                     | Long acting beta agonists with inhaled corticosteroids vs. Inhaled corticosteroids                                                                    | Total: 62 (29401)<br>Admissions data: 44 (22396) | No  | 5  | In patients with asthma using ICS, LABA did not increase the risk of asthma-related hospitalizations. There were very few asthma-related deaths and intubations, and events were too infrequent to establish LABA's relative effect on these outcomes.                                                                                                                                                                                                                                                                                                                                                                                                                                                                                                                                                                                                                                                                                                                                               |
| Jaeschke, 2008, 3640  | To assess the safety of formoterol in patients with asthma using inhaled corticosteroids.                                                                                                                                                                                                                                                                                                                                                                      | Asthma                                                     | Long acting beta agonists with inhaled corticosteroids vs. Inhaled corticosteroids                                                                    | Total: 16 (10638)<br>Admissions data: 16 (10638) | No  | 4  | In patients with asthma using inhaled corticosteroids formoterol decreased the risk of asthma-related hospitalizations. There were too few asthma-related deaths and intubations to establish formoterol's relative impact on these outcomes.                                                                                                                                                                                                                                                                                                                                                                                                                                                                                                                                                                                                                                                                                                                                                        |
| James, 2008, 3657     | To examine whether topical or intraluminal antibiotics reduce catheter-related bloodstream infection compared with no antibiotic therapy in adults undergoing hemodialysis.                                                                                                                                                                                                                                                                                    | Long-term hemodialysis using a central venous catheter     | Topical prophylactic antibiotics vs. Another or no antimicrobial agent                                                                                | Total: 16 (1395)<br>Admissions data: 2 (305)     | No  | 7  | Both topical and intraluminal antibiotics reduced the rate of bacteremia as well as the need for catheter removal secondary to complications. Whether these strategies will lead to antimicrobial resistance and loss of efficacy over longer periods remains unclear.                                                                                                                                                                                                                                                                                                                                                                                                                                                                                                                                                                                                                                                                                                                               |
| Jankowska, 2016, 8790 | The aim of our study was to summarize the evidence in the form of a meta-analysis of all randomized controlled trials that investigated the effects of i.v. iron therapy in iron-deficient patients with systolic HF (also analysed separately in anaemic and non-anaemic subjects).                                                                                                                                                                           | Iron-deficient patients with systolic heart failure        | Intravenous iron therapy vs. Placebo                                                                                                                  | Total: 5 (509)<br>Admissions data: 4 (835)       | No  | 6  | The evidence indicates that i.v. iron therapy in iron-deficient patients with systolic HF improves outcomes, exercise capacity, and quality of life, and alleviates HF symptoms.                                                                                                                                                                                                                                                                                                                                                                                                                                                                                                                                                                                                                                                                                                                                                                                                                     |
| Jefferson, 2014, 3696 | To describe the potential benefits and harms of NIs for influenza in all age groups by reviewing all clinical study reports of published and unpublished randomised, placebo-controlled trials and regulatory comments.                                                                                                                                                                                                                                        | Influenza                                                  | Oseltamivir for influenza prophylaxis or treatment vs. Placebo                                                                                        | Total: 46 (24251)<br>Admissions data: 11 (7828)  | No  | 11 | Oseltamivir and zanamivir have small, non-specific effects on reducing the time to alleviation of influenza symptoms in adults, but not in asthmatic children. Using either drug as prophylaxis reduces the risk of developing symptomatic influenza. Treatment trials with oseltamivir or zanamivir do not settle the question of whether the complications of influenza (such as pneumonia) are reduced, because of a lack of diagnostic definitions. The use of oseltamivir increases the risk of adverse effects, such as nausea, vomiting, psychiatric effects and renal events in adults and vomiting in children. The lower bioavailability may explain the lower toxicity of zanamivir compared to oseltamivir. The balance between benefits and harms should be considered when making decisions about use of both NIs for either the prophylaxis or treatment of influenza. The influenza virus-specific mechanism of action proposed by the producers does not fit the clinical evidence. |

|                       |                                                                                                                                                                                                                                                                                                 |                                       |                                                                                                                                                                                     |                                                  |     |    |                                                                                                                                                                                                                                                                                                                                                                                                                                                                                                                                                                                                                                                                                                                                                                                                                                                                                           |
|-----------------------|-------------------------------------------------------------------------------------------------------------------------------------------------------------------------------------------------------------------------------------------------------------------------------------------------|---------------------------------------|-------------------------------------------------------------------------------------------------------------------------------------------------------------------------------------|--------------------------------------------------|-----|----|-------------------------------------------------------------------------------------------------------------------------------------------------------------------------------------------------------------------------------------------------------------------------------------------------------------------------------------------------------------------------------------------------------------------------------------------------------------------------------------------------------------------------------------------------------------------------------------------------------------------------------------------------------------------------------------------------------------------------------------------------------------------------------------------------------------------------------------------------------------------------------------------|
| Jong, 2002, 3781      | To determine the effect of ARBs on the survival and hospitalization rates in patients with HF.                                                                                                                                                                                                  | Heart failure                         | Angiotensin receptor blockers (Angiotensin II receptor blocker and angiotensin converting enzyme inhibitor) vs. Angiotensin converting enzyme inhibitors alone                      | Total: 17 (12469)<br>Admissions data: 6 (10031)  | No  | 6  | This meta-analysis cannot confirm that ARBs are superior in reducing all-cause mortality or HF hospitalization in patients with symptomatic HF, particularly when compared with ACEIs. However, the use of ARBs as monotherapy in the absence of ACEIs or as combination therapy with ACEIs appears promising.                                                                                                                                                                                                                                                                                                                                                                                                                                                                                                                                                                            |
| Kang, 2007, 3877      | The aim of this study was to investigate the effectiveness and tolerability of G-CSF treatment with regard to global left ventricular function in patients with myocardial infarction (MI).                                                                                                     | Myocardial infarction                 | Granulocyte colony-stimulating factor (G-CSF) treatment vs. Placebo or blank control                                                                                                | Total: 7 (364)<br>Admissions data: 8 (364)       | No  | 6  | Based on the studies included in this meta-analysis, G-CSF treatment improved the LVEF in AMI (but not OMI) at 3 to 12 months follow-up. Treatment with G-CSF was generally well tolerated.                                                                                                                                                                                                                                                                                                                                                                                                                                                                                                                                                                                                                                                                                               |
| Kang, 2008, 3879      | Therefore, we conducted a systematic review and metaanalysis of available prospective randomized controlled trials (RCTs) to analyze the efficacy and safety of bone marrow-derived stem/progenitor cells (BMC) treatment with global left ventricular function in acute myocardial infarction. | Acute myocardial infarction           | intracoronary bone marrow-derived stem/progenitor cells vs. Placebo or blank control                                                                                                | Total: 6 (517)<br>Admissions data: 6 (517)       | No  | 7  | On the basis of present evidence, intracoronary BMC infusion in patients with AMI seems to be safe and associated with slight improvement of the left ventricular ejection fraction at 3–6 months' follow-up.                                                                                                                                                                                                                                                                                                                                                                                                                                                                                                                                                                                                                                                                             |
| Kansagara, 2013, 3885 | To evaluate the benefits and harms of treatments for anemia in adults with heart disease.                                                                                                                                                                                                       | Heart disease                         | Erythropoiesis stimulating agent vs. Placebo or those comparing more intensive with less intensive interventions                                                                    | Total: 26 (9695)<br>Admissions data: 4 (3901)    | No  | 8  | Higher transfusion thresholds do not consistently improve mortality rates, but large trials are needed. Intravenous iron may help to alleviate symptoms in patients with heart failure and iron deficiency and also warrants further study. Erythropoiesisstimulating agents do not seem to benefit patients with mild to moderate anemia and heart disease and may be associated with serious harms.                                                                                                                                                                                                                                                                                                                                                                                                                                                                                     |
| Karner, 2011, 3908    | To assess the relative effects of inhaled corticosteroid and long-acting beta2-agonist combination therapy in addition to tiotropium compared to tiotropium or combination therapy alone in patients with chronic obstructive pulmonary disease.                                                | Chronic obstructive pulmonary disease | Tiotropium plus long acting beta 2 agonists and or inhaled corticosteroid vs. Inhaled tiotropium bromide alone or inhaled combination corticosteroid and long-acting beta2- agonist | Total: 3 (1051)<br>Admissions data: 2 (961)      | Yes | 10 | To date there is uncertainty regarding the long-term benefits and risks of treatment with tiotropium in addition to inhaled corticosteroid and long-acting beta2-agonist combination therapy on mortality, hospitalisation, exacerbations of COPD and pneumonia. The addition of combination treatment to tiotropium has shown improvements in average health-related quality of life and lung function.                                                                                                                                                                                                                                                                                                                                                                                                                                                                                  |
| Karner, 2014, 8692    | To evaluate data from randomised controlled trials (RCTs) comparing the efficacy of tiotropium and placebo in patients with chronic obstructive pulmonary disease (COPD), upon clinically important endpoints.                                                                                  | Chronic obstructive pulmonary disease | Tiotropium vs. Placebo                                                                                                                                                              | Total: 22 (23309)<br>Admissions data: 21 (22852) | Yes | 10 | This review shows that tiotropium treatment was associated with a significant improvement in patients' quality of life and it reduced the risk of exacerbations, with a number needed to treat to benefit (NNTB) of 16 to prevent one exacerbation. Tiotropium also reduced exacerbations leading to hospitalisation but no significant difference was found for hospitalisation of any cause or mortality. Thus, tiotropium appears to be a reasonable choice for the management of patients with stable COPD, as proposed in guidelines. The trials included in this review showed a difference in the risk of mortality when compared with placebo depending on the type of tiotropium delivery device used. However, these results have not been confirmed in a recent trial when 2.5mcg or 5mcg of tiotropium via Respimat was used in a direct comparison to the 18 mcg Handihaler. |
| Kaur, 2014, 3937      | To determine whether raising HDL-C with pharmacologic therapies translates into beneficial cardiovascular outcomes and to find out if this change was proportional to the percentage change in HDL levels.                                                                                      | Cardiovascular disease                | High density lipoprotein raising therapeutic agents as monotherapy or co-administered with statins vs. The control arm should have had an intervention which                        | Total: 12 (53721)<br>Admissions data: 7 (40155)  | No  | 7  | Increasing HDL levels via pharmacological manipulation beyond optimal lipid lowering therapy for secondary prevention is not beneficial.                                                                                                                                                                                                                                                                                                                                                                                                                                                                                                                                                                                                                                                                                                                                                  |

|                 |                                                                                                                                                                                                                                       |                                       |                                                                                                                                                                                                                                  |                                                  |     |    |                                                                                                                                                                                                                                                                                                                                                                                                                                                                                                                                                                                                                                                                                                                                                                                                                                                                                                                                                                                                                                                                                                                                                                                                                                                                                                                                |
|-----------------|---------------------------------------------------------------------------------------------------------------------------------------------------------------------------------------------------------------------------------------|---------------------------------------|----------------------------------------------------------------------------------------------------------------------------------------------------------------------------------------------------------------------------------|--------------------------------------------------|-----|----|--------------------------------------------------------------------------------------------------------------------------------------------------------------------------------------------------------------------------------------------------------------------------------------------------------------------------------------------------------------------------------------------------------------------------------------------------------------------------------------------------------------------------------------------------------------------------------------------------------------------------------------------------------------------------------------------------------------------------------------------------------------------------------------------------------------------------------------------------------------------------------------------------------------------------------------------------------------------------------------------------------------------------------------------------------------------------------------------------------------------------------------------------------------------------------------------------------------------------------------------------------------------------------------------------------------------------------|
|                 |                                                                                                                                                                                                                                       |                                       | would permit appropriate attribution of the results to HDL targeting drug.                                                                                                                                                       |                                                  |     |    |                                                                                                                                                                                                                                                                                                                                                                                                                                                                                                                                                                                                                                                                                                                                                                                                                                                                                                                                                                                                                                                                                                                                                                                                                                                                                                                                |
| Kew, 2014, 4002 | To assess the safety and efficacy of IV MgSO <sub>4</sub> in adults treated for acute asthma in the emergency department.                                                                                                             | Acute asthma                          | Intravenous magnesium sulfate vs. Placebo                                                                                                                                                                                        | Total: 14 (2313)<br>Admissions data: 11 (972)    | Yes | 10 | This review provides evidence that a single infusion of 1.2 g or 2 g IV MgSO <sub>4</sub> over 15 to 30 minutes reduces hospital admissions and improves lung function in adults with acute asthma who have not responded sufficiently to oxygen, nebulised short-acting beta <sub>2</sub> -agonists and IV corticosteroids. Differences in the ways the trials were conducted made it difficult for the review authors to assess whether severity of the exacerbation or additional co-medications altered the treatment effect of IV MgSO <sub>4</sub> . Limited evidence was found for other measures of benefit and safety. Studies conducted in these populations should clearly define baseline severity parameters and systematically record adverse events. Studies recruiting participants with exacerbations of varying severity should consider subgrouping results on the basis of accepted severity classifications.                                                                                                                                                                                                                                                                                                                                                                                              |
| Kew, 2013, 4003 | To assess the effects of twice-daily long-acting beta <sub>2</sub> -agonists compared with placebo for patients with COPD on the basis of clinically important endpoints, primarily quality of life and COPD exacerbations.           | Chronic obstructive pulmonary disease | Long-acting beta <sub>2</sub> -agonists vs. Not reported                                                                                                                                                                         | Total: 26 (14939)<br>Admissions data: 7 (3804)   | Yes | 11 | Moderate-quality evidence from 26 studies showed that inhaled long-acting beta <sub>2</sub> -agonists are effective over the medium and long term for patients with moderate to severe COPD. Their use is associated with improved quality of life and reduced exacerbations, including those requiring hospitalisation. Overall, findings showed that inhaled LABAs did not significantly reduce mortality or serious adverse events.                                                                                                                                                                                                                                                                                                                                                                                                                                                                                                                                                                                                                                                                                                                                                                                                                                                                                         |
| Kew, 2014, 4004 | To assess the risk of pneumonia associated with the use of fluticasone and budesonide for COPD.                                                                                                                                       | Chronic obstructive pulmonary disease | Fluticasone (with or without long acting beta <sub>2</sub> -agonist) vs. Placebo or long acting beta <sub>2</sub> -agonist                                                                                                       | Total: 43 (31397)<br>Admissions data: 24 (25976) | Yes | 10 | Budesonide and fluticasone, delivered alone or in combination with a LABA, are associated with increased risk of serious adverse pneumonia events, but neither significantly affected mortality compared with controls. The safety concerns highlighted in this review should be balanced with recent cohort data and established randomised evidence of efficacy regarding exacerbations and quality of life. Comparison of the two drugs revealed no statistically significant difference in serious pneumonias, mortality or serious adverse events. Fluticasone was associated with higher risk of any pneumonia when compared with budesonide (i.e. less serious cases dealt with in the community), but variation in the definitions used by the respective manufacturers is a potential confounding factor in their comparison. Primary research should accurately measure pneumonia outcomes and should clarify both the definition and the method of diagnosis used, especially for new formulations and combinations for which little evidence of the associated pneumonia risk is currently available. Similarly, systematic reviews and cohorts should address the reliability of assigning 'pneumonia' as an adverse event or cause of death and should determine how this affects the applicability of findings. |
| Kew, 2016, 8802 | To assess the effects of adding a long-acting muscarinic antagonist (LAMA) to combination long-acting beta <sub>2</sub> -agonists (LABA) and inhaled corticosteroids (ICS) in adults whose asthma is not well controlled by LABA/ICS. | Asthma                                | Long-acting muscarinic antagonists (LAMA) added to combination long-acting beta <sub>2</sub> -agonists and inhaled corticosteroids (LABA/ICS) vs. Long-acting beta <sub>2</sub> -agonists and inhaled corticosteroids (LABA/ICS) | Total: 4 (1197)<br>Admissions data: 3 (1191)     | No  | 10 | Tiotropium add-on may have additional benefits over LABA/ICS alone in reducing the need for rescue oral steroids in people with severe asthma. The effect was imprecise, and there was no evidence for other LAMA preparations. Possible benefits on quality of life were negligible, and evidence for the effect on serious adverse events was inconsistent. There are likely to be small added benefits for tiotropium Respimat 5 µg daily on lung function and asthma control over LABA/ICS alone and fewer non-serious adverse events. The benefit of tiotropium add-on on the frequency of hospital admission is still unknown, despite year-long trials.                                                                                                                                                                                                                                                                                                                                                                                                                                                                                                                                                                                                                                                                 |

|                       |                                                                                                                                                                                                                                                                                                     |                                                               |                                                                                                                                                  |                                                 |    |    |                                                                                                                                                                                                                                                                                                                                                                                                                                                                                                                                                                                                                                                                                                                                                                                                                                                                                                                                                                                                           |
|-----------------------|-----------------------------------------------------------------------------------------------------------------------------------------------------------------------------------------------------------------------------------------------------------------------------------------------------|---------------------------------------------------------------|--------------------------------------------------------------------------------------------------------------------------------------------------|-------------------------------------------------|----|----|-----------------------------------------------------------------------------------------------------------------------------------------------------------------------------------------------------------------------------------------------------------------------------------------------------------------------------------------------------------------------------------------------------------------------------------------------------------------------------------------------------------------------------------------------------------------------------------------------------------------------------------------------------------------------------------------------------------------------------------------------------------------------------------------------------------------------------------------------------------------------------------------------------------------------------------------------------------------------------------------------------------|
|                       |                                                                                                                                                                                                                                                                                                     |                                                               |                                                                                                                                                  |                                                 |    |    | Ongoing and future trials should clearly describe participants' background medications to help clinicians judge how the findings relate to stepwise care. If studies test LAMAs other than tiotropium Respimat for asthma, they should be at least six months long and use accepted and validated outcomes to allow comparisons of the safety and effectiveness between different preparations.                                                                                                                                                                                                                                                                                                                                                                                                                                                                                                                                                                                                           |
| Kew, 2015, 8803       | To assess the efficacy and safety of adding a LAMA to ICS compared with adding a LABA for adults whose asthma is not well controlled on ICS alone.                                                                                                                                                  | Asthma not well controlled with inhaled corticosteroids alone | Long acting muscarinic antagonists added to inhaled corticosteroids vs. Long-acting beta2-agonists (LABA) added to inhaled corticosteroids (ICS) | Total: 8 (unclear)<br>Admissions data: 4 (2022) | No | 11 | Direct evidence of LAMA versus LABA as add-on therapy is currently limited to studies of less than six months comparing tiotropium (Respimat) to salmeterol, and we do not know how they compare in terms of exacerbations and serious adverse events. There was moderate quality evidence that LAMAs show small benefits over LABA on some measures of lung function, and high quality evidence that LABAs are slightly better for quality of life, but the differences were all small. Given the much larger evidence base for LABA versus placebo for people whose asthma is not well controlled on ICS, the current evidence is not strong enough to say that LAMA can be substituted for LABA as add-on therapy. The results of this review, alongside pending results from related reviews assessing the use of LAMA in other clinical scenarios, will help to define the role of these drugs in asthma and it is important that they be updated as results from ongoing and planned trials emerge. |
| Kew, 2015, 8805       | To assess the effects of macrolides for managing chronic asthma.                                                                                                                                                                                                                                    | Chronic asthma                                                | Macrolides vs. Placebo                                                                                                                           | Total: 23 (1513)<br>Admissions data: 2 (143)    | No | 11 | Existing evidence does not show macrolides to be better than placebo for the majority of clinical outcomes. However, they may have a benefit on some measures of lung function, and we cannot rule out the possibility of other benefits or harms because the evidence is of very low quality due to heterogeneity among patients and interventions, imprecision and reporting biases. The review highlights the need for researchers to report clinically relevant outcomes accurately and completely using guideline definitions of exacerbations and validated scales. The possible benefit of macrolides in patients with non-eosinophilic asthma based on subgroup analyses in two of the included studies may require further investigation.                                                                                                                                                                                                                                                        |
| Kishimoto, 2013, 4065 | Few controlled trials compared second-generation antipsychotics (SGAs) with first-generation antipsychotics (FGAs) regarding relapse prevention in schizophrenia. We conducted a systematic review/meta-analysis of randomized trials, lasting >6 months comparing SGAs with FGAs in schizophrenia. | Schizophrenia                                                 | Second generation antipsychotics vs. First generation antipsychotics                                                                             | Total: 23 (4504)<br>Admissions data: 11 (2869)  | No | 6  | In conclusion, results from this meta-analysis suggest that, whereas individually SGAs were not consistently superior to FGAs, as a group, SGAs were associated with less study-defined relapse, overall treatment failure and hospitalization than FGAs, having a modest but clinically relevant effect size. Future relapse prevention studies should carefully assess EPS and adherence. Moreover, additional studies with a variety of SGAs using non-haloperidol FGA comparators at low-medium doses that do not produce significantly greater EPS than SGAs are needed to extend these findings. In particular, sufficiently large data sets are needed to allow examination of the relative merits of individual SGAs, and to guide an individualized and evidence-based maintenance treatment selection in schizophrenia.                                                                                                                                                                         |
| Kishimoto, 2014, 4067 | While long-acting injectable antipsychotics (LAIs) are hoped to reduce high relapse rates in schizophrenia, recent randomized controlled trials (RCTs) challenged the benefits of LAIs over oral antipsychotics (OAPs).                                                                             | Schizophrenia                                                 | Long-acting injectable antipsychotics vs. Oral Antipsychotics                                                                                    | Total: 21 (5176)<br>Admissions data: 10 (2341)  | No | 8  | In RCTs, which are less representative of real-world patients than naturalistic studies, pooled LAIs did not reduce relapse compared with OAPs in schizophrenia patients. The exceptions were FGA-LAIs, mostly consisting of fluphenazine-LAI studies, which were all conducted through 1991. Because this finding is vulnerable to a cohort bias, studies comparing FGA-LAI vs second-generation                                                                                                                                                                                                                                                                                                                                                                                                                                                                                                                                                                                                         |

|                         |                                                                                                                                                                                                                                                        |                                                                                                                                                                          |                                                                                                                                |                                                |     |   |                                                                                                                                                                                                                                                                                                                                                                                                                                                                                                                                                                                                                                                                                                                                                                                                       |
|-------------------------|--------------------------------------------------------------------------------------------------------------------------------------------------------------------------------------------------------------------------------------------------------|--------------------------------------------------------------------------------------------------------------------------------------------------------------------------|--------------------------------------------------------------------------------------------------------------------------------|------------------------------------------------|-----|---|-------------------------------------------------------------------------------------------------------------------------------------------------------------------------------------------------------------------------------------------------------------------------------------------------------------------------------------------------------------------------------------------------------------------------------------------------------------------------------------------------------------------------------------------------------------------------------------------------------------------------------------------------------------------------------------------------------------------------------------------------------------------------------------------------------|
|                         |                                                                                                                                                                                                                                                        |                                                                                                                                                                          |                                                                                                                                |                                                |     |   | antipsychotics-LAI and LAI vs OAP RCTs in real-world patients are needed.                                                                                                                                                                                                                                                                                                                                                                                                                                                                                                                                                                                                                                                                                                                             |
| Komossa, 2010, 4123     | To evaluate the effects of olanzapine compared to other atypical antipsychotics for people with schizophrenia and schizophrenia-like psychosis.                                                                                                        | Schizophrenia and schizophrenia-like psychosis                                                                                                                           | Olanzapine or other atypical antipsychotic drugs vs. Second generation (atypical) antipsychotics                               | Total: 50 (9100)<br>Admissions data: 4 (1932)  | No  | 9 | Olanzapine may be a somewhat more efficacious drug than some other second generation antipsychotic drugs. This small superiority in efficacy needs to be weighed against a larger weight gain and associated metabolic problems than most other second generation antipsychotic drugs, except clozapine. These conclusions are tentative due to the large number of people leaving the studies early which possibly limits the validity of the findings. Further large, well-designed trials are necessary to establish the relative effects of different second generation antipsychotic drugs.                                                                                                                                                                                                      |
| Kuenzli, 2010, 4206     | To investigate the effect of adding ARBs to ACE inhibitor therapy alone in terms of clinically relevant beneficial and adverse patient important outcomes including hospital readmissions for any reason.                                              | Left ventricular dysfunction or congestive heart failure and background therapy with ACE inhibitor therapy in at least 90% of patients (i.e. patients on ACE inhibitors) | Angiotensin II receptor blocker and angiotensin converting enzyme inhibitor vs. Angiotensin enzyme converting inhibitors alone | Total: 8 (18061)<br>Admissions data: 6 (17948) | No  | 7 | Combination therapy with ARBs and ACE inhibitors reduces admissions for heart failure in patients with congestive heart failure when compared to ACE inhibitor therapy alone, but does not reduce overall mortality or all-cause hospitalization and is associated with more adverse events. Thus, based on current evidence, combination therapy with ARBs and ACE inhibitors may be reserved for patients who remain symptomatic on therapy with ACE inhibitors under strict monitoring for any signs of worsening renal function and/or symptomatic hypotension.                                                                                                                                                                                                                                   |
| Kumar, 2014, 8815       | We undertook a systematic review and metaanalysis to assess whether the maintenance of anaesthesia using propofol TIVA is associated with fewer unplanned hospital admissions than maintenance with the inhalational agents sevoflurane or desflurane. | Ambulatory surgery                                                                                                                                                       | Total intravenous anaesthesia using propofol with sevoflurane vs. Inhalational agents sevoflurane or desflurane                | Total: 18 (1621)<br>Admissions data: 10 (1621) | Yes | 6 | Therefore, based on the published evidence to date, maintenance of anaesthesia using propofol appeared to have no bearing on the incidence of unplanned admission to hospital and was more expensive, but was associated with a decreased incidence of early postoperative nausea and vomiting compared with sevoflurane or desflurane in patients undergoing ambulatory surgery.                                                                                                                                                                                                                                                                                                                                                                                                                     |
| Kuswardhani, 2011, 4239 | To confirm the beneficial effect of BMCs therapy over placebo in AMI patients with inclusion only to the randomized double blind placebo-controlled trials                                                                                             | Acute myocardial infarction                                                                                                                                              | Bone Marrow-derived Stem Cells vs. Control/placebo                                                                             | Total: 10 (686)<br>Admissions data: 3 (319)    | No  | 6 | The resulting meta-analysis concluded that BMCs therapy consistently improves cardiac performance parameters (LVEF, LVESV, and LVEDV) when compared to placebo, even after the establishment of primary intervention. It is also safe to use and prevents the development of recurrent MI and HF.                                                                                                                                                                                                                                                                                                                                                                                                                                                                                                     |
| La Mantia, 2010, 4260   | To verify the clinical efficacy of glatiramer acetate in the treatment of MS patients with relapsing remitting (RR) and progressive (P) course.                                                                                                        | Multiple sclerosis                                                                                                                                                       | Glatiramer acetate vs. Placebo                                                                                                 | Total: 6 (3233)<br>Admissions data: 2 (449)    | No  | 9 | Glatiramer acetate did show a partial efficacy in RR MS in term of relapse -related clinical outcomes, without any significant effect on clinical progression of disease measured as sustained disability. The drug is not effective in progressive MS patients.                                                                                                                                                                                                                                                                                                                                                                                                                                                                                                                                      |
| Lasserson, 2011, 4362   | To assess the relative effects of fluticasone/salmeterol and budesonide/formoterol in people with asthma.                                                                                                                                              | Chronic asthma                                                                                                                                                           | Long acting beta agonists with inhaled corticosteroids vs. Fixed dose combination budesonide and formoterol                    | Total: 5 (5537)<br>Admissions data: 4 (4879)   | Yes | 9 | Statistical imprecision in the effect estimates for exacerbations and serious adverse events do not enable us to conclude that either therapy is superior. The uncertainty around the effect estimates justify further trials to provide more definitive conclusions; the overall quality of evidence based on GRADE recommendations for the three primary outcomes and withdrawals due to serious adverse events was moderate. We rated the quality of evidence for mortality to be low. Results for lung function outcomes showed that the drugs were sufficiently similar that further research is unlikely to change the effects. No trials were identified in the under-12s and research in this population is a high priority. Evaluation of quality of life is a priority for future research. |
| Le, 2016, 8817          | Our study aimed to assess the efficacy of AA on SCD, hospitalization admission and several common adverse events in patients with HF or post MI.                                                                                                       | Heart failure and post-myocardial infarction                                                                                                                             | Aldosterone Antagonists vs. Placebo or routine treatment                                                                       | Total: 25 (19333)                              | No  | 8 | Aldosterone antagonists appear to be effective in reducing SCD and other mortality events, compared with placebo or standard medication in patients with HF and/or after a MI.                                                                                                                                                                                                                                                                                                                                                                                                                                                                                                                                                                                                                        |

|                            |                                                                                                                                                                                                                                                                                                                                                        |                                                                    |                                                                                                                 |                                                        |     |    |                                                                                                                                                                                                                                                                                                                                                                                                                                                                                  |
|----------------------------|--------------------------------------------------------------------------------------------------------------------------------------------------------------------------------------------------------------------------------------------------------------------------------------------------------------------------------------------------------|--------------------------------------------------------------------|-----------------------------------------------------------------------------------------------------------------|--------------------------------------------------------|-----|----|----------------------------------------------------------------------------------------------------------------------------------------------------------------------------------------------------------------------------------------------------------------------------------------------------------------------------------------------------------------------------------------------------------------------------------------------------------------------------------|
|                            |                                                                                                                                                                                                                                                                                                                                                        |                                                                    |                                                                                                                 | Admissions data:<br>14 (8151)                          |     |    |                                                                                                                                                                                                                                                                                                                                                                                                                                                                                  |
| Leucht,<br>2011,<br>4505   | Non-adherence is a major problem in the treatment of schizophrenia. Depot antipsychotic drugs are thought to reduce relapse rates by improving adherence, but a systematic review of long-term studies in outpatients is not available.                                                                                                                | Schizophrenia                                                      | Depot antipsychotic drugs<br>vs.<br>Oral formulations of antipsychotic drugs                                    | Total:<br>10 (1700)<br>Admissions data:<br>7 (1476)    | No  | 7  | Depot antipsychotic drugs significantly reduced relapse. Due to a number of methodological problems in the single trials the evidence is, nonetheless, subject to possible bias.                                                                                                                                                                                                                                                                                                 |
| Leucht,<br>2012,<br>4508   | To review the effects of maintaining antipsychotic drug treatment for people with schizophrenia compared to withdrawing these agents.                                                                                                                                                                                                                  | Schizophrenia                                                      | Maintenance/continuous treatment with antipsychotic drugs<br>vs.<br>Active or inactive placebo, or no treatment | Total:<br>65 (6493)<br>Admissions data:<br>16 (2090)   | No  | 11 | The results clearly demonstrate the superiority of antipsychotic drugs compared to placebo in preventing relapse. This effect must be weighed against the side effects of antipsychotic drugs. Future studies should focus on outcomes of social participation and clarify the long-term morbidity and mortality associated with these drugs.                                                                                                                                    |
| Levy,<br>2010,<br>4518     | Aim of this systematic review was to examine the current published evidence concerning the impact of differing perioperative analgesic regimens on the shortterm outcomes following laparoscopic colorectal surgery.                                                                                                                                   | Patients getting a colorectal resection                            | Patient controlled analgesia<br>vs.<br>Epidural                                                                 | Total:<br>6 (227)<br>Admissions data:<br>3 (132)       | No  | 3  | There is a paucity of data assessing the benefits of postoperative analgesic regimes following laparoscopic colorectal surgery and none of the protocols were shown to be clearly superior. Further studies, including the assessment of spinal analgesia are required to determine the most appropriate analgesic regime following laparoscopic colorectal surgery.                                                                                                             |
| Li,<br>2016,<br>8822       | To examine the association between dipeptidyl peptidase-4 (DPP-4) inhibitors and the risk of heart failure or hospital admission for heart failure in patients with type 2 diabetes.                                                                                                                                                                   | Type 2 diabetes                                                    | Dipeptidyl peptidase-4 inhibitors<br>vs.<br>Placebo or active antidiabetic drugs (glimepiride)                  | Total:<br>38 (31680)<br>Admissions data:<br>5 (37095)  | Yes | 9  | The relative effect of DPP-4 inhibitors on the risk of heart failure in patients with type 2 diabetes is uncertain, given the relatively short follow-up and low quality of evidence. Both randomised controlled trials and observational studies, however, suggest that these drugs may increase the risk of hospital admission for heart failure in those patients with existing cardiovascular diseases or multiple risk factors for vascular diseases, compared with no use. |
| Liew,<br>2014,<br>4577     | We performed a meta-analysis of all these trials in order to obtain best estimates of the efficacy and safety of warfarin as compared with antiplatelet therapy, in patients with systolic heart failure who are in sinus rhythm.                                                                                                                      | Heart failure                                                      | Warfarin<br>vs.<br>Antiplatelet therapy                                                                         | Total:<br>4 (4187)<br>Admissions data:<br>4 (4187)     | No  | 4  | Warfarin as compared with antiplatelet therapy reduces risk of ischemic stroke, does not significantly affect death, myocardial infarction, hospitalization due to heart failure or intracranial hemorrhage and increases major hemorrhage in heart failure patients who are in sinus rhythm.                                                                                                                                                                                    |
| Lipinski,<br>2009,<br>4615 | The goal of this study was to systematically review randomized trials comparing statins to placebo for HF and compare the impact of different statins.                                                                                                                                                                                                 | Heart failure                                                      | Statins<br>vs.<br>Placebo                                                                                       | Total:<br>10 (10203)<br>Admissions data:<br>10 (10193) | No  | 7  | In conclusion, meta-analysis of randomized controlled trials demonstrated that statins are safe and improve LVEF and decrease hospitalization for worsening HF.                                                                                                                                                                                                                                                                                                                  |
| Liu,<br>2014,<br>4629      | Given the limited evidence and uncertain effects of betablockers in the patients with HFpEF, this meta-analysis summarized the current data from randomized controlled trials (RCTs) and observational studies (OSs) to determine the impact of the beta-blockers treatment on mortality and hospitalization in the patients with HFpEF (an EF < 40%). | Heart failure with preserved ejection fraction (an EF $\geq$ 40%). | Beta-blockers<br>vs.<br>Non-beta-blocker control                                                                | Total:<br>2 (888)<br>Admissions data:<br>2 (888)       | Yes | 4  | The beta-blockers treatment for the patients with HFpEF was associated with a lower risk of all-cause mortality, but not with a lower risk of hospitalization. These findings were mainly obtained from observational studies, and further investigations are needed to make an assertion.                                                                                                                                                                                       |
| Liu,<br>2014,<br>8826      | Therefore, we performed a meta-analysis of all prospective RCTs to assess the effects of lipophilic statins, including simvastatin, atorvastatin, and pitavastatin, on mortality, hospitalisation for worsening HF, LVEF, and low-density lipoprotein (LDL) cholesterol in HF patients.                                                                | Heart failure: (left ventricular ejection fraction < 45%)          | Lipophilic Statins<br>vs.<br>No statin or placebo                                                               | Total:<br>13 (1532)<br>Admissions data:<br>9 (1087)    | Yes | 7  | It appears that further studies are needed to determine if lipophilic statins are beneficial for HF patients.                                                                                                                                                                                                                                                                                                                                                                    |
| Liu,<br>2014,<br>8827      | To assess the feasibility and safety of early oral feeding (EOF) after gastrectomy for gastric cancer through a systematic review and meta-analysis based on randomized controlled trials.                                                                                                                                                             | Gastrointestinal cancer surgery                                    | Early oral feeding<br>vs.<br>Traditional postoperative oral feeding                                             | Total:<br>6 (454)                                      | Yes | 7  | The result of this meta-analysis showed that EOF after gastric cancer surgery seems feasible and safe, even started at the day of surgery irrespective of the extent of the gastric resection and the type of surgery. However, more prospective, well-designed                                                                                                                                                                                                                  |



|                            |                                                                                                                                                                                                                                                                                                                                                                                                                                            |                                                                                                |                                                                                                                                                                                                                                                                          |                                                        |    |   |                                                                                                                                                                                                                                                                                                                                                                                                                                                                                                                                                                                                                                                                                                                                                     |
|----------------------------|--------------------------------------------------------------------------------------------------------------------------------------------------------------------------------------------------------------------------------------------------------------------------------------------------------------------------------------------------------------------------------------------------------------------------------------------|------------------------------------------------------------------------------------------------|--------------------------------------------------------------------------------------------------------------------------------------------------------------------------------------------------------------------------------------------------------------------------|--------------------------------------------------------|----|---|-----------------------------------------------------------------------------------------------------------------------------------------------------------------------------------------------------------------------------------------------------------------------------------------------------------------------------------------------------------------------------------------------------------------------------------------------------------------------------------------------------------------------------------------------------------------------------------------------------------------------------------------------------------------------------------------------------------------------------------------------------|
|                            |                                                                                                                                                                                                                                                                                                                                                                                                                                            |                                                                                                |                                                                                                                                                                                                                                                                          | Admissions data:<br>5 (372)                            |    |   | multicenter RCTs with more clinical outcomes are needed for further validation.                                                                                                                                                                                                                                                                                                                                                                                                                                                                                                                                                                                                                                                                     |
| Lopez,<br>2015,<br>8829    | The aim of this meta-analysis was to evaluate the clinical efficacy (clinical response, clinical remission, and mucosal healing rates), and for the first time the need for colectomy and UC-related hospitalisations of all TNF antagonists (infliximab, adalimumab and golimumab) that have been evaluated in randomised, placebocontrolled phase III trials in adults with moderately to severely active UC. Safety was also evaluated. | Ulcerative colitis                                                                             | Tumour necrosis factor antagonists (anti-TNF):<br>Infliximab, Adalimumab<br>vs.<br>Placebo                                                                                                                                                                               | Total:<br>5 (3654)<br>Admissions data:<br>2 (1691)     | No | 8 | Anti-tumour necrosis factor therapy is more effective than placebo to induce and maintain clinical remission and mucosal healing. Both infliximab and adalimumab are associated with less hospitalisations. Infliximab reduces the need for colectomy. Anti-tumour necrosis factor therapy does not increase the risk of adverse events.                                                                                                                                                                                                                                                                                                                                                                                                            |
| Magee,<br>2003,<br>4812    | To assess whether oral beta-blockers are better than placebo, or no beta-blocker, and have advantages over other antihypertensives, for women with mild to moderate pregnancy hypertension.                                                                                                                                                                                                                                                | Mild to moderate hypertension during pregnancy                                                 | Beta-blockers<br>vs.<br>Placebo, no therapy, or other antihypertensive drug therapy                                                                                                                                                                                      | Total:<br>29 (2500)<br>Admissions data:<br>5 (563)     | No | 9 | Improvement in control of maternal blood pressure with use of beta-blockers would be worthwhile only if it were reflected in substantive benefits for mother and/or baby, and none have been clearly demonstrated. The effect of beta-blockers on perinatal outcome is uncertain; the worrying trend to an increase in SGA infants is partly dependent on one small outlying trial. Large randomised trials are needed to determine whether antihypertensive therapy in general (rather than beta-blocker therapy specifically) results in greater benefit than risk, for treatment of mild-moderate pregnancy hypertension. If so, then it would be appropriate to consider which antihypertensive is best, and beta-blockers should be evaluated. |
| Magee,<br>2000,<br>4815    | This overview was undertaken to relate measurable characteristics of participants, interventions, and outcome definitions to demonstrated effects of b-blockers for pregnancy hypertension.                                                                                                                                                                                                                                                | Pregnancy hypertension                                                                         | Beta-blockers<br>vs.<br>Non-b-blocker or no therapy (placebo, no treatment)                                                                                                                                                                                              | Total:<br>32 (2474)<br>Admissions data:<br>5 (563)     | No | 9 | It is not clear that the benefits outweigh the risks when b-blockers are used to treat mild to moderate chronic or pregnancy-induced hypertension, given the unknown overall effect on perinatal outcomes. For severe 'late-onset' pregnancy hypertension, i.v. labetalol is safer than i.v. hydralazine or diazoxide.                                                                                                                                                                                                                                                                                                                                                                                                                              |
| Makani,<br>2013,<br>4838   | We compared the long term efficacy of dual blockade of the renin-angiotensin system (any two of ACE inhibitors, angiotensin receptor blockers, or aliskiren) with monotherapy and evaluated adverse events in patients receiving dual therapy compared with monotherapy.                                                                                                                                                                   | Not reported                                                                                   | Dual blockade of the renin-angiotensin system (any two of ACE inhibitors, angiotensin receptor blockers, or aliskiren)<br>vs.<br>Single renin-angiotensin blockade (Angiotensin converting enzyme inhibitor or angiotensin receptor blockers or direct renin inhibitors) | Total:<br>33 (68405)<br>Admissions data:<br>5 (42071)  | No | 6 | Although dual blockade of the renin-angiotensin system may have seemingly beneficial effects on certain surrogate endpoints, it failed to reduce mortality and was associated with an excessive risk of adverse events such as hyperkalaemia, hypotension, and renal failure compared with monotherapy. The risk to benefit ratio argues against the use of dual therapy.                                                                                                                                                                                                                                                                                                                                                                           |
| Makrides,<br>2014,<br>4844 | To assess the effects of magnesium supplementation during pregnancy on maternal, neonatal/infant and paediatric outcomes, using the best available evidence.                                                                                                                                                                                                                                                                               | Pregnancy                                                                                      | Magnesium<br>vs.<br>Not specified                                                                                                                                                                                                                                        | Total:<br>10 (9090)<br>Admissions data:<br>3 (1158)    | No | 9 | There is not enough high-quality evidence to show that dietary magnesium supplementation during pregnancy is beneficial.                                                                                                                                                                                                                                                                                                                                                                                                                                                                                                                                                                                                                            |
| Mannucci,<br>2008,<br>4889 | The aim of this meta-analysis of randomized clinical trials (RCT) was to assess whether pioglitazone is also associated with increased cardiovascular risk, as recently reported for rosiglitazone.                                                                                                                                                                                                                                        | Patients at relatively low risk of cardiovascular risk, such as those with metabolic endpoints | Pioglitazone<br>vs.<br>Any other treatment with a duration of at least 4 weeks (Placebo, sulphonylureas, or dual peroxisome proliferator-activated receptor-alpha, gamma agonists (glitazars))                                                                           | Total:<br>94 (21180)<br>Admissions data:<br>40 (10322) | No | 5 | The use of pioglitazone does not appear to be harmful in terms of cardiovascular events and all-cause deaths.                                                                                                                                                                                                                                                                                                                                                                                                                                                                                                                                                                                                                                       |
| Medic,<br>2016,<br>8842    | The objective of this study was to estimate the relative efficacy and safety of fixed-dose combination aclidinium/formoterol 400/12 lg twice daily compared                                                                                                                                                                                                                                                                                | Moderate-to-severe chronic                                                                     | Aclidinium, Formoterol,<br>Tiotropium                                                                                                                                                                                                                                    | Total:<br>17 (21954)                                   | No | 7 | Based on the ITC, aclidinium/formoterol is expected to be more efficacious than tiotropium in terms of lung function and symptom                                                                                                                                                                                                                                                                                                                                                                                                                                                                                                                                                                                                                    |

|                      |                                                                                                                                                                                                                                                                                                                                |                                                      |                                                                                                                     |                                                       |     |    |                                                                                                                                                                                                                                                                                                                                                                                                                                                                                                                              |
|----------------------|--------------------------------------------------------------------------------------------------------------------------------------------------------------------------------------------------------------------------------------------------------------------------------------------------------------------------------|------------------------------------------------------|---------------------------------------------------------------------------------------------------------------------|-------------------------------------------------------|-----|----|------------------------------------------------------------------------------------------------------------------------------------------------------------------------------------------------------------------------------------------------------------------------------------------------------------------------------------------------------------------------------------------------------------------------------------------------------------------------------------------------------------------------------|
|                      | to tiotropium 18 lg once daily in adult patients with moderate-to-severe chronic obstructive pulmonary disease (COPD).                                                                                                                                                                                                         | obstructive pulmonary disease                        | vs.<br>Placebo; tiotropium                                                                                          | Admissions data:<br>unclear (unclear)                 |     |    | control while providing comparable HRQoL results and safety profile.                                                                                                                                                                                                                                                                                                                                                                                                                                                         |
| Mohammed, 2007, 5325 | To estimate the effect of intravenous and nebulised magnesium sulphate upon hospital admissions and pulmonary function in adults and children with acute asthma.                                                                                                                                                               | Acute asthma                                         | Intravenous or nebulised magnesium sulphate vs.<br>Not pre-specified: Saline solution used in most included studies | Total:<br>24 (1669)<br>Admissions data:<br>18 (1359)  | Yes | 6  | Intravenous magnesium sulphate appears to be an effective treatment in children. Further trials are needed of intravenous and nebulised magnesium sulphate in adults and nebulised magnesium sulphate in children.                                                                                                                                                                                                                                                                                                           |
| Møiniche, 2003, 5330 | The aim of this systematic review was to critically appraise the existing data on the incidence of perioperative bleeding complications caused by NSAIDs and to quantify the potential impact of NSAIDs on bleeding.                                                                                                           | Post-operative tonsillectomy                         | Nonsteroidal antiinflammatory drugs vs.<br>Non-NSAID treatment                                                      | Total:<br>25 (1853)<br>Admissions data:<br>8 (506)    | Yes | 3  | Of four bleeding end points (intraoperative blood loss, postoperative bleeding, hospital admission, and reoperation because of bleeding), only reoperation happened significantly more often with NSAIDs: Peto odds ratio, 2.33 (95% confidence interval [CI], 1.12– 4.83) and number-needed-to-treat, 60 (95% CI, 34–277). Compared with opioids, NSAIDs were equianalgesic, and the risk of emesis was significantly decreased (relative rate 0.73; 95% CI, 0.63– 0.85; numbers-needed-to-treat, 9; 95% CI, 5–19).         |
| Moore, 2006, 5371    | The aim of this review was to systematically examine the available evidence concerning MMF in lupus nephritis from randomised trials and observational studies.                                                                                                                                                                | Lupus nephritis                                      | Mycophenolate mofetil vs.<br>Cyclophosphamide and steroid                                                           | Total:<br>6 (370)<br>Admissions data:<br>2 (220)      | No  | 6  | The results form a basis on which to plan future studies and provide a guide for the use of MMF in lupus nephritis until results of larger studies are available. At least one such study is under way.                                                                                                                                                                                                                                                                                                                      |
| Nair, 2012, 5515     | To determine whether intravenous aminophylline has an additional bronchodilation effect in adult patients with acute asthma when used in conjunction with inhaled beta2-agonists with or without systemic corticosteroids (intravenous, oral, inhaled or combinations of these).                                               | Acute asthma                                         | Aminophylline vs.<br>Placebo or inhaled beta2-agonists alone                                                        | Total:<br>19 (817)<br>Admissions data:<br>6 (315)     | No  | 9  | The use of intravenous aminophylline did not result in significant additional bronchodilation compared to standard care with inhaled beta2-agonists in patients experiencing an asthma exacerbation in the ED setting, or in a significant reduction in the risk of hospital admission.                                                                                                                                                                                                                                      |
| Nannini, 2013, 5533  | To determine the efficacy and safety of combined ICS and LABA for stable COPD in comparison with placebo.                                                                                                                                                                                                                      | Chronic obstructive pulmonary disease                | Combined inhalers vs.<br>Placebo                                                                                    | Total:<br>19 (10400)<br>Admissions data:<br>12 (9492) | Yes | 10 | Combined inhaler therapy led to around a quarter fewer COPD exacerbations than were seen with placebo. A significant reduction in all-cause mortality was noted, but this outcome was dominated by one trial (TORCH), emphasising the need for further trials of longer duration. Increased risk of pneumonia is a concern; however, this did not translate into increased exacerbations, hospitalisations or deaths.                                                                                                        |
| Nannini, 2013, 8694  | To assess the efficacy and safety of combined long-acting beta2-agonist and inhaled corticosteroid (LABA/ICS) preparations, as measured by clinical endpoints and pulmonary function testing, compared with inhaled corticosteroids (ICS) alone, in the treatment of adults with chronic obstructive pulmonary disease (COPD). | Chronic obstructive pulmonary disease                | Combined corticosteroid and long-acting beta2-agonist in one inhaler vs.<br>Inhaled corticosteroids alone           | Total:<br>15 (7814)<br>Admissions data:<br>10 (7060)  | Yes | 10 | Combination ICS and LABA offer some clinical benefits in COPD compared with ICS alone, especially for reduction in exacerbations. This review does not support the use of ICS alone when LABAs are available. Adverse events were not significantly different between treatments. Further long-term assessments using practical outcomes of current and new 24-hour LABAs will help determine their efficacy and safety. For robust comparisons as to their relative effects, long-term head-to-head comparisons are needed. |
| Ngo, 2010, 5606      | To assess the benefit and risk of ESAs for chronic heart failure patients with anaemia.                                                                                                                                                                                                                                        | Chronic heart failure and anaemia of chronic disease | Erythropoiesis stimulating agent vs.<br>Placebo or no treatment                                                     | Total:<br>11 (794)<br>Admissions data:<br>9 (734)     | No  | 10 | Meta-analysis of small RCTs suggests that ESA treatment in patients with symptomatic CHF and mild anaemia (haemoglobin more than 10g/dL) can improve anaemia and exercise tolerance, reduce symptoms and have benefits on clinical outcomes. Confirmation requires well-designed studies with careful attention to dose, haemoglobin treatment target and associated iron therapy.                                                                                                                                           |

|                    |                                                                                                                                                                                                                                                                                                                                                                          |                                                             |                                                                                                                                        |                                                |     |    |                                                                                                                                                                                                                                                                                                                                                                                                                                                                                                                                                                                                                                                                                                                            |
|--------------------|--------------------------------------------------------------------------------------------------------------------------------------------------------------------------------------------------------------------------------------------------------------------------------------------------------------------------------------------------------------------------|-------------------------------------------------------------|----------------------------------------------------------------------------------------------------------------------------------------|------------------------------------------------|-----|----|----------------------------------------------------------------------------------------------------------------------------------------------------------------------------------------------------------------------------------------------------------------------------------------------------------------------------------------------------------------------------------------------------------------------------------------------------------------------------------------------------------------------------------------------------------------------------------------------------------------------------------------------------------------------------------------------------------------------------|
| Ni, 2009, 5611     | To examine the safety and efficacy of initiating a combination of long-acting $\beta_2$ -agonists and inhaled corticosteroids compared to a similar dose or a higher dose of inhaled corticosteroids alone, in steroid-naive children and adults with persistent asthma.                                                                                                 | Asthma                                                      | Addition of long-acting beta2-agonists to inhaled corticosteroids as first line therapy vs. Same dose of inhaled corticosteroids alone | Total: 28 (8050)<br>Admissions data: 12 (4872) | No  | 9  | In patients with asthma who require daily anti-inflammatory therapy, there is insufficient evidence to support initiating therapy with a combination of inhaled corticosteroids (ICS) and long-acting $\beta_2$ -agonist (LABA) rather than with inhaled corticosteroids alone.                                                                                                                                                                                                                                                                                                                                                                                                                                            |
| Ni, 2014, 8850     | To assess the efficacy and safety of aclidinium bromide in stable COPD.                                                                                                                                                                                                                                                                                                  | Stable chronic obstructive pulmonary                        | Aclidinium bromide vs. Placebo; long-acting muscarinic antagonist                                                                      | Total: 12 (9547)<br>Admissions data: 10 (5624) | No  | 11 | Aclidinium is associated with improved quality of life and reduced hospitalisations due to severe exacerbations in patients with moderate to severe stable COPD compared to placebo. Overall, aclidinium did not significantly reduce mortality, serious adverse event or exacerbations requiring oral steroids or antibiotics, or both. Currently, the available data are insufficient and of very low quality in comparisons of the efficacy of aclidinium versus tiotropium. The efficacy of aclidinium versus LABAs cannot be assessed due to inaccurate data. Thus additional trials are recommended to assess the efficacy and safety of aclidinium compared to other LAMAs or LABAs.                                |
| Ni, 2015, 9197     | Hence, in order to add more information and evidence to clinical practice, we performed an updated meta-analysis to evaluate the efficacy and safety of prophylactic macrolide therapy on the prevention of acute exacerbations of chronic obstructive pulmonary disease.                                                                                                | Chronic obstructive pulmonary disease                       | Prophylactic use of macrolide antibiotics vs. Placebo                                                                                  | Total: 9 (1666)<br>Admissions data: 5 (1424)   | No  | 6  | Our results suggest 6-12 months erythromycin or azithromycin therapy could effectively reduce the frequency of exacerbations in patients with COPD. However, Long-term treatment may bring increased adverse events and the emergence of macrolide-resistance. A recommendation for the prophylactic use of macrolide therapy should weigh both the advantages and disadvantages                                                                                                                                                                                                                                                                                                                                           |
| Pizzi, 2011, 6161  | We carried out a meta-analysis to summarize evidence on the effects of SSRI versus placebo or no antidepressants in all-cause mortality and readmission for CHD in patients with CHD and depression.                                                                                                                                                                     | Cardiovascular disease and depression                       | Selective serotonin reuptake inhibitors vs. Placebo or no anti-depressant                                                              | Total: 4 (2461)<br>Admissions data: 3 (707)    | Yes | 9  | When only properly randomized trials were considered (n = 734 patients), patients on SSRIs showed no significant differences in mortality (risk ratio 0.39, 95% confidence interval 0.08 to 2.01) or CHD readmission rates (0.74, 0.44 to 1.23) compared to controls. Conversely, when all studies were included, SSRI use was associated with a significant decrease in CHD readmission (0.63, 0.46 to 0.86) and mortality rates (0.56, 0.35 to 0.88). A significantly greater improvement in depression symptoms was always apparent in patients on SSRIs with all selected indicators. In conclusion, in patients with CHD and depression, SSRI medication decreases depression symptoms and may improve CHD prognosis. |
| Poole, 2015, 8867  | Primary objective: To determine whether treatment with mucolytics reduces frequency of exacerbations and/or days of disability in patients with chronic bronchitis or COPD. Secondary objectives: To assess whether mucolytics lead to improvement in lung function or quality of life. To determine the frequency of adverse effects associated with use of mucolytics. | Chronic bronchitis or chronic obstructive pulmonary disease | Mucolytic agents vs. Placebo                                                                                                           | Total: 26 (6233)<br>Admissions data: 4 (1788)  | No  | 10 | In participants with chronic bronchitis or COPD, we are moderately confident that treatment with mucolytics may produce a small reduction in acute exacerbations and a small effect on overall quality of life. Our confidence in the results is reduced by the fact that effects on exacerbations shown in early trials were larger than those reported by more recent studies, possibly because the earlier smaller trials were at greater risk of selection or publication bias, thus benefits of treatment may not be as great as was suggested by previous evidence.                                                                                                                                                  |
| Powell, 2015, 8868 | To compare the effects of mepolizumab with placebo on exacerbations and HRQoL in adults and children with chronic asthma.                                                                                                                                                                                                                                                | Asthma                                                      | Mepolizumab vs. Placebo                                                                                                                | Total: 8 (1707)<br>Admissions data: 2 (690)    | Yes | 11 | It is not possible to draw firm conclusions from this review with respect to the role of mepolizumab in patients with asthma. Our confidence in the results of this review are limited by the fact that the intravenous route is not currently licensed for mepolizumab, and the evidence for the currently licenced subcutaneous route is limited to a single study in participants with severe eosinophilic asthma. The currently available studies provide evidence that                                                                                                                                                                                                                                                |

|                         |                                                                                                                                                                                                                                                                                                                       |                                                         |                                                                                                                                                                |                                               |     |    |                                                                                                                                                                                                                                                                                                                                                                                                                                                                                                                                                                                                                                                                                                                  |
|-------------------------|-----------------------------------------------------------------------------------------------------------------------------------------------------------------------------------------------------------------------------------------------------------------------------------------------------------------------|---------------------------------------------------------|----------------------------------------------------------------------------------------------------------------------------------------------------------------|-----------------------------------------------|-----|----|------------------------------------------------------------------------------------------------------------------------------------------------------------------------------------------------------------------------------------------------------------------------------------------------------------------------------------------------------------------------------------------------------------------------------------------------------------------------------------------------------------------------------------------------------------------------------------------------------------------------------------------------------------------------------------------------------------------|
|                         |                                                                                                                                                                                                                                                                                                                       |                                                         |                                                                                                                                                                |                                               |     |    | mepolizumab can lead to an improvement in health-related quality of life scores and reduce asthma exacerbations in people with severe eosinophilic asthma. Further research is needed to clarify which subgroups of patients with asthma could potentially benefit from this treatment. Dosage, ideal dosing regimens and duration of treatment need to be clarified, as the studies included in this review differed in their protocols. There are no studies reporting results from children, so we cannot comment on treatment for this age group. At the present time, larger studies using licenced treatment regimens are required to establish the role of mepolizumab in the treatment of severe asthma. |
| Rajagopalan, 2011, 6347 | Hence, we planned to conduct a systematic review to answer the question whether pharmacotherapy has any beneficial role in the management of HFNEF.                                                                                                                                                                   | Heart failure with normal ejection fraction (EF of 40%) | Angiotensin II receptor blocker or angiotensin converting enzyme inhibitor; Digoxin vs. Placebo                                                                | Total: 6 (8410)<br>Admissions data: 4 (4857)  | No  | 8  | There was no significant benefit of pharmacotherapy in HFNEF. This might have been because of a lack of stringent inclusion criteria for patients in the trials and lower power of the studies. Hence trials with well defined inclusion criteria, better power, longer follow-up periods and with echocardiographic parameters as endpoints are required to shed further light on this topic.                                                                                                                                                                                                                                                                                                                   |
| Renner, 2012, 6442      | To identify, assess, meta-analyze and summarize the evidence concerning the efficacy and safety of primary prophylactic CSFs (GCSFs or GM-CSFs) compared to placebo or no treatment for the prevention of FN, early mortality and infection-related mortality in patients with breast cancer undergoing chemotherapy. | Breast cancer undergoing chemotherapy                   | Primary prophylactic colony-stimulating factors vs. No treatment or placebo                                                                                    | Total: 8 (2156)<br>Admissions data: 4 (1149)  | No  | 11 | In patients with breast cancer receiving chemotherapy, CSFs have shown evidence of benefit in the prevention of FN. There is evidence, though less reliable, of a decrease of all-cause mortality during chemotherapy and a reduced need for hospital care. No reliable evidence was found for a reduction of infection-related mortality, a higher dose intensity of chemotherapy with CSFs or diminished rates of severe neutropenia and infections. The majority of adverse events reported from CSF use were bone pain and injection-site reactions but no conclusions could be drawn regarding late-term side effects.                                                                                      |
| Rodrigo, 1999, 6564     | The objective of this review was to reevaluate the literature on the effectiveness of CCS administration in the treatment of adult patients with acute asthma presenting to an acute-care setting (ie, usually the ED).                                                                                               | Acute asthma                                            | Parenteral or inhaled corticosteroids vs. Parenteral (IV, IM), oral, or inhaled administration of CCSs or placebo                                              | Total: 21 (1049)<br>Admissions data: 6 (480)  | Yes | 8  | This evidence-based evaluation suggests that the administration of parenteral CCSs to the patient on arrival at the emergency department (ED) neither improves airflow obstruction nor reduces the need for hospitalization. Parenteral CCSs probably require > 6 to 24 h to begin to act. Comprehensible conclusions about admission rates in the ED setting are difficult to make. At the 3-h assessment, only high doses of inhaled CCSs (in one study) significantly improved pulmonary function compared with placebo. IV and oral CCSs appear to have equivalent effects, and there is a tendency toward improvement in pulmonary function with medium or high doses.                                      |
| Rodrigo, 2000, 6566     | The purpose of this article was to review the literature to determine whether MgSO <sub>4</sub> provides an additive improvement in adults with acute asthma.                                                                                                                                                         | Acute asthma                                            | Nebulised or parenteral magnesium sulfate vs. Placebo                                                                                                          | Total: 5 (374)<br>Admissions data: 4 (326)    | No  | 7  | The existing evidence reveals that the addition of MgSO <sub>4</sub> to ED patients with moderate to severe asthmatic exacerbations does not alter treatment outcomes. Nevertheless, the number and size of studies being pooled remain small.                                                                                                                                                                                                                                                                                                                                                                                                                                                                   |
| Rodrigo, 2005, 6568     | A review was undertaken to incorporate the more recent evidence available about the effectiveness of treatment with a combination of b <sub>2</sub> agonists and anticholinergics compared with b <sub>2</sub> agonists alone in the treatment of acute asthma.                                                       | Acute asthma                                            | Single or repeated doses of inhaled anticholinergic agents given in combination with inhaled b <sub>2</sub> agonists vs. Inhaled b <sub>2</sub> agonists alone | Total: 32 (3611)<br>Admissions data: 9 (1556) | Yes | 6  | This review strongly suggests that the addition of multiple doses of inhaled ipratropium bromide to b <sub>2</sub> agonists is indicated as the standard treatment in children, adolescents, and adults with moderate to severe exacerbations of asthma in the emergency setting.                                                                                                                                                                                                                                                                                                                                                                                                                                |
| Rodrigo, 2002, 6576     | To determine whether continuous nebulization offered an advantage over intermittent nebulization for the treatment of adults with acute asthma in the emergency department (ED).                                                                                                                                      | Acute asthma                                            | Continuous nebulization of B-agonists vs. Intermittent nebulization of B-agonists                                                                              | Total: 6 (393)<br>Admissions data: 2 (80)     | No  | 6  | Overall, this review supports the equivalence of continuous and intermittent albuterol nebulization in the treatment of acute adult asthma.                                                                                                                                                                                                                                                                                                                                                                                                                                                                                                                                                                      |

|                      |                                                                                                                                                                                                                                                                                                                                                                     |                                                                                                                     |                                                             |                                                  |     |   |                                                                                                                                                                                                                                                                                                                                 |
|----------------------|---------------------------------------------------------------------------------------------------------------------------------------------------------------------------------------------------------------------------------------------------------------------------------------------------------------------------------------------------------------------|---------------------------------------------------------------------------------------------------------------------|-------------------------------------------------------------|--------------------------------------------------|-----|---|---------------------------------------------------------------------------------------------------------------------------------------------------------------------------------------------------------------------------------------------------------------------------------------------------------------------------------|
| Rodrigo, 2003, 6578  | To determine the effect of the addition of heliox to standard medical care on the course of acute asthma.                                                                                                                                                                                                                                                           | Acute asthma presenting to an emergency department (ED) or equivalent care settings                                 | Helium-oxygen gas mixture vs. Oxygen/air                    | Total: 6 (347)<br>Admissions data: 4 (306)       | No  | 7 | The existing evidence does not provide support for the administration of heliumoxygen mixtures to emergency department patients with moderate-to-severe acute asthma. However, these conclusions are based on between-group comparisons and small studies, and these results should be interpreted with caution.                |
| Rowe, 2000, 6670     | This systematic review examined the effect of intravenous magnesium sulfate used for patients with acute asthma managed in the emergency department.                                                                                                                                                                                                                | Acute asthma presenting to an emergency department                                                                  | Intravenous magnesium sulfate vs. Placebo                   | Total: 7 (668)<br>Admissions data: 5 (590)       | Yes | 8 | Current evidence does not clearly support routine use of intravenous magnesium sulfate in all patients with acute asthma presenting to the ED. However, magnesium sulfate appears to be safe and beneficial for patients who present with severe acute asthma. Practice guidelines need to be changed to reflect these results. |
| Rowe, 1992, 6672     | The objective of this study was to determine the effect of steroid therapy on pulmonary function, admission rates, and relapse rates in patients presenting with acute exacerbations of asthma.                                                                                                                                                                     | Acute exacerbations of asthma                                                                                       | Parenteral or oral glucocorticoids vs. Not specified        | Total: 30 (unclear)<br>Admissions data: 3 (252)  | No  | 6 | The authors conclude that overall, steroid therapy provides important benefits to patients presenting to emergency departments with acute exacerbations of asthma. Further research into dosage, alternative routes of administration, and alternative outcome measures is needed.                                              |
| Rowe, 2001, 6676     | To determine the benefit of treating patients with acute asthma with systemic corticosteroids within an hour of presenting to the emergency department (ED).                                                                                                                                                                                                        | Acute asthma in the emergency department                                                                            | Systemic corticosteroids vs. IV saline or placebo           | Total: 12 (863)<br>Admissions data: 12 (863)     | Yes | 9 | Use of corticosteroids within 1 hour of presentation to an ED significantly reduces the need for hospital admission in patients with acute asthma. Benefits appear greatest in patients with more severe asthma, and those not currently receiving steroids. Children appear to respond well to oral steroids.                  |
| Rowe, 2007, 6677     | To determine the benefit of corticosteroids (oral, intramuscular, or intravenous) for the treatment of asthmatic patients discharged from an acute care setting (i.e. usually the emergency department) after assessment and treatment of an acute asthmatic exacerbation.                                                                                          | Asthmatic exacerbations                                                                                             | Outpatient oral or Intramuscular corticosteroid vs. Placebo | Total: 6 (374)<br>Admissions data: 4 (210)       | No  | 8 | A short course of corticosteroids following assessment for an asthma exacerbation significantly reduces the number of relapses to additional care, hospitalizations and use of short-acting beta2-agonist without an apparent increase in side effects. Intramuscular and oral corticosteroids are both effective.              |
| Saab, 2015, 8884     | The aim of this study was to evaluate the efficacy of probiotics in the management of minimal hepatic encephalopathy HE (MHE) and overt HE (OHE) in comparison to no treatment/placebo and lactulose.                                                                                                                                                               | Hepatic encephalopathy                                                                                              | Probiotics vs. No treatment, placebo, or lactulose          | Total: 14 (1152)<br>Admissions data: 5 (524)     | Yes | 4 | Overall the use of probiotics was more effective in decreasing hospitalization rates, improving MHE and preventing progression to OHE in patients with underlying MHE than placebo, but similar to that seen with lactulose. The use of probiotics did not affect mortality rates.                                              |
| Saha, 2007, 6746     | We, therefore, conducted a systematic review and meta-analysis of randomized placebo-controlled clinical trials to evaluate the role of tissue ACE inhibitors for secondary prevention of cardiovascular events in patients with preserved ventricular function.                                                                                                    | Patients with preserved left ventricular function                                                                   | Tissue angiotensin-converting enzyme inhibitors vs. Placebo | Total: 4 (31555)<br>Admissions data: 4 (31555)   | No  | 4 | Tissue ACE inhibitors have demonstrated benefit when used for secondary prevention of cardiovascular disease in patients with preserved left ventricular function in randomized placebo-controlled clinical trials.                                                                                                             |
| Saha, 2008, 6747     | The aim of this study was to determine the role of tissue angiotensin-converting enzyme (ACE) inhibitors in the prevention of cardiovascular disease in patients with diabetes mellitus without left ventricular systolic dysfunction or clinical evidence of heart failure in randomized placebo-controlled clinical trials using pooled meta-analysis techniques. | Patients with diabetes mellitus without left ventricular systolic dysfunction or clinical evidence of heart failure | Tissue angiotensin-converting enzyme inhibitors vs. Placebo | Total: 4 (10328)<br>Admissions data: 4 (9991)    | No  | 4 | Pooled meta-analysis of randomized placebo-controlled trials suggests that tissue ACE inhibitors modestly reduce the risk of myocardial infarction and cardiovascular death and tend to reduce overall mortality in diabetic patients without left ventricular systolic dysfunction or heart failure.                           |
| Salpeter, 2006, 6795 | The objective of our study was to assess the effect of long-acting -agonists on severe asthma exacerbations requiring hospitalization, life-threatening asthma attacks, and asthma-related deaths. We used subgroup analyses to compare results for salmeterol and formoterol and for children and adults.                                                          | Asthma                                                                                                              | Long acting beta agonists vs. Placebo                       | Total: 47 (unclear)<br>Admissions data: 9 (3772) | Yes | 6 | Long-acting beta-agonists have been shown to increase severe and life-threatening asthma exacerbations, as well as asthma related deaths.                                                                                                                                                                                       |

|                            |                                                                                                                                                                                                                                                                                                                                                                                                                                                                                                    |                                                                           |                                                                                                                         |                                                         |     |    |                                                                                                                                                                                                                                                                                                                                                                                                                                                                           |
|----------------------------|----------------------------------------------------------------------------------------------------------------------------------------------------------------------------------------------------------------------------------------------------------------------------------------------------------------------------------------------------------------------------------------------------------------------------------------------------------------------------------------------------|---------------------------------------------------------------------------|-------------------------------------------------------------------------------------------------------------------------|---------------------------------------------------------|-----|----|---------------------------------------------------------------------------------------------------------------------------------------------------------------------------------------------------------------------------------------------------------------------------------------------------------------------------------------------------------------------------------------------------------------------------------------------------------------------------|
| Salpeter, 2006, 6797       | The objective of this meta-analysis is to compare the effects of b2-agonists and anticholinergics on exacerbations requiring withdrawal from the trial, severe exacerbations requiring hospitalization, and respiratory deaths in patients with COPD.                                                                                                                                                                                                                                              | Chronic obstructive pulmonary disease                                     | B2-agonists or anticholinergics vs. Placebo or anticholinergics                                                         | Total: 22 (15276)<br>Admissions data: unclear (unclear) | Yes | 6  | Inhaled anticholinergics significantly reduced severe exacerbations and respiratory deaths in patients with COPD, while b2-agonists were associated with an increased risk for respiratory deaths. This suggests that anticholinergics should be the bronchodilator of choice in patients with COPD, and b2-agonists may be associated with worsening of disease control                                                                                                  |
| Sampson, 2013, 6806        | To review the effects of different intermittent drug techniques compared with maintenance treatment (as defined by the trial authors) in people with schizophrenia or related disorders.                                                                                                                                                                                                                                                                                                           | Schizophrenia and other types of schizophrenia-like psychoses             | Any intermittent drug technique vs. Maintenance therapy                                                                 | Total: 17 (2252)<br>Admissions data: 6 (661)            | Yes | 11 | Results of this reviewsupport the existing evidence that intermittent antipsychotic treatment is not as effective as continuous,maintained antipsychotic therapy in preventing relapse in people with schizophrenia. More research is needed to assess any potential benefits or harm of intermittent treatment regarding adverse effects typically associated with maintained antipsychotic treatment, as well as any cost-effectiveness of this experimental treatment. |
| Shan, 2013, 7029           | We therefore aimed to undertake a systematic review and meta-analysis of both intravenous and nebulized magnesium sulfate to determine their roles in adults and children with acute asthma.                                                                                                                                                                                                                                                                                                       | Asthma                                                                    | Intravenous or nebulized magnesium sulfate as an adjuvant in combination with b2-agonists vs. B2-agonists & placebo     | Total: 25 (1754)<br>Admissions data: 6 (383)            | Yes | 6  | The use of intravenous magnesium sulfate, in addition to b2-agonists and systemic steroids, in the treatment of acute asthma appears to produce benefits with respect to improve pulmonary function and reduce the number of hospital admissions for children, and only improve pulmonary function for adults. However, the use of nebulized magnesium sulfate just appears to produce benefits for adults.                                                               |
| Stratton, 2013, 7484       | Therefore, this systematic review aimed to critically reviewand synthesise the literature to assess the impact of oral nutri-tional supplements used in the community setting across all patientgroups on hospital admissions and readmissions (indicated as (re)admissions).                                                                                                                                                                                                                      | Malnourished patients being discharged from the hospital to the community | Oral nutritional supplements vs. Usual care or dietary counselling                                                      | Total: 9 (1190)<br>Admissions data: 6 (852)             | Yes | 6  | This systematic review shows that ONS significantly reduce hospital (re)admissions, particularly in older patient groups, with economic implications for health care.                                                                                                                                                                                                                                                                                                     |
| Su, 2014, 7504             | In order to provide a scientific basis for clinical use of nitroprusside, it is necessary to evaluate the drug efficacy and safety in preventing no-flow using the method of the Cochrane systematic review.                                                                                                                                                                                                                                                                                       | Acute myocardial infarction                                               | Nitroprusside vs. Placebo (including the blank control, saline, and nitroglycerin)                                      | Total: 4 (169)<br>Admissions data: 2 (190)              | No  | 6  | The results of the meta-analyses showed that intracoronary nitroprusside is beneficial in preventing no-reflow/slow-flow, in reducing corrected TIMI frame count, and in improving left ventricular ejection fraction. It also likely reduces adverse reactions in patients after PCI and rehospitalization due to cardiovascular events.                                                                                                                                 |
| Susantitaphong, 2013, 7543 | The Canadian Heart and Stroke Foundation clinical guidelines now recommend that combined RAAS blockade therapy be discontinued for the treatment of hypertension.21 In light of scarce data on the potentially deleterious effect of combined RAAS blockade therapy on kidney-related endpoints in patients with CKD, we conducted a meta-analysis of all randomized controlled trials (RCTs) comparing the efficacy and safety of combined vs. single RAAS blockade therapy in patients with CKD. | Chronic kidney disease                                                    | Combined renin angiotensin aldosterone system blockade therapy vs. Single renin-angiotensin aldosterone system blockade | Total: 59 (4975)<br>Admissions data: 5 (326)            | No  | 7  | Although combined RAAS blockade therapy in CKD is associated with a decrease in albuminuria and proteinuria, it is associated with a decrease in GFR and a higher incidence of hyperkalemia and hypotension relative to monotherapy. The potential long-term kidney benefits of combined RAAS blockade therapy require further study.                                                                                                                                     |
| Taylor, 2001, 7647         | To examine the benefits and risks of long term anticoagulation (warfarin) compared with antiplatelet treatment (aspirin/indoprofen) in patients with non-rheumatic atrial fibrillation.                                                                                                                                                                                                                                                                                                            | Nonrheumatic atrial fibrillation                                          | Long term anticoagulation vs. Antiplatelet treatment                                                                    | Total: 5 (3298)<br>Admissions data: 5 (3298)            | No  | 6  | The heterogeneity between the trials and the limited data result in considerable uncertainty about the value of long term anticoagulation compared with antiplatelet treatment. The risks of bleeding and the higher cost of anticoagulation make it an even less convincing treatment option.                                                                                                                                                                            |
| Tonelli, 2008, 7787        | The aim of this review was to assess the evidence for clinical efficacy and harms and the economic implications of ESA use in adult patients with anemia of CKD.                                                                                                                                                                                                                                                                                                                                   | Patients with anemia of chronic kidney disease                            | Erythropoiesis-Stimulating Agents (Epoetin (alpha and beta) or darbepoetin) targeting high haemoglobin vs.              | Total: 10 (1553)<br>Admissions data: 4 (3143)           | No  | 11 | In an environment where decision makers are willing to reimburse ESA, our base case analysis suggests that treatment to a target Hb of 110 g/L is most likely to be cost-effective. This strategy, however, will lead to higher costs (mainly due to ESA acquisition) compared to the low Hb target strategy, and it is based on the assumption that the intermediate target will improve QoL                                                                             |

|                     |                                                                                                                                                                                                                                                           |                                                                              |                                                                                                                                                                                                                                                                                                                                                                                             |                                                  |     |    |                                                                                                                                                                                                                                                                                                                                                                                                                                                                                                                                                                                                                                                                                                                                                                                                                                                                                                         |
|---------------------|-----------------------------------------------------------------------------------------------------------------------------------------------------------------------------------------------------------------------------------------------------------|------------------------------------------------------------------------------|---------------------------------------------------------------------------------------------------------------------------------------------------------------------------------------------------------------------------------------------------------------------------------------------------------------------------------------------------------------------------------------------|--------------------------------------------------|-----|----|---------------------------------------------------------------------------------------------------------------------------------------------------------------------------------------------------------------------------------------------------------------------------------------------------------------------------------------------------------------------------------------------------------------------------------------------------------------------------------------------------------------------------------------------------------------------------------------------------------------------------------------------------------------------------------------------------------------------------------------------------------------------------------------------------------------------------------------------------------------------------------------------------------|
|                     |                                                                                                                                                                                                                                                           |                                                                              | Intermediate or low target haemoglobin protocols                                                                                                                                                                                                                                                                                                                                            |                                                  |     |    | compared with the low target, which is unproven. Given the generally modest clinical benefit of ESA and the direct relationship between dose and cost, it may be prudent to consider a maximum ESA dose (above which the dose would not be increased further, even if the Hb target were not reached). Future research should focus on this comparison. In the interim, decision makers might reasonably choose to reimburse only the low Hb strategy because of the uncertainty in the quality-of-life gains associated with the intermediate strategy. Because of the higher cost of IV epoetin, the merits of reimbursing only SC epoetin (or darbopoetin by either route) should be explored. Lastly, because even small differences in potency per unit cost of ESA can translate into large differences in total costs, head-to-head comparisons of epoetin and darbopoetin should be considered. |
| Walters, 2014, 8704 | To assess the effects of corticosteroids administered orally or parenterally for treatment of acute exacerbations of COPD, and to compare the efficacy of parenteral versus oral administration                                                           | Chronic obstructive pulmonary disease                                        | Intravenous corticosteroid vs. Oral corticosteroid                                                                                                                                                                                                                                                                                                                                          | Total: 20 (2078)<br>Admissions data: 5 (unclear) | Yes | 10 | There is high-quality evidence to support treatment of exacerbations of COPD with systemic corticosteroid by the oral or parenteral route in reducing the likelihood of treatment failure and relapse by one month, shortening length of stay in hospital inpatients not requiring assisted ventilation in ICU and giving earlier improvement in lung function and symptoms. There is no evidence of benefit for parenteral treatment compared with oral treatment with corticosteroid on treatment failure, relapse or mortality. There is an increase in adverse drug effects with corticosteroid treatment, which is greater with parenteral administration compared with oral treatment.                                                                                                                                                                                                            |
| Wilt, 2007, 8367    | To evaluate the effectiveness of COPD management strategies.                                                                                                                                                                                              | Stable chronic obstructive pulmonary disease                                 | 1) inhaled medications (2-agonists, anticholinergics, combination 2-agonists and anticholinergics, inhaled corticosteroids, and combination inhaled corticosteroids and long-acting 2-agonists or anticholinergics), 2) pulmonary rehabilitation, 3) disease management programs, and 4) oxygen therapy.<br>vs.<br>Placebo; long-acting beta2-agonists; inhaled corticosteroids; tiotropium | Total: 42 (41932)<br>Admissions data: 12 (20540) | No  | 8  | Long-acting inhaled therapies, supplemental oxygen, and pulmonary rehabilitation are beneficial in adults who have bothersome respiratory symptoms, especially dyspnea, and FEV1 less than 60% predicted.                                                                                                                                                                                                                                                                                                                                                                                                                                                                                                                                                                                                                                                                                               |
| Xie, 2016, 8916     | Renin-angiotensin-aldosterone system(RAAS) blockers are effective therapies for heart failure and reduced ejection fraction (HFrEF) or left ventricular dysfunction (LVD). We aimed to assess the efficacy and safety of RAAS blockers in these patients. | Heart failure with reduced ejection fraction or left ventricular dysfunction | Renin-angiotensin-aldosterone system blockade: Angiotensin converting enzyme inhibitor; Angiotensin II receptor blocker; Aldosterone antagonists ; Direct renin inhibitor vs. Angiotensin-converting enzyme inhibitor; angiotensin II receptor blockers                                                                                                                                     | Total: 21 (69229)<br>Admissions data: 20 (68976) | No  | 5  | ARNI has the highest probability of being the most efficacious therapy for HFrEF in reducing death and hospitalization for heart failure. ARA has the most favorable benefit-risk profile as an adjunct to background ACEI and/or ARB therapy.                                                                                                                                                                                                                                                                                                                                                                                                                                                                                                                                                                                                                                                          |

|                      |                                                                                                                                                                                                                                                                                                                                                                                                            |                                                                                                                  |                                                                                                                                                             |                                                           |     |   |                                                                                                                                                                                                                                                                                                                                                            |
|----------------------|------------------------------------------------------------------------------------------------------------------------------------------------------------------------------------------------------------------------------------------------------------------------------------------------------------------------------------------------------------------------------------------------------------|------------------------------------------------------------------------------------------------------------------|-------------------------------------------------------------------------------------------------------------------------------------------------------------|-----------------------------------------------------------|-----|---|------------------------------------------------------------------------------------------------------------------------------------------------------------------------------------------------------------------------------------------------------------------------------------------------------------------------------------------------------------|
| Yang, 2015, 8918     | To assess the use of current prophylactic antibiotics in patients undergoing TRPB, we conducted a systematic review and meta-analysis to clarify which type, dose, route, and duration of antibiotics are the most appropriate and effective.                                                                                                                                                              | Prostate biopsy                                                                                                  | Short course, single dose, or oral prophylactic antibiotics vs. Long course, multiple dose, systemically administered, or combined prophylactic antibiotics | Total: 22 (3846)<br>Admissions data: 13 (2739)            | No  | 8 | Prophylactic antibiotics could be beneficial for the reduction of infective complications after TRPB. Single-dose or short-course oral administration with any type of antibiotic appears to be optimal. One additional type of antibiotic added to the basic antibiotic agent may contribute to the minimization of severe infection and drug resistance. |
| Yohannes, 2011, 8511 | Therefore, we undertook a meta-analysis of randomized controlled trials (RCTs) to evaluate the efficacy of tiotropium on clinically relevant outcomes to patients with COPD, including health-related quality of life, dyspnea, adverse events, and clinical events (COPD exacerbations and related hospitalizations) compared to placebo, ipratropium bromide, and long-acting $\beta_2$ agonists (LABA). | Chronic obstructive pulmonary disease                                                                            | Tiotropium vs. Placebo, ipratropium bromide, or long-acting beta agonists (LABA, salmeterol, or formoterol)                                                 | Total: 16 (16301)<br>Admissions data: 9 (12379)           | Yes | 7 | )In stable COPD, tiotropium showed superior efficacy in improving quality of life and dyspnea, compared to placebo and ipratropium. However, tiotropium's differences with salmeterol were less clear.                                                                                                                                                     |
| Zhang, 2011, 8604    | This study aimed to investigate the effect of statins on clinical outcomes of chronic systolic heart failure (CHF) by a meta-analysis based on randomized controlled trials (RCTs).                                                                                                                                                                                                                        | Chronic systolic heart failure                                                                                   | Statins vs. Placebo or blank in addition to contemporary standard therapy of CHF (no statin treatment).                                                     | Total: 13 (10447)<br>Admissions data: 11 (10135)          | No  | 6 | Although statin has little impact on clinical outcomes in overall CHF patients, statin administration if needed is feasible to CHF patients, and the treatment might be effective when restricted to specific statins or populations.                                                                                                                      |
| Zhang, 2016, 8922    | This meta-analysis was designed to assess the role of RAAS inhibitors on mortality, hospitalization, diastolic function, and exercise capacity in patients with HFpEF.                                                                                                                                                                                                                                     | Heart failure with preserved ejection fraction (defined as signs or symptoms of heart failure with an EF > 40 %) | Renin-angiotensin-aldosterone system inhibitors vs. Placebo or diuretics                                                                                    | Total: 13 (12532)<br>Admissions data: 11 (12308)          | No  | 5 | This meta-analysis shows that RAAS inhibitors could significantly reduce heart failure-related hospitalization and improve the E/e' index in patients with HFpEF. Further large-scale randomized controlled trials, especially on diastolic function, are needed to confirm the effects of RAAS inhibitors in patients with HFpEF.                         |
| Zhang, 2014, 9143    | In this systematic review and meta-analysis, we weighed the relative effect size of montelukast for preventing asthma exacerbations under different standard treatment conditions and determined whether montelukast is effective in the treatment of acute asthma in adults                                                                                                                               | Chronic asthma or acute asthma                                                                                   | Montelukast and long acting beta 2 agonists vs. Long acting beta 2 agonists alone                                                                           | Total: 26 (unclear)<br>Admissions data: unclear (unclear) | No  | 6 | Montelukast had low risk in hoarseness and insomnia. Our meta-analysis suggests that montelukast significantly reduces mild, moderate, and part of severe exacerbations in chronic mild to moderate asthma, but it has inferior efficacy to ICS or ICS plus LABA.                                                                                          |
| Zhou, 2014, 8928     | We therefore performed a meta-analysis of randomized controlled trials (RCTs) to evaluate the effects of TMZ treatment in CHF patients.                                                                                                                                                                                                                                                                    | Chronic heart failure                                                                                            | Trimetazidine vs. Placebo                                                                                                                                   | Total: 19 (1042)<br>Admissions data: 4 (130)              | No  | 4 | TMZ treatment in CHF patients may improve clinical symptoms and cardiac function, reduce hospitalization for cardiac causes, and decrease serum levels of BNP and CRP.                                                                                                                                                                                     |
| Ziff, 2015, 8931     | To clarify the impact of digoxin on death and clinical outcomes across all observational and randomised controlled trials, accounting for study designs and methods.                                                                                                                                                                                                                                       | Not specified (RCTs were all heart failure patients)                                                             | Digoxin vs. Placebo                                                                                                                                         | Total: 7 (8406)<br>Admissions data: 2 (7788)              | No  | 7 | Digoxin is associated with a neutral effect on mortality in randomised trials and a lower rate of admissions to hospital across all study types. Regardless of statistical analysis, prescription biases limit the value of observational data.                                                                                                            |
| Zou, 2016, 8933      | This meta-analysis assessed the efficacy of acclidinium bromide with respect to clinical events, health-related quality of life and symptom scales, pulmonary function, and safety among patients with stable COPD.                                                                                                                                                                                        | Moderate-to-severe chronic obstructive pulmonary disease                                                         | Acclidinium Bromide vs. Placebo                                                                                                                             | Total: 7 (7001)<br>Admissions data: 7 (2601)              | Yes | 8 | Acclidinium reduced the incidence of exacerbation-related hospitalizations and improved quality of life, COPD symptoms and pulmonary function. In addition, acclidinium did not increase the incidence of non-fatal serious adverse events, cardiac adverse events, or COPD exacerbations and was not associated with increased mortality.                 |



**Table S5. Full Results for AMSTAR Review Quality Assessment**

| Author         | Year | Review ID | Criteria 1                       | Criteria 2                                          | Criteria 3                                       | Criteria 4                                             | Criteria 5                                            | Criteria 6                                             | Criteria 7                                                              | Criteria 8                                                                                    | Criteria 9                                                                    | Criteria 10                                      | Criteria 11                              | Overall              |
|----------------|------|-----------|----------------------------------|-----------------------------------------------------|--------------------------------------------------|--------------------------------------------------------|-------------------------------------------------------|--------------------------------------------------------|-------------------------------------------------------------------------|-----------------------------------------------------------------------------------------------|-------------------------------------------------------------------------------|--------------------------------------------------|------------------------------------------|----------------------|
|                |      |           | Was an a priori design provided? | Was there duplicate study selection and extraction? | Was a comprehensive literature search performed? | Was there a search for grey or unpublished literature? | Was a list of included and excluded studies provided? | Were the characteristics of included studies provided? | Was the scientific quality of included studies assessed and documented? | Was the scientific quality of included studies used appropriately in formulating conclusions? | Were the methods used to combine the results of included studies appropriate? | Was the likelihood of publication bias assessed? | Were conflicts of interest acknowledged? | Summary AMSTAR score |
| Afilalo        | 2007 | 100       | No                               | Yes                                                 | Yes                                              | Yes                                                    | No                                                    | Yes                                                    | Yes                                                                     | No                                                                                            | Yes                                                                           | No                                               | No                                       | 6                    |
| Ahmed          | 2014 | 129       | No                               | Yes                                                 | Yes                                              | No                                                     | No                                                    | Yes                                                    | Yes                                                                     | Yes                                                                                           | Yes                                                                           | No                                               | No                                       | 6                    |
| Akioyamen      | 2016 | 8711      | Yes                              | No                                                  | Yes                                              | No                                                     | No                                                    | Yes                                                    | Yes                                                                     | Yes                                                                                           | Yes                                                                           | Yes                                              | No                                       | 7                    |
| Anderson       | 2015 | 8714      | Yes                              | Yes                                                 | Yes                                              | Yes                                                    | Yes                                                   | Yes                                                    | Yes                                                                     | Yes                                                                                           | Yes                                                                           | Yes                                              | Yes                                      | 11                   |
| Assasi         | 2009 | 378       | Yes                              | No                                                  | Yes                                              | Yes                                                    | Yes                                                   | Yes                                                    | Yes                                                                     | Yes                                                                                           | Yes                                                                           | No                                               | Yes                                      | 9                    |
| Badve          | 2011 | 446       | No                               | No                                                  | Yes                                              | Yes                                                    | No                                                    | Yes                                                    | No                                                                      | Yes                                                                                           | Yes                                                                           | No                                               | No                                       | 5                    |
| Baigent        | 2013 | 1653      | No                               | Yes                                                 | Yes                                              | Yes                                                    | No                                                    | No                                                     | Yes                                                                     | Yes                                                                                           | Yes                                                                           | No                                               | No                                       | 6                    |
| Barr           | 2006 | 548       | Yes                              | Yes                                                 | Yes                                              | Yes                                                    | Yes                                                   | Yes                                                    | Yes                                                                     | Yes                                                                                           | Yes                                                                           | Yes                                              | Yes                                      | 10                   |
| Baumeister     | 2011 | 593       | Yes                              | Yes                                                 | Yes                                              | Yes                                                    | Yes                                                   | Yes                                                    | Yes                                                                     | Yes                                                                                           | Yes                                                                           | Yes                                              | Yes                                      | 11                   |
| Beck           | 2013 | 615       | No                               | No                                                  | No                                               | No                                                     | Yes                                                   | Yes                                                    | Yes                                                                     | Yes                                                                                           | Yes                                                                           | No                                               | No                                       | 5                    |
| Blitz          | 2005 | 813       | No                               | No                                                  | Yes                                              | Yes                                                    | No                                                    | Yes                                                    | Yes                                                                     | No                                                                                            | Yes                                                                           | No                                               | No                                       | 5                    |
| Bonsu          | 2016 | 8729      | Yes                              | Yes                                                 | Yes                                              | Yes                                                    | No                                                    | Yes                                                    | Yes                                                                     | Yes                                                                                           | Yes                                                                           | Yes                                              | No                                       | 9                    |
| Briasoulis     | 2015 | 8731      | No                               | No                                                  | Yes                                              | No                                                     | No                                                    | Yes                                                    | Yes                                                                     | Yes                                                                                           | Yes                                                                           | Yes                                              | No                                       | 6                    |
| Brophy         | 2001 | 1021      | No                               | No                                                  | No                                               | No                                                     | No                                                    | Yes                                                    | Yes                                                                     | Yes                                                                                           | Yes                                                                           | No                                               | No                                       | 4                    |
| Burch          | 2009 | 1080      | Yes                              | No                                                  | Yes                                              | Yes                                                    | Yes                                                   | Yes                                                    | Yes                                                                     | Yes                                                                                           | Yes                                                                           | No                                               | No                                       | 8                    |
| Cammarano      | 2016 | 8735      | No                               | No                                                  | No                                               | No                                                     | No                                                    | Yes                                                    | Yes                                                                     | Yes                                                                                           | Yes                                                                           | No                                               | No                                       | 4                    |
| Campschroer    | 2014 | 1164      | Yes                              | Yes                                                 | Yes                                              | Yes                                                    | Yes                                                   | Yes                                                    | Yes                                                                     | Yes                                                                                           | Yes                                                                           | Yes                                              | No                                       | 10                   |
| Cates          | 2013 | 1249      | Yes                              | No                                                  | Yes                                              | Yes                                                    | Yes                                                   | Yes                                                    | Yes                                                                     | Yes                                                                                           | Yes                                                                           | Yes                                              | No                                       | 9                    |
| Cawood         | 2012 | 1264      | No                               | No                                                  | Yes                                              | Yes                                                    | Yes                                                   | Yes                                                    | Yes                                                                     | Yes                                                                                           | Yes                                                                           | No                                               | No                                       | 7                    |
| Ceron-Litvoc   | 2009 | 1281      | No                               | No                                                  | Yes                                              | Yes                                                    | Yes                                                   | No                                                     | Yes                                                                     | No                                                                                            | Yes                                                                           | No                                               | No                                       | 5                    |
| Chauhan        | 2012 | 1348      | Yes                              | Yes                                                 | Yes                                              | Yes                                                    | Yes                                                   | Yes                                                    | Yes                                                                     | Yes                                                                                           | Yes                                                                           | Yes                                              | Yes                                      | 11                   |
| Chauhan        | 2014 | 8681      | Yes                              | No                                                  | Yes                                              | Yes                                                    | Yes                                                   | Yes                                                    | Yes                                                                     | Yes                                                                                           | Yes                                                                           | Yes                                              | No                                       | 9                    |
| Chen           | 2015 | 8742      | Yes                              | No                                                  | Yes                                              | Yes                                                    | No                                                    | Yes                                                    | Yes                                                                     | Yes                                                                                           | Yes                                                                           | Yes                                              | No                                       | 8                    |
| Cheyne         | 2015 | 8744      | Yes                              | Yes                                                 | Yes                                              | Yes                                                    | Yes                                                   | Yes                                                    | Yes                                                                     | Yes                                                                                           | Yes                                                                           | No                                               | Yes                                      | 10                   |
| Chong          | 2012 | 1438      | Yes                              | Yes                                                 | Yes                                              | Yes                                                    | Yes                                                   | Yes                                                    | Yes                                                                     | Yes                                                                                           | Yes                                                                           | No                                               | Yes                                      | 10                   |
| Coeytaux       | 2014 | 8747      | Yes                              | No                                                  | No                                               | No                                                     | No                                                    | No                                                     | No                                                                      | Yes                                                                                           | Yes                                                                           | Yes                                              | No                                       | 5                    |
| Cordina        | 2005 | 1606      | No                               | No                                                  | Yes                                              | Yes                                                    | Yes                                                   | Yes                                                    | Yes                                                                     | Yes                                                                                           | Yes                                                                           | Yes                                              | No                                       | 8                    |
| Costa          | 2013 | 1629      | Yes                              | No                                                  | Yes                                              | Yes                                                    | No                                                    | Yes                                                    | Yes                                                                     | Yes                                                                                           | Yes                                                                           | Yes                                              | No                                       | 8                    |
| Danchin        | 2006 | 1752      | Yes                              | No                                                  | Yes                                              | Yes                                                    | No                                                    | Yes                                                    | Yes                                                                     | Yes                                                                                           | Yes                                                                           | Yes                                              | No                                       | 8                    |
| DiNicolantonio | 2013 | 1991      | No                               | No                                                  | Yes                                              | No                                                     | Yes                                                   | Yes                                                    | Yes                                                                     | No                                                                                            | Yes                                                                           | No                                               | No                                       | 5                    |
| Doyle          | 2009 | 2055      | Yes                              | No                                                  | Yes                                              | Yes                                                    | No                                                    | Yes                                                    | Yes                                                                     | Yes                                                                                           | Yes                                                                           | Yes                                              | No                                       | 8                    |
| Ducharme       | 2010 | 2095      | Yes                              | Yes                                                 | Yes                                              | Yes                                                    | Yes                                                   | Yes                                                    | Yes                                                                     | Yes                                                                                           | Yes                                                                           | Yes                                              | Yes                                      | 11                   |
| Ebell          | 2013 | 2148      | Yes                              | Yes                                                 | Yes                                              | Yes                                                    | Yes                                                   | Yes                                                    | Yes                                                                     | No                                                                                            | Yes                                                                           | No                                               | Yes                                      | 9                    |
| Edmonds        | 2012 | 2158      | Yes                              | Yes                                                 | Yes                                              | Yes                                                    | Yes                                                   | Yes                                                    | Yes                                                                     | Yes                                                                                           | Yes                                                                           | No                                               | No                                       | 9                    |
| Edmonds        | 2012 | 2159      | Yes                              | Yes                                                 | Yes                                              | Yes                                                    | Yes                                                   | Yes                                                    | Yes                                                                     | No                                                                                            | Yes                                                                           | Yes                                              | No                                       | 9                    |
| Ezekowitz      | 2009 | 2304      | No                               | No                                                  | Yes                                              | Yes                                                    | No                                                    | Yes                                                    | Yes                                                                     | No                                                                                            | Yes                                                                           | Yes                                              | No                                       | 6                    |

|             |      |      |     |     |     |     |     |     |     |     |     |     |     |     |    |
|-------------|------|------|-----|-----|-----|-----|-----|-----|-----|-----|-----|-----|-----|-----|----|
| Farne       | 2015 | 8767 | Yes | Yes | Yes | Yes | Yes | Yes | Yes | Yes | Yes | Yes | No  | Yes | 10 |
| Filippini   | 2003 | 2402 | Yes | Yes | No  | Yes | No  | Yes | Yes | Yes | Yes | Yes | No  | No  | 7  |
| Fisher      | 2014 | 8769 | Yes | Yes | Yes | Yes | Yes | Yes | Yes | Yes | Yes | Yes | Yes | Yes | 11 |
| Fisher      | 2015 | 8770 | No  | Yes | No  | No  | No  | Yes | Yes | Yes | Yes | Yes | Yes | Yes | 7  |
| Fisher      | 2015 | 8771 | Yes | Yes | Yes | Yes | Yes | Yes | Yes | Yes | Yes | Yes | Yes | Yes | 11 |
| Fox         | 2011 | 2496 | No  | No  | Yes | No  | No  | Yes | Yes | Yes | Yes | Yes | No  | No  | 5  |
| Fu          | 2012 | 2549 | No  | Yes | Yes | Yes | No  | No  | Yes | Yes | Yes | Yes | Yes | No  | 7  |
| Gandhi      | 2014 | 2599 | No  | Yes | Yes | Yes | No  | Yes | Yes | Yes | Yes | Yes | Yes | No  | 8  |
| Gao         | 2014 | 8775 | No  | Yes | No  | No  | No  | Yes | Yes | Yes | Yes | Yes | Yes | No  | 6  |
| Garside     | 2007 | 2640 | Yes | Yes | Yes | Yes | Yes | Yes | Yes | Yes | Yes | Yes | No  | Yes | 10 |
| Grimwade    | 2003 | 2933 | Yes | Yes | Yes | Yes | Yes | Yes | Yes | Yes | Yes | Yes | No  | No  | 9  |
| Grooten     | 2015 | 8780 | No  | No  | Yes | Yes | No  | Yes | Yes | Yes | Yes | Yes | Yes | No  | 7  |
| Hemkens     | 2016 | 8784 | Yes | Yes | Yes | Yes | Yes | Yes | Yes | Yes | Yes | Yes | Yes | Yes | 11 |
| Heran       | 2012 | 3275 | Yes | Yes | Yes | Yes | Yes | Yes | Yes | Yes | Yes | Yes | Yes | No  | 10 |
| Hood        | 2014 | 3415 | Yes | No  | Yes | Yes | Yes | Yes | Yes | Yes | No  | Yes | No  | No  | 7  |
| Jaeschke    | 2008 | 3639 | No  | Yes | Yes | Yes | Yes | Yes | Yes | No  | No  | No  | No  | No  | 5  |
| Jaeschke    | 2008 | 3640 | No  | Yes | No  | Yes | No  | Yes | No  | No  | No  | Yes | No  | No  | 4  |
| James       | 2008 | 3657 | No  | Yes | Yes | Yes | No  | Yes | Yes | No  | No  | Yes | Yes | No  | 7  |
| Jankowska   | 2016 | 8790 | No  | No  | Yes | Yes | No  | Yes | Yes | Yes | Yes | Yes | No  | No  | 6  |
| Jefferson   | 2014 | 3696 | Yes | Yes | Yes | Yes | Yes | Yes | Yes | Yes | Yes | Yes | Yes | Yes | 11 |
| Jong        | 2002 | 3781 | Yes | No  | Yes | No  | No  | Yes | Yes | No  | Yes | Yes | Yes | No  | 6  |
| Kang        | 2007 | 3877 | No  | No  | Yes | No  | Yes | Yes | Yes | Yes | No  | Yes | Yes | No  | 6  |
| Kang        | 2008 | 3879 | No  | Yes | Yes | No  | Yes | Yes | Yes | No  | Yes | Yes | Yes | No  | 7  |
| Kansagara   | 2013 | 3885 | No  | Yes | Yes | Yes | No  | Yes | Yes | Yes | Yes | Yes | Yes | No  | 8  |
| Karner      | 2011 | 3908 | Yes | Yes | Yes | Yes | Yes | Yes | Yes | Yes | Yes | Yes | No  | Yes | 10 |
| Karner      | 2014 | 8692 | Yes | Yes | Yes | Yes | Yes | Yes | Yes | Yes | Yes | Yes | Yes | No  | 10 |
| Kaur        | 2014 | 3937 | No  | Yes | Yes | Yes | No  | Yes | Yes | No  | Yes | Yes | Yes | No  | 7  |
| Kew         | 2014 | 4002 | Yes | Yes | Yes | Yes | Yes | Yes | Yes | Yes | Yes | Yes | No  | Yes | 10 |
| Kew         | 2013 | 4003 | Yes | Yes | Yes | Yes | Yes | Yes | Yes | Yes | Yes | Yes | Yes | Yes | 11 |
| Kew         | 2014 | 4004 | Yes | Yes | Yes | Yes | Yes | Yes | Yes | Yes | Yes | Yes | No  | Yes | 10 |
| Kew         | 2016 | 8802 | Yes | No  | Yes | Yes | Yes | Yes | Yes | Yes | Yes | Yes | Yes | Yes | 10 |
| Kew         | 2015 | 8803 | Yes | Yes | Yes | Yes | Yes | Yes | Yes | Yes | Yes | Yes | Yes | Yes | 11 |
| Kew         | 2015 | 8805 | Yes | Yes | Yes | Yes | Yes | Yes | Yes | Yes | Yes | Yes | Yes | Yes | 11 |
| Kishimoto   | 2013 | 4065 | No  | No  | Yes | Yes | No  | Yes | No  | Yes | No  | Yes | Yes | No  | 6  |
| Kishimoto   | 2014 | 4067 | No  | Yes | Yes | Yes | No  | Yes | Yes | Yes | Yes | Yes | Yes | No  | 8  |
| Komossa     | 2010 | 4123 | Yes | Yes | Yes | Yes | Yes | Yes | Yes | Yes | Yes | Yes | No  | No  | 9  |
| Kuenzli     | 2010 | 4206 | No  | Yes | Yes | Yes | No  | Yes | Yes | Yes | Yes | Yes | No  | No  | 7  |
| Kumar       | 2014 | 8815 | No  | No  | No  | No  | No  | Yes | Yes | Yes | Yes | Yes | Yes | Yes | 6  |
| Kuswardhani | 2011 | 4239 | No  | No  | Yes | No  | No  | Yes | Yes | Yes | Yes | Yes | Yes | No  | 6  |
| La Mantia   | 2010 | 4260 | Yes | Yes | Yes | Yes | Yes | Yes | Yes | Yes | Yes | Yes | No  | No  | 9  |
| Lasserson   | 2011 | 4362 | Yes | Yes | Yes | Yes | Yes | Yes | Yes | Yes | Yes | Yes | No  | No  | 9  |
| Le          | 2016 | 8817 | No  | Yes | Yes | Yes | No  | Yes | Yes | Yes | Yes | Yes | Yes | No  | 8  |
| Leucht      | 2011 | 4505 | No  | No  | Yes | Yes | No  | Yes | Yes | Yes | Yes | Yes | Yes | No  | 7  |
| Leucht      | 2012 | 4508 | Yes | Yes | Yes | Yes | Yes | Yes | Yes | Yes | Yes | Yes | Yes | Yes | 11 |
| Levy        | 2010 | 4518 | No  | No  | No  | No  | No  | Yes | Yes | No  | Yes | No  | No  | No  | 3  |
| Li          | 2016 | 8822 | No  | Yes | Yes | Yes | No  | Yes | Yes | Yes | Yes | Yes | Yes | Yes | 9  |

|                |      |      |     |     |     |     |     |     |     |     |     |     |     |     |    |
|----------------|------|------|-----|-----|-----|-----|-----|-----|-----|-----|-----|-----|-----|-----|----|
| Liew           | 2014 | 4577 | No  | Yes | No  | No  | No  | No  | Yes | Yes | No  | Yes | No  | No  | 4  |
| Lipinski       | 2009 | 4615 | No  | Yes | Yes | Yes | No  | No  | Yes | Yes | No  | Yes | Yes | No  | 7  |
| Liu            | 2014 | 4629 | No  | Yes | No  | No  | No  | No  | Yes | No  | No  | Yes | Yes | No  | 4  |
| Liu            | 2014 | 8826 | No  | Yes | Yes | No  | No  | No  | Yes | Yes | Yes | Yes | Yes | No  | 7  |
| Liu            | 2014 | 8827 | No  | No  | Yes | Yes | No  | No  | Yes | Yes | Yes | Yes | Yes | No  | 7  |
| Lopez          | 2015 | 8829 | Yes | Yes | Yes | Yes | No  | No  | Yes | Yes | Yes | Yes | Yes | No  | 8  |
| Magee          | 2003 | 4812 | Yes | Yes | Yes | Yes | Yes | Yes | Yes | Yes | Yes | Yes | Yes | No  | 9  |
| Magee          | 2000 | 4815 | No  | Yes | Yes | Yes | Yes | Yes | Yes | Yes | Yes | Yes | Yes | No  | 9  |
| Makani         | 2013 | 4838 | No  | Yes | No  | No  | No  | No  | Yes | Yes | Yes | Yes | Yes | No  | 6  |
| Makrides       | 2014 | 4844 | Yes | Yes | Yes | Yes | Yes | Yes | Yes | Yes | Yes | Yes | Yes | No  | 9  |
| Mannucci       | 2008 | 4889 | No  | No  | Yes | Yes | No  | No  | Yes | Yes | No  | Yes | No  | No  | 5  |
| Medic          | 2016 | 8842 | Yes | No  | Yes | Yes | No  | No  | Yes | Yes | Yes | Yes | Yes | No  | 7  |
| Mohammed       | 2007 | 5325 | No  | No  | Yes | Yes | No  | No  | No  | Yes | Yes | Yes | No  | Yes | 6  |
| Moiniche       | 2003 | 5330 | No  | No  | Yes | No  | Yes | Yes | No  | No  | No  | Yes | No  | No  | 3  |
| Moore          | 2006 | 5371 | No  | No  | Yes | Yes | No  | No  | Yes | Yes | Yes | Yes | No  | No  | 6  |
| Nair           | 2012 | 5515 | Yes | Yes | Yes | Yes | Yes | Yes | Yes | Yes | Yes | Yes | Yes | No  | 9  |
| Nannini        | 2013 | 5533 | Yes | Yes | Yes | Yes | Yes | Yes | Yes | Yes | Yes | Yes | Yes | Yes | 10 |
| Nannini        | 2013 | 8694 | Yes | Yes | Yes | Yes | Yes | Yes | Yes | Yes | Yes | Yes | Yes | No  | 10 |
| Ngo            | 2010 | 5606 | Yes | Yes | Yes | Yes | Yes | Yes | Yes | Yes | Yes | Yes | Yes | No  | 10 |
| Ni             | 2009 | 5611 | Yes | No  | Yes | Yes | Yes | Yes | Yes | Yes | Yes | Yes | Yes | No  | 9  |
| Ni             | 2014 | 8850 | Yes | Yes | Yes | Yes | Yes | Yes | Yes | Yes | Yes | Yes | Yes | Yes | 11 |
| Ni             | 2015 | 9197 | No  | Yes | No  | No  | No  | No  | Yes | Yes | Yes | Yes | Yes | No  | 6  |
| Pizzi          | 2011 | 6161 | No  | No  | Yes | Yes | Yes | Yes | Yes | Yes | Yes | Yes | Yes | Yes | 9  |
| Poole          | 2015 | 8867 | Yes | No  | Yes | Yes | Yes | Yes | Yes | Yes | Yes | Yes | Yes | Yes | 10 |
| Powell         | 2015 | 8868 | Yes | Yes | Yes | Yes | Yes | Yes | Yes | Yes | Yes | Yes | Yes | Yes | 11 |
| Rajagopalan    | 2011 | 6347 | No  | Yes | Yes | No  | Yes | Yes | Yes | Yes | Yes | Yes | Yes | No  | 8  |
| Renner         | 2012 | 6442 | Yes | Yes | Yes | Yes | Yes | Yes | Yes | Yes | Yes | Yes | Yes | Yes | 11 |
| Rodrigo        | 1999 | 6564 | No  | Yes | Yes | No  | Yes | Yes | Yes | Yes | Yes | Yes | Yes | No  | 8  |
| Rodrigo        | 2000 | 6566 | No  | No  | Yes | Yes | No  | No  | Yes | Yes | Yes | Yes | Yes | No  | 7  |
| Rodrigo        | 2005 | 6568 | No  | No  | Yes | Yes | No  | No  | Yes | Yes | Yes | Yes | No  | No  | 6  |
| Rodrigo        | 2002 | 6576 | No  | No  | Yes | No  | Yes | Yes | Yes | Yes | Yes | Yes | No  | No  | 6  |
| Rodrigo        | 2003 | 6578 | No  | No  | Yes | Yes | Yes | Yes | Yes | Yes | Yes | Yes | No  | No  | 7  |
| Rowe           | 2000 | 6670 | Yes | Yes | Yes | Yes | No  | No  | Yes | Yes | Yes | Yes | Yes | No  | 8  |
| Rowe           | 1992 | 6672 | No  | No  | Yes | Yes | No  | No  | Yes | Yes | Yes | Yes | No  | No  | 6  |
| Rowe           | 2001 | 6676 | Yes | Yes | Yes | Yes | Yes | Yes | Yes | Yes | Yes | Yes | No  | No  | 9  |
| Rowe           | 2007 | 6677 | Yes | No  | Yes | Yes | Yes | Yes | Yes | Yes | Yes | Yes | No  | No  | 8  |
| Saab           | 2015 | 8884 | No  | No  | No  | No  | No  | No  | Yes | Yes | Yes | Yes | No  | No  | 4  |
| Saha           | 2007 | 6746 | No  | No  | No  | No  | No  | No  | Yes | Yes | Yes | Yes | No  | No  | 4  |
| Saha           | 2008 | 6747 | No  | No  | No  | No  | No  | No  | Yes | Yes | Yes | Yes | No  | No  | 4  |
| Salpeter       | 2006 | 6795 | No  | No  | Yes | Yes | No  | No  | Yes | No  | No  | Yes | Yes | Yes | 6  |
| Salpeter       | 2006 | 6797 | No  | No  | Yes | Yes | No  | No  | Yes | No  | No  | Yes | Yes | Yes | 6  |
| Sampson        | 2013 | 6806 | Yes | Yes | Yes | Yes | Yes | Yes | Yes | Yes | Yes | Yes | Yes | Yes | 11 |
| Shan           | 2013 | 7029 | No  | Yes | Yes | No  | No  | No  | Yes | Yes | No  | Yes | Yes | No  | 6  |
| Stratton       | 2013 | 7484 | No  | No  | Yes | Yes | Yes | No  | Yes | Yes | Yes | Yes | No  | No  | 6  |
| Su             | 2014 | 7504 | No  | Yes | Yes | No  | No  | No  | Yes | Yes | Yes | Yes | No  | No  | 6  |
| Susantitaphong | 2013 | 7543 | No  | No  | Yes | Yes | No  | No  | Yes | Yes | Yes | Yes | Yes | No  | 7  |



**Table S6. Distribution of evidence by patient population**

| Patient population <sup>a</sup><br>Subgroup <sup>b</sup> | Systematic reviews<br>% (n=140) <sup>c</sup> | Number of unique<br>pharmacotherapies<br>investigated<br>% (n=100) <sup>d</sup> | Description of unique pharmacotherapies and the number of reviews<br>investigating them<br>(n=140)                                                                                                                                                                                                                                                                                                                                                                                                                                                                                                                                                                                                                                                                                                                                                              |
|----------------------------------------------------------|----------------------------------------------|---------------------------------------------------------------------------------|-----------------------------------------------------------------------------------------------------------------------------------------------------------------------------------------------------------------------------------------------------------------------------------------------------------------------------------------------------------------------------------------------------------------------------------------------------------------------------------------------------------------------------------------------------------------------------------------------------------------------------------------------------------------------------------------------------------------------------------------------------------------------------------------------------------------------------------------------------------------|
| <b>Diseases of the respiratory system</b>                | <b>40% (56)</b>                              | <b>22% (22)</b>                                                                 |                                                                                                                                                                                                                                                                                                                                                                                                                                                                                                                                                                                                                                                                                                                                                                                                                                                                 |
| Other chronic obstructive pulmonary disease              | 19% (27)                                     | 10% (10)                                                                        | <ul style="list-style-type: none"> <li>• Adrenergics in combination with anticholinergics (n=2)</li> <li>• Adrenergics in combination with corticosteroids or other drugs, excl. anticholinergics (n=3)</li> <li>• Adrenergics in combination with corticosteroids or other drugs, excl. anticholinergics AND/OR Adrenergics in combination with anticholinergics AND/OR Anticholinergics (n=1)</li> <li>• Adrenergics in combination with corticosteroids or other drugs, excl. anticholinergics AND/OR Anticholinergics (n=1)</li> <li>• Adrenergics in combination with corticosteroids or other drugs, excl. anticholinergics AND/OR Glucocorticoids (n=2)</li> <li>• Anticholinergics (n=10)</li> <li>• Glucocorticoids (n=3)</li> <li>• Macrolides (n=1)</li> <li>• Mucolytics (n=1)</li> <li>• Selective beta-2-adrenoreceptor agonists (n=3)</li> </ul> |
| Status asthmaticus                                       | 14% (20)                                     | 10% (10)                                                                        | <ul style="list-style-type: none"> <li>• Adrenergics in combination with anticholinergics AND/OR Anticholinergics AND/OR Selective beta-2-adrenoreceptor agonists (n=1)</li> <li>• Corticosteroids for systemic use, plain (n=4)<sup>e</sup></li> <li>• Electrolyte solutions (n=4)</li> <li>• Electrolyte solutions AND/OR Not otherwise specified (n=1)</li> <li>• Glucocorticoids (n=3)</li> <li>• Leukotriene receptor antagonists (n=1)</li> <li>• Medical gases (n=1)</li> <li>• Nebulized magnesium sulfate (n=3)</li> <li>• Selective beta-2-adrenoreceptor agonists (n=2)</li> <li>• Xanthines (n=1)</li> </ul>                                                                                                                                                                                                                                        |
| Asthma (chronic)                                         | 10% (14)                                     | 7% (7)                                                                          | <ul style="list-style-type: none"> <li>• Adrenergics in combination with anticholinergics AND/OR Anticholinergics alone (n=1)</li> <li>• Adrenergics in combination with corticosteroids or other drugs, excl. anticholinergics (n=6)</li> <li>• Anticholinergics (n=2)</li> <li>• Interleukin inhibitors (1)</li> <li>• Leukotriene receptor antagonists (n=2)</li> <li>• Macrolides (n=1)</li> <li>• Selective beta-2-adrenoreceptor agonists (n=1)</li> </ul>                                                                                                                                                                                                                                                                                                                                                                                                |
| Influenza, virus not identified                          | 1% (2)                                       | 1% (1)                                                                          | <ul style="list-style-type: none"> <li>• Neuraminidase inhibitors (n=2)</li> </ul>                                                                                                                                                                                                                                                                                                                                                                                                                                                                                                                                                                                                                                                                                                                                                                              |
| Bronchiectasis                                           | <1% (1)                                      | 1% (1)                                                                          | <ul style="list-style-type: none"> <li>• Macrolides (n=1)</li> </ul>                                                                                                                                                                                                                                                                                                                                                                                                                                                                                                                                                                                                                                                                                                                                                                                            |
| Other interstitial pulmonary diseases                    | <1% (1)                                      | 1% (1)                                                                          | <ul style="list-style-type: none"> <li>• Colchicine (n=1)</li> </ul>                                                                                                                                                                                                                                                                                                                                                                                                                                                                                                                                                                                                                                                                                                                                                                                            |

| <b>Diseases of the circulatory system</b>            | <b>38% (53)</b> | <b>31% (31)</b> |                                                                                                                                                                                                                                                                                                                                                                                                                                                                                                                                                                                                                                                                                                                                                                                                                                                                                                                                                                                                                                                                                                               |
|------------------------------------------------------|-----------------|-----------------|---------------------------------------------------------------------------------------------------------------------------------------------------------------------------------------------------------------------------------------------------------------------------------------------------------------------------------------------------------------------------------------------------------------------------------------------------------------------------------------------------------------------------------------------------------------------------------------------------------------------------------------------------------------------------------------------------------------------------------------------------------------------------------------------------------------------------------------------------------------------------------------------------------------------------------------------------------------------------------------------------------------------------------------------------------------------------------------------------------------|
| Heart failure                                        | 25% (35)        | 18% (18)        | <ul style="list-style-type: none"> <li>• ACE inhibitors, plain (n=3)</li> <li>• ACE inhibitors, plain AND/OR Angiotensin II antagonists, plain (n=6)</li> <li>• ACE inhibitors, plain AND/OR Angiotensin II antagonists, plain AND/OR POTASSIUM-SPARING AGENTS (n=1)</li> <li>• Aldosterone antagonists (n=4)</li> <li>• Alpha and beta blocking agents (n=1)</li> <li>• Alpha and beta blocking agents AND/OR Beta blocking agents, non-selective (n=1)</li> <li>• Alpha and beta blocking agents AND/OR Beta blocking agents, selective (n=1)</li> <li>• Angiotensin II antagonists, plain (n=4)</li> <li>• Angiotensin II antagonists, other combinations (n=1)</li> <li>• Digitalis glycosides (n=3)</li> <li>• HMG CoA reductase inhibitors (n=4)</li> <li>• Iron, parenteral preparations (n=1)</li> <li>• Iron, parenteral preparations AND/OR Other antianemic preparations (n=1)</li> <li>• Other antianemic preparations (n=1)</li> <li>• Other cardiac preparations (n=1)</li> <li>• Renin-inhibitors (n=1)</li> <li>• Sulfonamides, plain (n=1)</li> <li>• Vitamin K antagonists (n=1)</li> </ul> |
| Chronic ischaemic heart disease                      | 6% (9)          | 9% (9)          | <ul style="list-style-type: none"> <li>• ACE inhibitors, plain (n=2)</li> <li>• Aldosterone antagonists (n=1)</li> <li>• Colony stimulating factors (n=1)</li> <li>• Fibrates (n=1)</li> <li>• Fibrates AND/OR Nicotinic acid and derivatives (n=1)</li> <li>• HMG CoA reductase inhibitors (n=1)</li> <li>• Lipid modifying agents, plain (n=1)<sup>e</sup></li> <li>• Nicotinic acid and derivatives (n=1)</li> <li>• Other cardiac preparations (n=1)</li> </ul>                                                                                                                                                                                                                                                                                                                                                                                                                                                                                                                                                                                                                                           |
| Other pulmonary heart diseases                       | 4% (5)          | 4% (4)          | <ul style="list-style-type: none"> <li>• Antihypertensives AND/OR antithrombotic agents AND/OR urologicals (n=2)<sup>e</sup></li> <li>• Antihypertensives for pulmonary arterial hypertension (n=1)</li> <li>• Drugs used in erectile dysfunction (n=1)</li> <li>• Platelet aggregation inhibitors excl. heparin (n=1)</li> </ul>                                                                                                                                                                                                                                                                                                                                                                                                                                                                                                                                                                                                                                                                                                                                                                             |
| Acute myocardial infarction                          | 3% (4)          | 2% (2)          | <ul style="list-style-type: none"> <li>• Bone marrow stem cells (n=3)</li> <li>• Nitroferricyanide derivatives (n=1)</li> </ul>                                                                                                                                                                                                                                                                                                                                                                                                                                                                                                                                                                                                                                                                                                                                                                                                                                                                                                                                                                               |
| Chronic ischaemic heart disease AND/OR Heart failure | 2% (3)          | 3% (3)          | <ul style="list-style-type: none"> <li>• Aldosterone antagonists (n=2)</li> <li>• Bone marrow stem cells (n=2)</li> <li>• Other antianemic preparations (n=1)</li> </ul>                                                                                                                                                                                                                                                                                                                                                                                                                                                                                                                                                                                                                                                                                                                                                                                                                                                                                                                                      |
| Atrial fibrillation and flutter                      | 2% (3)          | 3% (3)          | <ul style="list-style-type: none"> <li>• Antiarrhythmics, class III (n=1)</li> <li>• Antiarrhythmics, class Ia AND/OR Antiarrhythmics, class Ic AND/OR Antiarrhythmics, class III AND/OR Other antiarrhythmics, class I and III (n=1)</li> <li>• Vitamin K antagonists (n=1)</li> </ul>                                                                                                                                                                                                                                                                                                                                                                                                                                                                                                                                                                                                                                                                                                                                                                                                                       |

|                                                                                                     |               |                 |                                                                                                                                                                                                                                                                                                                                                                                                                                                                                                                                                                                                                                                                                                                                               |
|-----------------------------------------------------------------------------------------------------|---------------|-----------------|-----------------------------------------------------------------------------------------------------------------------------------------------------------------------------------------------------------------------------------------------------------------------------------------------------------------------------------------------------------------------------------------------------------------------------------------------------------------------------------------------------------------------------------------------------------------------------------------------------------------------------------------------------------------------------------------------------------------------------------------------|
| Patients at low risk of cardiovascular disease <sup>f</sup>                                         | <1% (1)       | 1% (1)          | <ul style="list-style-type: none"> <li>Thiazolidinediones (n=1)</li> </ul>                                                                                                                                                                                                                                                                                                                                                                                                                                                                                                                                                                                                                                                                    |
| Essential (primary) hypertension                                                                    | <1% (1)       | 1% (1)          | <ul style="list-style-type: none"> <li>Angiotensin II antagonists, plain (n=1)</li> </ul>                                                                                                                                                                                                                                                                                                                                                                                                                                                                                                                                                                                                                                                     |
| Acute myocardial infarction AND/OR Heart failure                                                    | <1% (1)       | 1% (1)          | <ul style="list-style-type: none"> <li>Alpha and beta blocking agents (n=1)</li> </ul>                                                                                                                                                                                                                                                                                                                                                                                                                                                                                                                                                                                                                                                        |
| Other acute ischaemic heart diseases                                                                | <1% (1)       | 1% (1)          | <ul style="list-style-type: none"> <li>HMG CoA reductase inhibitors (n=1)</li> </ul>                                                                                                                                                                                                                                                                                                                                                                                                                                                                                                                                                                                                                                                          |
| <b>Factors influencing health status and contact with health services</b>                           | <b>6% (8)</b> | <b>11% (11)</b> |                                                                                                                                                                                                                                                                                                                                                                                                                                                                                                                                                                                                                                                                                                                                               |
| Need for immunization against other single viral diseases                                           | 1% (2)        | 2% (2)          | <ul style="list-style-type: none"> <li>Influenza vaccines (n=1)</li> <li>Neuraminidase inhibitors (n=1)</li> </ul>                                                                                                                                                                                                                                                                                                                                                                                                                                                                                                                                                                                                                            |
| Patients receiving special screening examination for neoplasms                                      | 3% (4)        | 4% (4)          | <ul style="list-style-type: none"> <li>Antibiotics (n=1)</li> <li>Penicillins with extended spectrum (n=1)</li> <li>Quinoline derivatives (n=1)</li> <li>Sulfonamides (n=1)</li> </ul>                                                                                                                                                                                                                                                                                                                                                                                                                                                                                                                                                        |
| Patients receiving other medical care                                                               | 1% (2)        | 2% (2)          | <ul style="list-style-type: none"> <li>Colony stimulating factors (n=1)</li> <li>Other general anesthetics (n=1)</li> </ul>                                                                                                                                                                                                                                                                                                                                                                                                                                                                                                                                                                                                                   |
| Patients receiving other surgical follow-up care                                                    | 1% (2)        | 2% (2)          | <ul style="list-style-type: none"> <li>Acetic acid derivatives and related substances AND/OR Propionic acid derivatives (n=1)</li> <li>Opioids(n=1)<sup>e</sup></li> </ul>                                                                                                                                                                                                                                                                                                                                                                                                                                                                                                                                                                    |
| Patients receiving care involving dialysis (long term haemodialysis with a central venous catheter) | <1% (1)       | 1% (1)          | <ul style="list-style-type: none"> <li>Other antibiotics for topical use (n=1)</li> </ul>                                                                                                                                                                                                                                                                                                                                                                                                                                                                                                                                                                                                                                                     |
| <b>Diseases of the digestive system</b>                                                             | <b>6% (8)</b> | <b>3% (3)</b>   |                                                                                                                                                                                                                                                                                                                                                                                                                                                                                                                                                                                                                                                                                                                                               |
| Ulcerative colitis                                                                                  | <1% (1)       | 1% (1)          | <ul style="list-style-type: none"> <li>Tumor necrosis factor alpha (TNF-<math>\alpha</math>) inhibitors (n=1)</li> </ul>                                                                                                                                                                                                                                                                                                                                                                                                                                                                                                                                                                                                                      |
| Crohn disease [regional enteritis]                                                                  | 1% (2)        | 1% (1)          | <ul style="list-style-type: none"> <li>Tumor necrosis factor alpha (TNF-<math>\alpha</math>) inhibitors (n=2)</li> </ul>                                                                                                                                                                                                                                                                                                                                                                                                                                                                                                                                                                                                                      |
| Hepatic failure, not elsewhere classified                                                           | <1% (1)       | 1% (1)          | <ul style="list-style-type: none"> <li>Probiotics (n=1)</li> </ul>                                                                                                                                                                                                                                                                                                                                                                                                                                                                                                                                                                                                                                                                            |
| Alcoholic liver disease                                                                             | <1% (1)       | 1% (1)          | <ul style="list-style-type: none"> <li>Colchicine (n=1)</li> </ul>                                                                                                                                                                                                                                                                                                                                                                                                                                                                                                                                                                                                                                                                            |
| Crohn disease [regional enteritis] AND/OR Ulcerative colitis                                        | <1% (1)       | 1% (1)          | <ul style="list-style-type: none"> <li>Tumor necrosis factor alpha (TNF-<math>\alpha</math>) inhibitors (n=1)</li> </ul>                                                                                                                                                                                                                                                                                                                                                                                                                                                                                                                                                                                                                      |
| <b>Mental and behavioural disorders</b>                                                             | <b>5% (7)</b> | <b>19% (19)</b> |                                                                                                                                                                                                                                                                                                                                                                                                                                                                                                                                                                                                                                                                                                                                               |
| Schizophrenia                                                                                       | 19% (26)      | 18% (18)        | <ul style="list-style-type: none"> <li>Benzamides (n=1)</li> <li>Benzamides AND/OR Diazepines, oxazepines, thiazepines and oxepines AND/OR Indole derivatives AND/OR Other antipsychotics (n=1)</li> <li>Butyrophenone derivatives (n=1)</li> <li>Butyrophenone derivatives AND/OR Diazepines, oxazepines, thiazepines and oxepines AND/OR Other antipsychotics AND/OR Phenothiazines with aliphatic side-chain AND/OR Phenothiazines with piperazine structure (n=1)</li> <li>Butyrophenone derivatives AND/OR Diazepines, oxazepines, thiazepines and oxepines AND/OR Other antipsychotics AND/OR Phenothiazines with aliphatic side-chain AND/OR Phenothiazines with piperazine structure AND/OR Thioxanthene derivatives (n=1)</li> </ul> |

|                                                                           |               |               |                                                                                                                                                                                                                                                                                                                                                                                                                                                                                                                                                                                                                                                                                                                                                                                                                                                                                                                                                                                                                                                                                                                                                                                                                                                                                                                                                                                                                               |
|---------------------------------------------------------------------------|---------------|---------------|-------------------------------------------------------------------------------------------------------------------------------------------------------------------------------------------------------------------------------------------------------------------------------------------------------------------------------------------------------------------------------------------------------------------------------------------------------------------------------------------------------------------------------------------------------------------------------------------------------------------------------------------------------------------------------------------------------------------------------------------------------------------------------------------------------------------------------------------------------------------------------------------------------------------------------------------------------------------------------------------------------------------------------------------------------------------------------------------------------------------------------------------------------------------------------------------------------------------------------------------------------------------------------------------------------------------------------------------------------------------------------------------------------------------------------|
|                                                                           |               |               | <ul style="list-style-type: none"> <li>• Butyrophenone derivatives AND/OR Phenothiazines with aliphatic side-chain AND/OR Phenothiazines with piperazine structure (n=2)</li> <li>• Diazepines, oxazepines, thiazepines and oxepines (n=3)</li> <li>• Diazepines, oxazepines, thiazepines and oxepines AND/OR Other antipsychotics (n=2)</li> <li>• Diazepines, oxazepines, thiazepines and oxepines AND/OR Other antipsychotics AND/OR Phenothiazines with aliphatic side-chain (n=1)</li> <li>• Diazepines, oxazepines, thiazepines and oxepines AND/OR Other antipsychotics AND/OR Phenothiazines with aliphatic side-chain AND/OR Phenothiazines with piperazine structure AND/OR Thioxanthene derivatives (n=2)</li> <li>• Diazepines, oxazepines, thiazepines and oxepines AND/OR Other antipsychotics AND/OR Phenothiazines with aliphatic side-chain AND/OR Thioxanthene derivatives (n=1)</li> <li>• Diazepines, oxazepines, thiazepines and oxepines AND/OR Other antipsychotics AND/OR Phenothiazines with piperazine structure AND/OR Thioxanthene derivatives (n=1)</li> <li>• Indole derivatives (n=1)</li> <li>• Other antipsychotics (n=2)</li> <li>• Phenothiazines with aliphatic side-chain (n=1)</li> <li>• Phenothiazines with piperazine structure (n=3)</li> <li>• Phenothiazines with piperazine structure AND/OR Thioxanthene derivatives (n=1)</li> <li>• Thioxanthene derivatives (n=1)</li> </ul> |
| Bipolar affective disorder                                                | <1% (1)       | 1% (1)        | <ul style="list-style-type: none"> <li>• Carboxamide derivatives (n=1)</li> </ul>                                                                                                                                                                                                                                                                                                                                                                                                                                                                                                                                                                                                                                                                                                                                                                                                                                                                                                                                                                                                                                                                                                                                                                                                                                                                                                                                             |
| <b>Diseases of the genitourinary system</b>                               | <b>4% (5)</b> | <b>5% (5)</b> |                                                                                                                                                                                                                                                                                                                                                                                                                                                                                                                                                                                                                                                                                                                                                                                                                                                                                                                                                                                                                                                                                                                                                                                                                                                                                                                                                                                                                               |
| Chronic kidney disease                                                    | 2% (3)        | 3% (3)        | <ul style="list-style-type: none"> <li>• ACE inhibitors, combinations AND/OR Angiotensin II antagonists, combinations AND/OR Diuretics and potassium-sparing agents in combination (n=1)<sup>e</sup></li> <li>• Beta-blocking agents (n=1)<sup>e</sup></li> <li>• Other antianemic preparations (n=1)</li> </ul>                                                                                                                                                                                                                                                                                                                                                                                                                                                                                                                                                                                                                                                                                                                                                                                                                                                                                                                                                                                                                                                                                                              |
| Disorders resulting from impaired renal tubular function                  | <1% (1)       | 1% (1)        | <ul style="list-style-type: none"> <li>• Other anti-parathyroid agents (n=1)</li> </ul>                                                                                                                                                                                                                                                                                                                                                                                                                                                                                                                                                                                                                                                                                                                                                                                                                                                                                                                                                                                                                                                                                                                                                                                                                                                                                                                                       |
| Calculus of kidney and ureter                                             | <1% (1)       | 1% (1)        | <ul style="list-style-type: none"> <li>• Alpha-adrenoreceptor antagonists (n=1)</li> </ul>                                                                                                                                                                                                                                                                                                                                                                                                                                                                                                                                                                                                                                                                                                                                                                                                                                                                                                                                                                                                                                                                                                                                                                                                                                                                                                                                    |
| <b>Pregnancy, childbirth and the puerperium</b>                           | <b>3% (4)</b> | <b>3% (3)</b> |                                                                                                                                                                                                                                                                                                                                                                                                                                                                                                                                                                                                                                                                                                                                                                                                                                                                                                                                                                                                                                                                                                                                                                                                                                                                                                                                                                                                                               |
| Gestational hypertension with or without significant proteinuria          | <1% (1)       | 1% (1)        | <ul style="list-style-type: none"> <li>• Beta-blocking agents (n=1)<sup>e</sup></li> </ul>                                                                                                                                                                                                                                                                                                                                                                                                                                                                                                                                                                                                                                                                                                                                                                                                                                                                                                                                                                                                                                                                                                                                                                                                                                                                                                                                    |
| Excessive vomiting in pregnancy                                           | <1% (1)       | 1% (1)        | <ul style="list-style-type: none"> <li>• Glucocorticoids (n=1)</li> </ul>                                                                                                                                                                                                                                                                                                                                                                                                                                                                                                                                                                                                                                                                                                                                                                                                                                                                                                                                                                                                                                                                                                                                                                                                                                                                                                                                                     |
| Gestational hypertension without significant proteinuria                  | <1% (1)       | 1% (1)        | <ul style="list-style-type: none"> <li>• Beta-blocking agents (n=1)<sup>e</sup></li> </ul>                                                                                                                                                                                                                                                                                                                                                                                                                                                                                                                                                                                                                                                                                                                                                                                                                                                                                                                                                                                                                                                                                                                                                                                                                                                                                                                                    |
| Normal or high risk pregnancy <sup>f</sup>                                | <1% (1)       | 1% (1)        | <ul style="list-style-type: none"> <li>• Magnesium (n=1)</li> </ul>                                                                                                                                                                                                                                                                                                                                                                                                                                                                                                                                                                                                                                                                                                                                                                                                                                                                                                                                                                                                                                                                                                                                                                                                                                                                                                                                                           |
| <b>Endocrine, nutritional, and metabolic diseases</b>                     | <b>4% (5)</b> | <b>5% (5)</b> |                                                                                                                                                                                                                                                                                                                                                                                                                                                                                                                                                                                                                                                                                                                                                                                                                                                                                                                                                                                                                                                                                                                                                                                                                                                                                                                                                                                                                               |
| Diabetes mellitus                                                         | <1% (1)       | 1% (1)        | <ul style="list-style-type: none"> <li>• ACE inhibitors, plain (n=1)</li> </ul>                                                                                                                                                                                                                                                                                                                                                                                                                                                                                                                                                                                                                                                                                                                                                                                                                                                                                                                                                                                                                                                                                                                                                                                                                                                                                                                                               |
| Non-insulin-dependent diabetes mellitus                                   | <1% (1)       | 1% (1)        | <ul style="list-style-type: none"> <li>• Dipeptidyl peptidase 4 (DPP-4) inhibitor (n=1)</li> </ul>                                                                                                                                                                                                                                                                                                                                                                                                                                                                                                                                                                                                                                                                                                                                                                                                                                                                                                                                                                                                                                                                                                                                                                                                                                                                                                                            |
| Malnourished patients being discharged from the hospital to the community | <1% (1)       | 1% (1)        | <ul style="list-style-type: none"> <li>• Other nutrients (n=1)</li> </ul>                                                                                                                                                                                                                                                                                                                                                                                                                                                                                                                                                                                                                                                                                                                                                                                                                                                                                                                                                                                                                                                                                                                                                                                                                                                                                                                                                     |



|                                                                                                                                                                                                                                                                                                                                                                                                                                                                                                                                                                                                                                                                                                                                                                                                                                                                                                                                                                                                                                                                                                                                                                                                   |                   |               |                                                                                                                                                                                     |
|---------------------------------------------------------------------------------------------------------------------------------------------------------------------------------------------------------------------------------------------------------------------------------------------------------------------------------------------------------------------------------------------------------------------------------------------------------------------------------------------------------------------------------------------------------------------------------------------------------------------------------------------------------------------------------------------------------------------------------------------------------------------------------------------------------------------------------------------------------------------------------------------------------------------------------------------------------------------------------------------------------------------------------------------------------------------------------------------------------------------------------------------------------------------------------------------------|-------------------|---------------|-------------------------------------------------------------------------------------------------------------------------------------------------------------------------------------|
| Older (65+) patients being discharged from the hospital to the community that are malnourished or at risk of malnourishment                                                                                                                                                                                                                                                                                                                                                                                                                                                                                                                                                                                                                                                                                                                                                                                                                                                                                                                                                                                                                                                                       | <1% (1)           | 1% (1)        | <ul style="list-style-type: none"> <li>General nutrients (n=1)</li> </ul>                                                                                                           |
| Patients in hospital or community settings that are malnourished or at risk for disease-related malnutrition                                                                                                                                                                                                                                                                                                                                                                                                                                                                                                                                                                                                                                                                                                                                                                                                                                                                                                                                                                                                                                                                                      | <1% (1)           | 1% (1)        | <ul style="list-style-type: none"> <li>Protein supplementation (n=1)</li> </ul>                                                                                                     |
| <b>Mixed patient population<sup>e</sup></b>                                                                                                                                                                                                                                                                                                                                                                                                                                                                                                                                                                                                                                                                                                                                                                                                                                                                                                                                                                                                                                                                                                                                                       | <b>2% (3)</b>     | <b>3% (3)</b> |                                                                                                                                                                                     |
| Heart failure or Type 1 diabetes mellitus with renal complications                                                                                                                                                                                                                                                                                                                                                                                                                                                                                                                                                                                                                                                                                                                                                                                                                                                                                                                                                                                                                                                                                                                                | <1% (1)           | 1% (1)        | <ul style="list-style-type: none"> <li>ACE inhibitors, plain AND/OR Angiotensin II antagonists, plain AND/OR Renin-inhibitors (n=1)</li> </ul>                                      |
| Patients indicated for treatment with non-steroidal anti-inflammatory drugs                                                                                                                                                                                                                                                                                                                                                                                                                                                                                                                                                                                                                                                                                                                                                                                                                                                                                                                                                                                                                                                                                                                       | <1% (1)           | 1% (1)        | <ul style="list-style-type: none"> <li>Cox-2 inhibitors (n=1)</li> </ul>                                                                                                            |
| Alcoholic liver diseases (alcoholic cirrhosis of the liver) or Other interstitial pulmonary diseases (idiopathic pulmonary fibrosis)                                                                                                                                                                                                                                                                                                                                                                                                                                                                                                                                                                                                                                                                                                                                                                                                                                                                                                                                                                                                                                                              | <1% (1)           | 1% (1)        | <ul style="list-style-type: none"> <li>Colchicine (n=1)</li> </ul>                                                                                                                  |
| <b>Multi-morbidity<sup>h</sup></b>                                                                                                                                                                                                                                                                                                                                                                                                                                                                                                                                                                                                                                                                                                                                                                                                                                                                                                                                                                                                                                                                                                                                                                | <b>1% (2)</b>     | <b>2% (2)</b> |                                                                                                                                                                                     |
| Chronic ischaemic heart disease and Recurrent depressive disorder                                                                                                                                                                                                                                                                                                                                                                                                                                                                                                                                                                                                                                                                                                                                                                                                                                                                                                                                                                                                                                                                                                                                 | 1% (2)            | 2% (2)        | <ul style="list-style-type: none"> <li>Selective serotonin reuptake inhibitors (n=1)</li> <li>Other antidepressants AND/OR Selective serotonin reuptake inhibitors (n=1)</li> </ul> |
| <b>Diseases of the nervous system</b>                                                                                                                                                                                                                                                                                                                                                                                                                                                                                                                                                                                                                                                                                                                                                                                                                                                                                                                                                                                                                                                                                                                                                             | <b>1% (2)</b>     | <b>2% (2)</b> |                                                                                                                                                                                     |
| Multiple sclerosis                                                                                                                                                                                                                                                                                                                                                                                                                                                                                                                                                                                                                                                                                                                                                                                                                                                                                                                                                                                                                                                                                                                                                                                | 1% (2)            | 1% (2)        | <ul style="list-style-type: none"> <li>Interferons (n=1)</li> <li>Other immunostimulants (n=1)</li> </ul>                                                                           |
| <b>Diseases of the musculoskeletal system and connective tissue</b>                                                                                                                                                                                                                                                                                                                                                                                                                                                                                                                                                                                                                                                                                                                                                                                                                                                                                                                                                                                                                                                                                                                               | <b>&lt;1% (1)</b> | <b>1% (1)</b> |                                                                                                                                                                                     |
| Systemic lupus erythematosus                                                                                                                                                                                                                                                                                                                                                                                                                                                                                                                                                                                                                                                                                                                                                                                                                                                                                                                                                                                                                                                                                                                                                                      | <1% (1)           | 1% (1)        | <ul style="list-style-type: none"> <li>Selective immunosuppressants (n=1)</li> </ul>                                                                                                |
| <b>Infectious and parasitic diseases</b>                                                                                                                                                                                                                                                                                                                                                                                                                                                                                                                                                                                                                                                                                                                                                                                                                                                                                                                                                                                                                                                                                                                                                          | <b>&lt;1% (1)</b> | <b>1% (1)</b> |                                                                                                                                                                                     |
| Human immunodeficiency virus [HIV] disease <sup>e</sup>                                                                                                                                                                                                                                                                                                                                                                                                                                                                                                                                                                                                                                                                                                                                                                                                                                                                                                                                                                                                                                                                                                                                           | <1% (1)           | 1% (1)        | <ul style="list-style-type: none"> <li>Combinations of sulfonamides and trimethoprim, incl. derivatives (n=1)</li> </ul>                                                            |
| <p><sup>a</sup>Patient populations were classified using the World Health Organisations 10th revision of the International Statistical Classification of Diseases and Related Health Problems (ICD 10). <sup>b</sup>These specific classifications represent the summary and 3-character coding level in the ICD 10. <sup>c</sup>Denominator for this column is the number of systematic reviews. <sup>d</sup>One product class defined as a chemical subgroup in the ATC WHO. Only includes products in the intervention group. The numbers in the column do not add up to 100 as some of the products were used in multiple patient populations. <sup>e</sup>Mixed populations were those that were coded by two or more different ICD summary codes. <sup>f</sup>Patient population(s) not captured in codes available in the ICD-10. <sup>g</sup>Pharmacological sub-group classification not possible because review reported limited detail of the medication. Therefore, this code represents the broader classification based on therapeutic or chemical characteristics. <sup>h</sup>Multi-morbid populations were those that were coded by two or more different ICD summary codes.</p> |                   |               |                                                                                                                                                                                     |

**Table S7. GRADED estimates showing reductions in admissions.**

| Author, Year, Estimate ID                               | Population description                                                                                                                                                                                         | Intervention (Event rate) <sup>a</sup>                                                                  | Comparison (Event rate) <sup>a</sup>                                           | Patients (RCTs) | Patient age <sup>b</sup> | Outcome (follow-up) <sup>c</sup>                    | Effect (95% CI) <sup>d,e</sup><br>NNT (95% CI) <sup>e,f</sup><br>I <sup>2</sup> % | Quality of evidence (GRADE) | Notes            |
|---------------------------------------------------------|----------------------------------------------------------------------------------------------------------------------------------------------------------------------------------------------------------------|---------------------------------------------------------------------------------------------------------|--------------------------------------------------------------------------------|-----------------|--------------------------|-----------------------------------------------------|-----------------------------------------------------------------------------------|-----------------------------|------------------|
| <b>Disease of the circulatory system</b>                |                                                                                                                                                                                                                |                                                                                                         |                                                                                |                 |                          |                                                     |                                                                                   |                             |                  |
| <b>Acute myocardial infarction</b>                      |                                                                                                                                                                                                                |                                                                                                         |                                                                                |                 |                          |                                                     |                                                                                   |                             |                  |
| Su, 2014, 7504                                          | Undergoing percutaneous coronary intervention                                                                                                                                                                  | Nitroprusside (10 per 100)                                                                              | Placebo (22 per 100)                                                           | 190 (2)         | 58 ±6                    | Readmission for cardiovascular issues (Unclear)     | RR: 0.44 (0.21 to 0.91)<br>NNT: 8 (6 to 51)<br>0%                                 | Low                         | Summary estimate |
| <b>Chronic ischaemic heart disease</b>                  |                                                                                                                                                                                                                |                                                                                                         |                                                                                |                 |                          |                                                     |                                                                                   |                             |                  |
| Danchin, 2006, 1752a                                    | Stable coronary heart disease and absence of heart failure or left ventricular systolic dysfunction                                                                                                            | Angiotensin-Converting Enzyme Inhibitor [Ramipril, Perindopril, Trandolapril, or Enalapril] (2 per 100) | Placebo (3 per 100)                                                            | 31750 (5)       | 62 ±3                    | Admission for heart failure (50 ±15 months)         | OR: 0.76 (0.66 to 0.88)<br>NNT: 146 (103 to 294)<br>I <sup>2</sup> : Unclear      | Moderate                    | Summary estimate |
| Saha, 2007, 6746b                                       | Patients with a prior cardiovascular event or at high risk for cardiovascular events with preserved left ventricular function                                                                                  | Tissue angiotensin converting enzyme Inhibitors [Ramipril, Perindopril, or Trandolapril] (2.5 per 100)  | Placebo (3.2 per 100)                                                          | 29805 (4)       | 63 ±3                    | Admission for heart failure (12 months)             | RR: 0.78 (0.67 to 0.9)<br>NNT: 140 (93 to 308)<br>I <sup>2</sup> : Unclear        | High                        | Summary estimate |
| Afilalo, 2007, 100c                                     | Stable coronary heart disease                                                                                                                                                                                  | Intensive statin therapy [Atorvastatin or Simvastatin] (2 per 100)                                      | Moderate statin therapy [Pravastatin, Atorvastatin or Simvastatin] (3 per 100) | 27547 (4)       | 61 ±2                    | Admission for heart failure (41 ±20 months)         | OR: 0.72 (0.62 to 0.83)<br>NNT: 115 (84 to 189)<br>I <sup>2</sup> : 4%            | Moderate                    | Summary estimate |
| <b>Chronic ischaemic heart disease or Heart failure</b> |                                                                                                                                                                                                                |                                                                                                         |                                                                                |                 |                          |                                                     |                                                                                   |                             |                  |
| Le, 2016, 8817a                                         | Heart failure with left ventricular dysfunction (New York Heart Association 1 to 4) and/or post-acute myocardial infarction with Killip scores between I and IV and indicated at least one assessment criteria | Aldosterone Antagonists [Canrenone, Spironolactone, Eplerenone, or Potassium Canrenoate] (20 per 100)   | Placebo (21 per 100)                                                           | 15786 (13)      | 63 ±6                    | Hospital admission (15 ±10 months)                  | RR: 0.93 (0.88 to 0.98)<br>NNT: 67 (39 to 233)<br>I <sup>2</sup> : 35%            | Moderate                    | Summary estimate |
| Le, 2016, 8817d                                         | Heart failure with left ventricular dysfunction (New York Heart Association 1 to 4) and/or post-acute myocardial infarction with Killip scores between I and IV and indicated at least one assessment criteria | Aldosterone Antagonists [Canrenone, Spironolactone, Eplerenone, or Potassium Canrenoate] (12 per 100)   | Control/placebo (15 per 100)                                                   | 16730 (12)      | 64 ±4                    | Admission for cardiovascular issues (18 ±12 months) | RR: 0.82 (0.72 to 0.92)<br>NNT: 37 (24 to 83)<br>I <sup>2</sup> : 51%             | Low                         | Summary estimate |
| Chen, 2015, 8742a                                       | Heart failure and/or previous myocardial infarction with preserved ejection fraction (>= 40%)                                                                                                                  | Aldosterone antagonists [Eplerenone or Spironolactone] (4.5 per 100)                                    | Placebo or standard care (5.4 per 100)                                         | 4551 (3)        | Unclear                  | Admission for heart failure (16 ±16 months)         | RR: 0.83 (0.7 to 0.98)<br>NNT: 108 (61 to 920)<br>I <sup>2</sup> : 0%             | Low                         | Summary estimate |

|                      |                                                                                     |                                                                                                                                                                                                  |                                                                                        |           |         |                                                     |                                                                                        |          |                                                                                                            |
|----------------------|-------------------------------------------------------------------------------------|--------------------------------------------------------------------------------------------------------------------------------------------------------------------------------------------------|----------------------------------------------------------------------------------------|-----------|---------|-----------------------------------------------------|----------------------------------------------------------------------------------------|----------|------------------------------------------------------------------------------------------------------------|
| Fisher, 2014, 8769b  | Heart failure and/or previous myocardial infarction                                 | Bone marrow stem cells (4 per 100)                                                                                                                                                               | No cells (14 per 100)                                                                  | 198 (2)   | 58 ±4   | Readmission for heart failure (36 ±34 months)       | RR: 0.26 (0.07 to 0.94)<br>NNT: 10 (8 to 122)<br>I <sup>2</sup> : 0%                   | Low      | Summary estimate                                                                                           |
| <b>Heart failure</b> |                                                                                     |                                                                                                                                                                                                  |                                                                                        |           |         |                                                     |                                                                                        |          |                                                                                                            |
| Xie, 2016, 8916c     | Heart failure with reduced ejection fraction or left ventricular dysfunction        | Aldosterone antagonists [Canrenone, Eplerenone, or Spironolactone] (11 per 100)                                                                                                                  | Placebo (15 per 100)                                                                   | 11477 (4) | 65 ±3   | Admission for heart failure (18 ±5 months)          | OR: 0.67 (0.53 to 0.86)<br>NNT: 22 (15 to 54)<br>I <sup>2</sup> : 74%                  | Moderate | Summary estimate                                                                                           |
| Le, 2016, 8817e      | Heart failure with left ventricular dysfunction (New York Heart Association 1 to 4) | Aldosterone antagonists [Canrenone, Spironolactone, or Eplerenone] (11 per 100)                                                                                                                  | Control/placebo (14 per 100)                                                           | 9040 (9)  | 66 ±3   | Admission for cardiovascular issues (20 ±13 months) | RR: 0.79 (0.68 to 0.91)<br>NNT: 33 (22 to 78)<br>I <sup>2</sup> : 49%                  | Low      | Sub-group by disease: Heart failure                                                                        |
| Xie, 2016, 8916a     | Heart failure with reduced ejection fraction or left ventricular dysfunction        | Angiotensin converting enzyme inhibitor [Ramipril, Captopril, Enalapril, or Trandolapril] (13 per 100)                                                                                           | Placebo (18 per 100)                                                                   | 12763 (5) | 62 ±4   | Admission for heart failure (32 ±12 months)         | OR: 0.67 (0.61 to 0.74)<br>NNT: 19 (16 to 25)<br>I <sup>2</sup> : 0%                   | Moderate | Summary estimate                                                                                           |
| Xie, 2016, 8916b     | Heart failure with reduced ejection fraction or left ventricular dysfunction        | Angiotensin II receptor blocker [Candesartan or Valsartan] (18 per 100)                                                                                                                          | Placebo (23 per 100)                                                                   | 9878 (4)  | 65 ±2   | Admission for heart failure (26 ±15 months)         | OR: 0.72 (0.64 to 0.82)<br>NNT: 19 (14 to 30)<br>I <sup>2</sup> : 30%                  | Moderate | Summary estimate                                                                                           |
| Heran, 2012, 3275d   | Heart failure with reduced left ventricular ejection fraction (<=40%)               | Angiotensin II receptor blocker [Candesartan] (13 per 100)                                                                                                                                       | Placebo (19 per 100)                                                                   | 2590 (3)  | 66 ±2   | Admission for heart failure (14 ±17 months)         | RR: 0.71 (0.61 to 0.82)<br>NNT: 18 (14 to 30)<br>I <sup>2</sup> : 0%                   | Low      | Sub-group by disease severity: Patients with left ventricular ejection fractions less than or equal to 40% |
| Heran, 2012, 3275f   | Heart failure, any ejection fraction                                                | Angiotensin II receptor blocker and angiotensin converting enzyme inhibitor [ARB (Irbesartan or Candesartan) and ACE inhibitor (Enalapril or other)] (10 per 100)                                | Angiotensin converting enzyme inhibitors [Enalapril or other] (12 per 100)             | 8108 (4)  | 63 ±1   | Admission for heart failure (18 ±15 months)         | RR: 0.81 (0.74 to 0.89)<br>NNT: 43 (31 to 74)<br>I <sup>2</sup> : 35%                  | Very low | Summary estimate                                                                                           |
| Kuenzli, 2010, 4206a | Congestive heart failure with left ventricular dysfunction                          | Angiotensin II receptor blocker and angiotensin converting enzyme inhibitor [ARB (Candesartan, Valsartan, Irbesartan, or other) and ACE inhibitor (Enalapril, Captopril, or other)] (19 per 100) | Angiotensin converting enzyme inhibitors [Enalapril, Captopril, or other] (24 per 100) | 17895 (6) | 64 ±2   | Readmission for heart failure (23 ±12 months)       | RR: 0.81 (0.72 to 0.91)<br>NNT: 22 (15 to 47)<br>I <sup>2</sup> : 57%                  | Moderate | Summary estimate                                                                                           |
| Jong, 2002, 3781d    | New York Heart Association functional class 2 to 7                                  | Angiotensin II receptor blocker and angiotensin converting enzyme inhibitor [ARB (Candesartan, Irbesartan, or Valsartan) and an ACE inhibitor] (4.8 per 100)                                     | Angiotensin converting enzyme inhibitors (6.4 per 100)                                 | 5560 (3)  | Unclear | Admission for heart failure (12 ±10 months)         | OR: 0.74 (0.64 to 0.86)<br>NNT: 63 (45 to 118)<br>I <sup>2</sup> : p>0.1 heterogeneity | Moderate | Sub-group by intervention: Combination therapy of Angiotensin receptor blockers and angiotensin            |

|                       |                                                                                                                                                 |                                                                                                                                                                                     |                                                                                                |               |         |                                                  |                                                                           |          |                                                                                         |
|-----------------------|-------------------------------------------------------------------------------------------------------------------------------------------------|-------------------------------------------------------------------------------------------------------------------------------------------------------------------------------------|------------------------------------------------------------------------------------------------|---------------|---------|--------------------------------------------------|---------------------------------------------------------------------------|----------|-----------------------------------------------------------------------------------------|
|                       |                                                                                                                                                 |                                                                                                                                                                                     |                                                                                                |               |         |                                                  |                                                                           |          | converting enzyme inhibitors vs. angiotensin converting enzyme inhibitors alone         |
| Kuenzli, 2010, 4206c  | Heart failure with left ventricular dysfunction                                                                                                 | Angiotensin II receptor blocker and angiotensin converting enzyme inhibitor<br>[ARB (Candesartan, Valsartan, or Irbesartan) and ACE inhibitor (Enalapril or other)]<br>(19 per 100) | Angiotensin converting enzyme inhibitors<br>[ACE inhibitor Enalapril or other]<br>(23 per 100) | 8049<br>(4)   | 64 ±2   | Readmission for heart failure<br>(22 ±14 months) | RR: 0.81 (0.72 to 0.91)<br>NNT: 23 (15 to 48)<br>I <sup>2</sup> : 23%     | Moderate | Sub-group by disease: Excluding 2 trials with only acute myocardial infarction patients |
| Makani, 2013, 4838b   | Heart failure with reduced ejection fraction (less than or equal to 40%), New York Heart Association class II-IV, with or without haemodialysis | Angiotensin II receptor blocker and angiotensin converting enzyme inhibitor<br>[ARB (Candesartan, Telmisartan, or Valsartan) and an ACE inhibitor]<br>(37 per 100)                  | Angiotensin converting enzyme inhibitors<br>(48 per 100)                                       | 7890<br>(3)   | 63 ±1   | Admission for heart failure<br>(36 ±10 months)   | RR: 0.77 (0.68 to 0.88)<br>NNT: 9 (7 to 18)<br>I <sup>2</sup> : 66%       | Moderate | Sub-group by disease: Heart failure                                                     |
| Lipinski, 2009, 4615e | Heart failure with reduced ejection fraction (less than or equal to 45%) or heart failure hospitalisation in past year                          | Atorvastatin<br>(10 per 100)                                                                                                                                                        | Placebo<br>(28 per 100)                                                                        | 472<br>(6)    | 57 ±12  | Admission for heart failure<br>(13 ±10 months)   | OR: 0.30 (0.18 to 0.49)<br>NNT: 6 (5 to 6)<br>I <sup>2</sup> : 0%         | Very low | Summary estimate                                                                        |
| Zhang, 2011, 8604f    | Chronic systolic cardiac insufficiency                                                                                                          | Atorvastatin<br>(9 per 100)                                                                                                                                                         | Placebo or nothing<br>(19 per 100)                                                             | 524<br>(8)    | 55 ±10  | Readmission for heart failure<br>(10 ±10 months) | RR: 0.51 (0.33 to 0.81)<br>NNT: 11 (8 to 28)<br>I <sup>2</sup> : 0%       | Low      | Sub-group by intervention: Atorvastatin                                                 |
| Liu, 2014, 4629a      | Heart failure with preserved ejection fraction (an EF greater than or equal to 40%)                                                             | Beta-blocker<br>[Nebivolol or Carvedilol]<br>(20 per 100)                                                                                                                           | No beta-blockers<br>(28 per 100)                                                               | 888<br>(2)    | 74 ±3   | Hospital admission<br>(30 ±12 months)            | RR: 0.71 (0.55 to 0.93)<br>NNT: 12 (8 to 51)<br>I <sup>2</sup> : 7%       | Moderate | Summary estimate                                                                        |
| Brophy, 2001, 1021    | Heart failure with reduced ejection fraction                                                                                                    | Beta-blocker<br>[Metoprolol, Bucindolol, Bisoprolol, or Carvedilol]<br>(7 per 100)                                                                                                  | Placebo<br>(12 per 100)                                                                        | 10076<br>(22) | 57 ±6   | Admission for heart failure<br>(9 ±6 months)     | OR: 0.64 (0.53 to 0.79)<br>NNT: 24 (18 to 43)<br>I <sup>2</sup> : Unclear | Low      | Summary estimate                                                                        |
| Fisher, 2015, 8770b   | Heart failure secondary to ischemic and nonischemic cardiomyopathy                                                                              | Bone marrow stem cells<br>(4 per 100)                                                                                                                                               | No cells<br>(10 per 100)                                                                       | 173<br>(5)    | Unclear | Readmission for heart failure<br>(26 ±28 months) | RR: 0.39 (0.22 to 0.7)<br>NNT: 16 (13 to 33)<br>I <sup>2</sup> : 0%       | Low      | Summary estimate                                                                        |

|                        |                                                                                                                        |                                                                                                                                                                                             |                                                                                     |            |         |                                                   |                                                                           |          |                                                                                         |
|------------------------|------------------------------------------------------------------------------------------------------------------------|---------------------------------------------------------------------------------------------------------------------------------------------------------------------------------------------|-------------------------------------------------------------------------------------|------------|---------|---------------------------------------------------|---------------------------------------------------------------------------|----------|-----------------------------------------------------------------------------------------|
| Hood, 2014, 3415       | Normal sinus rhythm with reduced or preserved ejection fractions                                                       | Digoxin (9 per 100)                                                                                                                                                                         | Placebo (12 per 100)                                                                | 7262 (4)   | 61 ±3   | Hospital admission (12 ±17 months)                | OR: 0.68 (0.61 to 0.75)<br>NNT: 28 (23 to 37)<br>I <sup>2</sup> : 29%     | High     | Summary estimate                                                                        |
| Ziff, 2015, 8931a      | Heart failure, any ejection fraction                                                                                   | Digoxin (63 per 100)                                                                                                                                                                        | Placebo (67 per 100)                                                                | 7788 (2)   | 65 ±2   | Hospital admission (37 months)                    | RR: 0.94 (0.9 to 0.99)<br>NNT: 25 (15 to 150)<br>I <sup>2</sup> : Unclear | Moderate | Summary estimate                                                                        |
| Ngo, 2010, 5606        | Heart failure with reduced left ejection fraction (less than or equal to 40%) and anemia                               | Erythropoiesis stimulating agent [Darbepoetin-alpha, Beta-erythropoietin, or Erythropoietin] (16 per 100)                                                                                   | Placebo or no treatment (25 per 100)                                                | 734 (9)    | 72 ±3   | Admission for heart failure (7 ±5 months)         | RR: 0.62 (0.44 to 0.87)<br>NNT: 11 (7 to 31)<br>I <sup>2</sup> : 0%       | Moderate | Summary estimate                                                                        |
| Gandhi, 2014, 2599a    | Acute decompensation                                                                                                   | Hypertonic saline solution plus intravenous furosemide (19 per 100)                                                                                                                         | Furosemide alone, with or without dietary restriction of sodium (37 per 100)        | 2032 (4)   | 74 ±0.4 | Readmission for heart failure (30 ±28 months)     | RR: 0.50 (0.33 to 0.76)<br>NNT: 5 (4 to 11)<br>I <sup>2</sup> : 61%       | Moderate | Summary estimate                                                                        |
| Jankowska, 2016, 8790a | Heart failure with reduced left ventricular ejection fraction and iron deficiency                                      | Intravenous iron [Iron sucrose or Ferric carboxymaltose] (6 per 100)                                                                                                                        | Placebo (20 per 100)                                                                | 835 (4)    | 69 ±5   | Admission for heart failure (7 ±5 months)         | OR: 0.28 (0.16 to 0.5)<br>NNT: 8 (6 to 11)<br>I <sup>2</sup> : 0%         | Moderate | Summary estimate                                                                        |
| Bonsu, 2016, 8729a     | Heart failure with reduced ejection fraction (<40%)                                                                    | Lipophilic statin [Atorvastatin, Simvastatin, Pitavastatin] (13 per 100)                                                                                                                    | Placebo (24 per 100)                                                                | 1165 (9)   | 57 ±9   | Admission for heart failure (13 ±12 months)       | OR: 0.49 (0.36 to 0.67)<br>NNT: 9 (7 to 15)<br>I <sup>2</sup> : 38%       | High     | Summary estimate                                                                        |
| Liu, 2014, 8826a       | Heart failure with reduced ejection fraction (left ventricular ejection fraction less than or equal to 45%)            | Lipophilic statin [Atorvastatin, or Simvastatin, Pitavastatin] (6 per 100)                                                                                                                  | Placebo or no statin (10 per 100)                                                   | 1087 (9)   | 58 ±10  | Admission for heart failure (13 ±12 months)       | RR: 0.60 (0.45 to 0.80)<br>NNT: 25 (18 to 50)<br>I <sup>2</sup> : 11%     | Moderate | Summary estimate                                                                        |
| Zhang, 2016, 8922I     | Heart failure with preserved ejection fraction (greater than or equal to 40%)                                          | Renin-angiotensin-aldosterone system inhibitors [Perindopril, Eplerenone, Irbesartan, Spironolactone, Irbesartan + diuretics, Ramipril + diuretics, Candesartan, or Quinapril] (12 per 100) | Placebo (14 per 100)                                                                | 11765 (8)  | 72 ±4   | Admission for heart failure (20 ±17 months)       | RR: 0.89 (0.82 to 0.97)<br>NNT: 66 (41 to 244)<br>I <sup>2</sup> : 0%     | Low      | Summary estimate                                                                        |
| Lipinski, 2009, 4615d  | Heart failure with reduced ejection fraction (less than or equal to 45%) or heart failure hospitalisation in past year | Statin [Atorvastatin, Rosuvastatin, or Simvastatin] (19 per 100)                                                                                                                            | Placebo (25 per 100)                                                                | 10193 (10) | 60 ±11  | Admission for heart failure (17 ±15 months)       | OR: 0.67 (0.50 to 0.90)<br>NNT: 15 (9 to 51)<br>I <sup>2</sup> : 64%      | Low      | Summary estimate                                                                        |
| Zhang, 2011, 8604b     | Systolic insufficiency                                                                                                 | Statin [Atorvastatin, Rosuvastatin, or Simvastatin] (12 per 100)                                                                                                                            | Placebo or nothing in addition to contemporary standard therapy of CHF (19 per 100) | 5561 (10)  | 59 ±10  | Readmission for heart failure (15 ±15 months)     | RR: 0.66 (0.44 to 0.98)<br>NNT: 16 (10 to 270)<br>I <sup>2</sup> : 29%    | Low      | Sub-group for robustness to trial exclusion: GISSI-HF study excluded (highest weighted) |
| Zhou, 2014, 8928       | Left ventricular ejection fraction less than or equal to 50%                                                           | Trimetazidine (7 per 100)                                                                                                                                                                   | Placebo (15 per 100)                                                                | 156 (4)    | 67 ±8   | Admission for cardiovascular issues (7 ±4 months) | RR: 0.43 (0.21 to 0.91)<br>NNT: 11 (8 to 72)<br>I <sup>2</sup> : 0%       | Very low | Summary estimate                                                                        |

| Other pulmonary heart diseases                           |                                                                                  |                                                                                                          |                                                  |          |                   |                                                                  |                                                                          |          |                  |
|----------------------------------------------------------|----------------------------------------------------------------------------------|----------------------------------------------------------------------------------------------------------|--------------------------------------------------|----------|-------------------|------------------------------------------------------------------|--------------------------------------------------------------------------|----------|------------------|
| Coeytaux, 2014, 8747a                                    | Pulmonary arterial hypertension                                                  | Endothelin receptor antagonist (5 per 100)                                                               | Placebo (13 per 100)                             | 606 (3)  | Unclear           | Hospital admission (Range 2 to 4 months)                         | OR: 0.34 (0.17 to 0.69)<br>NNT: 12 (9 to 27)<br>I <sup>2</sup> : 0%      | Low      | Summary estimate |
| Coeytaux, 2014, 8747b                                    | Pulmonary arterial hypertension                                                  | Phosphodiesterase inhibitors (5 per 100)                                                                 | Placebo (9 per 100)                              | 1011 (4) | Unclear           | Hospital admission (Range 2 to 4 months)                         | OR: 0.48 (0.25 to 0.91)<br>NNT: 22 (15 to 132)<br>I <sup>2</sup> : 0%    | Low      | Summary estimate |
| Diseases of the digestive system                         |                                                                                  |                                                                                                          |                                                  |          |                   |                                                                  |                                                                          |          |                  |
| Crohn disease [regional enteritis] or Ulcerative colitis |                                                                                  |                                                                                                          |                                                  |          |                   |                                                                  |                                                                          |          |                  |
| Costa, 2013, 1629a                                       | Crohn disease or ulcerative colitis                                              | Infliximab [Bosentan or Ambrisentan] (19 per 100)                                                        | Placebo (31 per 100)                             | 1736 (2) | 38 ±2             | Hospital admission (17 ±13 months)                               | OR: 0.51 (0.4 to 0.65)<br>NNT: 8 (6 to 12)<br>I <sup>2</sup> : 0%        | Moderate | Summary estimate |
| Hepatic failure                                          |                                                                                  |                                                                                                          |                                                  |          |                   |                                                                  |                                                                          |          |                  |
| Saab, 2015, 8884a                                        | Hepatic encephalopathy                                                           | Probiotics [Lactobacilli, Bifidobacteria, or Streptococcus thermophiles] (18 per 100)                    | No treatment, placebo, or lactulose (30 per 100) | 276 (4)  | Range 16 or older | Hospital admission (7 ±4 months)                                 | OR: 0.53 (0.33 to 0.86)<br>NNT: 9 (6 to 33)<br>I <sup>2</sup> : 0%       | Moderate | Summary estimate |
| Ulcerative colitis                                       |                                                                                  |                                                                                                          |                                                  |          |                   |                                                                  |                                                                          |          |                  |
| Lopez, 2015, 8829a                                       | Ulcerative colitis                                                               | Tumour necrosis factor antagonists (anti-TNF) (12 per 100)                                               | Placebo (17 per 100)                             | 1691 (2) | Unclear           | Admissions for ulcerative colitis (Unclear)                      | RR: 0.71 (0.56 to 0.9)<br>NNT: 20 (13 to 58)<br>I <sup>2</sup> : 0%      | Moderate | Summary estimate |
| Calculus of kidney and ureter                            |                                                                                  |                                                                                                          |                                                  |          |                   |                                                                  |                                                                          |          |                  |
| Campschroer, 2014, 1164                                  | Ureteral stones                                                                  | Alpha-blocker [Tamsulosin or Doxazosin] (13 per 100)                                                     | Standard therapy (38 per 100)                    | 313 (4)  | 36 ±6             | Hospital admission (23 ±7 days)                                  | RR: 0.35 (0.13 to 0.97)<br>NNT: 4 (3 to 88)<br>I <sup>2</sup> : 64%      | Very low | Summary estimate |
| Disorders resulting from impaired renal tubular function |                                                                                  |                                                                                                          |                                                  |          |                   |                                                                  |                                                                          |          |                  |
| Garside, 2007, 2640b                                     | Hyperparathyroidism secondary to end-stage renal disease in patients on dialysis | Cinacalcet (12 per 100)                                                                                  | Placebo (20 per 100)                             | 1184 (4) | 54                | Admission for cardiovascular issues (8 ±3 months)                | RR: 0.61 (0.43 to 0.86)<br>NNT: 13 (9 to 36)<br>I <sup>2</sup> : Unclear | Low      | Summary estimate |
| Systemic lupus erythematosus                             |                                                                                  |                                                                                                          |                                                  |          |                   |                                                                  |                                                                          |          |                  |
| Moore, 2006, 5371                                        | Systemic lupus erythematosus                                                     | Mycophenolate mofetil (2 per 100)                                                                        | Cyclophosphamide and steroid (19 per 100)        | 220 (2)  | 35 ±4             | Admission for drug-related adverse events (Range 3 to 84 months) | RR: 0.10 (0.04 to 0.50)<br>NNT: 6 (6 to 11)<br>I <sup>2</sup> : Unclear  | Very low | Summary estimate |
| Multiple sclerosis                                       |                                                                                  |                                                                                                          |                                                  |          |                   |                                                                  |                                                                          |          |                  |
| La Mantia, 2010, 4260                                    | Multiple sclerosis                                                               | Glatiramer acetate (12 per 100)                                                                          | Placebo (21 per 100)                             | 489 (2)  | 34 ±0.3           | Hospital admission (23 ±19 months)                               | RR: 0.60 (0.40 to 0.91)<br>NNT: 12 (8 to 54)<br>I <sup>2</sup> : 0%      | Moderate | Summary estimate |
| Diseases of the respiratory system                       |                                                                                  |                                                                                                          |                                                  |          |                   |                                                                  |                                                                          |          |                  |
| Asthma / Status Asmaticus                                |                                                                                  |                                                                                                          |                                                  |          |                   |                                                                  |                                                                          |          |                  |
| Rodrigo, 2005, 6568a                                     | Acute asthma                                                                     | Beta-2-agonists and anticholinergics [Glycopyrrolate, Ipratropium bromide or Oxitropium bromide] and B2- | Beta-2-agonists [Salbutamol] (27 per 100)        | 1556 (9) | Range 18 to 55    | Hospital admission (Length of emergency department stay)         | RR: 0.68 (0.53 to 0.86)<br>NNT: 11 (8 to 26)<br>I <sup>2</sup> : 14%     | Moderate | Summary estimate |

|                             |                                              |                                                                                                                             |                                                                              |           |                |                                                            |                                                                               |          |                                                                                  |
|-----------------------------|----------------------------------------------|-----------------------------------------------------------------------------------------------------------------------------|------------------------------------------------------------------------------|-----------|----------------|------------------------------------------------------------|-------------------------------------------------------------------------------|----------|----------------------------------------------------------------------------------|
|                             |                                              | agonists [Salbutamol]<br>(19 per 100)                                                                                       |                                                                              |           |                |                                                            |                                                                               |          |                                                                                  |
| Edmonds,<br>2012,<br>2159   | Acute asthma                                 | Early use of inhaled corticosteroids in the emergency department [Beclomethasone, Flunisolide, or Fluticasone] (11 per 100) | Placebo (26 per 100)                                                         | 377 (5)   | 38 ±8          | Hospital admission (Unclear)                               | OR: 0.35 (0.20 to 0.60)<br>NNT: 7 (5 to 12)<br>I <sup>2</sup> : 0%            | Moderate | Summary estimate                                                                 |
| Rowe,<br>2000,<br>6670      | Acute asthma                                 | Intravenous magnesium sulfate (45 per 100)                                                                                  | Placebo (88 per 100)                                                         | 422 (3)   | Range 18 to 70 | Hospital admission (Length of emergency department stay)   | OR: 0.11 (0.03 to 0.34)<br>NNT: 2 (1 to 6)<br>I <sup>2</sup> : Unclear        | Low      | Summary estimate                                                                 |
| Kew,<br>2014,<br>4002h      | Acute asthma                                 | Intravenous magnesium sulfate (27 per 100)                                                                                  | Placebo (34 per 100)                                                         | 1437 (8)  | Unclear        | Hospital admission (3 ±1 hours)                            | OR: 0.72 (0.57 to 0.91)<br>NNT: 14 (9 to 48)<br>I <sup>2</sup> : 35%          | High     | Sub-group by study quality: Removal of studies at high risk of bias for blinding |
| Jaeschke,<br>2008,<br>3639f | Chronic asthma using inhaled corticosteroids | Long acting beta agonists [Formoterol] with inhaled corticosteroids (0.3 per 100)                                           | Inhaled corticosteroids [same dose as intervention] (0.7 per 100)            | 5371 (8)  | 41 ±4          | Admission for asthma (Unclear)                             | OR: 0.49 (0.25 to 0.95)<br>NNT: 289 (196 to 2960)<br>I <sup>2</sup> : 0%      | Low      | Sub-group by intervention: Formoterol only and ICS dose same in both groups      |
| Jaeschke,<br>2008,<br>3640d | Chronic asthma using inhaled corticosteroids | Long acting beta agonists [Formoterol] with inhaled corticosteroids (0.47 per 100)                                          | Inhaled corticosteroids [same dose as intervention] (1 per 100)              | 5334 (10) | Unclear        | Admission for asthma (Unclear)                             | OR: 0.46 (0.23 to 0.93)<br>NNT: 183 (128 to 1416)<br>I <sup>2</sup> : Unclear | Low      | Sub-group by intervention: Same dose of ICS in intervention and control groups   |
| Jaeschke,<br>2008,<br>3640b | Chronic asthma using inhaled corticosteroids | Long acting beta agonists [Formoterol] with inhaled corticosteroids (0.6 per 100)                                           | Inhaled corticosteroids alone [some same dose, some higher dose] (1 per 100) | 1063 (16) | Unclear        | Admission for asthma (Unclear)                             | OR: 0.59 (0.37 to 0.93)<br>NNT: 228 (148 to 1338)<br>I <sup>2</sup> : Unclear | Low      | Summary estimate                                                                 |
| Shan,<br>2013,<br>7029b     | Acute asthma                                 | Nebulized magnesium sulfate (12 per 100)                                                                                    | Control (18 per 100)                                                         | 383 (6)   | Range 18 to 65 | Admission for asthma (Length of emergency department stay) | RR: 0.63 (0.43 to 0.92)<br>NNT: 15 (10 to 68)<br>I <sup>2</sup> : 0%          | Moderate | Summary estimate                                                                 |
| Rowe,<br>2007,<br>6677      | Acute asthma                                 | Oral or Intramuscular corticosteroid (CS) [Methylprednisolone or Dexamethasone] (4 per 100)                                 | Placebo (11 per 100)                                                         | 184 (3)   | Range 15 to 45 | Hospital admission (9±3 days)                              | RR: 0.35 (0.12 to 0.95)<br>NNT: 14 (11 to 185)<br>I <sup>2</sup> : 0%         | Low      | Summary estimate                                                                 |

|                                                                                                |                                                             |                                                                         |                                                  |           |         |                                                                          |                                                                          |          |                                                             |
|------------------------------------------------------------------------------------------------|-------------------------------------------------------------|-------------------------------------------------------------------------|--------------------------------------------------|-----------|---------|--------------------------------------------------------------------------|--------------------------------------------------------------------------|----------|-------------------------------------------------------------|
| Rodrigo, 1999, 6564a                                                                           | Acute asthma                                                | Parenteral or inhaled corticosteroids [Methylprednisolone] (12 per 100) | Placebo in the emergency department (18 per 100) | 480 (6)   |         | Admission for asthma (Range of 2 to 6 hours in the emergency department) | OR: 0.68 (0.47 to 0.99)<br>NNT: 17 (10 to 556)<br>I <sup>2</sup> :       | Low      | Summary estimate                                            |
| <b>Other chronic obstructive pulmonary disease</b>                                             |                                                             |                                                                         |                                                  |           |         |                                                                          |                                                                          |          |                                                             |
| Ni, 2014, 8850a                                                                                | Moderate to severe chronic obstructive pulmonary disease    | Acclidinium bromide (2 per 100)                                         | Placebo (3 per 100)                              | 5624 (10) | 64 ±3   | Admission for chronic obstructive pulmonary disease (14 ±8 months)       | OR: 0.64 (0.46 to 0.88)<br>NNT: 106 (70 to 321)<br>I <sup>2</sup> : 0%   | High     | Summary estimate                                            |
| Zou, 2016, 8933a                                                                               | Moderate to severe chronic obstructive pulmonary disease    | Acclidinium Bromide (2 per 100)                                         | Placebo (3 per 100)                              | 4788 (5)  | 63 ±1   | Admission for chronic obstructive pulmonary disease (7 ±4 months)        | OR: 0.64 (0.47 to 0.89)<br>NNT: 103 (7 to 339)<br>I <sup>2</sup> : 17%   | Moderate | Summary estimate                                            |
| Nannini, 2013, 5533g                                                                           | Moderate to severe chronic obstructive pulmonary disease    | Combined inhalers with Mometasone Furoate and Formoterol (2 per 100)    | Placebo (4 per 100)                              | 894 (2)   | 61 ±3   | Admission for chronic obstructive pulmonary disease (12 months)          | OR: 0.36 (0.15 to 0.86)<br>NNT: 38 (28 to 177)<br>I <sup>2</sup> : 0%    | Low      | Sub-group by intervention: Mometasone/formoterol 200/10 mcg |
| Kew, 2013, 4003e                                                                               | Moderate to severe chronic obstructive pulmonary disease    | Formoterol (3 per 100)                                                  | Placebo (4 per 100)                              | 2614 (6)  | 63 ±2   | Admission for chronic obstructive pulmonary disease (14 ±12 months)      | OR: 0.73 (0.54 to 0.99)<br>NNT: 91 (53 to 2488)<br>I <sup>2</sup> : 0%   | Low      | Summary estimate                                            |
| Kew, 2013, 4003a                                                                               | Moderate to severe chronic obstructive pulmonary disease    | Long-acting beta2-agonists [Formoterol or Salmeterol] (4 per 100)       | Placebo (5 per 100)                              | 3804 (7)  | 62 ±2   | Admission for chronic obstructive pulmonary disease (9 ±3 months)        | OR: 0.73 (0.56 to 0.95)<br>NNT: 77 (47 to 420)<br>I <sup>2</sup> : 10%   | Moderate | Summary estimate                                            |
| Cheyne, 2015, 8744d                                                                            | Moderate to severe chronic obstructive pulmonary disease    | Tiotropium (1 per 100)                                                  | Ipratropium bromide (2 per 100)                  | 1073 (2)  | 64 ±0.2 | Admission for chronic obstructive pulmonary disease (6 ±5 months)        | OR: 0.56 (0.31 to 0.99)<br>NNT: 102 (65 to 4551)<br>I <sup>2</sup> : 0%  | Moderate | Summary estimate                                            |
| Yohannes, 2011, 8511a                                                                          | Moderate to severe chronic obstructive pulmonary disease    | Tiotropium (7 per 100)                                                  | Placebo (8 per 100)                              | 11844 (9) | 65 ±2   | Admission for chronic obstructive pulmonary disease (15 ±15 months)      | OR: 0.89 (0.80 to 0.98)<br>NNT: 120 (65 to 663)<br>I <sup>2</sup> : 18%  | Low      | Summary estimate                                            |
| Chong, 2012, 1438a                                                                             | Moderate to severe chronic obstructive pulmonary disease    | Tiotropium (3.8 per 100)                                                | Long acting beta-2-agonist (4.8 per 100)         | 9267 (4)  | 63 ±1   | Admission for chronic obstructive pulmonary disease (7 ±4 months)        | OR: 0.87 (0.77 to 0.99)<br>NNT: 183 (103 to 2390)<br>I <sup>2</sup> : 0% | Moderate | Summary estimate                                            |
| Karner, 2014, 8692e                                                                            | Moderate to severe chronic obstructive pulmonary disease    | Tiotropium with soft mist inhaler (6 per 100)                           | Placebo (7 per 100)                              | 6522 (3)  | 65 ±1   | Admission for chronic obstructive pulmonary disease (9 ±5 months)        | OR: 0.82 (0.68 to 0.99)<br>NNT: 87 (49 to 1590)<br>I <sup>2</sup> : 0%   | Moderate | Sub-group by intervention: Soft mist inhaler                |
| <b>Other chronic obstructive pulmonary disease; Simple and mucopurulent chronic bronchitis</b> |                                                             |                                                                         |                                                  |           |         |                                                                          |                                                                          |          |                                                             |
| Poole, 2015, 8867                                                                              | Chronic obstructive pulmonary disease or Chronic bronchitis | Mucolytic [N-acetylcysteine, Erdosteine, or Carbocysteine] (19 per 100) | Placebo (25 per 100)                             | 1788 (4)  | 66 ±12  | Hospital admission (17 ±13 months)                                       | OR: 0.68 (0.52 to 0.89)<br>NNT: 15 (10 to 47)<br>I <sup>2</sup> : 58%    | Moderate | Summary estimate                                            |
| <b>Endocrine, nutritional and metabolic diseases</b>                                           |                                                             |                                                                         |                                                  |           |         |                                                                          |                                                                          |          |                                                             |
| <b>Malnourishment</b>                                                                          |                                                             |                                                                         |                                                  |           |         |                                                                          |                                                                          |          |                                                             |



|                                                                                                                                                                                                                                                                                                                                                  |                                                                                                             |                                                                                                                                                           |                                                             |          |                |                                                                   |                                                                          |          |                  |
|--------------------------------------------------------------------------------------------------------------------------------------------------------------------------------------------------------------------------------------------------------------------------------------------------------------------------------------------------|-------------------------------------------------------------------------------------------------------------|-----------------------------------------------------------------------------------------------------------------------------------------------------------|-------------------------------------------------------------|----------|----------------|-------------------------------------------------------------------|--------------------------------------------------------------------------|----------|------------------|
| Stratton, 2013, 7484a                                                                                                                                                                                                                                                                                                                            | Malnourished patients being discharged from the hospital to the community                                   | Oral nutritional supplements [Nova source liquid, Clinutren Soup and Clinutren, Fortisip, Fresubin, or Fortifresh] (21 per 100)                           | Usual care or dietary counselling (31 per 100)              | 852 (6)  | Range 51 to 92 | Readmission (13 ±4 months)                                        | OR: 0.59 (0.43 to 0.8)<br>NNT: 10 (7 to 22)<br>I <sup>2</sup> : Unclear  | Moderate | Summary estimate |
| Cawood, 2012, 1264                                                                                                                                                                                                                                                                                                                               | Malnourished patients or patients at-risk of disease-related malnutrition in hospital or community settings | High protein oral nutritional supplements (31 per 100)                                                                                                    | Placebo or usual care (44 per 100)                          | 546 (2)  | 65 ±17         | Readmission (5 ±2 months)                                         | OR: 0.59 (0.41 to 0.84)<br>NNT: 8 (5 to 24)<br>I <sup>2</sup> : 0%       | Low      | Summary estimate |
| <b>Factors influencing health status and contact with health services</b>                                                                                                                                                                                                                                                                        |                                                                                                             |                                                                                                                                                           |                                                             |          |                |                                                                   |                                                                          |          |                  |
| <b>Care involving dialysis</b>                                                                                                                                                                                                                                                                                                                   |                                                                                                             |                                                                                                                                                           |                                                             |          |                |                                                                   |                                                                          |          |                  |
| James, 2008, 3657                                                                                                                                                                                                                                                                                                                                | Patients on long term hemodialysis with a central venous catheter                                           | Topical prophylactic antibiotics [Mupirocin or Polysporin triple-antibiotic ointment] (1 per 100)                                                         | No antibiotic therapy (22 per 100)                          | 305 (2)  | 57 ±13         | Admission for infection (3 ±3 months)                             | rR: 0.06 (0.03 to 0.12)<br>NNT: 6 (5 to 8)<br>I <sup>2</sup> : Unclear   | Moderate | Summary estimate |
| <b>Hospitalised patients</b>                                                                                                                                                                                                                                                                                                                     |                                                                                                             |                                                                                                                                                           |                                                             |          |                |                                                                   |                                                                          |          |                  |
| <b>Other medical care</b>                                                                                                                                                                                                                                                                                                                        |                                                                                                             |                                                                                                                                                           |                                                             |          |                |                                                                   |                                                                          |          |                  |
| Renner, 2012, 6442a                                                                                                                                                                                                                                                                                                                              | Breast cancer patients receiving chemotherapy                                                               | Primary prophylactic colony-stimulating factors [Granulocyte colony-stimulating factors or Granulocyte-macrophage colony-stimulating factors] (1 per 100) | Placebo or no treatment (10 per 100)                        | 1149 (4) | Range 21 to 88 | Admission for febrile neutropenia with antibiotics (19 ±4 months) | RR: 0.13 (0.06 to 0.3)<br>NNT: 12 (11 to 15)<br>I <sup>2</sup> : 0%      | Low      | Summary estimate |
| <b>Patients receiving surgery</b>                                                                                                                                                                                                                                                                                                                |                                                                                                             |                                                                                                                                                           |                                                             |          |                |                                                                   |                                                                          |          |                  |
| Kumar, 2014, 8815a                                                                                                                                                                                                                                                                                                                               | Patients receiving day surgery                                                                              | Total intravenous anaesthesia using propofol (0.3 per 100)                                                                                                | Inhalational agents sevoflurane or desflurane (0.8 per 100) | 556 (5)  | 37 ±4          | Hospital admission (Unclear)                                      | OR: 0.35 (0.14 to 0.91)<br>NNT: 214 (162 to 1555)<br>I <sup>2</sup> : 0% | Low      | Summary estimate |
| <b>Special screening examination for neoplasms</b>                                                                                                                                                                                                                                                                                               |                                                                                                             |                                                                                                                                                           |                                                             |          |                |                                                                   |                                                                          |          |                  |
| Yang, 2015, 8918a                                                                                                                                                                                                                                                                                                                                | Patients undergoing prostate biopsy                                                                         | Antibiotics [Ofloxacin, Trimethoprim, Sulfonamide methoxazole, or Ciprofloxacin] (2 per 100)                                                              | Placebo or no treatment (13 per 100)                        | 650 (3)  | Unclear        | Hospital admission (Unclear)                                      | RR: 0.13 (0.03 to 0.55)<br>NNT: 9 (8 to 17)<br>I <sup>2</sup> : 0%       | Moderate | Summary estimate |
| <b>Supervision of high-risk pregnancy; Supervision of normal pregnancy</b>                                                                                                                                                                                                                                                                       |                                                                                                             |                                                                                                                                                           |                                                             |          |                |                                                                   |                                                                          |          |                  |
| Makrides, 2014, 4844                                                                                                                                                                                                                                                                                                                             | Normal or high-risk pregnancy                                                                               | Magnesium supplementation (8 per 100)                                                                                                                     | Placebo (12 per 100)                                        | 1158 (3) | Unclear        | Hospital admission (Unclear)                                      | RR: 0.65 (0.48 to 0.86)<br>NNT: 24 (16 to 60)<br>I <sup>2</sup> : 0%     | Moderate | Summary estimate |
| <b>Human immunodeficiency virus</b>                                                                                                                                                                                                                                                                                                              |                                                                                                             |                                                                                                                                                           |                                                             |          |                |                                                                   |                                                                          |          |                  |
| Grimwade, 2009, 2933a                                                                                                                                                                                                                                                                                                                            | Human Immunodeficiency Virus                                                                                | Cotrimoxazole (11 per 100)                                                                                                                                | Placebo (17 per 100)                                        | 764 (3)  | 34 ±2          | Hospital admission (Unclear)                                      | RR: 0.66 (0.48 to 0.92)<br>NNT: 17 (11 to 74)<br>I <sup>2</sup> : 91%    | Moderate | Summary estimate |
| <b>Mental and behavioural disorders</b>                                                                                                                                                                                                                                                                                                          |                                                                                                             |                                                                                                                                                           |                                                             |          |                |                                                                   |                                                                          |          |                  |
| <b>Schizophrenia and other types of schizophrenia-like psychoses (Acute and transient psychotic disorders; Bipolar affective disorder; Induced delusional disorder; Other nonorganic psychotic disorders; Persistent delusional disorders; Schizoaffective disorders; Schizophrenia; Schizotypal disorder; Unspecified nonorganic psychosis)</b> |                                                                                                             |                                                                                                                                                           |                                                             |          |                |                                                                   |                                                                          |          |                  |

|                                                  |                                                                                                        |                                                                                                                                                                                                                                                                                 |                                                                                                                                                                                      |           |         |                                                            |                                                                         |          |                                               |
|--------------------------------------------------|--------------------------------------------------------------------------------------------------------|---------------------------------------------------------------------------------------------------------------------------------------------------------------------------------------------------------------------------------------------------------------------------------|--------------------------------------------------------------------------------------------------------------------------------------------------------------------------------------|-----------|---------|------------------------------------------------------------|-------------------------------------------------------------------------|----------|-----------------------------------------------|
| Kishimoto, 2014, 4067b                           | Schizophrenia and other types of schizophrenia-like psychoses                                          | Fluphenazine depot [Fluphenazine Decanoate or Fulphenazine Enanthate] (23 per 100)                                                                                                                                                                                              | Oral antipsychotic drugs [Pimozide, Trifluoperazine, or Fulphenazine] (28 per 100)                                                                                                   | 197 (4)   | 44 ±7   | Hospital admission (12 ±3 months)                          | RR: 0.82 (0.67 to 0.99)<br>NNT: 20 (11 to 358)<br>I <sup>2</sup> : 0%   | Low      | Sub-group by intervention: Fluphenazine depot |
| Leucht, 2012, 4508a                              | Schizophrenia and other types of schizophrenia-like psychoses                                          | Maintenance/continuous treatment with antipsychotic drugs [Fluphenazine decanoate, Prochlorpromazine, Perphenazine, Chlorpromazine, Promazine, Trifluoperazine, Haloperidol, Olanzapine, Quetiapine, Paliperidone palmitate, Pimozide, Risperidone, Zuclopethixol] (12 per 100) | Placebo or no treatment (33 per 100)                                                                                                                                                 | 2090 (16) | 38 ±9   | Readmission (11 ±7 months)                                 | RR: 0.38 (0.27 to 0.55)<br>NNT: 5 (4 to 7)<br>I <sup>2</sup> : 45%      | High     | Summary estimate                              |
| Komossa, 2013, 4123i                             | Schizophrenia and other types of schizophrenia-like psychoses                                          | Olanzapine (11 per 100)                                                                                                                                                                                                                                                         | Ziprasidon (17 per 100)                                                                                                                                                              | 766 (2)   | 41 ±0.1 | Readmission (13 ±9 months)                                 | RD: -0.06 (-0.01 to -0.11)<br>NNT: 17 (9 to 100)<br>I <sup>2</sup> : 0% | Moderate | Summary estimate                              |
| Komossa, 2013, 4123b                             | Schizophrenia and other types of schizophrenia-like psychoses                                          | Olanzapine (11 per 100)                                                                                                                                                                                                                                                         | Quetiapin (20 per 100)                                                                                                                                                               | 876 (2)   | 40 ±0.4 | Readmission (13 ±9 months)                                 | RR: 0.56 (0.41 to 0.77)<br>NNT: 11 (8 to 22)<br>I <sup>2</sup> : 0%     | Moderate | Summary estimate                              |
| Kishimoto, 2013, 4065a                           | Schizophrenia                                                                                          | Second generation antipsychotics [Amisulpride, Clozapine, lloperidone, Olanzapine, Quetiapine, Risperidone, Sertindole, or Ziprasidone] (15 per 100)                                                                                                                            | First generation antipsychotics [Haloperidol] (21 per 100)                                                                                                                           | 2869 (12) | 33 ±6   | Hospital admission (13 ±4 months)                          | RR: 0.72 (0.58 to 0.9)<br>NNT: 17 (11 to 48)<br>I <sup>2</sup> : 18%    | Moderate | Summary estimate                              |
| <b>Mixed population</b>                          |                                                                                                        |                                                                                                                                                                                                                                                                                 |                                                                                                                                                                                      |           |         |                                                            |                                                                         |          |                                               |
| Hemkens, 2016, 8784a                             | Preventing cardiovascular events in patients with alcoholic cirrhosis or idiopathic pulmonary fibrosis | Colchicine (41 per 100)                                                                                                                                                                                                                                                         | Control (47 per 100)                                                                                                                                                                 | 599 (2)   | 61 ±8   | Hospital admission (49 ±33 months)                         | RR: 0.87 (0.77 to 0.99)<br>NNT: 16 (9 to 212)<br>I <sup>2</sup> : 0%    | Low      | Summary estimate                              |
| Makani, 2013, 4838a                              | Heart failure; heart failure and haemodialysis; diabetic nephropathy; high risk cardiovascular disease | Dual renin-angiotensin blockade [Angiotensin II receptor blocker (Candesartan, Telmisartan, Valsartan, or other), angiotensin converting enzyme inhibitor (any), direct renin inhibitor (Aliskiren)] (23 per 100)                                                               | Single renin-angiotensin blockade [Angiotensin II receptor blocker (Telmisartan), angiotensin converting enzyme inhibitor (Any), or direct renin inhibitor (Aliskiren)] (28 per 100) | 42071 (5) | 64 ±2   | Admission for heart failure (38 ±12 months)                | RR: 0.82 (0.74 to 0.92)<br>NNT: 20 (14 to 45)<br>I <sup>2</sup> : 68%   | Low      | Summary estimate                              |
| <b>Multi-morbidity</b>                           |                                                                                                        |                                                                                                                                                                                                                                                                                 |                                                                                                                                                                                      |           |         |                                                            |                                                                         |          |                                               |
| Baumeister, 2011 593                             | Depression in patients with recent acute coronary syndromes                                            | Atypical antidepressant or selective serotonin reuptake inhibitor [Mirtazapine; Sertraline; Fluoxetine] (15 per 100)                                                                                                                                                            | Placebo (23 per 100)                                                                                                                                                                 | 514 (3)   | 57 ±0.1 | Hospital admission (6 ±0.5 months)                         | OR: 0.58 (0.39 to 0.85)<br>NNT: 12 (8 to 37)<br>I <sup>2</sup> : 0%     | Very low | Summary estimate                              |
| <b>Pregnancy, childbirth and the puerperium"</b> |                                                                                                        |                                                                                                                                                                                                                                                                                 |                                                                                                                                                                                      |           |         |                                                            |                                                                         |          |                                               |
| Magee, 2012, 4812a                               | Mild to moderate, late-onset pre-eclampsia                                                             | Beta-blocker [Oxprenolol, Labetalol, or Metoprolol] (56 per 100)                                                                                                                                                                                                                | Placebo or no treatment (73 per 100)                                                                                                                                                 | 291 (3)   | Unclear | Hospital admission (Range from first week to babies birth) | RR: 0.77 (0.64 to 0.93)<br>NNT: 6 (4 to 20)<br>I <sup>2</sup> : 85%     | Low      | Summary estimate                              |

---

<sup>a</sup>Median hospitalisation event rate observed across the trials contributing to the pooled estimate. <sup>b</sup>Means and standard deviations for patient ages in years, unless otherwise specified. Mean of means and median ages in trials contributing to the pooled estimate. Not all included trials reported age in a form that could be averaged. <sup>c</sup>Means and standard deviations for length of follow-up across trials, unless otherwise specified. Mean of means, medians, and total study durations reported in trials contributing to the pooled estimate. Not all included trials reported follow-up in a form that could be averaged. <sup>d</sup>RR= risk ratio; OR=odds ratio; rR= rate ratio; HR= hazard ratio; RD= risk difference. <sup>e</sup>CI=confidence interval. <sup>f</sup>NNT= Number needed to treat to benefit by avoiding one hospital admission.

**Table S8. Trial information underpinning GRADED estimates**

| Review author, year, estimate ID | Trials                                                 | Intervention: specific drugs and dosing | Comparator: specific drugs and dosing | Country | Length of follow-up (months) | Follow-up measure | Age | Age measure | Number of intervention group events | Number of control group events | Number of intervention patients | Number of control patients |
|----------------------------------|--------------------------------------------------------|-----------------------------------------|---------------------------------------|---------|------------------------------|-------------------|-----|-------------|-------------------------------------|--------------------------------|---------------------------------|----------------------------|
| Afilalo, 2007 100c               | Goldbourt U, 1993 (PROVE-IT TIMI 22)                   | Atorvastatin 80 mg/day                  | Pravastatin 40 mg/day                 | Unclear | 24                           | Mean              | 58  | Mean        | 34                                  | 64                             | 2099                            | 2063                       |
|                                  | Gottlieb SS, 1998 (A to Z)                             | Simvastatin 80 mg/day                   | Simvastatin 20 mg/day                 | Unclear | 24                           | Mean              | 61  | Mean        | 72                                  | 98                             | 2265                            | 2232                       |
|                                  | Dargie HJ, 2001 (IDEAL)                                | Atorvastatin 80 mg/day                  | Simvastatin 20 mg/day                 | Unclear | 57.6                         | Mean              | 62  | Mean        | 99                                  | 123                            | 4439                            | 4449                       |
|                                  | Heart Protection Study Collaborative Group, 2002 (TNT) | Atorvastatin 80 mg/day                  | Atorvastatin 10 mg/day                | Unclear | 58.8                         | Mean              | 61  | Mean        | 122                                 | 164                            | 4995                            | 5006                       |
|                                  |                                                        |                                         |                                       |         |                              |                   |     |             |                                     |                                |                                 |                            |
| Review author, year, estimate ID | Trials                                                 | Intervention: specific drugs and dosing | Comparator: specific drugs and dosing | Country | Length of follow-up (months) | Follow-up measure | Age | Age measure | Number of intervention group events | Number of control group events | Number of intervention patients | Number of control patients |
| Brophy, 2001 1021                | Engelmeier et al (20)                                  | Metoprolol                              | Placebo                               | Unclear | 12                           | Mean              | 50  | Mean        | 1                                   | 4                              | 9                               | 16                         |
|                                  | Woodley et al. (36)                                    | Bucindolol                              | Placebo                               | Unclear | 3                            | Mean              | 52  | Mean        | 1                                   | 2                              | 29                              | 20                         |
|                                  | Waagstein et al. (21)                                  | Metoprolol                              | Placebo                               | Unclear | 18                           | Mean              | 49  | Mean        | 37                                  | 49                             | 194                             | 189                        |
|                                  | Fisher et al. (23)                                     | Metoprolol                              | Placebo                               | Unclear | 6                            | Mean              | 63  | Mean        | 1                                   | 8                              | 25                              | 25                         |
|                                  | Bristow et al. (24)                                    | Bucindolol                              | Placebo                               | Unclear | 3                            | Mean              | 55  | Mean        | 7                                   | 3                              | 105                             | 34                         |
|                                  | CIBISI. (25)                                           | Bisoprolol                              | Placebo                               | Unclear | 23                           | Mean              | 60  | Mean        | 54                                  | 82                             | 320                             | 321                        |
|                                  | Eichhorn et al. (26)                                   | Metoprolol                              | Placebo                               | Unclear | 3                            | Mean              | 48  | Mean        | 0                                   | 2                              | 15                              | 9                          |
|                                  | Metra et al. (27)                                      | Carvedilol                              | Placebo                               | Unclear | 4                            | Mean              | 51  | Mean        | 0                                   | 2                              | 20                              | 20                         |
|                                  | Olsen et al. (38)                                      | Carvedilol                              | Placebo                               | Unclear | 4                            | Mean              | 52  | Mean        | 2                                   | 0                              | 36                              | 23                         |
|                                  | Krum et al. (39)                                       | Carvedilol                              | Placebo                               | Unclear | 4                            | Mean              | 55  | Mean        | 1                                   | 2                              | 33                              | 16                         |
|                                  | Bristow et al. (29)                                    | Carvedilol                              | Placebo                               | Unclear | 6                            | Mean              | 63  | Mean        | 18                                  | 8                              | 261                             | 84                         |
|                                  | Packer et al. (30)                                     | Carvedilol                              | Placebo                               | Unclear | 6                            | Mean              | 60  | Mean        | 9                                   | 18                             | 133                             | 145                        |

|                                  | Colucci et al. (31)                                                          | Carvedilol                                                                                                                                                   | Placebo                                                                        | Unclear                       | 15                           | Mean               | 54   | Mean        | 9                                   | 9                              | 232                             | 134                        |
|----------------------------------|------------------------------------------------------------------------------|--------------------------------------------------------------------------------------------------------------------------------------------------------------|--------------------------------------------------------------------------------|-------------------------------|------------------------------|--------------------|------|-------------|-------------------------------------|--------------------------------|---------------------------------|----------------------------|
|                                  | Cohn et al. (32)                                                             | Carvedilol                                                                                                                                                   | Placebo                                                                        | Unclear                       | 8                            | Mean               | 58   | Mean        | 3                                   | 1                              | 70                              | 35                         |
|                                  | Aust/NZ (28)                                                                 | Carvedilol                                                                                                                                                   | Placebo                                                                        | Unclear                       | 19                           | Mean               | 67   | Mean        | 23                                  | 33                             | 208                             | 208                        |
|                                  | CIBIS-II (17)                                                                | Bisoprolol                                                                                                                                                   | Placebo                                                                        | Unclear                       | 15                           | Mean               | 61   | Mean        | 159                                 | 232                            | 1327                            | 1320                       |
|                                  | MERIT-HF (18)                                                                | Metoprolol                                                                                                                                                   | Placebo                                                                        | Unclear                       | 12                           | Mean               | 64   | Mean        | 200                                 | 294                            | 1990                            | 2001                       |
|                                  | RESOLVD (34)                                                                 | Metoprolol                                                                                                                                                   | Placebo                                                                        | Unclear                       | 6                            | Mean               | 62   | Mean        | 15                                  | 5                              | 214                             | 212                        |
|                                  |                                                                              |                                                                                                                                                              |                                                                                |                               |                              |                    |      |             |                                     |                                |                                 |                            |
| Review author, year, estimate ID | Trials                                                                       | Intervention: specific drugs and dosing                                                                                                                      | Comparator: specific drugs and dosing                                          | Country                       | Length of follow-up (months) | Follow-up measure  | Age  | Age measure | Number of intervention group events | Number of control group events | Number of intervention patients | Number of control patients |
| Cordina, 2005 1606a              | AFFIRM                                                                       | amiodarone, disopyramide, flecainide, moricizine, procainamide, propafenone, quinidine, sotalol, dofetilide or combinations chosen by the treating physician | beta-blockers, calcium-channel blockers, digoxin or combination of these drugs | Unclear                       | 42                           | Mean               | 69.7 | Mean        | 1374                                | 1220                           | 2033                            | 2027                       |
|                                  | PIAF                                                                         | amiodarone (600mg for 3 weeks, 200mg maintenance)                                                                                                            | diltiazem 90 mg twice or three times daily                                     | Unclear                       | 12                           | Follow-up duration | 61   | Mean        | 87                                  | 30                             | 127                             | 125                        |
|                                  |                                                                              |                                                                                                                                                              |                                                                                |                               |                              |                    |      |             |                                     |                                |                                 |                            |
| Review author, year, estimate ID | Trials                                                                       | Intervention: specific drugs and dosing                                                                                                                      | Comparator: specific drugs and dosing                                          | Country                       | Length of follow-up (months) | Follow-up measure  | Age  | Age measure | Number of intervention group events | Number of control group events | Number of intervention patients | Number of control patients |
| Costa, 2013 1629a                | Hannauer, 2002; Rutgeerts, 2004 (ACCENT 1)                                   | Infliximab: 5 mg/kg to 10mg/kg (15 mg/kg possible in one crossover group)                                                                                    | Placebo                                                                        | North America, Europe, Israel | 13.5                         | Follow-up duration | 35   | Median      | 44                                  | 71                             | 192                             | 188                        |
|                                  | Sands, 2004; Lichtenstein 2005 (ACCENT 2)                                    | Infliximab: 5 mg/kg (10 mg/kg possible in one crossover group)                                                                                               | Placebo                                                                        | North America, Europe, Israel | 13.5                         | Follow-up duration | 39   | Median      | 15                                  | 44                             | 139                             | 143                        |
|                                  | Targan, 1997                                                                 | Infliximab: 5 mg/kg to 20 mg/kg                                                                                                                              | Placebo                                                                        | North America, Europe         | 3                            | Follow-up duration | 38   | Median      | 2                                   | 0                              | 83                              | 25                         |
|                                  | Rutgeerts, 2005; Sandborn, 2009 (ACT 1/2)                                    | Infliximab: 5 mg/kg to 10 mg/kg                                                                                                                              | Placebo                                                                        | USA and Europe                | 13.5                         | Follow-up duration | 41   | Median      | 97                                  | 49                             | 484                             | 244                        |
|                                  | Jamerot, 2005; Gustavsson, 2010 (Swedish-Danish controlled infliximab study) | Infliximab: 5 mg/kg                                                                                                                                          | Placebo                                                                        | Sweden, Denmark               | 39                           | Follow-up duration | 37   | Mean        | 2                                   | 6                              | 24                              | 21                         |

| Review author, year, estimate ID | Trials                  | Intervention: specific drugs and dosing                                                                          | Comparator: specific drugs and dosing | Country | Length of follow-up (months) | Follow-up measure | Age | Age measure | Number of intervention group events | Number of control group events | Number of intervention patients | Number of control patients |
|----------------------------------|-------------------------|------------------------------------------------------------------------------------------------------------------|---------------------------------------|---------|------------------------------|-------------------|-----|-------------|-------------------------------------|--------------------------------|---------------------------------|----------------------------|
| Danchin, 2006 1752a              | Yusuf, 2000 (HOPE)      | Ramipril, 10 mg (administered in evening) for 7-10 d at 2.5 mg, followed by placebo for 10-14 d                  | Placebo                               | Unclear | 60                           | Mean              | 66  | Mean        | 141                                 | 160                            | 4645                            | 4652                       |
|                                  | MacMahon, 2000 (PART 2) | Ramipril, 5-10 mg                                                                                                | Placebo                               | Unclear | 56.4                         | Mean              | 61  | Mean        | 7                                   | 9                              | 308                             | 309                        |
|                                  | EUROPA4                 | Perindopril, 8 mg, for 4 wk                                                                                      | Placebo                               | Unclear | 50.4                         | Mean              | 60  | Mean        | 63                                  | 103                            | 6110                            | 6108                       |
|                                  | Fox, 2003 (PEACE)       | Trandolapril, 2 mg, for 6 mo, then either 2 mg or 4 mg at discretion of investigators if SBP 110 mm Hg, for 2 wk | Placebo                               | Unclear | 57.6                         | Median            | 64  | Mean        | 105                                 | 134                            | 4158                            | 4132                       |
|                                  | Nissen, 2004 (CAMELOT)  | Enalapril maleate, 10 mg twice a day (third arm, amlodipine maleate, 5 mg) twice a day                           | Placebo                               | Unclear | 24                           | Mean              | 58  | Mean        | 4                                   | 5                              | 673                             | 655                        |
|                                  |                         |                                                                                                                  |                                       |         |                              |                   |     |             |                                     |                                |                                 |                            |
| Review author, year, estimate ID | Trials                  | Intervention: specific drugs and dosing                                                                          | Comparator: specific drugs and dosing | Country | Length of follow-up (months) | Follow-up measure | Age | Age measure | Number of intervention group events | Number of control group events | Number of intervention patients | Number of control patients |

|                    |               |                                                                                                                                                                                                                                                                                                                            |                                             |         |         |                    |        |      |    |    |    |    |
|--------------------|---------------|----------------------------------------------------------------------------------------------------------------------------------------------------------------------------------------------------------------------------------------------------------------------------------------------------------------------------|---------------------------------------------|---------|---------|--------------------|--------|------|----|----|----|----|
| Gandhi, 2014 2599a | Licata, 2002  | If sodium $\geq 125$ mEq/L, given IV 150 cc of 4.6% NaCl, if sodium 126–135 mEq/L, given 150 cc of IV 3.5% NaCl, if sodium $\geq 135$ mEq/L, given 150 cc of IV 1.4%–2.4% NaCl. All patients supplemented with potassium chloride 20–40 mEq/L as necessary. Given twice daily. IV furosemide infusion 500–1000 mg daily    | IV furosemide infusion 500–1000 mg daily    | Unclear | 31      | Mean               | 74.599 | Mean | 25 | 43 | 53 | 54 |
|                    | Paterna, 2000 | If sodium $\geq 125$ mEq/L, given IV 150 cc of 4.6% NaCl, if sodium 126–135 mEq/L, given 150 cc of IV 3.5% NaCl, if sodium $\geq 135$ mEq/L, given 150 cc of IV 1.4%–2.4% NaCl. All patients supplemented with potassium chloride 20–40 mEq/L as necessary. Given twice daily. IV furosemide infusion 500–1000 mg daily    | IV furosemide infusion 500–1000 mg daily    | Unclear | 6 to 12 | Range              | 73.935 | Mean | 0  | 12 | 30 | 30 |
|                    | Paterna, 2005 | If sodium $\geq 125$ mEq/L, given 150 cc of IV 4.6% NaCl, if sodium 126–135 mEq/L, given 150 cc of IV 3.5% NaCl, if sodium $\geq 135$ mEq/L, given 150 cc of IV 1.4%–2.4% NaCl. All patients supplemented with potassium chloride 20–40 mEq/L as necessary. Given twice daily. IV furosemide bolus 500–1000 mg twice daily | IV furosemide bolus 500–1000 mg twice daily | Unclear | 1       | Follow-up duration | 74.602 | Mean | 0  | 12 | 48 | 46 |

|                                  | Paterna, 2011                | If sodium $\leq 125$ mEq/L, given 150 cc IV 4.6% NaCl, if sodium 126–135 mEq/L, given 150 cc IV 3.5% NaCl, if sodium $\geq 135$ mEq/L, given 150 cc IV 1.4%–2.4% NaCl. All patients supplemented with potassium chloride 20–40 mEq/L as necessary. Given twice daily. IV furosemide bolus 250 mg twice daily | IV furosemide bolus 250 mg twice daily | Unclear                             | 57                           | Mean               | 74.043                        | Mean        | 163                                 | 305                            | 881                                 | 890                                 |
|----------------------------------|------------------------------|--------------------------------------------------------------------------------------------------------------------------------------------------------------------------------------------------------------------------------------------------------------------------------------------------------------|----------------------------------------|-------------------------------------|------------------------------|--------------------|-------------------------------|-------------|-------------------------------------|--------------------------------|-------------------------------------|-------------------------------------|
|                                  |                              |                                                                                                                                                                                                                                                                                                              |                                        |                                     |                              |                    |                               |             |                                     |                                |                                     |                                     |
| Review author, year, estimate ID | Trials                       | Intervention: specific drugs and dosing                                                                                                                                                                                                                                                                      | Comparator: specific drugs and dosing  | Country                             | Length of follow-up (months) | Follow-up measure  | Age                           | Age measure | Number of intervention group events | Number of control group events | Number of intervention patients     | Number of control patients          |
| Garside, 2007 2640b              | Block, 2004 (Amgen 172)      | 30 mg cinacalcet orally, once daily. Dose increased, in 20-mg increments from 30 to 180 mg per day at 3- or 4-weekly intervals.                                                                                                                                                                              | Placebo                                | North America, Europe and Australia | 13                           | Follow-up duration | Trial level data not reported | Unclear     | 205                                 | 205                            | Trial specific numbers not reported | Trial specific numbers not reported |
|                                  | Block, 2004 (Amgen 183)      | 30 mg cinacalcet orally, once daily. Dose increased, in 30-mg increments from 30 to 180 mg per day at 3- or 4-weekly intervals.                                                                                                                                                                              | Placebo                                | North America, Europe and Australia | 6.5                          | Follow-up duration | Trial level data not reported | Unclear     | 166                                 | 165                            | Trial specific numbers not reported | Trial specific numbers not reported |
|                                  | Lien, 2005 (Amgen 188)       | 30 mg cinacalcet orally, once daily. Dose increased, in 30-mg increments from 30 to 180 mg per day at 3- or 4-weekly intervals.                                                                                                                                                                              | Placebo                                | USA                                 | 6.5                          | Follow-up duration | Trial level data not reported | Unclear     | 294                                 | 101                            | Trial specific numbers not reported | Trial specific numbers not reported |
|                                  | Lindberg, 200372 (Amgen 141) | 30 mg cinacalcet orally, once daily. Dose increased, in 30-mg increments from 30 to 180 mg per day at 3- or 4-weekly intervals.                                                                                                                                                                              | Placebo                                | USA and Canada                      | 6.5                          | Follow-up duration | Trial level data not reported | Unclear     | 32                                  | 16                             | Trial specific numbers not reported | Trial specific numbers not reported |
|                                  |                              |                                                                                                                                                                                                                                                                                                              |                                        |                                     |                              |                    |                               |             |                                     |                                |                                     |                                     |
| Review author, year, estimate ID | Trials                       | Intervention: specific drugs and dosing                                                                                                                                                                                                                                                                      | Comparator: specific drugs and dosing  | Country                             | Length of follow-up (months) | Follow-up measure  | Age                           | Age measure | Number of intervention group events | Number of control group events | Number of intervention patients     | Number of control patients          |





| Review author, year, estimate ID | Trials             | Intervention: specific drugs and dosing                     | Comparator: specific drugs and dosing    | Country                                                                                               | Length of follow-up (months) | Follow-up measure  | Age    | Age measure | Number of intervention group events | Number of control group events | Number of intervention patients | Number of control patients |
|----------------------------------|--------------------|-------------------------------------------------------------|------------------------------------------|-------------------------------------------------------------------------------------------------------|------------------------------|--------------------|--------|-------------|-------------------------------------|--------------------------------|---------------------------------|----------------------------|
| James, 2008 3657                 | Sesso, 1998        | Mupirocin ointment, 2%; heparin, 1000 U/mL                  | Povidone-iodine, 10%; heparin, 1000 U/mL | Brazil                                                                                                | 1.13                         | Mean               | 47     | Mean        | 5                                   | 14                             | 69                              | 67                         |
|                                  | Lok , 2003         | Polysporin triple-antibiotic ointment; heparin, 10 000 U/mL | Placebo ointment; heparin, 10 000 U/mL   | Canada                                                                                                | 4.77                         | Mean               | 66     | Mean        | 6                                   | 19                             | 83                              | 79                         |
|                                  |                    |                                                             |                                          |                                                                                                       |                              |                    |        |             |                                     |                                |                                 |                            |
| Review author, year, estimate ID | Trials             | Intervention: specific drugs and dosing                     | Comparator: specific drugs and dosing    | Country                                                                                               | Length of follow-up (months) | Follow-up measure  | Age    | Age measure | Number of intervention group events | Number of control group events | Number of intervention patients | Number of control patients |
| Kew, 2014 4004o                  | Tashkin 2008 SHINE | Budesonide 160 mcg × 2 inhalations (320 mcg) twice daily    | Placebo                                  | USA, Czech Republic, the Netherlands, Poland and South Africa                                         | 6                            | Follow-up duration | 63.296 | Mean        | 3                                   | 1                              | 275                             | 300                        |
|                                  | Shaker 2009        | Budesonide 400 mcg twice daily                              | Placebo                                  | Denmark                                                                                               | 24-48                        | Follow-up duration | 63.6   | Mean        | 10                                  | 3                              | 127                             | 127                        |
|                                  |                    |                                                             |                                          |                                                                                                       |                              |                    |        |             |                                     |                                |                                 |                            |
| Review author, year, estimate ID | Trials             | Intervention: specific drugs and dosing                     | Comparator: specific drugs and dosing    | Country                                                                                               | Length of follow-up (months) | Follow-up measure  | Age    | Age measure | Number of intervention group events | Number of control group events | Number of intervention patients | Number of control patients |
| Kew, 2014 4004r                  | Calverley 2010     | Budesonide/formoterol 400/12 mcg twice daily                | Formoterol 12 mcg twice daily            | 25 countries                                                                                          | 11                           | Follow-up duration | 63.901 | Mean        | 7                                   | 1                              | 242                             | 239                        |
|                                  | Fukuchi 2013       | Budesonide/formoterol combination 320/9 mcg twice daily     | Formoterol 9 mcg twice daily             | India, Japan, Republic of Korea, Phillipines, Poland, Russian Federation, Taiwan, Ukraine and Vietnam | 3                            | Follow-up duration | 65.059 | Mean        | 5                                   | 2                              | 636                             | 657                        |
|                                  | Rennard 2009       | Budesonide/formoterol 320/9 mcg twice daily                 | Formoterol 9 mcg twice daily             | USA, Europe and Mexico                                                                                | 12                           | Follow-up duration | 63.1   | Mean        | 5                                   | 4                              | 494                             | 247                        |
|                                  | Shaker 2009        | Budesonide 400 mcg twice daily                              | Placebo                                  | Denmark                                                                                               | 24-48                        | Follow-up duration | 63.6   | Mean        | 10                                  | 3                              | 127                             | 127                        |

|                                  | Sharafkhaneh 2012  | Budesonide/formoterol 320/9 mcg twice daily                                                                                                                                                                                                                                       | Formoterol DPI 9 mcg twice daily                           | United States, Central and South America, and South Africa    | 12                           | Follow-up duration | 63.369 | Mean        | 13                                  | 4                              | 407                             | 202                        |
|----------------------------------|--------------------|-----------------------------------------------------------------------------------------------------------------------------------------------------------------------------------------------------------------------------------------------------------------------------------|------------------------------------------------------------|---------------------------------------------------------------|------------------------------|--------------------|--------|-------------|-------------------------------------|--------------------------------|---------------------------------|----------------------------|
|                                  | Tashkin 2008 SHINE | Budesonide 160 mcg × 2 inhalations (320 mcg) twice daily                                                                                                                                                                                                                          | PLacebo                                                    | USA, Czech Republic, the Netherlands, Poland and South Africa | 6                            | Follow-up duration | 63.296 | Mean        | 3                                   | 1                              | 275                             | 300                        |
|                                  | Tashkin 2008 SHINE | Budesonide/formoterol 160/4.5 mcg × 2 inhalations (320/9 mcg) twice daily OR Budesonide/formoterol 80/4.5 mcg × 2 inhalations (160/9 mcg) twice daily OR Budesonide 160 mcg × 2 inhalations (320 mcg) twice daily plus formoterol DPI 4.5 mcg × 2 inhalations (9 mcg) twice daily | Formoterol DPI 4.5 mcg × 2 inhalations (9 mcg) twice daily | USA, Czech Republic, the Netherlands, Poland and South Africa | 6                            | Follow-up duration | 63.5   | Mean        | 3                                   | 1                              | 564                             | 142                        |
|                                  |                    |                                                                                                                                                                                                                                                                                   |                                                            |                                                               |                              |                    |        |             |                                     |                                |                                 |                            |
| Review author, year, estimate ID | Trials             | Intervention: specific drugs and dosing                                                                                                                                                                                                                                           | Comparator: specific drugs and dosing                      | Country                                                       | Length of follow-up (months) | Follow-up measure  | Age    | Age measure | Number of intervention group events | Number of control group events | Number of intervention patients | Number of control patients |
| Kew, 2014 4004z                  | Hanania 2003       | Fluticasone propionate 250 mcg twice daily                                                                                                                                                                                                                                        | Placebo                                                    | USA                                                           | 6                            | Follow-up duration | 63.499 | Mean        | 0                                   | 1                              | 178                             | 177                        |

|  |                         |                                                                |                                  |                                                                                                                                                                                                                                                                                                                                                                          |    |                       |        |      |     |    |      |      |
|--|-------------------------|----------------------------------------------------------------|----------------------------------|--------------------------------------------------------------------------------------------------------------------------------------------------------------------------------------------------------------------------------------------------------------------------------------------------------------------------------------------------------------------------|----|-----------------------|--------|------|-----|----|------|------|
|  | GSK SCO100470<br>2006   | Salmeterol/fluticasone<br>propionate 50/250 mcg twice<br>daily | Salmeterol 50 mcg<br>twice daily | Australia (10),<br>Bulgaria<br>(5),Croatia<br>(1),Czech Republic<br>(8), France (14),<br>Germany (18),<br>Greece (4), Italy<br>(16), Latvia (5),<br>Lithuania (2),<br>Netherlands (12),<br>Philippines (3),<br>Poland (5),<br>Romania (3),<br>Russian<br>Federation (8) ,<br>Slovakia (4),<br>Slovenia (4),<br>Sweden (4),<br>Thailand (4) and<br>United Kingdom<br>(5)) | 6  | Follow-up<br>duration | 63.601 | Mean | 2   | 4  | 518  | 532  |
|  | Kerwin 2013             | Fluticasone furoate 100 mcg<br>daily                           | Placebo                          | Chile, Estonia,<br>Germany, Japan,<br>Korea, Philippines,<br>Poland, Russian<br>Federation and the<br>United States                                                                                                                                                                                                                                                      | 6  | Follow-up<br>duration | 62.66  | Mean | 4   | 4  | 618  | 412  |
|  | GSK SCO30002<br>2005    | Fluticasone propionate 500<br>mcg twice daily                  | Placebo                          | Italy and Poland                                                                                                                                                                                                                                                                                                                                                         | 12 | Follow-up<br>duration | 65.137 | Mean | 1   | 1  | 131  | 125  |
|  | Martinez 2013           | Fluticasone furoate 100 mcg<br>or 200 mcg daily                | Placebo                          | Czech<br>Republic,Germany,<br>Japan, Poland,<br>Romania, Russian<br>Federation,<br>Ukraine and the<br>United States                                                                                                                                                                                                                                                      | 6  | Follow-up<br>duration | 61.617 | Mean | 5   | 2  | 816  | 408  |
|  | Anzueto 2009            | Fluticasone/salmeterol<br>250/50 mcg twice daily               | Salmeterol 50 mcg<br>twice daily | USA and Canada                                                                                                                                                                                                                                                                                                                                                           | 12 | Follow-up<br>duration | 65.349 | Mean | 13  | 8  | 394  | 403  |
|  | Calverley 2007<br>TORCH | Fluticasone 500 mcg twice<br>daily                             | Placebo                          | 25 countries                                                                                                                                                                                                                                                                                                                                                             | 36 | Follow-up<br>duration | 65.05  | Mean | 138 | 82 | 1546 | 1542 |
|  | Calverley 2007<br>TORCH | Fluticasone/salmeterol<br>500/50 mcg twice daily               | Salmeterol 50 mcg<br>twice daily | 25 countries                                                                                                                                                                                                                                                                                                                                                             | 36 | Follow-up<br>duration | 65     | Mean | 121 | 69 | 1552 | 1545 |

|                                  | GSK FLTA3025 2005  | Fluticasone propionate 250 mcg or 500 mcg twice daily                                 | Placebo                               | USA                                                                                                                                                                  | 6                            | Follow-up duration | 64.393 | Mean        | 4                                   | 1                              | 434                             | 206                        |
|----------------------------------|--------------------|---------------------------------------------------------------------------------------|---------------------------------------|----------------------------------------------------------------------------------------------------------------------------------------------------------------------|------------------------------|--------------------|--------|-------------|-------------------------------------|--------------------------------|---------------------------------|----------------------------|
|                                  | Hanania 2003       | Fluticasone/salmeterol 250/50 mcg twice daily                                         | Salmeterol 50 mcg twice daily         | USA                                                                                                                                                                  | 6                            | Follow-up duration | 64.005 | Mean        | 1                                   | 0                              | 183                             | 185                        |
|                                  | GSK SCO104925 2008 | Fluticasone propionate 500 mcg twice daily                                            | Placebo                               | Russian Federation, 4 centres in the United States, 2 centres in Chile and 1 centre in Estonia                                                                       | 3                            | Follow-up duration | 64.7   | Mean        | 1                                   | 0                              | 42                              | 42                         |
|                                  | Dransfield 2013    | Fluticasone furoate/vilanterol 50/25 mcg daily; 100/25 mcg daily; or 200/25 mcg daily | Vilanterol 25 daily                   | Argentina, Australia, Canada, Chile, Estonia, Germany, Italy, Mexico, Netherlands, Peru, Philippines, South Africa, Sweden, the United Kingdom and the United States | 12                           | Follow-up duration | 63.675 | Mean        | 72                                  | 8                              | 2437                            | 818                        |
|                                  | Kardos 2007        | Salmeterol/fluticasone 50/500 mcg twice daily                                         | Salmeterol 50 mcg twice daily         | Germany                                                                                                                                                              | 10                           | Follow-up duration | 63.898 | Mean        | 13                                  | 3                              | 507                             | 487                        |
|                                  |                    |                                                                                       |                                       |                                                                                                                                                                      |                              |                    |        |             |                                     |                                |                                 |                            |
| Review author, year, estimate ID | Trials             | Intervention: specific drugs and dosing                                               | Comparator: specific drugs and dosing | Country                                                                                                                                                              | Length of follow-up (months) | Follow-up measure  | Age    | Age measure | Number of intervention group events | Number of control group events | Number of intervention patients | Number of control patients |
| Kew, 2014 4004y                  | Tashkin 2008 SHINE | Budesonide 160 mcg × 2 inhalations (320 mcg) twice daily                              | Placebo twice daily                   | USA, Czech Republic, the Netherlands, Poland and South Africa                                                                                                        | 6                            | Follow-up duration | 68.045 | Mean        | 5                                   | 1                              | 845                             | 284                        |
|                                  | Fukuchi 2013       | Budesonide/formoterol combination 320/9 mcg twice daily                               | Formoterol 9 mcg twice daily          | India, Japan, Republic of Korea, Philippines, Poland, Russian Federation, Taiwan, Ukraine and Vietnam                                                                | 3                            | Follow-up duration | 65.059 | Mean        | 5                                   | 2                              | 636                             | 657                        |

|                                  | Tashkin 2008 SHINE     | Budesonide/formoterol 160/4.5 mcg × 2 inhalations (320/9 mcg) twice daily OR Budesonide/formoterol 80/4.5 mcg × 2 inhalations (160/9 mcg) twice daily OR Budesonide 160 mcg × 2 inhalations (320 mcg) twice daily plus formoterol DPI 4.5 mcg × 2 inhalations (9 mcg) twice daily | Formoterol DPI 4.5 mcg × 2 inhalations (9 mcg) twice daily          | USA, Czech Republic, the Netherlands, Poland and South Africa | 6                            | Follow-up duration | 63.296 | Mean        | 3                                   | 1                              | 275                             | 300                        |
|----------------------------------|------------------------|-----------------------------------------------------------------------------------------------------------------------------------------------------------------------------------------------------------------------------------------------------------------------------------|---------------------------------------------------------------------|---------------------------------------------------------------|------------------------------|--------------------|--------|-------------|-------------------------------------|--------------------------------|---------------------------------|----------------------------|
|                                  | Calverley 2010         | Budesonide/formoterol 400/12 mcg twice daily                                                                                                                                                                                                                                      | Formoterol 12 mcg twice daily                                       | 25 countries                                                  | 11                           | Follow-up duration | 63.902 | Mean        | 7                                   | 1                              | 242                             | 238                        |
|                                  |                        |                                                                                                                                                                                                                                                                                   |                                                                     |                                                               |                              |                    |        |             |                                     |                                |                                 |                            |
| Review author, year, estimate ID | Trials                 | Intervention: specific drugs and dosing                                                                                                                                                                                                                                           | Comparator: specific drugs and dosing                               | Country                                                       | Length of follow-up (months) | Follow-up measure  | Age    | Age measure | Number of intervention group events | Number of control group events | Number of intervention patients | Number of control patients |
| Kishimoto, 2013 4065a            | Kahn, 2008             | Amisulpride 450.8 (200-800) Mean dose (range/fixe (mg day 1))                                                                                                                                                                                                                     | Haloperidol 3 (1-4) Mean dose (range/fixe (mg day 1))               | Europe and Israel                                             | 12                           | Mean               | 26     | Mean        | 14                                  | 14                             | 88                              | 64                         |
|                                  | Essock, 1996           | Clozapine 496 Mean dose (range/fixe (mg day 1))                                                                                                                                                                                                                                   | First generation antipsychotics 1386 mean dose (range/fixe, mg day) | USA                                                           | 26                           | Mean               | 41.2   | Mean        | 13                                  | 20                             | 76                              | 48                         |
|                                  | Lieberman, 2003        | Clozapine 600 flexibe median mg day                                                                                                                                                                                                                                               | Not reported                                                        | China                                                         | 10                           | Mean               | 28.7   | Mean        | 6                                   | 5                              | 80                              | 80                         |
|                                  | Kane, 2008 (study 1-3) | lloperidone 11.8 (4-16) Mean dose (range/fixe (mg day 1))                                                                                                                                                                                                                         | Haloperidol 13.2 (5-20) Mean dose (range/fixe (mg day 1))           | International                                                 | 11.5                         | Mean               | 34.7   | Mean        | 27                                  | 7                              | 359                             | 114                        |
|                                  | Kahn, 2008             | Olanzapine 12.6 (5-20) Mean dose (range/fixe (mg day 1))                                                                                                                                                                                                                          | Haloperidol 3 (1-4) Mean dose (range/fixe (mg day 1))               | Europe and Israel                                             | 12                           | Mean               | 26     | Mean        | 18                                  | 14                             | 89                              | 64                         |
|                                  | Tran, 1998 (study 1)   | Olanzapine 12.1 (12) Mean dose (range/fixe (mg day 1))                                                                                                                                                                                                                            | Haloperidol 14 (14) Mean dose (range/fixe (mg day 1))               | International                                                 | 11.5                         | Mean               | 37     | Mean        | 10                                  | 2                              | 45                              | 10                         |
|                                  | Tran, 1998 (study 2)   | Olanzapine 11.5 (12) Mean dose (range/fixe (mg day 1))                                                                                                                                                                                                                            | Haloperidol 16.4 (16) Mean dose (range/fixe (mg day 1))             | International                                                 | 11.5                         | Mean               | 37     | Mean        | 6                                   | 3                              | 48                              | 14                         |
|                                  | Tran, 1998 (study 3)   | Olanzapine 13.9 (5-20) Mean dose (range/fixe (mg day 1))                                                                                                                                                                                                                          | Haloperidol 13.2 (5-20) Mean dose (range/fixe (mg day 1))           | International                                                 | 5.5 - 21                     | Range              | 37     | Mean        | 71                                  | 29                             | 534                             | 156                        |

|                                  | Kahn, 2008       | Quetiapine 498.6 (250-700) Mean dose (range/fixed (mg day 1))             | Haloperidol 3 (1-4) Mean dose (range/fixed (mg day 1))      | Europe and Israel | 12                           | Mean               | 26       | Mean        | 14                                  | 14                             | 60                              | 64                         |
|----------------------------------|------------------|---------------------------------------------------------------------------|-------------------------------------------------------------|-------------------|------------------------------|--------------------|----------|-------------|-------------------------------------|--------------------------------|---------------------------------|----------------------------|
|                                  | Csernansky, 2002 | Risperidone 4.9 (2-8) Mean dose (range/fixed (mg day 1))                  | Haloperidol 11.7 (5-20) Mean dose (range/fixed (mg day 1))  | USA               | 12                           | Mean               | 40.2     | Mean        | 20                                  | 36                             | 177                             | 188                        |
|                                  | de Sena, 2003    | Risperidone 4.0 (flexible) median dose ((mg day 1))                       | Haloperidol 10 (flexible) Median dose (mg day 1))           | Brazil            | 12                           | Mean               | 27.7     | Mean        | 6                                   | 3                              | 20                              | 13                         |
|                                  | Gaebel, 2007     | Risperidone 4.2 (2-4) Mean dose (range/fixed (mg day 1))                  | haloperidol 4.1 (2-4) Mean dose (range/fixed (mg day 1))    | Germany           | 12                           | Mean               | 31.6     | Mean        | 7                                   | 7                              | 77                              | 74                         |
|                                  | Daniel, 1998     | Sertindole 24 Mean dose (range/fixed (mg day 1))                          | Haloperidol 10 mean dose (mg day 1))                        | USA               | 12                           | Mean               | 37       | Mean        | 2                                   | 12                             | 94                              | 109                        |
|                                  | Kahn, 2008       | Ziprasidone 107.2 (40-160) Mean dose (range/fixed (mg day 1))             | Haloperidol 3 (1-4) Mean dose (range/fixed (mg day 1))      | Europe and Israel | 12                           | Mean               | 26       | Mean        | 4                                   | 14                             | 60                              | 64                         |
|                                  |                  |                                                                           |                                                             |                   |                              |                    |          |             |                                     |                                |                                 |                            |
| Review author, year, estimate ID | Trials           | Intervention: specific drugs and dosing                                   | Comparator: specific drugs and dosing                       | Country           | Length of follow-up (months) | Follow-up measure  | Age      | Age measure | Number of intervention group events | Number of control group events | Number of intervention patients | Number of control patients |
| Kishimoto, 2014 4067b            | Barnes 1983      | Fulphenazine decanoate (dose not reported, same dose as before the trial) | Pimozide (dose not reported, same dose as before the trial) | UK                | 12                           | Follow-up duration | 49.5     | Mean        | 3                                   | 3                              | 19                              | 17                         |
|                                  | Crawford 1974    | Fulphenazine decanoate (dose not reported, same dose as before the trial) | Trifluoperazine 10 mg/d (fixed)                             | UK                | 9.3                          | Follow-up duration | 20 to 65 | Range       | 0                                   | 4                              | 14                              | 15                         |
|                                  | Del Giudice 1975 | Fulphenazine Enanthate 25 mg/2 wks (fixed)                                | Fulphenazine 21.7 mg (5-80 mg)                              | USA               | 16                           | Follow-up duration | 20 to 50 | Range       | 21                                  | 59                             | 27                              | 61                         |
|                                  | Falloon 1978     | Fulphenazine decanoate 25 mg/2 wks (flexible)                             | Pimozide 8 mg/d (flexible)                                  | UK                | 12                           | Follow-up duration | 39       | Mean        | 7                                   | 7                              | 20                              | 24                         |
|                                  |                  |                                                                           |                                                             |                   |                              |                    |          |             |                                     |                                |                                 |                            |
| Review author, year, estimate ID | Trials           | Intervention: specific drugs and dosing                                   | Comparator: specific drugs and dosing                       | Country           | Length of follow-up (months) | Follow-up measure  | Age      | Age measure | Number of intervention group events | Number of control group events | Number of intervention patients | Number of control patients |
| Kuenzli, 2010 4206a              | RESOLVD 1999     | Candesartan 16mg once daily and Enalapril 10mg twice                      | Enalapril 10mg twice daily                                  | Unclear           | 9.6                          | Follow-up duration | 63.753   | Mean        | 31                                  | 7                              | 332                             | 109                        |
|                                  | Arutiunov 2000   | ARB and an ACE inhibitor (not specified)                                  | Not specified                                               | Unclear           | 30                           | Follow-up duration | 64       | Mean        | 15                                  | 57                             | 35                              | 70                         |







| Review author, year, estimate ID | Trials                | Intervention: specific drugs and dosing                                                                              | Comparator: specific drugs and dosing                                                            | Country | Length of follow-up (months)                      | Follow-up measure  | Age     | Age measure | Number of intervention group events | Number of control group events | Number of intervention patients | Number of control patients |
|----------------------------------|-----------------------|----------------------------------------------------------------------------------------------------------------------|--------------------------------------------------------------------------------------------------|---------|---------------------------------------------------|--------------------|---------|-------------|-------------------------------------|--------------------------------|---------------------------------|----------------------------|
| Makani, 2013 4838b               | CHARM Added 2003      | Any ACE inhibitor and candesartan                                                                                    | Any ACE inhibitor                                                                                | Unclear | 44.5                                              | Mean               | 64      | Mean        | 309                                 | 356                            | 1276                            | 1272                       |
|                                  | Cice 2010             | Any ACE inhibitor and telmisartan                                                                                    | Any ACE inhibitor                                                                                | Unclear | 39                                                | Mean               | 63      | Mean        | 56                                  | 92                             | 162                             | 167                        |
|                                  | Val HeFT 2001         | Any ACE inhibitor and valsartan                                                                                      | Any ACE inhibitor                                                                                | Unclear | 25                                                | Mean               | 63      | Mean        | 923                                 | 1189                           | 2511                            | 2499                       |
|                                  |                       |                                                                                                                      |                                                                                                  |         |                                                   |                    |         |             |                                     |                                |                                 |                            |
| Review author, year, estimate ID | Trials                | Intervention: specific drugs and dosing                                                                              | Comparator: specific drugs and dosing                                                            | Country | Length of follow-up (months)                      | Follow-up measure  | Age     | Age measure | Number of intervention group events | Number of control group events | Number of intervention patients | Number of control patients |
| Moore, 2006 5371                 | Chan 2005             | oral mycophenolate mofetil 2 g daily plus oral prednisolone (32), 1.5g daily at 6 months, and 1 g daily at 12 months | oral cyclophosphamide 2.5 mg/kg/day plus prednisolone (30), replaced by azathioprine at 6 months | Unclear | 84                                                | Maximum duration   | 37      | Mean        | 2                                   | 9                              | 30                              | 32                         |
|                                  | Ginzler 2005          | Oral mycophenolate mofetil 1 g daily to maximum of 3 g daily                                                         | IV cyclophosphamide 0.5 g/sq metre increasing to 1.0 g/sq metre, at monthly intervals            | Unclear | 3 to 6                                            | Follow-up duration | 32      | Mean        | 0                                   | 7                              | 83                              | 75                         |
|                                  |                       |                                                                                                                      |                                                                                                  |         |                                                   |                    |         |             |                                     |                                |                                 |                            |
| Review author, year, estimate ID | Trials                | Intervention: specific drugs and dosing                                                                              | Comparator: specific drugs and dosing                                                            | Country | Length of follow-up (months)                      | Follow-up measure  | Age     | Age measure | Number of intervention group events | Number of control group events | Number of intervention patients | Number of control patients |
| Rodrigo, 1999 6564a              | Stein and Cole 4      | IV methylprednisolone (125 mg) within 30 min of arrival in the emergency department                                  | IV Placebo                                                                                       | Unclear | Range of 2 to 6 hours in the emergency department | Follow-up duration | Unclear | Unclear     | 8                                   | 6                              | 44                              | 47                         |
|                                  | Rodrigo and Rodrigo 5 | IV methylprednisolone (500 mg) within 30 min of arrival in the emergency department                                  | IV Placebo                                                                                       | Unclear |                                                   | Follow-up duration | Unclear | Unclear     | 5                                   | 4                              | 49                              | 49                         |
|                                  | Lin et al 6           | IV methylprednisolone (125 mg) within 30 min of arrival in the emergency department                                  | IV Placebo                                                                                       | Unclear |                                                   | Follow-up duration | Unclear | Unclear     | 7                                   | 4                              | 23                              | 22                         |

|                                  | Littenberg and Gluck 30    | IV methylprednisolone (125 mg) within 30 min of arrival in the emergency department                            | IV placebo                                             | Unclear     |                                                                 | Follow-up duration | Unclear  | Unclear     | 9                                   | 23                             | 48                              | 49                         |
|----------------------------------|----------------------------|----------------------------------------------------------------------------------------------------------------|--------------------------------------------------------|-------------|-----------------------------------------------------------------|--------------------|----------|-------------|-------------------------------------|--------------------------------|---------------------------------|----------------------------|
|                                  | Schneider et al 33         | IV methylprednisolone (30 mg/kg) within 30 min of arrival in the emergency department                          | IV placebo                                             | Unclear     |                                                                 | Follow-up duration | Unclear  | Unclear     | 5                                   | 12                             | 27                              | 27                         |
|                                  |                            |                                                                                                                |                                                        |             |                                                                 |                    |          |             |                                     |                                |                                 |                            |
| Review author, year, estimate ID | Trials                     | Intervention: specific drugs and dosing                                                                        | Comparator: specific drugs and dosing                  | Country     | Length of follow-up (months)                                    | Follow-up measure  | Age      | Age measure | Number of intervention group events | Number of control group events | Number of intervention patients | Number of control patients |
| Rodrigo, 2005 6568a              | Cydulka and Emerman (1994) | Glycopyrrolate 2 mg nebulised (once) and Salbutamol 2.5 mg every 60 min nebulised (three times)                | Salbutamol 2.5 mg every 60 min nebulised (three times) | USA         | Length of emergency department stay, exact lengths not reported | Unclear            | Over 18  | Cut-off     | 18                                  | 15                             | 60                              | 65                         |
|                                  | FitzGerald et al (1997)    | Ipratropium bromide 0.5 mg nebulised (once) and Salbutamol 3 mg nebulised (once)                               | Salbutamol 3 mg nebulised (once)                       | Canada      | Length of emergency department stay, exact lengths not reported | Unclear            | 18 to 50 | Range       | 9                                   | 17                             | 156                             | 155                        |
|                                  | Lin et al (1998)           | Ipratropium bromide 0.5 mg nebulised (once) and Salbutamol 2.5 mg every 20 min nebulised (three times)         | Salbutamol 2.5 mg every 20 min nebulised (three times) | USA         | Length of emergency department stay, exact lengths not reported | Unclear            | over 18  | Cut-off     | 3                                   | 10                             | 27                              | 28                         |
|                                  | Karpel et al (1996)        | Ipratropium bromide 0.5 mg every 45 min nebulised (twice) and Salbutamol 2.5 mg every 45 min nebulised (twice) | Salbutamol 2.5 mg every 45 min nebulised (twice)       | USA         | Length of emergency department stay, exact lengths not reported | Unclear            | 18 to 55 | Range       | 22                                  | 25                             | 192                             | 192                        |
|                                  | Garret et al (1997)        | Ipratropium bromide 0.5 mg every 45 min nebulised (twice) and Salbutamol 2.5 mg every 45 min nebulised (twice) | Salbutamol 2.5 mg every 45 min nebulised (twice)       | New Zealand | Length of emergency department stay, exact lengths not reported | Unclear            | 18 to 55 | Range       | 26                                  | 37                             | 171                             | 167                        |

|                                  |                                       |                                                                                                                                                           |                                                                       |         |                                                                 |                   |          |             |                                     |                                |                                 |                            |
|----------------------------------|---------------------------------------|-----------------------------------------------------------------------------------------------------------------------------------------------------------|-----------------------------------------------------------------------|---------|-----------------------------------------------------------------|-------------------|----------|-------------|-------------------------------------|--------------------------------|---------------------------------|----------------------------|
|                                  | Weber et al (1999)                    | Ipratropium bromide 1 mg every 60 min nebulised (three times) and Salbutamol 10 mg every 60 min nebulised (three times)                                   | Salbutamol 10 mg every 60 min nebulised (three times)                 | USA     | Length of emergency department stay, exact lengths not reported | Unclear           | over 18  | Cut-off     | 8                                   | 13                             | 34                              | 33                         |
|                                  | Rodrigo and Rodrigo (2000) (moderate) | Ipratropium bromide 0.08 mg every 10 min metered dose inhaler (for three hours) and Salbutamol 0.4 mg every 10 min metered dose inhaler (for three hours) | Salbutamol 0.4 mg every 10 min metered dose inhaler (for three hours) | Uruguay | Length of emergency department stay, exact lengths not reported | Unclear           | 18 to 50 | Range       | 2                                   | 6                              | 28                              | 22                         |
|                                  | Rodrigo and Rodrigo (1995)            | Ipratropium bromide 0.08 mg every 10 min metered dose inhaler (three times) and Salbutamol 0.4 mg every 10 min metered dose inhaler (three times)         | Salbutamol 0.4 mg every 10 min metered dose inhaler (for three hours) | Uruguay | Length of emergency department stay, exact lengths not reported | Unclear           | 18 to 50 | Range       | 1                                   | 3                              | 11                              | 11                         |
|                                  | Nakano (2000)                         | Oxipropium bromide 0.4 mg every 20 min metered dose inhaler (for three hours) and Salbutamol 0.4 mg every 20 min metered dose inhaler (for three hours)   | Salbutamol 0.4 mg every 20 min metered dose inhaler (for three hours) | Japan   | Length of emergency department stay, exact lengths not reported | Unclear           | over 18  | Cut-off     | 5                                   | 10                             | 38                              | 36                         |
|                                  | Rodrigo and Rodrigo (2000) [severe]   | Ipratropium bromide 0.08 mg every 10 min metered dose inhaler (for three hours) and Salbutamol 0.4 mg every 10 min metered dose inhaler (for three hours) | Salbutamol 0.4 mg every 10 min metered dose inhaler (for three hours) | Uruguay | Length of emergency department stay, exact lengths not reported | Unclear           | 18 to 50 | Range       | 16                                  | 30                             | 60                              | 70                         |
|                                  |                                       |                                                                                                                                                           |                                                                       |         |                                                                 |                   |          |             |                                     |                                |                                 |                            |
| Review author, year, estimate ID | Trials                                | Intervention: specific drugs and dosing                                                                                                                   | Comparator: specific drugs and dosing                                 | Country | Length of follow-up (months)                                    | Follow-up measure | Age      | Age measure | Number of intervention group events | Number of control group events | Number of intervention patients | Number of control patients |
| Rowe, 2000 6670                  | Bloch et al 40                        | 2-g loading dose over 20 minutes, within 30 minutes of arrival to the emergency department                                                                | 50 mL saline solution                                                 | USA     | Length of emergency department stay, exact lengths not reported | Unclear           | 18 to 65 | Range       | 7                                   | 11                             | 21                              | 14                         |

|                                  | Skobeloff et al 38 | 1.2-g loading dose over 20 minutes, within 90 minutes of arrival to the emergency department                                                                                                                             | 50 mL saline solution                                                                                                                                                                                                              | USA     | Length of emergency department stay, exact lengths not reported | Unclear            | 18 to 70 | Range       | 7                                   | 15                             | 19                              | 19                         |
|----------------------------------|--------------------|--------------------------------------------------------------------------------------------------------------------------------------------------------------------------------------------------------------------------|------------------------------------------------------------------------------------------------------------------------------------------------------------------------------------------------------------------------------------|---------|-----------------------------------------------------------------|--------------------|----------|-------------|-------------------------------------|--------------------------------|---------------------------------|----------------------------|
|                                  | Silverman et al 42 | 2-g loading dose over 20 minutes, within 30 minutes of arrival to the emergency department                                                                                                                               | 50 mL saline solution                                                                                                                                                                                                              | USA     | Length of emergency department stay, exact lengths not reported | Unclear            | 18 to 60 | Range       | unclear                             | 127                            | 122                             | 127                        |
|                                  |                    |                                                                                                                                                                                                                          |                                                                                                                                                                                                                                    |         |                                                                 |                    |          |             |                                     |                                |                                 |                            |
| Review author, year, estimate ID | Trials             | Intervention: specific drugs and dosing                                                                                                                                                                                  | Comparator: specific drugs and dosing                                                                                                                                                                                              | Country | Length of follow-up (months)                                    | Follow-up measure  | Age      | Age measure | Number of intervention group events | Number of control group events | Number of intervention patients | Number of control patients |
| Saha , 2007 6746b                | HOPE 2000          | Ramipril                                                                                                                                                                                                                 | Placebo                                                                                                                                                                                                                            | Unclear | 12                                                              | Mean               | 66       | Mean        | 141                                 | 160                            | 4645                            | 4652                       |
|                                  | EUROPA 2003        | Perindopril                                                                                                                                                                                                              | Placebo                                                                                                                                                                                                                            | Unclear | 12                                                              | Mean               | 60       | Mean        | 63                                  | 103                            | 6110                            | 6108                       |
|                                  | PEACE 2004         | Trandolapril                                                                                                                                                                                                             | Placebo                                                                                                                                                                                                                            | Unclear | 12                                                              | Mean               | 64       | Mean        | 105                                 | 134                            | 4158                            | 4132                       |
|                                  |                    |                                                                                                                                                                                                                          |                                                                                                                                                                                                                                    |         |                                                                 |                    |          |             |                                     |                                |                                 |                            |
| Review author, year, estimate ID | Trials             | Intervention: specific drugs and dosing                                                                                                                                                                                  | Comparator: specific drugs and dosing                                                                                                                                                                                              | Country | Length of follow-up (months)                                    | Follow-up measure  | Age      | Age measure | Number of intervention group events | Number of control group events | Number of intervention patients | Number of control patients |
| Sampson, 2013 6806f              | Remington 2011     | Intermittent: "same daily dose administered every other day" (n = 6 risperidone, n = 11 olanzapine)                                                                                                                      | Maintenance: "treatment as usual" (n = 8 risperidone, n = 8 olanzapine, n = 2 loxapine)                                                                                                                                            | Canada  | 6                                                               | Follow-up duration | 39       | Mean        | 1                                   | 4                              | 17                              | 18                         |
|                                  | Herz 1991*         | Intermittent: received placebo injection, mean daily dose 149.7 mg ± 179.3 mg chlorpromazine equivalents (average cumulative antipsychotic drug dosage during prodromal episodes over two years = 487.19 mg ± 370.68 mg) | Maintenance: usual dose of antipsychotic medication mean daily dose 290.0 mg ± 146.7 mg chlorpromazine equivalents (average cumulative antipsychotic drug dosage during prodromal episodes over two years = 424.84 mg ± 333.05 mg) | USA     | 24                                                              | Follow-up duration | 36       | Mean        | 12                                  | 8                              | 50                              | 51                         |

|  |                 |                                                                                                                                                                                                                                                                                                                                                                                                                                                                                                                                                                                                                                            |                                                                                                                                                                                                                                                                                                                            |     |    |                    |      |      |    |    |    |    |
|--|-----------------|--------------------------------------------------------------------------------------------------------------------------------------------------------------------------------------------------------------------------------------------------------------------------------------------------------------------------------------------------------------------------------------------------------------------------------------------------------------------------------------------------------------------------------------------------------------------------------------------------------------------------------------------|----------------------------------------------------------------------------------------------------------------------------------------------------------------------------------------------------------------------------------------------------------------------------------------------------------------------------|-----|----|--------------------|------|------|----|----|----|----|
|  | Carpenter 1990* | <p>Intermittent: targeted administration of medication: medication administered on an 'as-needed basis' to participants who were otherwise drug-free.</p> <p>Participants remained drug-free until symptoms appeared that were suggestive of a prodromal phase of a psychotic episode, mean daily dose 173 mg <math>\pm</math> 69 mg chlorpromazine/4.4 mg <math>\pm</math> 1.1 mg haloperidol equivalents</p>                                                                                                                                                                                                                             | <p>Maintenance: continuous administration of medication: continued receiving medication - dose levels were raised when prodromal symptoms appeared and lowered when re-stabilisation occurred, mean daily dose of 433 mg <math>\pm</math> 46 mg chlorpromazine/11.8 mg <math>\pm</math> 4.4 mg haloperidol equivalents</p> | USA | 24 | Follow-up duration | 28.1 | Mean | 30 | 21 | 57 | 59 |
|  | Carpenter 1987  | <p>Intermittent: targeted medication: medication administered on an 'as-needed basis' to participants who were otherwise drug-free. Antipsychotic treatment was initiated at moderate to high doses when prodromal experiences occurred, and discontinued when the participant returned to a stable clinical state.</p> <p>Participants were treated within context of psychosocial intervention and were assigned to a primary therapist (e.g. psychiatric social worker or masters-level psychologist) for weekly sessions of approximately 45 minutes - mean daily dose 196 mg <math>\pm</math> 163 mg (chlorpromazine equivalents)</p> | <p>Maintenance: continuous medication: minimum daily chlorpromazine-equivalent doses of 300mg* were administered combined with brief visits with a pharmacotherapist on alternate weeks - mean daily dose 720 mg <math>\pm</math> 732 mg (chlorpromazine equivalents)</p>                                                  | USA | 24 | Follow-up duration | 31   | Mean | 11 | 10 | 21 | 21 |

|                                  | Schooler 1997    | Intermittent: fluphenazine decanoate: targeted, early intervention - an injection of sesame oil or miglioil "vehicle" (placebo) every 2 weeks (if subjects showed prodromal signs of relapse, open-label rescue medication was added; either oral fluphenazine or fluphenazine decanoate)                         | Maintenance: fluphenazine decanoate: continuous standard dose - 12.5-50mg every 2 weeks, n = 52 (AFM) n = 55 (SFM); Maintenance: fluphenazine decanoate: continuous low dose - 2.5-10mg every 2 weeks, n = 54 (AFM) n = 52 (SFM) | USA         | 24                                                              | Follow-up duration | 36.5     | Mean        | 46                                  | 54                             | 100                             | 213                        |
|----------------------------------|------------------|-------------------------------------------------------------------------------------------------------------------------------------------------------------------------------------------------------------------------------------------------------------------------------------------------------------------|----------------------------------------------------------------------------------------------------------------------------------------------------------------------------------------------------------------------------------|-------------|-----------------------------------------------------------------|--------------------|----------|-------------|-------------------------------------|--------------------------------|---------------------------------|----------------------------|
|                                  | Jolley 1989/1990 | Intermittent: equivalent doses of placebo injections, with brief intermittent course of antipsychotics begun at the earliest sign of relapse (prodromal symptoms - appearance of non-psychotic symptoms), average cumulative antipsychotic drug dosage (haloperidol equivalents) over two years = 298 mg ± 249 mg | Maintenance: continued to receive fluphenazine decanoate in clinically optimal (pretrial) doses, average cumulative antipsychotic drug dosage (mg haloperidol equivalents) over two years = 1616 mg ± 598 mg                     | UK          | 24                                                              | Follow-up duration | 41       | Mean        | 11                                  | 4                              | 27                              | 27                         |
|                                  |                  |                                                                                                                                                                                                                                                                                                                   |                                                                                                                                                                                                                                  |             |                                                                 |                    |          |             |                                     |                                |                                 |                            |
| Review author, year, estimate ID | Trials           | Intervention: specific drugs and dosing                                                                                                                                                                                                                                                                           | Comparator: specific drugs and dosing                                                                                                                                                                                            | Country     | Length of follow-up (months)                                    | Follow-up measure  | Age      | Age measure | Number of intervention group events | Number of control group events | Number of intervention patients | Number of control patients |
| Shan, 2013 7029b                 | Nannini 2000     | 3 ml isotonic MgSO <sub>4</sub> (7.5 g/100 ml) single dose with b-agonist (salbutamol)                                                                                                                                                                                                                            | 3 ml saline solution. Salbutamol.                                                                                                                                                                                                | Argentina   | Length of emergency department stay, exact lengths not reported | Unclear            | Over 18  | Cut-off     | 1                                   | 1                              | 19                              | 16                         |
|                                  | Hughes 2003      | 2.5 ml isotonic MgSO <sub>4</sub> (151 mg/dose)(3 doses at 30 min intervals) with b-agonist 2.5 mg (salbutamol) and 100 mg hydrocortisone intravenous                                                                                                                                                             | 2.5 ml isotonic saline solution. B-agonist 2.5 mg (salbutamol) and 100 mg hydrocortisone intravenous                                                                                                                             | New Zealand | Length of emergency department stay, exact lengths not reported | Unclear            | 16 to 65 | Range       | 12                                  | 17                             | 28                              | 24                         |

|                                  | Kokturk 2005            | Iso-osmolar MgSO4 (6.3%, 145 mg/dose) (20 min intervals) with b-agonist 2.5 mg (salbutamol) and 1 mg/kg methylprednisolone intravenous                                                                        | 2.5 ml isotonic saline solution b-agonist 2.5 mg (salbutamol) and 1 mg/kg methylprednisolone intravenous                                  | Turkey  | Length of emergency department stay, exact lengths not reported | Unclear            | 18 to 60    | Range       | 1                                   | 2                              | 14                              | 12                         |
|----------------------------------|-------------------------|---------------------------------------------------------------------------------------------------------------------------------------------------------------------------------------------------------------|-------------------------------------------------------------------------------------------------------------------------------------------|---------|-----------------------------------------------------------------|--------------------|-------------|-------------|-------------------------------------|--------------------------------|---------------------------------|----------------------------|
|                                  | Aggarwal 2006           | 1 ml MgSO4 (500 mg) (3 doses, 20 min apart) with b-agonist (salbutamol) 1 ml or more and intravenous hydrocortisone at discretion of physician                                                                | 1.5 ml distilled water 7.5 ml normal saline b-agonist (Salbutamol) 1 ml or more and intravenous hydrocortisone at discretion of physician | India   | Length of emergency department stay, exact lengths not reported | Unclear            | 13 to 60    | Range       | 9                                   | 10                             | 50                              | 50                         |
|                                  | Drobina 2006            | 125 mg MgSO4 0.25 ml of 50% solution (3 doses, 20 min apart) with b-agonist 5 mg/ml (albuterol) and 50 mg oral prednisolone                                                                                   | 0.25 ml saline solution b-agonist 5 mg/ml albuterol and 50 mg oral prednisolone                                                           | USA     | Length of emergency department stay, exact lengths not reported | Unclear            | 12 to 60    | Range       | 2                                   | 1                              | 60                              | 50                         |
|                                  | allegos-Solorzano 2010  | 3 ml (333 mg) of 10% isotonic MgSO4 (3 doses, 20 min apart) with b-agonist 7.5 mg of (albuterol) and 125 mg methylprednisolone intravenous                                                                    | 3 ml of isotonic saline solution and b-agonist 7.5 mg of albuterol and 125 mg methylprednisolone intravenous.                             | Mexico  | Length of emergency department stay, exact lengths not reported | Unclear            | over 18     | Cut-off     | 5                                   | 13                             | 30                              | 30                         |
|                                  |                         |                                                                                                                                                                                                               |                                                                                                                                           |         |                                                                 |                    |             |             |                                     |                                |                                 |                            |
| Review author, year, estimate ID | Trials                  | Intervention: specific drugs and dosing                                                                                                                                                                       | Comparator: specific drugs and dosing                                                                                                     | Country | Length of follow-up (months)                                    | Follow-up measure  | Age         | Age measure | Number of intervention group events | Number of control group events | Number of intervention patients | Number of control patients |
| Stratton, 2013 7484a             | Chapman et al. (2009)   | Nova source liquid (Novartis) + dietary advice (oral nutritional supplement given several hours after meals in divided doses) 475 kcal, 21.4 g protein. oral nutritional supplement energy density 2 kcal/ml. | No treatment group (standard care + placebo testosterone + dietary advice)                                                                | Unclear | 12                                                              | Follow-up duration | 65 or older | Cut off     | 4                                   | 5                              | 13                              | 13                         |
|                                  | Gariballa et al. (2006) | Liquid oral nutritional supplement 995 kcal, 49.75 g protein. oral nutritional supplement energy density 2.49 kcal/ml.                                                                                        | Placebo 60 kcal (0.15 kcal/ml) but no micronutrients/protein                                                                              | Unclear | 1.5                                                             | Follow-up duration | 65 to 92    | Range       | 65                                  | 89                             | 223                             | 222                        |



|                                  | Gazzotti et al. (2003) | Clinutren Soup and Clinutren 1.5 (2 supplements/ day) (Nestle) 500 kcal, 21 g (Intake 407 kcal, 16.9 g). oral nutritional supplement energy density (1.25 kcal/ml)                                                                                                                                        | Standard care – no supplementation                                                                                         | Unclear      | 2                            | Follow-up duration | 75 or older | Cut-off     | 4                                   | 3                              | 39                              | 41                         |
|----------------------------------|------------------------|-----------------------------------------------------------------------------------------------------------------------------------------------------------------------------------------------------------------------------------------------------------------------------------------------------------|----------------------------------------------------------------------------------------------------------------------------|--------------|------------------------------|--------------------|-------------|-------------|-------------------------------------|--------------------------------|---------------------------------|----------------------------|
|                                  | Miller et al. (2006)   | Fortisip (Nutricia) Administered as 4 doses of equal volume. 870–1200 kcal, 34.8–48 g (Intake 583–804 kcal, 23.3–32.2 g, calculated from 67% reported compliance) oral nutritional supplement energy density (1.5 kcal/ml).                                                                               | Control: (equal number of visits as oral nutritional supplement group when given general advice on nutrition and exercise) | Unclear      | 1.5                          | Follow-up duration | 70 or older | Cut-off     | 2                                   | 4                              | 25                              | 26                         |
|                                  | Norman et al. (2011)   | Fresubin Protein energy drink, (Fresenius) plus dietary counselling (Advised to take oral nutritional supplement slowly and in between meals) Up to 900 kcal 60 g (Intake = 2.4 ± 0.8 oral nutritional supplement, calculated as 720 kcal, 48 g) oral nutritional supplement energy density (1.5 kcal/ml) | Dietary counselling only                                                                                                   | Unclear      | 3                            | Follow-up duration | 51          | Mean        | 17                                  | 26                             | 60                              | 54                         |
|                                  | Price et al. (2005)    | Fortisip and Fortifresh (Nutricia) 600 kcal, 24 g (Intake 372 kcal, 14.9 g calculated from 62% reported compliance) oral nutritional supplement energy density (1.5 kcal/ml)                                                                                                                              | Receiving usual care                                                                                                       | Unclear      | 2                            | Follow-up duration | 75          | Cut-off     | 10                                  | 17                             | 66                              | 70                         |
|                                  |                        |                                                                                                                                                                                                                                                                                                           |                                                                                                                            |              |                              |                    |             |             |                                     |                                |                                 |                            |
| Review author, year, estimate ID | Trials                 | Intervention: specific drugs and dosing                                                                                                                                                                                                                                                                   | Comparator: specific drugs and dosing                                                                                      | Country      | Length of follow-up (months) | Follow-up measure  | Age         | Age measure | Number of intervention group events | Number of control group events | Number of intervention patients | Number of control patients |
| Kew, 2014 4004e                  | Verhoeven 2002         | Fluticasone propionate 500 mcg twice daily                                                                                                                                                                                                                                                                | Placebo                                                                                                                    | Netherlands  | 6                            | Follow-up duration | 55.13       | Mean        | 0                                   | 0                              | 10                              | 13                         |
|                                  | Mahler 2002            | Fluticasone 500 mcg twice daily                                                                                                                                                                                                                                                                           | Placebo                                                                                                                    | Unclear      | 6                            | Follow-up duration | 64.193      | Mean        | 2                                   | 0                              | 168                             | 181                        |
|                                  | Hanania 2003           | Fluticasone propionate 250 mcg twice daily                                                                                                                                                                                                                                                                | Placebo                                                                                                                    | USA          | 6                            | Follow-up duration | 64.005      | Mean        | 1                                   | 0                              | 183                             | 185                        |
|                                  | Calverley 2003 TRISTAN | Fluticasone 500 mcg twice daily                                                                                                                                                                                                                                                                           | Placebo                                                                                                                    | 25 countries | 12                           | Follow-up duration | 63.451      | Mean        | 9                                   | 3                              | 375                             | 363                        |

|  |                        |                                                           |                               |                                                                                                                 |    |                    |        |      |     |    |      |      |
|--|------------------------|-----------------------------------------------------------|-------------------------------|-----------------------------------------------------------------------------------------------------------------|----|--------------------|--------|------|-----|----|------|------|
|  | GSK FLTA3025 2005      | Fluticasone propionate 250 mcg or 500 mcg twice daily     | Placebo                       | USA                                                                                                             | 6  | Follow-up duration | 64.424 | Mean | 4   | 1  | 434  | 206  |
|  | GSK SCO30002 2005      | Fluticasone propionate 500 mcg twice daily                | Placebo                       | Italy and Poland                                                                                                | 12 | Follow-up duration | 65.137 | Mean | 1   | 1  | 131  | 125  |
|  | Calverley 2007 TORCH   | Fluticasone 500 mcg twice daily                           | Placebo                       | 42 countries                                                                                                    | 36 | Follow-up duration | 65     | Mean | 121 | 69 | 1552 | 1545 |
|  | GSK SCO104925 2008     | Fluticasone propionate 500 mcg twice daily                | Placebo                       | 4 centres in the Russian Federation, 4 centres in the United States, 2 centres in Chile and 1 centre in Estonia | 3  | Follow-up duration | 64.7   | Mean | 1   | 0  | 42   | 42   |
|  | Lapperre 2009          | Fluticasone 500 mcg twice daily                           | Placebo                       | Netherlands                                                                                                     | 30 | Follow-up duration | 60.418 | Mean | 0   | 2  | 26   | 29   |
|  | Kerwin 2013            | Fluticasone furoate 100 mcg daily                         | Placebo                       | Chile, Estonia, Germany, Japan, Korea, Philippines, Poland, Russian Federation and the United States            | 6  | Follow-up duration | 62.399 | Mean | 2   | 1  | 206  | 207  |
|  | Martinez 2013          | Fluticasone furoate 100 mcg or 200 mcg daily              | Placebo                       | Czech Republic, Germany, Japan, Poland, Romania, Russian Federation, Ukraine and the United States              | 6  | Follow-up duration | 61.833 | Mean | 2   | 0  | 407  | 205  |
|  | Mahler 2002            | Fluticasone/Salmeterol combination 500/50 mcg twice daily | Salmeterol 50 mcg twice daily | 65 centres                                                                                                      | 6  | Follow-up duration | 62.688 | Mean | 2   | 0  | 165  | 160  |
|  | Calverley 2003 TRISTAN | Fluticasone/salmeterol 500/50 mcg twice daily             | Salmeterol 50 mcg twice daily | 25 countries                                                                                                    | 12 | Follow-up duration | 62.955 | Mean | 7   | 9  | 358  | 373  |
|  | Hanania 2003           | Fluticasone/salmeterol 250/50 mcg twice daily             | Salmeterol 50 mcg twice daily | USA                                                                                                             | 6  | Follow-up duration | 63.499 | Mean | 0   | 1  | 178  | 177  |

|  |                         |                                                                 |                                  |                                                                                                                                                                                                                                                                                                                                                                         |    |                       |        |      |     |    |      |      |
|--|-------------------------|-----------------------------------------------------------------|----------------------------------|-------------------------------------------------------------------------------------------------------------------------------------------------------------------------------------------------------------------------------------------------------------------------------------------------------------------------------------------------------------------------|----|-----------------------|--------|------|-----|----|------|------|
|  | GSK SCO100470<br>2006   | Salmeterol/fluticasone<br>propionate 50/250 mcg twice<br>daily  | Salmeterol 50 mcg<br>twice daily | Australia (10),<br>Bulgaria<br>(5),Croatia<br>(1),Czech Republic<br>(8), France (14),<br>Germany (18),<br>Greece (4), Italy<br>(16), Latvia (5),<br>Lithuania (2),<br>Netherlands (12),<br>Philippines (3),<br>Poland (5),<br>Romania (3),<br>Russian<br>Federation (8) ,<br>Slovakia (4),<br>Slovenia (4),<br>Sweden (4),<br>Thailand (4) and<br>United Kingdom<br>(5) | 6  | Follow-up<br>duration | 63.601 | Mean | 2   | 4  | 518  | 532  |
|  | Kardos 2007             | Salmeterol/fluticasone 50/500<br>mcg twice daily                | Salmeterol 50 mcg<br>twice daily | Germany                                                                                                                                                                                                                                                                                                                                                                 | 10 | Follow-up<br>duration | 63.898 | Mean | 13  | 3  | 507  | 487  |
|  | Calverley 2007<br>TORCH | Fluticasone/salmeterol<br>500/50 mcg twice daily                | Salmeterol 50 mcg<br>twice daily | 42 countries                                                                                                                                                                                                                                                                                                                                                            | 36 | Follow-up<br>duration | 65.05  | Mean | 138 | 82 | 1546 | 1542 |
|  | GSK SCO40041<br>2008    | Fluticasone<br>propionate/salmeterol 250/50<br>mcg twice daily  | Salmeterol 50 mcg<br>twice daily | USA                                                                                                                                                                                                                                                                                                                                                                     | 36 | Follow-up<br>duration | 65.653 | Mean | 5   | 4  | 92   | 94   |
|  | GSK SCO104925<br>2008   | Fluticasone/salmeterol<br>combination 500/50 mcg<br>twice daily | Salmeterol 50 mcg<br>twice daily | 4 centres in the<br>Russian<br>Federation, 4<br>centres in the<br>United States, 2<br>centres in Chile<br>and 1 centre in<br>Estonia                                                                                                                                                                                                                                    | 36 | Follow-up<br>duration | 63.797 | Mean | 0   | 0  | 39   | 38   |
|  | Ferguson 2008           | Fluticasone/salmeterol<br>250/50 mcg twice daily                | Salmeterol 50 mcg<br>twice daily | USA and Canada                                                                                                                                                                                                                                                                                                                                                          | 12 | Follow-up<br>duration | 64.95  | Mean | 19  | 10 | 394  | 388  |
|  | Anzueto 2009            | Fluticasone/salmeterol<br>250/50 mcg twice daily                | Salmeterol 50 mcg<br>twice daily | USA and Canada                                                                                                                                                                                                                                                                                                                                                          | 12 | Follow-up<br>duration | 65.349 | Mean | 13  | 8  | 394  | 403  |

|                                  | Kerwin 2013     | Fluticasone 50 mcg or 100 mcg/ vilanterol 25 mcg daily                                                                                  | Fluticasone 100 mcg/ vilanterol 25 mcg daily | Chile, Estonia, Germany, Japan, Korea, Philippines, Poland, Russian Federation and the United States                                                                 | 6                            | Follow-up duration | 62.832 | Mean        | 2                                   | 3                              | 412                             | 205                        |
|----------------------------------|-----------------|-----------------------------------------------------------------------------------------------------------------------------------------|----------------------------------------------|----------------------------------------------------------------------------------------------------------------------------------------------------------------------|------------------------------|--------------------|--------|-------------|-------------------------------------|--------------------------------|---------------------------------|----------------------------|
|                                  | Dransfield 2013 | Fluticasone furoate/vilanterol 50/25 mcg daily; 100/25 mcg daily; or 200/25 mcg daily                                                   | Vilanterol 25 daily                          | Argentina, Australia, Canada, Chile, Estonia, Germany, Italy, Mexico, Netherlands, Peru, Philippines, South Africa, Sweden, the United Kingdom and the United States | 12                           | Follow-up duration | 63.675 | Mean        | 72                                  | 8                              | 2437                            | 818                        |
|                                  | Martinez 2013   | Fluticasone furoate 100 mcg or 200 mcg/vilanterol 25 mcg daily                                                                          | Vilanterol 25 mcg                            | Czech Republic, Germany, Japan, Poland, Romania, Russian Federation, Ukraine and the United States                                                                   | 6                            | Follow-up duration | 61.4   | Mean        | 3                                   | 2                              | 409                             | 203                        |
|                                  |                 |                                                                                                                                         |                                              |                                                                                                                                                                      |                              |                    |        |             |                                     |                                |                                 |                            |
| Review author, year, estimate ID | Trials          | Intervention: specific drugs and dosing                                                                                                 | Comparator: specific drugs and dosing        | Country                                                                                                                                                              | Length of follow-up (months) | Follow-up measure  | Age    | Age measure | Number of intervention group events | Number of control group events | Number of intervention patients | Number of control patients |
| Baumeister, 2011 593             | MIND-IT 2007    | Mirtazapine (30 to 45 mg/day, patients that did not respond and patients with relapse were offered open treatment with citalopram)      | Placebo                                      | Netherlands                                                                                                                                                          | 5.58                         | Follow-up duration | 57.229 | Mean        | 8                                   | 10                             | 47                              | 44                         |
|                                  | SADHART 2002    | Sertraline 50 mg/d for the first 6 weeks, up to 100 mg/d for weeks 6-10, up to 150 mg/d for weeks 10-12, up to 200 mg/d for weeks 12-24 | Placebo                                      | USA, Europe, Canada, Australia                                                                                                                                       | 5.58                         | Follow-up duration | 57.197 | Mean        | 55                                  | 76                             | 186                             | 183                        |

|                                  | Strik 2000    | Fluoxetine (acute treatment period of 9 weeks, and continuation period of 16 weeks; 20 to 60 mg/d)                                                                                                       | Placebo                                                                                                                                                  | Netherlands                                                                                | 5.8                          | Follow-up duration | 56.4   | Mean        | 1                                   | 6                              | 27                              | 27                         |
|----------------------------------|---------------|----------------------------------------------------------------------------------------------------------------------------------------------------------------------------------------------------------|----------------------------------------------------------------------------------------------------------------------------------------------------------|--------------------------------------------------------------------------------------------|------------------------------|--------------------|--------|-------------|-------------------------------------|--------------------------------|---------------------------------|----------------------------|
|                                  |               |                                                                                                                                                                                                          |                                                                                                                                                          |                                                                                            |                              |                    |        |             |                                     |                                |                                 |                            |
| Review author, year, estimate ID | Trials        | Intervention: specific drugs and dosing                                                                                                                                                                  | Comparator: specific drugs and dosing                                                                                                                    | Country                                                                                    | Length of follow-up (months) | Follow-up measure  | Age    | Age measure | Number of intervention group events | Number of control group events | Number of intervention patients | Number of control patients |
| Campschroer, 2014 1164           | Autorino 2005 | Tamsulosin: 0.4 mg once/day and standard therapy (Diclofenac: 100 mg/d)                                                                                                                                  | Standard therapy (Aescin (an anti-oedema extract of the horse chestnut tree): 80 mg/day and Diclofenac: 100 mg/day)                                      | Italy                                                                                      | 0.46                         | Follow-up duration | 45.438 | Mean        | 5                                   | 11                             | 50                              | 46                         |
|                                  | Erturhan 2007 | Tamsulosin 0.4 mg/day plus prophylactic antibiotic therapy (cefuroxime axetil 250mg (OD) and 2500ml hydration daily)                                                                                     | Prophylactic antibiotic therapy (cefuroxime axetil 250mg OD and 2500ml hydration)                                                                        | Turkey                                                                                     | 0.7                          | Follow-up duration | 32.05  | Mean        | 1                                   | 2                              | 30                              | 30                         |
|                                  | Yencilek 2010 | Tamsulosin: 0.4 mg once/day and standard care (Hyoscine-N-butylbromide: 10 mg 3 times/day)                                                                                                               | Standard therapy (Hyoscine-N-butylbromide: 10 mg 3 times/day)                                                                                            | Turkey                                                                                     | 0.93                         | Follow-up duration | 34.139 | Mean        | 14                                  | 26                             | 42                              | 50                         |
|                                  | Zehri 2010    | Doxazosin: 2 mg 1 hour before sleep for a maximum of 28 days and standard therapy (Both groups received 50 mg diclofenac twice/d for a maximum of 10 days and were allowed to drink 2 L of fluids daily) | No treatment and standard therapy (Both groups received 50 mg diclofenac twice/d for a maximum of 10 days and were allowed to drink 2 L of fluids daily) | Pakistan                                                                                   | 0.93                         | Follow-up duration | 33.092 | Mean        | 1                                   | 20                             | 33                              | 32                         |
|                                  |               |                                                                                                                                                                                                          |                                                                                                                                                          |                                                                                            |                              |                    |        |             |                                     |                                |                                 |                            |
| Review author, year, estimate ID | Trials        | Intervention: specific drugs and dosing                                                                                                                                                                  | Comparator: specific drugs and dosing                                                                                                                    | Country                                                                                    | Length of follow-up (months) | Follow-up measure  | Age    | Age measure | Number of intervention group events | Number of control group events | Number of intervention patients | Number of control patients |
| Chong, 2012 1438a                | Briggs 2005   | iotropium, 18 µg once daily via the HandiHaler device                                                                                                                                                    | Salmeterol, 2 actuations of 25 µg each, twice daily via a metered dose inhaler                                                                           | Finland, Greece, Italy, Portugal, Sweden, Turkey, the United Kingdom and the United States | 3                            | Follow-up duration | 64.399 | Mean        | 4                                   | 9                              | 328                             | 325                        |



| Review author, year, estimate ID | Trials                 | Intervention: specific drugs and dosing                                                    | Comparator: specific drugs and dosing | Country | Length of follow-up (months) | Follow-up measure  | Age  | Age measure | Number of intervention group events | Number of control group events | Number of intervention patients | Number of control patients |
|----------------------------------|------------------------|--------------------------------------------------------------------------------------------|---------------------------------------|---------|------------------------------|--------------------|------|-------------|-------------------------------------|--------------------------------|---------------------------------|----------------------------|
| Heran, 2012 3275e                | CHARM-Preserved 2003   | Candesartan, target dose 32 mg once daily                                                  | Placebo                               | Unclear | 36.6                         | Median             | 67.2 | Mean        | 682                                 | 643                            | 1514                            | 1509                       |
|                                  | I-PRESERVE 2008        | Irbesartan, target dose 300 mg once daily                                                  | Placebo                               | Unclear | 49.5                         | Follow-up duration | 72   | Mean        | 827                                 | 790                            | 2067                            | 2061                       |
|                                  | SPICE 2000             | Candesartan, target dose 16 mg once daily                                                  | Placebo                               | Unclear | 2.79                         | Follow-up duration | 65.7 | Mean        | 8                                   | 6                              | 179                             | 91                         |
|                                  | CHARM-Alternative 2003 | Candesartan, target dose 32 mg once daily                                                  | Placebo                               | Unclear | 33.7                         | Median             | 68.3 | Mean        | 403                                 | 357                            | 1013                            | 1015                       |
|                                  |                        |                                                                                            |                                       |         |                              |                    |      |             |                                     |                                |                                 |                            |
| Review author, year, estimate ID | Trials                 | Intervention: specific drugs and dosing                                                    | Comparator: specific drugs and dosing | Country | Length of follow-up (months) | Follow-up measure  | Age  | Age measure | Number of intervention group events | Number of control group events | Number of intervention patients | Number of control patients |
| Heran, 2012 3275l                | Tonkon 2000            | Irbesartan, target dose 150 mg once daily                                                  | Placebo                               | USA     | 2.79                         | Follow-up duration | 63.9 | Mean        | 2                                   | 1                              | 57                              | 52                         |
|                                  | RESOLVD 1999           | Candesartan 4 or 8 mg OD plus enalapril 10 mg twice daily                                  | Enalapril 10 mg twice daily           | Unclear | 10                           | Follow-up duration | 63.1 | Mean        | 31                                  | 7                              | 332                             | 109                        |
|                                  | CHARM-Added 2003       | Candesartan, target dose 32 mg once daily                                                  | Placebo                               | Unclear | 36                           | Mean               | 64.1 | Mean        | 309                                 | 356                            | 1276                            | 1272                       |
|                                  | Val-HeFT 2001          | Valsartan 160 mg twice daily                                                               | Placebo                               | Unclear | 23                           | Follow-up duration | 62.7 | Mean        | 346                                 | 455                            | 2511                            | 2499                       |
|                                  |                        |                                                                                            |                                       |         |                              |                    |      |             |                                     |                                |                                 |                            |
| Review author, year, estimate ID | Trials                 | Intervention: specific drugs and dosing                                                    | Comparator: specific drugs and dosing | Country | Length of follow-up (months) | Follow-up measure  | Age  | Age measure | Number of intervention group events | Number of control group events | Number of intervention patients | Number of control patients |
| Hood, 2014 3415                  | Dig captopril 1988     | Digoxin 0.125 to 0.375 mg/d titrated to serum levels of 0.7 to 2.5 ng/mL                   | placebo                               | Unclear | 6                            | Follow-up duration | 58   | Mean        | 3                                   | 11                             | 96                              | 100                        |
|                                  | DIG study 1997         | Digoxin median baseline dosage in main trial of 0.25 mg/d                                  | placebo                               | Unclear | 37                           | Mean               | 63   | Mean        | 910                                 | 1180                           | 3397                            | 3403                       |
|                                  | PROVED 1993            | Digoxin dosage titrated to mean serum level of 1.2 ng/mL, median digoxin dosage 0.375 mg/d | placebo                               | Unclear | 3                            | Follow-up duration | 64   | Mean        | 3                                   | 6                              | 42                              | 46                         |

|                                  | RADIANCE 1993      | Digoxin dosage titrated to mean serum level of 1.2 ng/mL, mean dig dosage 0.38 mg/d                                                                                                                                                                                                | Placebo                                                                                                                                                                                                                                                                              | Unclear  | 3                          | Study duration, mean/median follow-up not reported | 60      | Mean        | 2                                   | 9                              | 85                              | 93                         |
|----------------------------------|--------------------|------------------------------------------------------------------------------------------------------------------------------------------------------------------------------------------------------------------------------------------------------------------------------------|--------------------------------------------------------------------------------------------------------------------------------------------------------------------------------------------------------------------------------------------------------------------------------------|----------|----------------------------|----------------------------------------------------|---------|-------------|-------------------------------------|--------------------------------|---------------------------------|----------------------------|
|                                  |                    |                                                                                                                                                                                                                                                                                    |                                                                                                                                                                                                                                                                                      |          |                            |                                                    |         |             |                                     |                                |                                 |                            |
| Review author, year, estimate ID | Trials             | Intervention: specific drugs and dosing                                                                                                                                                                                                                                            | Comparator: specific drugs and dosing                                                                                                                                                                                                                                                | Country  | Length of follow-up (days) | Follow-up measure                                  | Age     | Age measure | Number of intervention group events | Number of control group events | Number of intervention patients | Number of control patients |
| Kew, 2014 4002a                  | Bilaceroglu 2001   | IV MgSO4 group: Group 1 given salbutamol + 2 mg IV MgSO4 in 100 cc dextrose solution. Group 2 given salbutamol (2.5 mg nebulised) + corticosteroid (125 mg prednisolone) + 2 mg MgSO4 in 100 cc dextrose solution. Both groups given treatment at the 30th minute of their arrival | Group 1 given salbutamol + placebo (100 cc of 5% dextrose solution). Group 2 given salbutamol (2.5 mg nebulised) + corticosteroid (125 mg prednisolone) + placebo (100 cc of 5% dextrose solution). In both groups, these were given at the 30th minute of the participant's arrival | Turkey   | 0.25                       | Follow-up duration                                 | Unclear | Unclear     | 10                                  | 17                             | 40                              | 41                         |
|                                  | Bloch 1995         | 2 g intravenous magnesium sulfate in 50 mL 0.9% normal saline given 30 minutes after entry and infused over 20 minutes                                                                                                                                                             | 50 mL of 0.9% normal saline given 30 minutes after entry and infused over 20 minutes                                                                                                                                                                                                 | USA      | 0.0054825                  | Follow-up duration                                 | Unclear | Unclear     | 17                                  | 24                             | 67                              | 68                         |
|                                  | Boonyavorakul 2000 | 2 g of magnesium sulfate in 50 mL 0.9% normal saline                                                                                                                                                                                                                               | 2 mL of sterile water in 50 mL 0.9% normal saline                                                                                                                                                                                                                                    | Thailand | 0.0054825                  | Follow-up duration                                 | Unclear | Unclear     | 3                                   | 4                              | 17                              | 16                         |
|                                  | Bradshaw 2007      | 1.2 g intravenous magnesium sulfate in 50 mL 0.9% normal saline infused over 15 minutes                                                                                                                                                                                            | 50 mL 0.9% normal saline infused over 15 minutes                                                                                                                                                                                                                                     | Scotland | 0.0013706                  | Follow-up duration                                 | Unclear | Unclear     | 49                                  | 52                             | 62                              | 67                         |
|                                  | Goodacre 2013      | 2 g magnesium sulfate in 100 mL 0.9% normal saline infused over 20 minutes                                                                                                                                                                                                         | 100 mL 0.9% normal saline infused over 20 minutes                                                                                                                                                                                                                                    | UK       | 0.0054825                  | Follow-up duration                                 | Unclear | Unclear     | 279                                 | 278                            | 394                             | 358                        |
|                                  | Green 1992         | IV MgSO4 Group: 2 g IV MgSO4 in 50 mL D5W over 20 minutes within 45 minutes of treatment initiation                                                                                                                                                                                | Control group: no IV MgSO4 given                                                                                                                                                                                                                                                     | USA      | Unclear                    |                                                    | Unclear | Unclear     | 13                                  | 11                             | 58                              | 62                         |



|                                  |                    |                                                                                                                                                                                                                                                                                                             |                                                                                       |          |                            |                    |         |             |                                     |                                |                                 |                            |
|----------------------------------|--------------------|-------------------------------------------------------------------------------------------------------------------------------------------------------------------------------------------------------------------------------------------------------------------------------------------------------------|---------------------------------------------------------------------------------------|----------|----------------------------|--------------------|---------|-------------|-------------------------------------|--------------------------------|---------------------------------|----------------------------|
|                                  | Matusiewicz 1994   | IV MgSO4 group: 1.2 mg IV MgSO4 in 50 mL 0.9% normal saline infused over 15 minutes<br>Co-interventions: All participants received 5 mg nebulised salbutamol, 500 mcg nebulised ipratropium bromide, oxygen, 200 mg IV hydrocortisone. Aminophylline was given at the discretion of the attending physician | Control group: 50 mL 0.9% normal saline infused over 15 minutes                       | Scotland | Unclear                    |                    | Unclear | Unclear     | 45                                  | 47                             | 64                              | 67                         |
|                                  | Porter 2001        | 2 g magnesium sulfate in 50 mL 0.9% normal saline given immediately                                                                                                                                                                                                                                         | 50 mL 0.9% normal saline given immediately                                            | USA      | 0.0013706                  | Follow-up duration | Unclear | Unclear     | 5                                   | 5                              | 18                              | 24                         |
|                                  | Silverman 2002     | 2 g intravenous magnesium sulfate in 50 mL 0.9% normal saline infused over 10 to 15 minutes and given at 30 minutes                                                                                                                                                                                         | 50 mL 'like appearing solution' infused over 10 to 15 minutes and given at 30 minutes | USA      | 0.0054825                  | Follow-up duration | Unclear | Unclear     | 39                                  | 41                             | 122                             | 126                        |
|                                  | Singh 2008         | 2 g intravenous magnesium sulfate in 250 mL 0.9% normal saline infused over 20 minutes at 30 minutes                                                                                                                                                                                                        | 250 mL 0.9% normal saline infused over 20 minutes at 30 minutes                       | India    | 0.0041118                  | Follow-up duration | Unclear | Unclear     | 2                                   | 9                              | 30                              | 30                         |
|                                  | Skobeloff 1989     | 1.2 g intravenous magnesium sulfate in 50 mL of 0.9% normal saline infused over 20 minutes                                                                                                                                                                                                                  | 50 mL 0.9% normal saline infused over 20 minutes                                      | USA      | 0.0054825                  | Follow-up duration | Unclear | Unclear     | 7                                   | 15                             | 19                              | 19                         |
|                                  |                    |                                                                                                                                                                                                                                                                                                             |                                                                                       |          |                            |                    |         |             |                                     |                                |                                 |                            |
| Review author, year, estimate ID | Trials             | Intervention: specific drugs and dosing                                                                                                                                                                                                                                                                     | Comparator: specific drugs and dosing                                                 | Country  | Length of follow-up (days) | Follow-up measure  | Age     | Age measure | Number of intervention group events | Number of control group events | Number of intervention patients | Number of control patients |
| Kew, 2014 4002h                  | Bloch 1995 (2)     | 2 g intravenous magnesium sulfate in 50 mL 0.9% normal saline given 30 minutes after entry and infused over 20 minutes                                                                                                                                                                                      | 50 mL of 0.9% normal saline given 30 minutes after entry and infused over 20 minutes  | USA      | 0.0054825                  | Follow-up duration | Unclear | Unclear     | 17                                  | 24                             | 67                              | 68                         |
|                                  | Boonyavorakul 2000 | 2 g of magnesium sulfate in 50 mL 0.9% normal saline                                                                                                                                                                                                                                                        | 2 mL of sterile water in 50 mL 0.9% normal saline                                     | Thailand | 0.0054825                  | Follow-up duration | Unclear | Unclear     | 3                                   | 4                              | 17                              | 16                         |
|                                  | Bradshaw 2007 (3)  | 1.2 g intravenous magnesium sulfate in 50 mL 0.9% normal saline infused over 15 minutes                                                                                                                                                                                                                     | 50 mL 0.9% normal saline infused over 15 minutes                                      | Scotland | 0.0013706                  | Follow-up duration | Unclear | Unclear     | 49                                  | 52                             | 62                              | 67                         |

|                                  | Goodacre 2013   | 2 g magnesium sulfate in 100 mL 0.9% normal saline infused over 20 minutes                                          | 100 mL 0.9% normal saline infused over 20 minutes                                     | UK                                                                                                                           | 0.0054825                    | Follow-up duration | Unclear | Unclear     | 279                                 | 278                            | 394                             | 358                        |
|----------------------------------|-----------------|---------------------------------------------------------------------------------------------------------------------|---------------------------------------------------------------------------------------|------------------------------------------------------------------------------------------------------------------------------|------------------------------|--------------------|---------|-------------|-------------------------------------|--------------------------------|---------------------------------|----------------------------|
|                                  | Porter 2001     | 2 g magnesium sulfate in 50 mL 0.9% normal saline given immediately                                                 | 50 mL 0.9% normal saline given immediately                                            | USA                                                                                                                          | 0.0013706                    | Follow-up duration | Unclear | Unclear     | 5                                   | 5                              | 18                              | 24                         |
|                                  | Silverman 2002  | 2 g intravenous magnesium sulfate in 50 mL 0.9% normal saline infused over 10 to 15 minutes and given at 30 minutes | 50 mL 'like appearing solution' infused over 10 to 15 minutes and given at 30 minutes | USA                                                                                                                          | 0.0054825                    | Follow-up duration | Unclear | Unclear     | 39                                  | 41                             | 122                             | 126                        |
|                                  | Singh 2008      | 2 g intravenous magnesium sulfate in 250 mL 0.9% normal saline infused over 20 minutes at 30 minutes                | 250 mL 0.9% normal saline infused over 20 minutes at 30 minutes                       | India                                                                                                                        | 0.0041118                    | Follow-up duration | Unclear | Unclear     | 2                                   | 9                              | 30                              | 30                         |
|                                  | Skobeloff 1989  | 1.2 g intravenous magnesium sulfate in 50 mL of 0.9% normal saline infused over 20 minutes                          | 50 mL 0.9% normal saline infused over 20 minutes                                      | USA                                                                                                                          | 0.0054825                    | Follow-up duration | Unclear | Unclear     | 7                                   | 15                             | 19                              | 19                         |
|                                  |                 |                                                                                                                     |                                                                                       |                                                                                                                              |                              |                    |         |             |                                     |                                |                                 |                            |
| Review author, year, estimate ID | Trials          | Intervention: specific drugs and dosing                                                                             | Comparator: specific drugs and dosing                                                 | Country                                                                                                                      | Length of follow-up (months) | Follow-up measure  | Age     | Age measure | Number of intervention group events | Number of control group events | Number of intervention patients | Number of control patients |
| Kew, 2013 4003a                  | Vogelmeier 2008 | Formoterol 10 µg twice daily                                                                                        | Placebo                                                                               | Germany (30), Italy (19), Netherlands (9), Russian Federation (9), Poland (7), Czech Republic (4), Spain (4) and Hungary (4) | 6                            | Follow-up duration | 62.149  | Mean        | 1                                   | 3                              | 210                             | 209                        |
|                                  | Doherty 2012    | Formoterol 10 µg twice daily                                                                                        | Placebo                                                                               | North, Central and South America, Europe, Africa and Asia                                                                    | 6                            | Follow-up duration | 59.257  | Mean        | 5                                   | 12                             | 243                             | 236                        |
|                                  | Dahl 2001       | Formoterol 12 µg twice daily                                                                                        | Placebo                                                                               | Denmark, Netherlands, Poland, Russia, UK                                                                                     | 12                           | Follow-up duration | 63.678  | Mean        | 2                                   | 2                              | 181                             | 86                         |
|                                  | Rossi 2002      | Formoterol 12 µg twice daily                                                                                        | Placebo                                                                               | 81 centres worldwide                                                                                                         | 12                           | Follow-up duration | 63      | Mean        | 10                                  | 10                             | 211                             | 110                        |

|                                  | Tashkin 2012    | Formoterol 10 µg twice daily            | Placebo                               | South America, Asia, Africa, Europe and North America                                                                        | 6                            | Follow-up duration | 59.197 | Mean        | 6                                   | 7                              | 209                             | 212                        |
|----------------------------------|-----------------|-----------------------------------------|---------------------------------------|------------------------------------------------------------------------------------------------------------------------------|------------------------------|--------------------|--------|-------------|-------------------------------------|--------------------------------|---------------------------------|----------------------------|
|                                  | Calverley 2003a | Formoterol 12 µg twice daily            | Placebo                               | 15 countries or regions                                                                                                      | 12                           | Follow-up duration | 64.002 | Mean        | 73                                  | 79                             | 255                             | 256                        |
|                                  | Rossi 2002      | Formoterol 24 µg twice daily            | Placebo                               | 81 centres worldwide                                                                                                         | 12                           | Follow-up duration | 62.34  | Mean        | 5                                   | 10                             | 214                             | 110                        |
|                                  | Dahl 2001       | Formoterol 24 µg twice daily            | Placebo                               | Denmark, Netherlands, Poland, Russia, UK                                                                                     | 12                           | Follow-up duration | 63.665 | Mean        | 2                                   | 2                              | 171                             | 86                         |
|                                  | Brusasco 2003   | Salmeterol 50 µg twice daily            | Placebo                               | 18 countries                                                                                                                 | 6                            | Follow-up duration | 64.348 | Mean        | 20                                  | 20                             | 405                             | 400                        |
|                                  |                 |                                         |                                       |                                                                                                                              |                              |                    |        |             |                                     |                                |                                 |                            |
| Review author, year, estimate ID | Trials          | Intervention: specific drugs and dosing | Comparator: specific drugs and dosing | Country                                                                                                                      | Length of follow-up (months) | Follow-up measure  | Age    | Age measure | Number of intervention group events | Number of control group events | Number of intervention patients | Number of control patients |
| Kew, 2013 4003e                  | Dahl 2001       | Formoterol 12 µg twice daily            | Placebo                               | Denmark, Netherlands, Poland, Russia, UK                                                                                     | 6                            | Follow-up duration | 63.843 | Mean        | 2                                   | 4                              | 181                             | 172                        |
|                                  | Vogelmeier 2008 | Formoterol 10 µg twice daily            | Placebo                               | Germany (30), Italy (19), Netherlands (9), Russian Federation (9), Poland (7), Czech Republic (4), Spain (4) and Hungary (4) | 6                            | Follow-up duration | 62.149 | Mean        | 1                                   | 3                              | 210                             | 209                        |
|                                  | Tashkin 2012    | Formoterol 10 µg twice daily            | Placebo                               | South America, Asia, Africa, Europe and North America                                                                        | 6                            | Follow-up duration | 59.197 | Mean        | 6                                   | 7                              | 209                             | 212                        |
|                                  | Doherty 2012    | Formoterol 10 µg twice daily            | Placebo                               | North, Central and South America, Europe, Africa and Asia                                                                    | 6                            | Follow-up duration | 59.257 | Mean        | 5                                   | 12                             | 243                             | 236                        |
|                                  | Rossi 2002      | Formoterol 12 µg twice daily            | Placebo                               | 81 centres worldwide                                                                                                         | 12                           | Follow-up duration | 63     | Mean        | 10                                  | 20                             | 211                             | 220                        |

|                                  | Calverley 2003a | Formoterol 12 µg twice daily                                                                         | Placebo                                                                                       | 15 countries or regions | 12                           | Follow-up duration | 64.002 | Mean        | 73                                  | 79                             | 255                             | 256                        |
|----------------------------------|-----------------|------------------------------------------------------------------------------------------------------|-----------------------------------------------------------------------------------------------|-------------------------|------------------------------|--------------------|--------|-------------|-------------------------------------|--------------------------------|---------------------------------|----------------------------|
|                                  |                 |                                                                                                      |                                                                                               |                         |                              |                    |        |             |                                     |                                |                                 |                            |
| Review author, year, estimate ID | Trials          | Intervention: specific drugs and dosing                                                              | Comparator: specific drugs and dosing                                                         | Country                 | Length of follow-up (months) | Follow-up measure  | Age    | Age measure | Number of intervention group events | Number of control group events | Number of intervention patients | Number of control patients |
| Komossa, 2013 4123b              | Stroup 2006     | Olanzapine: flexible dose, allowed dose range: 7.5-30 mg/day, mean dose=20.5 mg/day. N=108.;         | Quetiapine: flexible dose, allowed dose range: 200-800 mg/day, mean dose=565.2 mg/day. N=95.  | USA                     | 6.5                          | Follow-up duration | 40.047 | Mean        | 12                                  | 19                             | 108                             | 95                         |
|                                  | Lieberman 2005  | Olanzapine: flexible dose, allowed dose range: 7.5-30 mg/day, mean dose=20.1 mg/day. N=336.          | Quetiapine: flexible dose, allowed dose range: 200-800 mg/day, mean dose=543.4 mg/day. N=337. | USA                     | 19.5                         | Follow-up duration | 40.6   | Mean        | 38                                  | 68                             | 336                             | 337                        |
|                                  |                 |                                                                                                      |                                                                                               |                         |                              |                    |        |             |                                     |                                |                                 |                            |
| Review author, year, estimate ID | Trials          | Intervention: specific drugs and dosing                                                              | Comparator: specific drugs and dosing                                                         | Country                 | Length of follow-up (months) | Follow-up measure  | Age    | Age measure | Number of intervention group events | Number of control group events | Number of intervention patients | Number of control patients |
| Komossa, 2013 4123i              | Stroup 2006     | Olanzapine: flexible dose, allowed dose range: 7.5-30 mg/day, mean dose=20.5 mg/day. N=108.;         | Ziprasidone: flexible dose, allowed dose range: 40-160 mg/day, mean dose=115.9 mg/day. N=137  | USA                     | 6.5                          | Follow-up duration | 40.727 | Mean        | 12                                  | 22                             | 108                             | 137                        |
|                                  | Lieberman 2005  | Olanzapine: flexible dose, allowed dose range: 7.5-30 mg/day, mean dose=20.1 mg/day. N=336           | Ziprasidone: flexible dose, allowed dose range: 40-160 mg/day, mean dose=112.8 mg/day. N=185  | USA                     | 19.5                         | Follow-up duration | 40.6   | Mean        | 38                                  | 33                             | 336                             | 185                        |
|                                  |                 |                                                                                                      |                                                                                               |                         |                              |                    |        |             |                                     |                                |                                 |                            |
| Review author, year, estimate ID | Trials          | Intervention: specific drugs and dosing                                                              | Comparator: specific drugs and dosing                                                         | Country                 | Length of follow-up (months) | Follow-up measure  | Age    | Age measure | Number of intervention group events | Number of control group events | Number of intervention patients | Number of control patients |
| Leucht, 2012 4508a               | Goldberg 1981   | fluphenazine decanoate-Fixed doses. Allowed dose range: n.i. - same dose as before. Mean dose: n.i.. | Placebo (all on depot)                                                                        | Unclear                 | 1.5                          | Follow-up duration | 37     | Mean        | 0                                   | 0                              | 14                              | 17                         |

|                |                                                                                                                                                                          |         |           |     |                    |       |         |   |    |     |     |
|----------------|--------------------------------------------------------------------------------------------------------------------------------------------------------------------------|---------|-----------|-----|--------------------|-------|---------|---|----|-----|-----|
| Keskiner 1968  | fluphenazine decanoate - Flexible doses. Allowed dose range: 12.5-75/mg biweekly. Mean dose: n.i..                                                                       | Placebo | Unclear   | 3   | Follow-up duration | 36    | Mean    | 1 | 2  | 13  | 11  |
| Blackburn 1981 | prochlorpromazine, perphenazine, chlorpromazine, promazine or trifluoperazine. Fixed doses continued with the same drug and dose taken before the study. Mean dose: n.i. | Placebo | Unclear   | 4   | Follow-up duration | 20-40 | Range   | 0 | 9  | 30  | 15  |
| Ruskin 1991    | haloperidol. Fixed dose (dose before randomisation was maintained). Mean dose: n.i..                                                                                     | Placebo | Unclear   | 6   | Follow-up duration | 60.1  | Mean    | 0 | 1  | 11  | 12  |
| Wistedt 1981   | fluphenazine depot (most around 12.5 - 25 mg/3 weeks, mean 21.42mg/3 weeks) or flupenthixol depot (most around 20-40mg/3 weeks, mean 27.5/3 weeks) - Fixed dose.         | Placebo | Unclear   | 6.5 | Follow-up duration | 43.1  | Mean    | 0 | 5  | 24  | 17  |
| Beasley 2003   | olanzapine - Fixed dose of either 10, 15 or 20 mg/day. Mean dose 13.4 mg/day.                                                                                            | Placebo | Unclear   | 7.5 | Follow-up duration | 35.9  | Mean    | 2 | 15 | 224 | 102 |
| Chen 2010      | quetiapine. Fixed dose of 400mg/day.                                                                                                                                     | Placebo | Hong Kong | 12  | Follow-up duration | 24.2  | Unclear | 5 | 14 | 89  | 89  |
| Hirsch 1973    | Fixed/flexible dose: Allowed dose range: 25mg/month - no upper limit. Mean dose: 26.4mg/month.                                                                           | Placebo | Unclear   | 9   | Follow-up duration | 43.4  | Mean    | 8 | 24 | 41  | 40  |
| Hough 2010     | paliperidone palmitate depot - Fixed dose: originally 25, 50 or 100mg/4 weeks; this dose was maintained. Mean dose: n.i..                                                | Placebo | Unclear   | 12  | Follow-up duration | 39    | Mean    | 3 | 7  | 206 | 204 |
| Kramer 2007    | paliperidone- Flexible doses. Allowed dose range: 3 - 15mg/day Mean dose: 10.8 mg/day.                                                                                   | Placebo | Unclear   | 12  | Follow-up duration | 38.3  | Mean    | 6 | 13 | 105 | 102 |



| Review author, year, estimate ID | Trials            | Intervention: specific drugs and dosing                                             | Comparator: specific drugs and dosing | Country   | Length of follow-up (months)                     | Follow-up measure  | Age     | Age measure | Number of intervention group events | Number of control group events | Number of intervention patients | Number of control patients |
|----------------------------------|-------------------|-------------------------------------------------------------------------------------|---------------------------------------|-----------|--------------------------------------------------|--------------------|---------|-------------|-------------------------------------|--------------------------------|---------------------------------|----------------------------|
| Magee, 2012 4812a                | Fr Caribbean 1990 | Oxprenolol 80 mg po twice daily (max 320 mg daily)                                  | Placebo                               | Caribbean | 20-36 weeks' gestation until babies birth        | Range              | Unclear | Unclear     | 48                                  | 46                             | 78                              | 76                         |
|                                  | Scotland 1983     | Labetalol 100 mg po twice daily (max 1200 mg daily)                                 | Placebo                               | Scotland  | Unclear                                          | Unclear            | Unclear | Unclear     | 16                                  | 33                             | 46                              | 39                         |
|                                  | Sweden 1984       | Metoprolol 50 mg po twice daily (max 200 mg daily)                                  | Placebo 1 table po twice daily        | Sweden    | Less than 37 weeks' gestation until babies birth | Range              | Unclear | Unclear     | 16                                  | 19                             | 26                              | 26                         |
|                                  |                   |                                                                                     |                                       |           |                                                  |                    |         |             |                                     |                                |                                 |                            |
| Review author, year, estimate ID | Trials            | Intervention: specific drugs and dosing                                             | Comparator: specific drugs and dosing | Country   | Length of follow-up (months)                     | Follow-up measure  | Age     | Age measure | Number of intervention group events | Number of control group events | Number of intervention patients | Number of control patients |
| Makrides, 2014 4844              | Austria 1997      | oral magnesium citrate supplements (365 mg (15 mmol) once daily)                    | placebo                               | Austria   | Unclear                                          | Unclear            | Unclear | Unclear     | 16                                  | 30                             | 240                             | 250                        |
|                                  | Italy 1994        | 15 mmol magnesium hydrochlorate aspartate                                           | placebo                               | Italy     | Unclear                                          | Unclear            | Unclear | Unclear     | 2                                   | 5                              | 50                              | 50                         |
|                                  | Zurich 1988       | 15mmol of magnesium aspartate-hydrochloride daily                                   | placebo                               | Zurich    | Unclear                                          | Unclear            | Unclear | Unclear     | 44                                  | 65                             | 278                             | 290                        |
|                                  |                   |                                                                                     |                                       |           |                                                  |                    |         |             |                                     |                                |                                 |                            |
| Review author, year, estimate ID | Trials            | Intervention: specific drugs and dosing                                             | Comparator: specific drugs and dosing | Country   | Length of follow-up (months)                     | Follow-up measure  | Age     | Age measure | Number of intervention group events | Number of control group events | Number of intervention patients | Number of control patients |
| Ngo, 2010 5606                   | Cleland 2005      | Treatment: darbepoetin alfa, 2.0, 3.0 or 5.0µg/kg every month (no target)           | Placebo                               | Unclear   | 2                                                | Follow-up duration | 72.5    | Mean        | 3                                   | 0                              | 18                              | 6                          |
|                                  | Ghali 2008        | darbepoetin alfa, starting dose 0.75µg/kg, every 2 weeks to target Hb of 13-15g/dL  | Placebo                               | Unclear   | 13                                               | Follow-up duration | 68.492  | Mean        | 25                                  | 31                             | 162                             | 157                        |
|                                  | Kourea 2008a      | darbepoetin alfa, starting dose 1.5µg/kg, every 20 days to target Hb of 12.5-14g/dL | Placebo                               | Unclear   | 3                                                | Follow-up duration | 69.098  | Mean        | 3                                   | 5                              | 21                              | 20                         |

|                                  |                     |                                                                                            |                                       |                               |                              |                    |                    |             |                                     |                                |                                 |                            |
|----------------------------------|---------------------|--------------------------------------------------------------------------------------------|---------------------------------------|-------------------------------|------------------------------|--------------------|--------------------|-------------|-------------------------------------|--------------------------------|---------------------------------|----------------------------|
|                                  | Mancini 2003        | erythropoietin, 5000U thrice-weekly to target Hct of 45% and folate 1mg orally daily       | Placebo                               | Unclear                       | 3                            | Follow-up duration | 78.652             | Mean        | 1                                   | 4                              | 15                              | 8                          |
|                                  | Palazzuoli 2006     | beta-EPO, 6000IU twice-weekly to target Hb of 11.5-12g/dL                                  | Placebo                               | Unclear                       | 12                           | Follow-up duration | 73.421             | Mean        | 4                                   | 8                              | 20                              | 18                         |
|                                  | Palazzuoli 2007     | beta-EPO, 6000IU twice-weekly to target Hb of 12-12.5g/dL                                  | Placebo                               | Unclear                       | 12                           | Follow-up duration | 73.02              | Mean        | 4                                   | 8                              | 26                              | 25                         |
|                                  | Parissis 2008       | darbepoetin alfa, 1.5mg/kg every 20 days to target Hb of 14g/dL                            | Placebo                               | Unclear                       | 3                            | Follow-up duration | 70.969             | Mean        | 2                                   | 3                              | 21                              | 11                         |
|                                  | Ponikowski 2007     | darbepoetin alfa, 0.75mg/kg every 2 weeks to target Hb of 13-15g/dL                        | Placebo                               | Unclear                       | 6.5                          | Follow-up duration | 71.073             | Mean        | 2                                   | 3                              | 19                              | 22                         |
|                                  | van Veldhuisen 2007 | darbepoetin alfa, starting dose 0.75µg/kg or 50µg, every 2 weeks to target Hb of 13-15g/dL | Placebo                               | Unclear                       | 6.5                          | Follow-up duration | 71                 | Mean        | 4                                   | 4                              | 110                             | 55                         |
|                                  |                     |                                                                                            |                                       |                               |                              |                    |                    |             |                                     |                                |                                 |                            |
| Review author, year, estimate ID | Trials              | Intervention: specific drugs and dosing                                                    | Comparator: specific drugs and dosing | Country                       | Length of follow-up (months) | Follow-up measure  | Age                | Age measure | Number of intervention group events | Number of control group events | Number of intervention patients | Number of control patients |
| Renner, 2012 6442a               | Romieu 2007         | granulocyte colony-stimulating factors: pegfilgrastim, 6 mg/day; d2 sc                     | No treatment in cycle 1               | Germany, Spain, Italy, France | 16                           | Follow-up duration | 65 to 77           | Range       | 0                                   | 3                              | 30                              | 29                         |
|                                  | Vogel 2005          | granulocyte colony-stimulating factors: pegfilgrastim, 6 mg/day; d2 sc                     | identical placebo                     | Europe and the USA            | Unclear                      | Unclear            | 21 to 88 (mean 52) | Range       | 5                                   | 42                             | 463                             | 465                        |
|                                  | Hansen 1995         | granulocyte-macrophage colony-stimulating factors: molgramostim, 5 µg/kg/dday; d2-11 sc    | No treatment                          | Denmark                       | Unclear                      | Unclear            | 37 to 61           | Range       | 0                                   | 1                              | 11                              | 9                          |
|                                  | Jones 1996          | granulocyte-macrophage colony-stimulating factors: sargramostim, 250 µg/m2; d3-15 sc       | Identical placebo                     | USA                           | 21.5                         | Follow-up duration | 25 to 69 (mean 47) | Range       | 1                                   | 4                              | 70                              | 72                         |
|                                  |                     |                                                                                            |                                       |                               |                              |                    |                    |             |                                     |                                |                                 |                            |
| Review author, year, estimate ID | Trials              | Intervention: specific drugs and dosing                                                    | Comparator: specific drugs and dosing | Country                       | Length of follow-up (months) | Follow-up measure  | Age                | Age measure | Number of intervention group events | Number of control group events | Number of intervention patients | Number of control patients |





| Review author, year, estimate ID | Trials        | Intervention: specific drugs and dosing                                                                                                                                                                                        | Comparator: specific drugs and dosing                                                                 | Country                                                       | Length of follow-up (months) | Follow-up measure  | Age    | Age measure | Number of intervention group events | Number of control group events | Number of intervention patients | Number of control patients |
|----------------------------------|---------------|--------------------------------------------------------------------------------------------------------------------------------------------------------------------------------------------------------------------------------|-------------------------------------------------------------------------------------------------------|---------------------------------------------------------------|------------------------------|--------------------|--------|-------------|-------------------------------------|--------------------------------|---------------------------------|----------------------------|
| Salpeter, 2006 6797d             | Brusco 2003   | Salmeterol 50 mcg twice daily                                                                                                                                                                                                  | Tiotropium 18mcg daily                                                                                | Unclear                                                       | 6                            | Follow-up duration | 63.951 | Mean        | 20                                  | 12                             | 405                             | 402                        |
|                                  | Friedman 1999 | Albuterol 240 mcg twice daily                                                                                                                                                                                                  | Ipratropium 42 mcg daily                                                                              | Unclear                                                       | 3                            | Follow-up duration | 64.294 | Mean        | 11                                  | 3                              | 437                             | 362                        |
|                                  |               |                                                                                                                                                                                                                                |                                                                                                       |                                                               |                              |                    |        |             |                                     |                                |                                 |                            |
| Review author, year, estimate ID | Trials        | Intervention: specific drugs and dosing                                                                                                                                                                                        | Comparator: specific drugs and dosing                                                                 | Country                                                       | Length of follow-up (months) | Follow-up measure  | Age    | Age measure | Number of intervention group events | Number of control group events | Number of intervention patients | Number of control patients |
| Cheyne, 2015 8744d               | Voshaar 2008  | tiotropium 5mcg delivered via SPIRIVA Respimat SMI once daily and placebo delivered via pMDI four times daily; tiotropium 10 mcg delivered via SPIRIVA Respimat SMI once daily and placebo delivered via pMDI four times daily | ipratropium bromide 36 mcg, delivered via pMDI four times daily and 2 inhalations of placebo Respimat | Germany, Italy, South Africa and Switzerland, USA, and Canada | 3                            | Follow-up duration | 64.331 | Mean        | 1                                   | 1                              | 180                             | 89                         |
|                                  | Vincken 2002  | iotropium 18 mcg once daily (Spiriva HandiHaler taken between 8 am and 10 am) and ipratropium matched placebo four times daily.                                                                                                | tiotropium matched placebo once daily and ipratropium 40 mcg four times daily                         | Netherlands and Belgium                                       | 12                           | Follow-up duration | 63.901 | Mean        | 26                                  | 21                             | 356                             | 179                        |
|                                  | Voshaar 2008  | tiotropium 5mcg delivered via SPIRIVA Respimat SMI once daily and placebo delivered via pMDI four times daily; tiotropium 10 mcg delivered via SPIRIVA Respimat SMI once daily and placebo delivered via pMDI four times daily | ipratropium bromide 36 mcg, delivered via pMDI four times daily and 2 inhalations of placebo Respimat | Germany, Italy, South Africa and Switzerland, USA, and Canada | 3                            | Follow-up duration | 64.331 | Mean        | 1                                   | 2                              | 180                             | 89                         |
|                                  |               |                                                                                                                                                                                                                                |                                                                                                       |                                                               |                              |                    |        |             |                                     |                                |                                 |                            |
| Review author, year, estimate ID | Trials        | Intervention: specific drugs and dosing                                                                                                                                                                                        | Comparator: specific drugs and dosing                                                                 | Country                                                       | Length of follow-up (months) | Follow-up measure  | Age    | Age measure | Number of intervention group events | Number of control group events | Number of intervention patients | Number of control patients |

|                          |             |                                                                                                                                                                                                                                                                                                                                                                                                                                                                                                                                                                                                                                                                                                                                                                                                                                                                                                                                                                                                                                  |            |         |    |                       |        |      |   |   |    |    |
|--------------------------|-------------|----------------------------------------------------------------------------------------------------------------------------------------------------------------------------------------------------------------------------------------------------------------------------------------------------------------------------------------------------------------------------------------------------------------------------------------------------------------------------------------------------------------------------------------------------------------------------------------------------------------------------------------------------------------------------------------------------------------------------------------------------------------------------------------------------------------------------------------------------------------------------------------------------------------------------------------------------------------------------------------------------------------------------------|------------|---------|----|-----------------------|--------|------|---|---|----|----|
| Fisher,<br>2014<br>8769b | Honold 2012 | <p>Bone marrow stem cells.<br/> Type of stem cells:<br/> endothelial progenitor cells<br/> from bone marrow aspirates.<br/> Summary of stem cell<br/> isolation and type and route<br/> of delivery: G-CSF was<br/> administered to the<br/> participants for 5 days. 270<br/> ml of peripheral blood was<br/> drawn. Mononuclear cells<br/> were isolated using a Ficoll<br/> gradient centrifugation and<br/> cells were resuspended in X-<br/> vivo 15 medium with 1 ng/ml<br/> carrier-free human<br/> recombinant VEGF,<br/> atorvastatin and 20% human<br/> serum drawn from each<br/> individual participant. Cells<br/> were cultured ex vivo for 4<br/> days to enrich in endothelial<br/> progenitor cells (uptake of<br/> LDL). Dose of stem cells: <math>29 \pm 12 \times 10^6</math>. Timing of stem<br/> cell procedure: % days<br/> following G-CSF<br/> administration and 4 days<br/> following bone marrow<br/> aspiration and cell culture G-<br/> CSF details: Yes, 5 days prior<br/> to cell isolation.</p> | No placebo | Germany | 60 | Follow-up<br>duration | 55.036 | Mean | 0 | 2 | 22 | 10 |
|--------------------------|-------------|----------------------------------------------------------------------------------------------------------------------------------------------------------------------------------------------------------------------------------------------------------------------------------------------------------------------------------------------------------------------------------------------------------------------------------------------------------------------------------------------------------------------------------------------------------------------------------------------------------------------------------------------------------------------------------------------------------------------------------------------------------------------------------------------------------------------------------------------------------------------------------------------------------------------------------------------------------------------------------------------------------------------------------|------------|---------|----|-----------------------|--------|------|---|---|----|----|

|                                  |              |                                                                                                                                                                                                                                                                                                                                                                                                                                                                                                                                                                                                                                                                                                                                                                                                                                                                                                                                                                                                                                                                                                |                                                                                                                                                           |         |                              |                    |      |             |                                     |                                |                                 |                            |
|----------------------------------|--------------|------------------------------------------------------------------------------------------------------------------------------------------------------------------------------------------------------------------------------------------------------------------------------------------------------------------------------------------------------------------------------------------------------------------------------------------------------------------------------------------------------------------------------------------------------------------------------------------------------------------------------------------------------------------------------------------------------------------------------------------------------------------------------------------------------------------------------------------------------------------------------------------------------------------------------------------------------------------------------------------------------------------------------------------------------------------------------------------------|-----------------------------------------------------------------------------------------------------------------------------------------------------------|---------|------------------------------|--------------------|------|-------------|-------------------------------------|--------------------------------|---------------------------------|----------------------------|
|                                  | Losordo 2011 | <p>Intervention arm: Low Dose (LD) and High Dose (HD) of CD34+ cells. Type of stem cells: CD34+ cells from mobilised peripheral blood.</p> <p>Summary of stem cell isolation and type and route of delivery: G-CSF was given to all participants at 5 µg/kg for 4 - 5 days. On day 5 leukapheresis was performed. The following day mononuclear cells were collected and CD34+ cells enriched using a commercially available device (Isoplex 300im) magnetic cell separation system. Cell suspension with &gt; 70% viability and &gt; 50% CD34+ cells were given at 2 doses of body weight with a maximum of 100 kg. Cell suspension was diluted in saline (0.9%NaCl) with 5%autologous plasma. Cells were injected into the myocardium. The injection was performed by NOGA mapping and at 10 sites (0.2 cc/ site) using a NOGA Myostar catheter. Dose of stem cells: 1 x 10<sup>6</sup> CD34 cells/kg and 5 x 10<sup>6</sup> CD 34 cells/kg. Timing of stem cell procedure: At least 3 months following MI. G-CSF details: G-CSF was given to all participants at 5 µg/kg for 4 - 5 days</p> | <p>Placebo. G-CSF was given to all participants at 5 µg/kg for 4 - 5 days. No cells were injected, only saline (0.9 % NaCl) with 5% autologous plasma</p> | USA     | 12                           | Follow-up duration | 60.8 | Mean        | 3                                   | 4                              | 111                             | 55                         |
| Review author, year, estimate ID | Trials       | Intervention: specific drugs and dosing                                                                                                                                                                                                                                                                                                                                                                                                                                                                                                                                                                                                                                                                                                                                                                                                                                                                                                                                                                                                                                                        | Comparator: specific drugs and dosing                                                                                                                     | Country | Length of follow-up (months) | Follow-up measure  | Age  | Age measure | Number of intervention group events | Number of control group events | Number of intervention patients | Number of control patients |

| Hemkens, 2016 8784a              | Morgan 2005     | Colchicine Dose: 2 x 0.6 mg/day for at least 24 months, some up to 72 months | Placebo at least 24 months, some up to 72 months                                               | USA     | 72                           | Follow-up duration | 55.551 | Mean        | 166                                 | 191                            | 274                             | 275                        |
|----------------------------------|-----------------|------------------------------------------------------------------------------|------------------------------------------------------------------------------------------------|---------|------------------------------|--------------------|--------|-------------|-------------------------------------|--------------------------------|---------------------------------|----------------------------|
|                                  | Antoniou 2006   | Colchicine dose: 1 mg/day plus prednisolone 10 mg/day                        | Interferon-c 1b 200 mg 3 x / week subcutaneously plus prednisolone 10 mg/d interferon gamma-1b | Greece  | 25                           | Follow-up duration | 67.08  | Mean        | 4                                   | 8                              | 18                              | 32                         |
|                                  |                 |                                                                              |                                                                                                |         |                              |                    |        |             |                                     |                                |                                 |                            |
| Review author, year, estimate ID | Trials          | Intervention: specific drugs and dosing                                      | Comparator: specific drugs and dosing                                                          | Country | Length of follow-up (months) | Follow-up measure  | Age    | Age measure | Number of intervention group events | Number of control group events | Number of intervention patients | Number of control patients |
| Yohannes, 2011 8511a             | Brusco 2003     | Tiotropium 18 ug daily                                                       | Placebo                                                                                        | Unclear | 6.04                         | Follow-up duration | 64.2   | Mean        | 12                                  | 20                             | 402                             | 400                        |
|                                  | Casaburi 2002   | Tiotropium 18 ug daily                                                       | Placebo                                                                                        | Unclear | 12                           | Follow-up duration | 65     | Mean        | 30                                  | 35                             | 533                             | 371                        |
|                                  | Chan 2007       | Tiotropium 18 ug daily                                                       | Placebo                                                                                        | Unclear | 12                           | Follow-up duration | 66.9   | Mean        | 51                                  | 25                             | 608                             | 305                        |
|                                  | dusser 2006     | Tiotropium 18 ug daily                                                       | Placebo                                                                                        | Unclear | 11.2                         | Follow-up duration | 64.8   | Mean        | 28                                  | 33                             | 500                             | 510                        |
|                                  | niewoehner 2005 | Tiotropium 18 ug daily                                                       | Placebo                                                                                        | Unclear | 6.04                         | Follow-up duration | 67.9   | Mean        | 64                                  | 87                             | 914                             | 915                        |
|                                  | tashkin 2008    | Tiotropium 18 ug daily                                                       | Placebo                                                                                        | Unclear | 48.4                         | Follow-up duration | 64.5   | Mean        | 759                                 | 811                            | 2968                            | 3006                       |
|                                  | vogelmier 2006  | Tiotropium 18 ug and placebo twice daily                                     | Placebo twice daily                                                                            | Unclear | 6.04                         | Follow-up duration | 62.6   | Mean        | 5                                   | 3                              | 209                             | 203                        |
|                                  |                 |                                                                              |                                                                                                |         |                              |                    |        |             |                                     |                                |                                 |                            |
| Review author, year, estimate ID | Trials          | Intervention: specific drugs and dosing                                      | Comparator: specific drugs and dosing                                                          | Country | Length of follow-up (months) | Follow-up measure  | Age    | Age measure | Number of intervention group events | Number of control group events | Number of intervention patients | Number of control patients |
| Zhang, 2011 8604b                | Bielecka A 2009 | Atorvastatin 10–40 mg/day                                                    | Placebo or blank control                                                                       | Unclear | 6                            | Follow-up duration | 57     | Mean        | 8                                   | 5                              | 41                              | 27                         |
|                                  | CORONA 2007     | Rosuvastatin 10 mg/day                                                       | Placebo or blank control                                                                       | Unclear | 32.8                         | Median             | 73     | Mean        | 622                                 | 669                            | 2514                            | 2497                       |
|                                  | GISSI-HF 2008   | Rosuvastatin 10 mg/day                                                       | Placebo or blank control                                                                       | Unclear | 46.8                         | Median             | 68     | Mean        | 629                                 | 634                            | 2285                            | 2289                       |
|                                  | Hamaad 2005     | Atorvastatin 40 mg/day                                                       | Placebo or blank control                                                                       | Unclear | 3                            | Follow-up duration | 67     | Mean        | 0                                   | 1                              | 13                              | 10                         |
|                                  | Krum H 2007     | Rosuvastatin 10 mg/day                                                       | Placebo or blank control                                                                       | Unclear | 5.5                          | Follow-up duration | 61     | Mean        | 0                                   | 3                              | 40                              | 45                         |

|                                  | Mozaffarian D 2005             | Atorvastatin 10 mg/day                  | Placebo or blank control              | Unclear                                                         | 2                            | Follow-up duration | 51      | Mean        | 0                                   | 0                              | 12                              | 10                         |
|----------------------------------|--------------------------------|-----------------------------------------|---------------------------------------|-----------------------------------------------------------------|------------------------------|--------------------|---------|-------------|-------------------------------------|--------------------------------|---------------------------------|----------------------------|
|                                  | Node K 2003                    | Simvastatin 5–10 mg/day                 | Placebo or blank control              | Unclear                                                         | 3.5                          | Follow-up duration | 54      | Mean        | 1                                   | 1                              | 24                              | 27                         |
|                                  | Sola S 2006                    | Atorvastatin 20 mg/day                  | Placebo or blank control              | Unclear                                                         | 12                           | Follow-up duration | 53      | Mean        | 8                                   | 13                             | 54                              | 54                         |
|                                  | Wojnicz R 2006                 | Atorvastatin 40 mg/day                  | Placebo or blank control              | Unclear                                                         | 6                            | Follow-up duration | 38      | Mean        | 0                                   | 2                              | 36                              | 38                         |
|                                  | Xie RQ 2008                    | Atorvastatin 10 mg/day                  | Placebo or blank control              | Unclear                                                         | 12                           | Follow-up duration | NA      |             | 6                                   | 18                             | 40                              | 41                         |
|                                  | Yamada T 2007                  | Atorvastatin 10 mg/day                  | Placebo or blank control              | Unclear                                                         | 31                           | Follow-up duration | 64      | Mean        | 2                                   | 6                              | 19                              | 19                         |
|                                  |                                |                                         |                                       |                                                                 |                              |                    |         |             |                                     |                                |                                 |                            |
| Review author, year, estimate ID | Trials                         | Intervention: specific drugs and dosing | Comparator: specific drugs and dosing | Country                                                         | Length of follow-up (months) | Follow-up measure  | Age     | Age measure | Number of intervention group events | Number of control group events | Number of intervention patients | Number of control patients |
| Zhang, 2011 8604f                | Bielecka-Dąbrowa A et al. 2009 | Atorvastatin 10–40 mg/day               | Placebo or blank control              | Unclear                                                         | 6                            | Follow-up duration | 57      | Mean        | 8                                   | 5                              | 41                              | 27                         |
|                                  | Hamaad et al. 2005             | Atorvastatin 40 mg/day                  | Placebo or blank control              | Unclear                                                         | 3                            | Follow-up duration | 67      | Mean        | 0                                   | 1                              | 13                              | 10                         |
|                                  | Mozaffarian D et al. 2005      | Atorvastatin 10 mg/day                  | Placebo or blank control              | Unclear                                                         | 2                            | Follow-up duration | 51      | Mean        | 0                                   | 0                              | 12                              | 10                         |
|                                  | Sola S et al. 2006             | Atorvastatin 20 mg/day                  | Placebo or blank control              | Unclear                                                         | 12                           | Follow-up duration | 53      | Mean        | 8                                   | 13                             | 54                              | 54                         |
|                                  | Wojnicz R et al. 2006          | Atorvastatin 40 mg/day                  | Placebo or blank control              | Unclear                                                         | 6                            | Follow-up duration | 38      | Mean        | 0                                   | 2                              | 36                              | 38                         |
|                                  | Xie RQ et al. 2008             | Atorvastatin 10 mg/day                  | Placebo or blank control              | Unclear                                                         | 12                           | Follow-up duration | NA      |             | 6                                   | 18                             | 40                              | 41                         |
|                                  | Yamada T et al. 2007           | Atorvastatin 10 mg/day                  | Placebo or blank control              | Unclear                                                         | 31                           | Follow-up duration | 64      | Mean        | 2                                   | 6                              | 19                              | 19                         |
|                                  |                                |                                         |                                       |                                                                 |                              |                    |         |             |                                     |                                |                                 |                            |
| Review author, year, estimate ID | Trials                         | Intervention: specific drugs and dosing | Comparator: specific drugs and dosing | Country                                                         | Length of follow-up (months) | Follow-up measure  | Age     | Age measure | Number of intervention group events | Number of control group events | Number of intervention patients | Number of control patients |
| Chen, 2015 8742a                 | RAAM-PEF 2011                  | Eplerenone: 25 (titrated to 50)mg/day   | Placebo                               | USA                                                             | 7                            | Follow-up duration | Unclear | Unclear     | 1                                   | 2                              | 23                              | 23                         |
|                                  | TOPCAT 2014                    | Spironolactone: 15–45 mg/day            | Placebo                               | Northa America, South America, Central America, Russia, Georgia | 39.6                         | Follow-up duration | Unclear | Unclear     | 206                                 | 245                            | 1722                            | 1723                       |

|                                  | Kurrelmeyer 2014 | Spironolactone: 25 mg/day                                                                                                | Placebo                               | USA     | 6                            | Follow-up duration | Unclear | Unclear     | 0                                   | 0                              | 24                              | 24                         |
|----------------------------------|------------------|--------------------------------------------------------------------------------------------------------------------------|---------------------------------------|---------|------------------------------|--------------------|---------|-------------|-------------------------------------|--------------------------------|---------------------------------|----------------------------|
|                                  | REMINDER 2014    | Eplerenone: 25 (titrated to 50) mg/day                                                                                   | Placebo                               | Europe  | 10.5                         | Follow-up duration | Unclear | Unclear     | 7                                   | 11                             | 506                             | 506                        |
|                                  |                  |                                                                                                                          |                                       |         |                              |                    |         |             |                                     |                                |                                 |                            |
| Review author, year, estimate ID | Trials           | Intervention: specific drugs and dosing                                                                                  | Comparator: specific drugs and dosing | Country | Length of follow-up (months) | Follow-up measure  | Age     | Age measure | Number of intervention group events | Number of control group events | Number of intervention patients | Number of control patients |
| Coeytaux, 2014 8747a             | Rubin 2002       | Bosentan                                                                                                                 | Placebo or standard therapy           | Unclear | 2 to 4 months of treatment   | Range              | Unclear | Unclear     | 6                                   | 9                              | 144                             | 69                         |
|                                  | Galie 2008       | Ambrisentan                                                                                                              | Placebo or standard therapy           | Unclear |                              |                    | Unclear | Unclear     | 4                                   | 2                              | 134                             | 67                         |
|                                  | Galie 2008b      | Ambrisentan                                                                                                              | Placebo or standard therapy           | Unclear |                              |                    | Unclear | Unclear     | 5                                   | 9                              | 127                             | 65                         |
|                                  |                  |                                                                                                                          |                                       |         |                              |                    |         |             |                                     |                                |                                 |                            |
| Review author, year, estimate ID | Trials           | Intervention: specific drugs and dosing                                                                                  | Comparator: specific drugs and dosing | Country | Length of follow-up (months) | Follow-up measure  | Age     | Age measure | Number of intervention group events | Number of control group events | Number of intervention patients | Number of control patients |
| Coeytaux, 2014 8747b             | Galie 2005       | Sildenafil                                                                                                               | Placebo or standard therapy           | Unclear | 2 to 4 months of treatment   | Range              | Unclear | Unclear     | 6                                   | 7                              | 207                             | 70                         |
|                                  | Simonneau 2008   | Sildenafil                                                                                                               | Placebo or standard therapy           | Unclear |                              |                    | Unclear | Unclear     | 8                                   | 11                             | 134                             | 131                        |
|                                  | Galie 2009       | Tadalafil                                                                                                                | Placebo or standard therapy           | Unclear |                              |                    | Unclear | Unclear     | 6                                   | 2                              | 323                             | 82                         |
|                                  | jing 2012        | Vardenafil                                                                                                               | Placebo or standard therapy           | Unclear |                              |                    | Unclear | Unclear     | 1                                   | 2                              | 44                              | 20                         |
|                                  |                  |                                                                                                                          |                                       |         |                              |                    |         |             |                                     |                                |                                 |                            |
| Review author, year, estimate ID | Trials           | Intervention: specific drugs and dosing                                                                                  | Comparator: specific drugs and dosing | Country | Length of follow-up (months) | Follow-up measure  | Age     | Age measure | Number of intervention group events | Number of control group events | Number of intervention patients | Number of control patients |
| Fisher, 2015 8770b               | assmus 2013      | Intracoronary bone marrow mononuclear cells 123 (69) $\times 10^6$ cells and 150 (77) $\times 10^6$ cells and Shock-wave | Shock-wave                            | Unclear | 4                            | Follow-up duration | Unclear | Unclear     | 9                                   | 20                             | 43                              | 39                         |
|                                  | bolli 2011       | Intracoronary cardiac stem cells 5-10 $\times 10^5$ cells                                                                | Control (no mock infusion or placebo) | Unclear | 12                           | Follow-up duration | Unclear | Unclear     | 1                                   | 0                              | 16                              | 7                          |

|                                  | heldman 2014a   | Intramuscular bone marrow-derived mesenchymal stem cells (dose not reported)                                              | Placebo                               | Unclear | 12                           | Follow-up duration | Unclear | Unclear     | 0                                   | 1                              | 19                              | 10                         |
|----------------------------------|-----------------|---------------------------------------------------------------------------------------------------------------------------|---------------------------------------|---------|------------------------------|--------------------|---------|-------------|-------------------------------------|--------------------------------|---------------------------------|----------------------------|
|                                  | heldman2014b    | Intramuscular bone marrow mononuclear cells (dose not reported)                                                           | Placebo                               | Unclear | 12                           | Follow-up duration | Unclear | Unclear     | 0                                   | 0                              | 19                              | 11                         |
|                                  | honold 2012     | Bone marrow-derived endothelial progenitor cells 20 (12)×10 <sup>6</sup> cells                                            | Control (no placebo)                  | Unclear | 60                           | Follow-up duration | Unclear | Unclear     | 0                                   | 2                              | 22                              | 10                         |
|                                  | menasche 2008   | Intramuscular skeletal myoblast Low Dose: 400 x10 <sup>6</sup> cells; High Dose: 800 x10 <sup>6</sup> cells               | Placebo                               | Unclear | 72                           | Mean               | Unclear | Unclear     | 1                                   | 2                              | 4                               | 3                          |
|                                  | patila 2014     | Bone marrow mononuclear cells Median 8.4×10 <sup>8</sup> cells                                                            | Placebo                               | Unclear | 12                           | Follow-up duration | Unclear | Unclear     | 0                                   | 0                              | 20                              | 19                         |
|                                  |                 |                                                                                                                           |                                       |         |                              |                    |         |             |                                     |                                |                                 |                            |
| Review author, year, estimate ID | Trials          | Intervention: specific drugs and dosing                                                                                   | Comparator: specific drugs and dosing | Country | Length of follow-up (months) | Follow-up measure  | Age     | Age measure | Number of intervention group events | Number of control group events | Number of intervention patients | Number of control patients |
| Jankowska, 2016 8790a            | toblli 2007     | Intravenous iron sucrose 200 mg                                                                                           | Saline                                | Unclear | 5                            | Follow-up duration | 75      | Mean        | 0                                   | 5                              | 20                              | 20                         |
|                                  | okonko 2008     | Intravenous iron sucrose 200 mg weekly until ferritin 500 microgam/L or more                                              | Saline                                | Unclear | 4.2                          | Follow-up duration | 63.371  | Mean        | 1                                   | 2                              | 24                              | 11                         |
|                                  | anker 2009      | Intravenous ferric carboxymaltose 200 mg weekly until repletion dose achieved                                             | Saline                                | Unclear | 6 to 6.5                     | Follow-up duration | 67.662  | Mean        | 7                                   | 9                              | 305                             | 154                        |
|                                  | ponikowski 2015 | Intravenous ferric carboxymaltose 500 mg or 1000 mg at baseline and week 6. Maintenance phase 500 mg at weeks 12, 24, 36. | Saline                                | Unclear | 13                           | Follow-up duration | 69.502  | Mean        | 10                                  | 32                             | 150                             | 151                        |
|                                  |                 |                                                                                                                           |                                       |         |                              |                    |         |             |                                     |                                |                                 |                            |
| Review author, year, estimate ID | Trials          | Intervention: specific drugs and dosing                                                                                   | Comparator: specific drugs and dosing | Country | Length of follow-up (months) | Follow-up measure  | Age     | Age measure | Number of intervention group events | Number of control group events | Number of intervention patients | Number of control patients |
| Kumar, 2014 8815a                | Ashworth 1998   | Propofol                                                                                                                  | desflurane                            | Unclear | Unclear                      | Unclear            | 44      | Mean        | 0                                   | 0                              | 30                              | 30                         |
|                                  | Jakobssen 1997  | Propofol                                                                                                                  | desflurane                            | Unclear | Unclear                      | Unclear            | 35      | Mean        | 0                                   | 0                              | 40                              | 40                         |



|                                  | Nathan 1998     | Propofol                                     | sevoflurane                           | Unclear             | Unclear                      | Unclear           | Unclear |             | 1                                   | 6                              | 26                              | 26                         |
|----------------------------------|-----------------|----------------------------------------------|---------------------------------------|---------------------|------------------------------|-------------------|---------|-------------|-------------------------------------|--------------------------------|---------------------------------|----------------------------|
|                                  | Raeder 1997     | Propofol                                     | sevoflurane                           | Unclear             | Unclear                      | Unclear           | 33      | Mean        | 0                                   | 0                              | 85                              | 84                         |
|                                  | Raeder 1998     | Propofol                                     | desflurane                            | Unclear             | Unclear                      | Unclear           | Unclear |             | 0                                   | 0                              | 30                              | 30                         |
|                                  | Rapp 1992       | Propofol                                     | desflurane                            | Unclear             | Unclear                      | Unclear           | 34      | Mean        | 0                                   | 4                              | 23                              | 68                         |
|                                  | Smith 1999      | Propofol                                     | sevoflurane                           | Unclear             | Unclear                      | Unclear           | 39      | Mean        | 0                                   | 1                              | 72                              | 139                        |
|                                  | Tan 2010        | Propofol                                     | sevoflurane                           | Unclear             | Unclear                      | Unclear           | 34      | Mean        | 1                                   | 4                              | 40                              | 40                         |
|                                  | White 2007      | Propofol                                     | sevoflurane                           | Unclear             | Unclear                      | Unclear           | 38      | Mean        | 3                                   | 6                              | 55                              | 67                         |
|                                  |                 |                                              |                                       |                     |                              |                   |         |             |                                     |                                |                                 |                            |
| Review author, year, estimate ID | Trials          | Intervention: specific drugs and dosing      | Comparator: specific drugs and dosing | Country             | Length of follow-up (months) | Follow-up measure | Age     | Age measure | Number of intervention group events | Number of control group events | Number of intervention patients | Number of control patients |
| Le, 2016 8817a                   | Boccanelli 2009 | Canrenone 25 mg (titrated to 50 mg/day)      | Placebo                               | Italy               | 12                           | Mean              | 62.502  | Mean        | 37                                  | 43                             | 218                             | 227                        |
|                                  | chan 2007       | Spironolactone 25 mg/day                     | Placebo                               | China               | 12                           | Mean              | 63.275  | Mean        | 2                                   | 4                              | 23                              | 25                         |
|                                  | cicoira 2002    | Spironolactone 25 mg (titrated to 50 mg/day) | Routine treatment                     | Italy               | 12                           | Mean              | 62.108  | Mean        | 1                                   | 2                              | 54                              | 52                         |
|                                  | deswal 2011     | Eplerenone 25 mg (titrated to 50 mg/day)     | Placebo                               | USA                 | 6                            | Mean              | 70.45   | Mean        | 3                                   | 6                              | 21                              | 23                         |
|                                  | edelmann 2013   | Spironolactone 25 mg/day                     | Placebo                               | Germany and Austria | 12                           | Mean              | 67      | Mean        | 60                                  | 50                             | 213                             | 209                        |
|                                  | gao 2007        | Spironolactone 20 mg/day                     | Placebo                               | China               | 6                            | Mean              | 54.5    | Mean        | 2                                   | 4                              | 58                              | 58                         |
|                                  | pitt 2014       | Spironolactone (15 to 45 mg/day)             | Placebo                               | International       | 39.6                         | Mean              | 68.7    | median      | 766                                 | 792                            | 1722                            | 1723                       |
|                                  | pitt 1999       | Spironolactone 25 mg (titrated to 50 mg/day) | Placebo                               | International       | 24                           | Mean              | 65      | Mean        | 614                                 | 700                            | 822                             | 841                        |
|                                  | zannad 2011     | Eplerenone 25 mg (titrated to 50 mg/day)     | Placebo                               | International       | 21                           | Mean              | 68.65   | Mean        | 408                                 | 491                            | 1364                            | 1373                       |
|                                  | modena 2001     | Potassium canrenoate 50 mg/day               | Placebo                               | Italy               | 12                           | Mean              | 60.435  | Mean        | 0                                   | 4                              | 24                              | 22                         |



| Review author, year, estimate ID | Trials          | Intervention: specific drugs and dosing       | Comparator: specific drugs and dosing | Country             | Length of follow-up (months) | Follow-up measure | Age    | Age measure | Number of intervention group events | Number of control group events | Number of intervention patients | Number of control patients |
|----------------------------------|-----------------|-----------------------------------------------|---------------------------------------|---------------------|------------------------------|-------------------|--------|-------------|-------------------------------------|--------------------------------|---------------------------------|----------------------------|
| Le, 2016 8817e                   | Boccanelli 2009 | Canrenone 25 mg (titrated to 50 mg/day)       | Placebo                               | Italy               | 12                           | Mean              | 62.502 | Mean        | 14                                  | 29                             | 218                             | 227                        |
|                                  | Chan 2007       | Spironolactone 25 mg/day + candesartan        | Placebo + candesartan                 | China               | 12                           | Mean              | 63.275 | Mean        | 2                                   | 4                              | 23                              | 25                         |
|                                  | cicoira 2002    | Spironolactone 25 mg (titrated to 50 mg/day)  | Routine treatment                     | Italy               | 12                           | Mean              | 62.108 | Mean        | 1                                   | 2                              | 54                              | 52                         |
|                                  | deswal 2011     | Eplerenone 25 mg (titrated to 50 mg/day)      | Placebo                               | USA                 | 6                            | Mean              | 70.45  | Mean        | 1                                   | 2                              | 21                              | 23                         |
|                                  | edelmann 2013   | Spironolactone 25 mg/day                      | Placebo                               | Germany and Austria | 12                           | Mean              | 67     | Mean        | 21                                  | 15                             | 213                             | 209                        |
|                                  | pitt 2014       | Spironolactone (15 to 45 mg/day)              | Placebo                               | International       | 39.6                         | Mean              | 68.7   | Median      | 206                                 | 245                            | 1722                            | 1723                       |
|                                  | pitt 1999       | Spironolactone 25 mg (titrated to 50 mg/day)  | Placebo                               | International       | 24                           | Mean              | 65     | Mean        | 377                                 | 448                            | 822                             | 841                        |
|                                  | vizzardi 2013   | Spironolactone 25 mg (titrated to 100 mg/day) | Placebo                               | Italy               | 44                           | Mean              | 63     | Mean        | 6                                   | 24                             | 65                              | 65                         |
|                                  | zannad 2011     | Eplerenone 25 mg (titrated to 50 mg/day)      | Placebo                               | International       | 21                           | Mean              | 68.65  | Mean        | 304                                 | 399                            | 1364                            | 1373                       |
|                                  |                 |                                               |                                       |                     |                              |                   |        |             |                                     |                                |                                 |                            |
| Review author, year, estimate ID | Trials          | Intervention: specific drugs and dosing       | Comparator: specific drugs and dosing | Country             | Length of follow-up (months) | Follow-up measure | Age    | Age measure | Number of intervention group events | Number of control group events | Number of intervention patients | Number of control patients |
| Liu, 2014 8826a                  | Abulhul 2012    | Atorvastatin 40 mg/day                        | no statin                             | Unclear             | 6                            | Mean              | 72     | Mean        | 1                                   | 1                              | 28                              | 28                         |
|                                  | Bielecka 2009   | atorvastatin 10-40 mg/day                     | no statin                             | Unclear             | 6                            | Mean              | 57     | Mean        | 0                                   | 1                              | 41                              | 27                         |
|                                  | Hamaad 2005     | Atorvastatin 40 mg/day                        | placebo                               | Unclear             | 3                            | Mean              | 67     | Mean        | 0                                   | 1                              | 12                              | 10                         |
|                                  | Node 2003       | simvastatin 5-10 mg/day                       | placebo                               | Unclear             | 3.5                          | Mean              | 54     | Mean        | 1                                   | 1                              | 23                              | 27                         |
|                                  | Sola 2006       | atorvastatin 20 mg/day                        | placebo                               | Unclear             | 12                           | Mean              | 53     | Mean        | 8                                   | 13                             | 46                              | 43                         |
|                                  | Takano 2013     | pitavastatin 2 mg/day                         | no statin                             | Unclear             | 35.5                         | Mean              | 62     | Mean        | 39                                  | 47                             | 288                             | 286                        |

|                                  | Wojnicz 2006                | atorvastatin 40 mg/day                              | no statin                             | Unclear                                                                                                                                                                                                                                                                                                  | 6                            | Mean               | 38      | Mean        | 0                                   | 2                              | 34                              | 37                         |
|----------------------------------|-----------------------------|-----------------------------------------------------|---------------------------------------|----------------------------------------------------------------------------------------------------------------------------------------------------------------------------------------------------------------------------------------------------------------------------------------------------------|------------------------------|--------------------|---------|-------------|-------------------------------------|--------------------------------|---------------------------------|----------------------------|
|                                  | Xie 2010                    | atorvastatin 10-20 mg/day                           | no statin                             | Unclear                                                                                                                                                                                                                                                                                                  | 12                           | Mean               | NA      | Mean        | 10                                  | 18                             | 78                              | 41                         |
|                                  | Yamade 2007                 | atorvastatin 10 mg/day                              | placebo                               | Unclear                                                                                                                                                                                                                                                                                                  | 31                           | Mean               | 64      | Mean        | 2                                   | 6                              | 19                              | 19                         |
|                                  |                             |                                                     |                                       |                                                                                                                                                                                                                                                                                                          |                              |                    |         |             |                                     |                                |                                 |                            |
| Review author, year, estimate ID | Trials                      | Intervention: specific drugs and dosing             | Comparator: specific drugs and dosing | Country                                                                                                                                                                                                                                                                                                  | Length of follow-up (months) | Follow-up measure  | Age     | Age measure | Number of intervention group events | Number of control group events | Number of intervention patients | Number of control patients |
| Lopez, 2015 8829a                | sandborn 2009               | Anti-tumor necrosis factor                          | Placebo                               | Unclear                                                                                                                                                                                                                                                                                                  | Unclear                      | Unclear            | Unclear | Unclear     | 64                                  | 46                             | 484                             | 244                        |
|                                  | feagan 2013                 | Anti-tumor necrosis factor                          | Placebo                               | Unclear                                                                                                                                                                                                                                                                                                  | Unclear                      | Unclear            | Unclear | Unclear     | 53                                  | 75                             | 480                             | 483                        |
|                                  |                             |                                                     |                                       |                                                                                                                                                                                                                                                                                                          |                              |                    |         |             |                                     |                                |                                 |                            |
| Review author, year, estimate ID | Trials                      | Intervention: specific drugs and dosing             | Comparator: specific drugs and dosing | Country                                                                                                                                                                                                                                                                                                  | Length of follow-up (months) | Follow-up measure  | Age     | Age measure | Number of intervention group events | Number of control group events | Number of intervention patients | Number of control patients |
| Ni, 2014 8850a                   | Jones 2011 (ACCLAIM/COPD I) | acilidium 200 µg once daily via the Genuair inhaler | placebo                               | 16 European countries (one in Andorra, five in Austria, four in Belgium, 10 in Bulgaria, eight in the Czech Republic, three in Denmark, nine in France, 10 in Germany, eight in Hungary, six in Italy, four in Netherlands, nine in Poland, nine in Romania, 25 in Russia, eight in Spain, 13 in the UK) | 13                           | Follow-up duration | 62.422  | Mean        | 40                                  | 14                             | 616                             | 210                        |

|  |                                  |                                                                                                                                                                                                                                   |         |                                                                                                                                                                                                      |    |                    |        |      |    |    |     |     |
|--|----------------------------------|-----------------------------------------------------------------------------------------------------------------------------------------------------------------------------------------------------------------------------------|---------|------------------------------------------------------------------------------------------------------------------------------------------------------------------------------------------------------|----|--------------------|--------|------|----|----|-----|-----|
|  | Jones 2011<br>(ACCLAIM/COPD II)  | aclidinium 200 µg once daily via the Genuair inhaler                                                                                                                                                                              | placebo | Seven countries (72 sites in the United States, 13 sites in Argentina, 13 sites in Australia, seven sites in Canada, two sites in Mexico, three sites in New Zealand and nine sites in South Africa) | 13 | Follow-up duration | 65.125 | Mean | 36 | 23 | 594 | 201 |
|  | Chanez 2010                      | inhaled aclidinium 25µg, 50µg, 100µg, 200µg, or 400µg (via multidose dry-powder inhaler, Genuair)                                                                                                                                 | placebo | Europe and Russia                                                                                                                                                                                    | 4  | Follow-up duration | 61.407 | Mean | 2  | 0  | 335 | 64  |
|  | Maltais 2011                     | inhaled aclidinium 200 µg once-daily via a multidose dry powder inhaler                                                                                                                                                           | placebo | United States and Canada                                                                                                                                                                             | 6  | Follow-up duration | 64.84  | Mean | 1  | 3  | 86  | 95  |
|  | Kerwin 2012<br>(ACCORD COPD I)   | inhaled aclidinium 200 µg twice daily, inhaled aclidinium 400 µg twice daily at the same time in the morning (between 8:00 and 10:00 AM) and evening (between 8:00 and 10:00 PM) via a multiple-dose dry powder inhaler (Genuair) | placebo | United States and Canada                                                                                                                                                                             | 14 | Follow-up duration | 64.372 | Mean | 3  | 1  | 374 | 185 |
|  | Rennard 2013<br>(ACCORD COPD II) | inhaled aclidinium 200 µg twice daily, inhaled aclidinium 400 µg twice daily via a multiple-dose dry powder inhaler (Genuair/Pressair)                                                                                            | Placebo | United States and Canada                                                                                                                                                                             | 14 | Follow-up duration | 62.763 | Mean | 6  | 5  | 359 | 182 |

|  |                               |                                                                                                                                                                                 |         |                                                                                                                                                                                                                                                                                                                                                                                                                              |    |                    |        |      |   |    |     |     |
|--|-------------------------------|---------------------------------------------------------------------------------------------------------------------------------------------------------------------------------|---------|------------------------------------------------------------------------------------------------------------------------------------------------------------------------------------------------------------------------------------------------------------------------------------------------------------------------------------------------------------------------------------------------------------------------------|----|--------------------|--------|------|---|----|-----|-----|
|  | Singh 2014<br>(ACLIFORM)      | inhaled aclidinium/formoterol fixed dose combination (FDC) high dose twice daily, inhaled aclidinium/formoterol FDC low dose twice daily, inhaled aclidinium 400 µg twice daily | Placebo | 22 countries (two sites in Austria, two in Belgium, five in Bulgaria, two in Croatia, 12 in Czech Republic, four in Denmark, five in Finland, seven in France, 28 in Germany, 15 in Hungary, four in Italy, eight in Republic of Korea, seven in Netherlands, 21 in Poland, 12 in Romania, five in Russia, seven in Slovakia, nine in South Africa, seven in Spain, five in Sweden, 14 in Ukraine, 16 in the United Kingdom) | 24 | Follow-up duration | 63.469 | Mean | 6 | 5  | 385 | 194 |
|  | Jones 2012<br>(ATTAIN)        | inhaled aclidinium 200 µg twice daily or 400 µg twice daily via amultiple-dose dry powder inhaler (Genuair)                                                                     | Placebo | 11 countries (10 sites in the Czech Republic, five in France, 17 in Germany, 13 in Hungary, three in Italy, one in Peru, 21 in Poland, 10 in the Russian Federation, five in Spain, 13 in South Africa and five in the Ukraine)                                                                                                                                                                                              | 24 | Follow-up duration | 72.856 | Mean | 5 | 10 | 546 | 273 |
|  | D'Urzo 2013<br>(AUGMENT COPD) | inhaled fixed dose combination of aclidinium 400 µg plus formoterol 6 µg or 12 µg twice daily, inhaled aclidinium 400 µg twice daily                                            | Placebo | 193 sites in the United States, 11 in Australia, 10 in Canada and eight in New Zealand                                                                                                                                                                                                                                                                                                                                       | 24 | Follow-up duration | 63.953 | Mean | 7 | 6  | 337 | 332 |



| Review author, year, estimate ID | Trials                                      | Intervention: specific drugs and dosing | Comparator: specific drugs and dosing | Country        | Length of follow-up (months) | Follow-up measure | Age | Age measure | Number of intervention group events | Number of control group events | Number of intervention patients | Number of control patients |
|----------------------------------|---------------------------------------------|-----------------------------------------|---------------------------------------|----------------|------------------------------|-------------------|-----|-------------|-------------------------------------|--------------------------------|---------------------------------|----------------------------|
| Xie, 2016 8916a                  | AIRE study investigators 1993 (AIRE)        | Ramipril (5 to 10 mg/day)               | Placebo                               | Worldwide      | 15                           | Mean              | 65  | Mean        | 143                                 | 178                            | 1004                            | 982                        |
|                                  | Pfeffer 1992 (SAVE)                         | Captopril (6.25-150 mg/day)             | Placebo                               | USA and Canada | 42                           | Mean              | 59  | Mean        | 154                                 | 192                            | 1115                            | 1116                       |
|                                  | SOLVD investigators 1992 (SOLVD prevention) | Enalapril (2.5-20 mg/day)               | Placebo                               | Worldwide      | 37                           | Mean              | 59  | Mean        | 184                                 | 273                            | 2111                            | 2117                       |
|                                  | SOLVD investigators 1991 (SOLVD treatment)  | Enalapril (2.5-20 mg/day)               | Placebo                               | Worldwide      | 41                           | Mean              | 61  | Mean        | 332                                 | 470                            | 1285                            | 1284                       |
|                                  | Kober 1995 (TRACE)                          | Trandolapril (1-4 mg/day)               | Placebo                               | Denmark        | 26                           | Mean              | 68  | Mean        | 125                                 | 171                            | 876                             | 873                        |
|                                  |                                             |                                         |                                       |                |                              |                   |     |             |                                     |                                |                                 |                            |
| Review author, year, estimate ID | Trials                                      | Intervention: specific drugs and dosing | Comparator: specific drugs and dosing | Country        | Length of follow-up (months) | Follow-up measure | Age | Age measure | Number of intervention group events | Number of control group events | Number of intervention patients | Number of control patients |
| Xie, 2016 8916b                  | Matsumori 2003 (ARCH J)                     | Candesartan cilexetil (8 mg/day)        | Placebo                               | Japan          | 6                            | Mean              | 64  | Mean        | 8                                   | 17                             | 148                             | 144                        |
|                                  | McMurray 2003 (CHARM ADDED)                 | Candesartan (4-32 mg/day)               | Placebo                               | Worldwide      | 41                           | Median            | 64  | Mean        | 309                                 | 356                            | 1276                            | 1272                       |
|                                  | Granger 2003 (CHARM ALTERNATIVE)            | Candesartan (4-32 mg/day)               | Placebo                               | Worldwide      | 34                           | Median            | 67  | Mean        | 207                                 | 286                            | 1013                            | 1015                       |
|                                  | Cohn 2001 (VALHEFT)                         | Valsartan (80-320 mg/day)               | Placebo                               | Worldwide      | 23                           | Mean              | 63  | Mean        | 346                                 | 455                            | 2511                            | 2499                       |
|                                  |                                             |                                         |                                       |                |                              |                   |     |             |                                     |                                |                                 |                            |
| Review author, year, estimate ID | Trials                                      | Intervention: specific drugs and dosing | Comparator: specific drugs and dosing | Country        | Length of follow-up (months) | Follow-up measure | Age | Age measure | Number of intervention group events | Number of control group events | Number of intervention patients | Number of control patients |
| Xie, 2016 8916c                  | Boccanelli 2009 (AREA IN CHF)               | Canrenone (25-50 mg/day)                | Placebo                               | Italy          | 12                           | Mean              | 63  | Mean        | 6                                   | 17                             | 218                             | 227                        |



|                                  | Zannad 2011 (EMPHASIS HF) | Eplerenone (25-50 mg/day)                                                                                | Placebo                                                                                                                                                 | Worldwide | 21                           | Median             | 69      | Mean        | 164                                 | 253                            | 1364                            | 1373                       |
|----------------------------------|---------------------------|----------------------------------------------------------------------------------------------------------|---------------------------------------------------------------------------------------------------------------------------------------------------------|-----------|------------------------------|--------------------|---------|-------------|-------------------------------------|--------------------------------|---------------------------------|----------------------------|
|                                  | Pitt 2003 (EPHESUS)       | Eplerenone (25-50 mg/day)                                                                                | Placebo                                                                                                                                                 | Worldwide | 16                           | Median             | 64      | Mean        | 345                                 | 391                            | 3319                            | 3313                       |
|                                  | Pitt 1999 (RALES)         | Spironolactone (25 mg/day)                                                                               | Placebo                                                                                                                                                 | Worldwide | 24                           | Mean               | 65      | Mean        | 215                                 | 300                            | 822                             | 841                        |
|                                  |                           |                                                                                                          |                                                                                                                                                         |           |                              |                    |         |             |                                     |                                |                                 |                            |
| Review author, year, estimate ID | Trials                    | Intervention: specific drugs and dosing                                                                  | Comparator: specific drugs and dosing                                                                                                                   | Country   | Length of follow-up (months) | Follow-up measure  | Age     | Age measure | Number of intervention group events | Number of control group events | Number of intervention patients | Number of control patients |
| Yang, 2015 8918n                 | Bosquet Sanz 2006         | Single drug: One dose of tobramycin 100 mg im and another one 8 h afterwards                             | One dose of tobramycin 100 mg im and oral ciprofloxacin 500 mg, one dose 30 min before biopsy and afterwards the ciprofloxacin 12/12h 3d                | Spain     | 0.0986842                    | Follow-up duration | Unclear | Unclear     | 15                                  | 3                              | 71                              | 86                         |
|                                  | Chan 2012                 | Single drug: 1 g amoxicillin-clavulanate 2 h before and 12/12h 1d after prostate biopsy                  | Combined drugs: amoxicillin-clavulanate, ciprofloxacin 250 mg 2 h before and 12/12h 1d after prostate biopsy                                            | China     | 1.2828947                    | Follow-up duration | Unclear | Unclear     | 4                                   | 0                              | 70                              | 65                         |
|                                  | Pace 2012                 | Single drug: orally ciprofloxacin 1,000 mg every 24 h starting the evening before biopsy until 4 d after | Combined drugs: ciprofloxacin 1,000 mg every 24 h starting the evening before biopsy until 4 d after and a dose of ceftriaxone 1 g was injected locally | Italy     | 0.1973684                    | Follow-up duration | Unclear | Unclear     | 4                                   | 1                              | 179                             | 188                        |
|                                  |                           |                                                                                                          |                                                                                                                                                         |           |                              |                    |         |             |                                     |                                |                                 |                            |
| Review author, year, estimate ID | Trials                    | Intervention: specific drugs and dosing                                                                  | Comparator: specific drugs and dosing                                                                                                                   | Country   | Length of follow-up (months) | Follow-up measure  | Age     | Age measure | Number of intervention group events | Number of control group events | Number of intervention patients | Number of control patients |
| Zhang, 2016 8922l                | Cleland 2006              | Perindopril                                                                                              | Placebo                                                                                                                                                 | Unclear   | 26.2                         | Mean               | 75      | Mean        | 64                                  | 73                             | 424                             | 426                        |
|                                  | Deswal 2011               | Eplerenone                                                                                               | Placebo                                                                                                                                                 | Unclear   | 6                            | Mean               | 70.37   | Mean        | 1                                   | 2                              | 21                              | 23                         |
|                                  | Massie 2008               | Irbesartan                                                                                               | Placebo                                                                                                                                                 | Unclear   | 49.5                         | Mean               | 72      | Mean        | 325                                 | 336                            | 2067                            | 2061                       |
|                                  | Pitt 2014                 | Spironolactone                                                                                           | Placebo                                                                                                                                                 | Unclear   | 39.6                         | Mean               | 68.7    | Mean        | 206                                 | 245                            | 1722                            | 1723                       |

|                                  | Yip 2008a                                      | Irbesartan + diuretics                  | Diuretics                             | Unclear | 12                           | Mean               | 74.06  | Mean        | 6                                   | 6                              | 56                              | 50                         |
|----------------------------------|------------------------------------------------|-----------------------------------------|---------------------------------------|---------|------------------------------|--------------------|--------|-------------|-------------------------------------|--------------------------------|---------------------------------|----------------------------|
|                                  | Yip 2008b                                      | Ramipril + diuretics                    | Diuretics                             | Unclear | 12                           | Mean               | 73.47  | Mean        | 5                                   | 6                              | 45                              | 50                         |
|                                  | Yusuf 2003                                     | Candesartan                             | Placebo                               | Unclear | 8.5                          | Mean               | 67.15  | Mean        | 241                                 | 276                            | 1514                            | 1509                       |
|                                  | Zi 2003                                        | Quinapril                               | Placebo                               | Unclear | 6                            | Mean               | 78     | Mean        | 2                                   | 5                              | 36                              | 38                         |
|                                  |                                                |                                         |                                       |         |                              |                    |        |             |                                     |                                |                                 |                            |
| Review author, year, estimate ID | Trials                                         | Intervention: specific drugs and dosing | Comparator: specific drugs and dosing | Country | Length of follow-up (months) | Follow-up measure  | Age    | Age measure | Number of intervention group events | Number of control group events | Number of intervention patients | Number of control patients |
| Zhou, 2014 8928                  | Rosano 2003                                    | Trimetazidine                           | Placebo                               | Unclear | 6                            | Follow-up duration | 65.5   | Mean        | 0                                   | 1                              | 16                              | 16                         |
|                                  | Vitale 2004                                    | Trimetazidine                           | Placebo                               | Unclear | 6                            | Follow-up duration | 77.511 | Mean        | 1                                   | 4                              | 23                              | 24                         |
|                                  | Fragasso 2006                                  | Trimetazidine                           | Placebo                               | Unclear | 12                           | Follow-up duration | 64.982 | Mean        | 6                                   | 11                             | 29                              | 29                         |
|                                  | Tuunanen 2008                                  | Trimetazidine                           | Placebo                               | Unclear | 3                            | Follow-up duration | 58.263 | Mean        | 0                                   | 1                              | 12                              | 7                          |
|                                  |                                                |                                         |                                       |         |                              |                    |        |             |                                     |                                |                                 |                            |
| Review author, year, estimate ID | Trials                                         | Intervention: specific drugs and dosing | Comparator: specific drugs and dosing | Country | Length of follow-up (months) | Follow-up measure  | Age    | Age measure | Number of intervention group events | Number of control group events | Number of intervention patients | Number of control patients |
| Ziff, 2015 8931a                 | Digitalis Investigation Group 1997 (DIG trial) | Digoxin                                 | Placebo                               | Unclear | 37.2                         | Follow-up duration | 63.5   | Mean        | 2184                                | 2282                           | 3397                            | 3403                       |
|                                  | Ahmed 2006                                     | Digoxin                                 | Placebo                               | Unclear | 37.2                         | Follow-up duration | 67     | Mean        | 332                                 | 330                            | 492                             | 496                        |
|                                  |                                                |                                         |                                       |         |                              |                    |        |             |                                     |                                |                                 |                            |
| Review author, year, estimate ID | Trials                                         | Intervention: specific drugs and dosing | Comparator: specific drugs and dosing | Country | Length of follow-up (months) | Follow-up measure  | Age    | Age measure | Number of intervention group events | Number of control group events | Number of intervention patients | Number of control patients |
| Zou, 2016 8933a                  | Jones 2011 (ACCLAIM/COPD 1)                    | Acidinium 200 µg once daily             | Placebo                               | Unclear | 12                           | Follow-up duration | 62.415 | Mean        | 40                                  | 14                             | 616                             | 210                        |
|                                  | Jones 2011 (ACCLAIM/COPD 2)                    | Acidinium 200 µg once daily             | Placebo                               | Unclear | 12                           | Follow-up duration | 65.124 | Mean        | 36                                  | 23                             | 594                             | 201                        |
|                                  | Kerwin 2012 (ACCORD COPD 1)                    | AC: 200 µg twice daily (400 µg total)   | Placebo                               | Unclear | 2.7906977                    | Follow-up duration | 64.356 | Mean        | 3                                   | 1                              | 374                             | 185                        |

|                                  | Rennard 2013 (ACCORD COPD 2) | AC: 200 µg twice daily (400 µg total)                             | Placebo                                      | Unclear                                                   | 2.7906977                    | Follow-up duration | 62.744 | Mean        | 6                                   | 5                              | 359                             | 182                        |
|----------------------------------|------------------------------|-------------------------------------------------------------------|----------------------------------------------|-----------------------------------------------------------|------------------------------|--------------------|--------|-------------|-------------------------------------|--------------------------------|---------------------------------|----------------------------|
|                                  | Singh 2014 (ACLIFORM)        | AC: 400 µg twice daily                                            | Placebo                                      | Unclear                                                   | 5.5813953                    | Follow-up duration | 63.485 | Mean        | 6                                   | 5                              | 385                             | 194                        |
|                                  | Jones 2012 (ATTAIN)          | AC: 200 µg twice daily 400 µg                                     | Placebo                                      | Unclear                                                   | 5.5813953                    | Follow-up duration | 62.349 | Mean        | 5                                   | 10                             | 546                             | 273                        |
|                                  | D'Urzo 2014 (AUGMENT COPD)   | AC: 400 µg twice daily                                            | Placebo                                      | Unclear                                                   | 5.5813953                    | Follow-up duration | 63.966 | Mean        | 7                                   | 6                              | 337                             | 332                        |
|                                  |                              |                                                                   |                                              |                                                           |                              |                    |        |             |                                     |                                |                                 |                            |
| Review author, year, estimate ID | Trials                       | Intervention: specific drugs and dosing                           | Comparator: specific drugs and dosing        | Country                                                   | Length of follow-up (months) | Follow-up measure  | Age    | Age measure | Number of intervention group events | Number of control group events | Number of intervention patients | Number of control patients |
| La Mantia, 2010 4260             | Johnson 1995                 | Subcutaneous GA 20 mg daily                                       | Subcutaneous placebo self-administered daily | USA                                                       | 36                           | Follow-up duration | 34.45  | Mean        | 14                                  | 20                             | 125                             | 125                        |
|                                  | Comi 2001                    | Subcutaneous GA 20 mg daily                                       | Placebo                                      | Europe and Canada                                         | 9                            | Follow-up duration | 34.05  | Mean        | 16                                  | 30                             | 119                             | 120                        |
|                                  |                              |                                                                   |                                              |                                                           |                              |                    |        |             |                                     |                                |                                 |                            |
| Review author, year, estimate ID | Trials                       | Intervention: specific drugs and dosing                           | Comparator: specific drugs and dosing        | Country                                                   | Length of follow-up (months) | Follow-up measure  | Age    | Age measure | Number of intervention group events | Number of control group events | Number of intervention patients | Number of control patients |
| Nannini, 2013 5533g              | Doherty 2012                 | Mometasone furoate/formoterol 200/10 mcg twice daily              | Placebo                                      | North, Central and South America, Europe, Africa and Asia | 12                           | Follow-up duration | 59.3   | Mean        | 4                                   | 12                             | 239                             | 236                        |
|                                  | Tashkin 2012                 | Mometasone furoate/formoterol 200/10 mcg twice daily              | Placebo                                      | South America, Asia, Africa, Europe and North America     | 12                           | Follow-up duration | 63.3   | Mean        | 3                                   | 7                              | 207                             | 212                        |
|                                  |                              |                                                                   |                                              |                                                           |                              |                    |        |             |                                     |                                |                                 |                            |
| Review author, year, estimate ID | Trials                       | Intervention: specific drugs and dosing                           | Comparator: specific drugs and dosing        | Country                                                   | Length of follow-up (months) | Follow-up measure  | Age    | Age measure | Number of intervention group events | Number of control group events | Number of intervention patients | Number of control patients |
| Su, 2014 7504                    | Amit 2006                    | 60 ug of nitroprusside diluted in saline solution as a 5-mL bolus | Identical volume of saline solution          | Unclear                                                   | Unclear                      | Unclear            | 62     | Mean        | 5                                   | 10                             | 48                              | 50                         |
|                                  | Pan 2009                     | 100 ug Nitroprusside (diluted to 20 ug/ ml)                       | 100 ug Nitroglycerin                         | Unclear                                                   | Unclear                      | Unclear            | 53     | Mean        | 4                                   | 11                             | 46                              | 46                         |



| Review author, year, estimate ID | Trials                  | Intervention: specific drugs and dosing                                                                                               | Comparator: specific drugs and dosing                   | Country   | Length of follow-up (months) | Follow-up measure | Age     | Age measure | Number of intervention group events | Number of control group events | Number of intervention patients | Number of control patients |
|----------------------------------|-------------------------|---------------------------------------------------------------------------------------------------------------------------------------|---------------------------------------------------------|-----------|------------------------------|-------------------|---------|-------------|-------------------------------------|--------------------------------|---------------------------------|----------------------------|
| Jong, 2002 3781d                 | McKelvie 1999 (RESOLVD) | Candesartan 4 mg; 8mg; 16mg once daily and Enalapril 10 mg twice a day                                                                | Enalapril 10 mg twice a day                             | Unclear   | 10.75                        | Mean              | Unclear | Unclear     | 31                                  | 7                              | 332                             | 109                        |
|                                  | Tonkon 2000             | Irbesartan 150 mg once daily and an ACE                                                                                               | Placebo and ACE                                         | Unclear   | 3                            | Mean              | Unclear | Unclear     | 2                                   | 1                              | 57                              | 52                         |
|                                  | Cohn 2001 (Val-HeFT)    | Valsartan 160 mg twice a day and an ACE                                                                                               | Placebo and ACE                                         | Unclear   | 23                           | Mean              | Unclear | Unclear     | 346                                 | 455                            | 2511                            | 2499                       |
|                                  |                         |                                                                                                                                       |                                                         |           |                              |                   |         |             |                                     |                                |                                 |                            |
| Review author, year, estimate ID | Trials                  | Intervention: specific drugs and dosing                                                                                               | Comparator: specific drugs and dosing                   | Country   | Length of follow-up (months) | Follow-up measure | Age     | Age measure | Number of intervention group events | Number of control group events | Number of intervention patients | Number of control patients |
| Edmonds, 2012 2159               | Afilalo 1999            | Beclomethasone dipropionate by metered dose inhaler 1 mg at 0, 30 min, 1 h, 2 h, 4 h (total 5 mg)                                     | placebo metered dose inhaler at the same time intervals | Canada    | Unclear                      | Unclear           | Unclear | Unclear     | 2                                   | 5                              | 28                              | 26                         |
|                                  | Guttman 1997            | Beclomethasone dipropionate 1 mg by metered dose inhaler plus spacer at 0, 0.5, 1, 2, 4, 6, 8 (total 7 mg)                            | placebo metered dose inhaler at the same time intervals | Canada    | Unclear                      | Unclear           | Unclear | Unclear     | 8                                   | 12                             | 30                              | 30                         |
|                                  | Rodrigo 1998            | Flunisolide, 1 mg every 10 min by metered dose inhaler with spacer for 3 h (total dose of flunisolide 18 mg)                          | placebo metered dose inhaler at the same time intervals | Uruguay   | Unclear                      | Unclear           | 32.45   | Mean        | 4                                   | 12                             | 47                              | 47                         |
|                                  | Rodrigo 2003            | Fluticasone 1000 µg, salmeterol 400 µg, and ipratropium 84 µg every 10 min by metered dose inhaler with spacer for 3 h.               | placebo metered dose inhaler at the same time intervals | Uruguay   | Unclear                      | Unclear           | 33.845  | Mean        | 6                                   | 15                             | 58                              | 62                         |
|                                  | Starobin 2008           | Patients (Flixotide group) received inhalation of FlixotideNebules®(fluticasone propionate) (GlaxoWellcome, Australia) 2 mL (0.5 mg). | placebo metered dose inhaler at the same time intervals | Australia | Unclear                      | Unclear           | 47.637  | Mean        | 5                                   | 11                             | 26                              | 23                         |
|                                  |                         |                                                                                                                                       |                                                         |           |                              |                   |         |             |                                     |                                |                                 |                            |
| Review author, year, estimate ID | Trials                  | Intervention: specific drugs and dosing                                                                                               | Comparator: specific drugs and dosing                   | Country   | Length of follow-up (months) | Follow-up measure | Age     | Age measure | Number of intervention group events | Number of control group events | Number of intervention patients | Number of control patients |



| Review author, year, estimate ID | Trials           | Intervention: specific drugs and dosing                                                                                                | Comparator: specific drugs and dosing                                                                                                                                      | Country | Length of follow-up (months) | Follow-up measure  | Age     | Age measure | Number of intervention group events | Number of control group events | Number of intervention patients | Number of control patients |
|----------------------------------|------------------|----------------------------------------------------------------------------------------------------------------------------------------|----------------------------------------------------------------------------------------------------------------------------------------------------------------------------|---------|------------------------------|--------------------|---------|-------------|-------------------------------------|--------------------------------|---------------------------------|----------------------------|
| Kuenzli, 2010, 4206c             | RESOLVD 1999     | Candesartan 16mg once daily and Enalapril 10mg twice                                                                                   | Enalapril 10mg twice daily                                                                                                                                                 | Unclear | 9.6                          | Follow-up duration | 63.753  | Mean        | 31                                  | 7                              | 332                             | 109                        |
|                                  | CHARM added 2003 | Candesartan 32mg once daily and ACE inhibitors                                                                                         | No recommended fixed dose, but investigators were advised of the doses of ACE inhibitors known to reduce morbidity and mortality in patients with congestive heart failure | Unclear | 40.8                         | Follow-up duration | 64      | Mean        | 323                                 | 382                            | 1276                            | 1272                       |
|                                  | Kum 2008         | Irbesartan 300mg and an ACE inhibitor                                                                                                  | Not specified                                                                                                                                                              | Unclear | 12                           | Follow-up duration | 67.5    | Mean        | 4                                   | 7                              | 25                              | 25                         |
|                                  | ValHeFT 2001     | Valsartan 160mg twice daily and an ACE inhibitor                                                                                       | Not specified                                                                                                                                                              | Unclear | 24                           | Follow-up duration | 62.499  | Mean        | 346                                 | 455                            | 2511                            | 2499                       |
|                                  |                  |                                                                                                                                        |                                                                                                                                                                            |         |                              |                    |         |             |                                     |                                |                                 |                            |
| Review author, year, estimate ID | Trials           | Intervention: specific drugs and dosing                                                                                                | Comparator: specific drugs and dosing                                                                                                                                      | Country | Length of follow-up (months) | Follow-up measure  | Age     | Age measure | Number of intervention group events | Number of control group events | Number of intervention patients | Number of control patients |
| Yang, 2015, 8918a                | Isen 1999a       | Antibiotic (Ofloxacin 400 mg orally single dose) or Antibiotic (trimethoprim/sulfonamide methoxazole 160 mg/800 mg orally single dose) | Placebo                                                                                                                                                                    | Turkey  | Unclear                      | Unclear            | Unclear | Unclear     | 0                                   | 3                              | 42                              | 23                         |
|                                  | Kapoor 1998      | Antibiotic (ciprofloxacin 500 mg orally single dose)                                                                                   | Placebo                                                                                                                                                                    | USA     | Unclear                      | Unclear            | Unclear | Unclear     | 1                                   | 4                              | 257                             | 260                        |
|                                  | Isen 1999b       | ATB (ofloxacin 400 mg orally single dose) or ATB (trimethoprim/sulfonamide methoxazole 160 mg/800 mg orally single dose)               | Placebo                                                                                                                                                                    | Turkey  | Unclear                      | Unclear            | Unclear | Unclear     | 0                                   | 3                              | 45                              | 23                         |

**Table S9. Details of GRADE ratings**

| Estimate ID | GRADE provided in review | GRADE rating | Risk of bias | Inconsistency | Indirectness | Imprecision | Publication bias |
|-------------|--------------------------|--------------|--------------|---------------|--------------|-------------|------------------|
| 100c        | No                       | Moderate     | 0            | 0             | 0            | 0           | 0                |
| 593         | Yes                      | Very low     | 0            | 0             | 0            | 0           | 0                |
| 1021        | No                       | Low          | 0            | 0             | 0            | 0           | 0                |
| 1164        | Yes                      | Very low     | 0            | 0             | 0            | 0           | 0                |
| 1264        | No                       | Low          | 0            | 0             | 0            | 0           | 0                |
| 1438a       | Yes                      | Moderate     | 0            | 0             | 0            | 0           | 0                |
| 1606a       | No                       | Low          | 0            | 0             | 0            | 0           | 0                |
| 1629a       | No                       | Moderate     | 0            | 0             | 0            | 0           | 0                |
| 1653a       | No                       | Moderate     | 0            | 0             | 0            | 0           | 0                |
| 1752a       | No                       | Moderate     | 0            | 0             | 0            | 0           | 0                |
| 2159        | Yes                      | Moderate     | 0            | 0             | 0            | 0           | 0                |
| 2599a       | No                       | Moderate     | 0            | 0             | 0            | 0           | 0                |
| 2640b       | No                       | Low          | 0            | 0             | 0            | 0           | 0                |
| 2933a       | Yes                      | Moderate     | 0            | 0             | 0            | 0           | 0                |
| 3275d       | Yes                      | Low          | 0            | 0             | 0            | 0           | 0                |
| 3275e       | Yes                      | Very low     | 0            | 0             | 0            | 0           | 0                |
| 3275l       | Yes                      | Very low     | 0            | 0             | 0            | 0           | 0                |
| 3415        | No                       | High         | 0            | 0             | 0            | 0           | 0                |
| 3639f       | No                       | Low          | 0            | 0             | 0            | 0           | 0                |
| 3640b       | No                       | Low          | 0            | 0             | 0            | 0           | 0                |
| 3640d       | No                       | Low          | 0            | 0             | 0            | 0           | 0                |
| 3657        | No                       | Moderate     | 0            | 0             | 0            | 0           | 0                |
| 3781d       | No                       | Moderate     | 0            | 0             | 0            | 0           | 0                |
| 4002h       | No                       | High         | 0            | 0             | 0            | 0           | 0                |
| 4003a       | Yes                      | Moderate     | 0            | 0             | 0            | 0           | 0                |
| 4003e       | No                       | Low          | 0            | 0             | 0            | 0           | 0                |
| 4004o       | No                       | Low          | 0            | 0             | 0            | 0           | 0                |
| 4004r       | No                       | Low          | 0            | 0             | 0            | 0           | 0                |
| 4004y       | No                       | Low          | 0            | 0             | 0            | 0           | 0                |
| 4004z       | No                       | High         | 0            | 0             | 0            | 0           | 0                |
| 4065a       | No                       | Moderate     | 0            | 0             | 0            | 0           | 0                |
| 4067b       | No                       | Low          | 0            | 0             | 0            | 0           | 0                |
| 4123b       | No                       | Moderate     | 0            | 0             | 0            | 0           | 0                |
| 4123i       | No                       | Moderate     | 0            | 0             | 0            | 0           | 0                |
| 4206a       | No                       | Moderate     | 0            | 0             | 0            | 0           | 0                |
| 4206c       | No                       | Moderate     | 0            | 0             | 0            | 0           | 0                |
| 4260        | No                       | Moderate     | 0            | 0             | 0            | 0           | 0                |
| 4508a       | Yes                      | High         | 0            | 0             | 0            | 0           | 0                |
| 4615d       | No                       | Low          | 0            | 0             | 0            | 0           | 0                |
| 4615e       | No                       | Very Low     | 0            | 0             | 0            | 0           | 0                |
| 4629a       | No                       | Moderate     | 0            | 0             | 0            | 0           | 0                |
| 4812a       | No                       | Low          | 0            | 0             | 0            | 0           | 0                |
| 4838a       | No                       | Low          | 0            | 0             | 0            | 0           | 0                |
| 4838b       | No                       | Moderate     | 0            | 0             | 0            | 0           | 0                |
| 4844        | No                       | Moderate     | 0            | 0             | 0            | 0           | 0                |
| 5371        | No                       | Very Low     | 0            | 0             | 0            | 0           | 0                |
| 5533g       | No                       | Low          | 0            | 0             | 0            | 0           | 0                |
| 5606        | No                       | Moderate     | 0            | 0             | 0            | 0           | 0                |
| 6442a       | Yes                      | Low          | 0            | 0             | 0            | 0           | 0                |
| 6564a       | No                       | Low          | 0            | 0             | 0            | 0           | 0                |
| 6568a       | No                       | Moderate     | 0            | 0             | 0            | 0           | 0                |
| 6670        | No                       | Low          | 0            | 0             | 0            | 0           | 0                |
| 6677        | No                       | Low          | 0            | 0             | 0            | 0           | 0                |



|       |     |          |   |   |    |    |   |
|-------|-----|----------|---|---|----|----|---|
| 6746b | No  | High     | 0 | 0 | 0  | 0  | 0 |
| 6797a | No  | Low      | 0 | 0 | 0  | 0  | 0 |
| 6797b | No  | Low      | 0 | 0 | 0  | 0  | 0 |
| 6797d | No  | Low      | 0 | 0 | 0  | 0  | 0 |
| 6806f | No  | Low      | 0 | 0 | 0  | 0  | 0 |
| 7029b | No  | Moderate | 0 | 0 | 0  | 0  | 0 |
| 7484a | No  | Moderate | 0 | 0 | 0  | 0  | 0 |
| 7504  | No  | Low      | 0 | 0 | 0  | 0  | 0 |
| 8511a | No  | Low      | 0 | 0 | 0  | 0  | 0 |
| 8604b | No  | Low      | 0 | 0 | 0  | 0  | 0 |
| 8604f | No  | Low      | 0 | 0 | 0  | 0  | 0 |
| 8692e | No  | Low      | 0 | 0 | -1 | 0  | 0 |
| 8729a | No  | High     | 0 | 0 | 0  | 0  | 0 |
| 8742a | No  | Low      | 0 | 0 | 0  | 0  | 0 |
| 8744d | No  | Moderate | 0 | 0 | 0  | 0  | 0 |
| 8747a | No  | Low      | 0 | 0 | 0  | 0  | 0 |
| 8747b | No  | Low      | 0 | 0 | 0  | 0  | 0 |
| 8761a | Yes | High     | 0 | 0 | 0  | 0  | 0 |
| 8769b | Yes | Low      | 0 | 0 | 0  | 0  | 0 |
| 8770b | No  | Low      | 0 | 0 | 0  | 0  | 0 |
| 8784a | No  | Low      | 0 | 0 | 0  | 0  | 0 |
| 8790a | No  | Moderate | 0 | 0 | 0  | 0  | 0 |
| 8815a | No  | Low      | 0 | 0 | 0  | 0  | 0 |
| 8817a | No  | Moderate | 0 | 0 | 0  | 0  | 0 |
| 8817d | No  | Low      | 0 | 0 | 0  | 0  | 0 |
| 8817e | No  | Low      | 0 | 0 | 0  | 0  | 0 |
| 8826a | No  | Moderate | 0 | 0 | 0  | 0  | 0 |
| 8829a | No  | Moderate | 0 | 0 | 0  | 0  | 0 |
| 8850a | Yes | High     | 0 | 0 | 0  | 0  | 0 |
| 8867  | Yes | Moderate | 0 | 0 | 0  | 0  | 0 |
| 8884a | No  | Low      | 0 | 0 | -1 | 0  | 0 |
| 8916a | No  | Moderate | 0 | 0 | 0  | 0  | 0 |
| 8916b | No  | Moderate | 0 | 0 | 0  | 0  | 0 |
| 8916c | No  | Moderate | 0 | 0 | 0  | 0  | 0 |
| 8918a | No  | Moderate | 0 | 0 | 0  | 0  | 0 |
| 8918n | No  | Low      | 0 | 0 | 0  | 0  | 0 |
| 8922l | No  | Low      | 0 | 0 | 0  | 0  | 0 |
| 8928  | No  | Very Low | 0 | 0 | 0  | 0  | 0 |
| 8931a | No  | High     | 0 | 0 | 0  | -1 | 0 |
| 8933a | No  | Moderate | 0 | 0 | 0  | 0  | 0 |

## Additional table 9 cont. Risk of bias: domain 1 for downgrading

| Estimate ID | Risk of bias | Justification for rating                                                                                                                                                                                                                                                                                                                                                                                                                                                                                                            | Decision: <i>not serious, serious, very serious</i> | Risk of bias notes |
|-------------|--------------|-------------------------------------------------------------------------------------------------------------------------------------------------------------------------------------------------------------------------------------------------------------------------------------------------------------------------------------------------------------------------------------------------------------------------------------------------------------------------------------------------------------------------------------|-----------------------------------------------------|--------------------|
| 100c        | unclear      | Information on sequence generation and allocation concealment not reported but 75% of trials double blind, all were intention treat, and follow-up was near 100% for all trials.                                                                                                                                                                                                                                                                                                                                                    | Serious                                             |                    |
| 593         | unclear      | Random sequence unclear 66%; allocation concealment unclear 100%; selective reporting unclear 66%, high risk 33%; high risk other bias 100%                                                                                                                                                                                                                                                                                                                                                                                         | Serious                                             |                    |
| 1021        | unclear      | The authors stated that "The overall quality of the trials was high; each followed a double-blinded protocol, and only one study had possible irregularities in the randomization process. Follow-up of randomly assigned patients was almost complete. The only minor methodologic flaw was lack of description of the randomization process in 18 of the 22 trials." It is unclear if allocation concealment was adequate in any of the studies and there was no information on selective reporting.                              | Serious                                             |                    |
| 1164        | high         | Unclear risk for random sequence 3/4; allocation concealment 4/4; blinding 2/4; other bias 1/4. High risk blinding 2/4                                                                                                                                                                                                                                                                                                                                                                                                              | very serious                                        |                    |
| 1264        | unclear      | Sequence generation, allocation concealment, completeness of reporting, and selective reporting unclear in all trials.                                                                                                                                                                                                                                                                                                                                                                                                              | Serious                                             |                    |
| 1438a       | low          | Unclear risk incomplete outcome data 2/4; High risk blinding participants/personnel 1/4                                                                                                                                                                                                                                                                                                                                                                                                                                             | not serious                                         |                    |
| 1606a       | low          | No blinded outcome assessment in one of the two included trials but this is less important for the outcome of hospitalisations and the trial carried little weight in the meta-analysis.                                                                                                                                                                                                                                                                                                                                            | not serious                                         |                    |
| 1629a       | unclear      | All elements unclear for all trials.                                                                                                                                                                                                                                                                                                                                                                                                                                                                                                | Serious                                             |                    |
| 1653a       | unclear      | The authors reported that studies were only eligible if they used a randomisation method with robust allocation concealment. They also report that "most events occurred in a small number of recent trials that used secure randomisation methods and treatment blinding, sensitivity analyses (available on request) indicated that our results were not materially influenced by uncertainties about the quality of older trials. However, they provide little to no actual information on the risk of bias in included studies. | not serious                                         |                    |
| 1752a       | low          | Authors assessed "trials for the adequacy of allocation concealment, blindness of patients and physicians to the treatment, and blind assessment of the outcome of interest". All included studies received 5/5. Authors used completeness of follow-up as an inclusion criteria although "adequate" follow-up not defined.                                                                                                                                                                                                         | not serious                                         |                    |
| 2159        | unclear      | High risk: random sequence 1/5, blinding (ALL) 1/5; Unclear risk: random sequence 1/5, incomplete outcome data 5/5; selective reporting 5/5                                                                                                                                                                                                                                                                                                                                                                                         | not serious                                         |                    |
| 2599a       | unclear      | Newcastle Ottawa scale used but only summary scores were provided as opposed to individual criteria attainment by trial. Only blinding information was available to assess risk of bias. Other source for potential bias is that all included studies came from the same research group, within eight years, and all showed significant reductions in admissions.                                                                                                                                                                   | serious                                             |                    |
| 2640b       | low          | Detailed information relevant for risk of bias assessment were provided.                                                                                                                                                                                                                                                                                                                                                                                                                                                            | not serious                                         |                    |
| 2933a       | low          | Three studies all described in detail central randomisation with adequate allocation concealment. Only one study (Wiktor 1999) had a small number of exclusions following randomisation (7participants out of a total of 771).                                                                                                                                                                                                                                                                                                      | not serious                                         |                    |
| 3275d       | unclear      | unclear risk: for random sequence 3/3, allocation concealment 2/3 and high risk for other biases 3/3; however CHARM-Alternative 2003 contribute 90% = unclear risk for random sequence only but high risk for other biases                                                                                                                                                                                                                                                                                                          | serious                                             |                    |
| 3275e       | unclear      | unclear risk: for random sequence 3/4, allocation concealment 1/4; and high risk for other biases 4/4. Selection bias identified by review authors                                                                                                                                                                                                                                                                                                                                                                                  | serious                                             |                    |
| 3275l       | unclear      | All studies unclear risk for random sequence; 3/4 for allocation concealment; 1/4 unclear for blinding; 1/4 high risk incomplete outcome data and 4/4 high risk other bias                                                                                                                                                                                                                                                                                                                                                          | serious                                             |                    |
| 3415        | low          | Sequence generation unclear in all trials but groups were even at baseline and all other domains were low risk of bias.                                                                                                                                                                                                                                                                                                                                                                                                             | not serious                                         |                    |
| 3639f       | unclear      | Sequence generation, follow-up completeness, and selective reporting unclear in 100% of trials.                                                                                                                                                                                                                                                                                                                                                                                                                                     | serious                                             |                    |
| 3640b       | low          | Inclusion criteria ensured all included trials had double-blinding or patients and care-givers; adequate follow-up completion and outcome reporting. Authors report that all studies had adequate allocation concealment, outcome assessment was blinded, and all were sponsored by pharma.                                                                                                                                                                                                                                         | not serious                                         |                    |

|       |         |                                                                                                                                                                                                                                                                                                                               |              |                                                                                                                                                                                                                                                                                                                                                                                                                   |
|-------|---------|-------------------------------------------------------------------------------------------------------------------------------------------------------------------------------------------------------------------------------------------------------------------------------------------------------------------------------|--------------|-------------------------------------------------------------------------------------------------------------------------------------------------------------------------------------------------------------------------------------------------------------------------------------------------------------------------------------------------------------------------------------------------------------------|
| 3640d | low     | Inclusion criteria ensured all included trials had double-blinding or patients and care-givers; adequate follow-up completion and outcome reporting. Authors report that all studies had adequate allocation concealment, outcome assessment was blinded, and all were sponsored by pharma.                                   | not serious  |                                                                                                                                                                                                                                                                                                                                                                                                                   |
| 3657  | unclear | No blinding in 1 of the 2 included trials although low risk of bias otherwise.                                                                                                                                                                                                                                                | serious      |                                                                                                                                                                                                                                                                                                                                                                                                                   |
| 3781d | unclear | Sequence generation, concealment, and selective reporting unclear in all trials.                                                                                                                                                                                                                                              | serious      |                                                                                                                                                                                                                                                                                                                                                                                                                   |
| 4002h | low     |                                                                                                                                                                                                                                                                                                                               | not serious  |                                                                                                                                                                                                                                                                                                                                                                                                                   |
| 4003a |         |                                                                                                                                                                                                                                                                                                                               |              |                                                                                                                                                                                                                                                                                                                                                                                                                   |
| 4003e | unclear | Allocation concealment unclear in 83% of trials.                                                                                                                                                                                                                                                                              | serious      |                                                                                                                                                                                                                                                                                                                                                                                                                   |
| 4004o | high    | Allocation concealment unclear in both studies. High risk of bias for incomplete outcome reporting in one trial: high rate of drop outs. Both industry funded.                                                                                                                                                                | serious      |                                                                                                                                                                                                                                                                                                                                                                                                                   |
| 4004r | high    | 43% of trials had high drop out rates relative to event rates. All industry funded. 71% of trials had unclear allocation concealment methods.                                                                                                                                                                                 | serious      |                                                                                                                                                                                                                                                                                                                                                                                                                   |
| 4004z | high    | All trials industry funded. Allocation concealment unclear in 62% of trials although these trials received little weight in the meta-analysis.                                                                                                                                                                                | not serious  | Not downgraded because bias that may affect the outcome occurred in studies that represent a small weight in the overall analysis and the effect estimates span both directions (reductions/increases in admissions).                                                                                                                                                                                             |
| 4004y | unclear | Allocation concealment unclear in 80% of trials.                                                                                                                                                                                                                                                                              | serious      |                                                                                                                                                                                                                                                                                                                                                                                                                   |
| 4065a | unclear | Sequence generation, allocation concealment, incomplete outcome assessment, and selective reporting unclear in all trials. 50% of trials were unblinded. Funding unclear for all studies.                                                                                                                                     | serious      |                                                                                                                                                                                                                                                                                                                                                                                                                   |
| 4067b | unclear | Sequence generation, allocation concealment, completeness of outcome assessment, and reporting bias unclear in all trials.                                                                                                                                                                                                    | serious      |                                                                                                                                                                                                                                                                                                                                                                                                                   |
| 4123b | high    | Very high attrition in both trials (greater than 75%)                                                                                                                                                                                                                                                                         | serious      |                                                                                                                                                                                                                                                                                                                                                                                                                   |
| 4123i | high    | Very high attrition in both trials (greater than 75%)                                                                                                                                                                                                                                                                         | serious      |                                                                                                                                                                                                                                                                                                                                                                                                                   |
| 4206a | unclear | No blinding in 33% of studies. Sequence generation unclear in all trials.                                                                                                                                                                                                                                                     | serious      |                                                                                                                                                                                                                                                                                                                                                                                                                   |
| 4206c | unclear | Sequence generation unclear in all trials. Selective reporting unclear in all trials.                                                                                                                                                                                                                                         | serious      |                                                                                                                                                                                                                                                                                                                                                                                                                   |
| 4260  | low     |                                                                                                                                                                                                                                                                                                                               | not serious  |                                                                                                                                                                                                                                                                                                                                                                                                                   |
| 4508a |         |                                                                                                                                                                                                                                                                                                                               |              |                                                                                                                                                                                                                                                                                                                                                                                                                   |
| 4615d | high    | Sequence generation unclear in 50% of trials. Allocation concealment inadequate in 40% of trials. No blinding in 50% of trials. Completeness of outcome data and selective reporting unclear in all trials.                                                                                                                   | serious      |                                                                                                                                                                                                                                                                                                                                                                                                                   |
| 4615e | high    | Sequence generation unclear in 50% of trials. Allocation concealment high risk of bias in 50% of trials. No blinding in 67% of trials. Completeness of outcome data and selective reporting unclear in all trials.                                                                                                            | very serious |                                                                                                                                                                                                                                                                                                                                                                                                                   |
| 4629a | unclear | Allocation concealment and selective reporting unclear in all trials. All other elements unclear in 50% of the trials.                                                                                                                                                                                                        | serious      |                                                                                                                                                                                                                                                                                                                                                                                                                   |
| 4812a | unclear | Allocation concealment unclear in 33% of studies. Blinding unclear in 66% of studies.                                                                                                                                                                                                                                         | serious      |                                                                                                                                                                                                                                                                                                                                                                                                                   |
| 4838a | low     | Authors used Cochrane criteria to assess risk of bias. All included trials had adequate sequence generation, allocation concealment, and had blinding of patients, providers, and outcome assessors. Incomplete outcome data and selective reporting results not reported although all trials deemed low risk by the authors. | not serious  | "The criteria used for quality assessment were sequence generation of allocation; allocation concealment; masking of participants, staff, and outcome assessors; incomplete outcome data; selective outcome reporting; and other sources of bias, as recommended by the Cochrane Collaboration. We classed studies with high or unclear risk of bias for any of the first three components to be of low quality." |
| 4838b | low     | Authors used Cochrane criteria to assess risk of bias. All included trials had adequate sequence generation, allocation concealment, and had blinding of patients, providers, and outcome assessors. Incomplete outcome data and selective reporting results not reported although all trials deemed low risk by the authors. | not serious  | "The criteria used for quality assessment were sequence generation of allocation; allocation concealment; masking of participants, staff, and outcome assessors; incomplete outcome data; selective outcome reporting; and other sources of bias, as recommended by the Cochrane Collaboration. We classed                                                                                                        |

|       |         |                                                                                                                                                                                                                                                   |              |                                                                                                        |
|-------|---------|---------------------------------------------------------------------------------------------------------------------------------------------------------------------------------------------------------------------------------------------------|--------------|--------------------------------------------------------------------------------------------------------|
|       |         |                                                                                                                                                                                                                                                   |              | studies with high or unclear risk of bias for any of the first three components to be of low quality." |
| 4844  | high    | No blinding in 33% of trials. One trial used date of birth for "randomisation". Allocation concealment in the other 66% of trials.                                                                                                                | serious      |                                                                                                        |
| 5371  | unclear | JADAD score used. Neither trial was double blinded (unclear if single blinded) and allocation concealment unclear in both. All other criteria relevant for risk of bias unclear.                                                                  | serious      |                                                                                                        |
| 5533g | high    | Large drop out rates in 50% of trials. Sequence generation, concealment, completeness of follow-up, and selective reporting unclear in 50% of trials                                                                                              | serious      |                                                                                                        |
| 5606  | low     | Sequence generation and allocation concealment unclear in 44% of studies. No blinding in 33% of studies. Selective reporting bias in 33% of studies. However, studies with low risk of bias had the majority of weighting in meta-analysis.       | not serious  |                                                                                                        |
| 6442a |         |                                                                                                                                                                                                                                                   |              |                                                                                                        |
| 6564a | unclear | Quality scores given but no descriptive information on criteria to assess risk of bias.                                                                                                                                                           | serious      |                                                                                                        |
| 6568a | unclear | Allocation concealment and selective reporting unclear for all trials. Sequence generation and completeness of follow-up unclear in 80% of trials.                                                                                                | serious      |                                                                                                        |
| 6670  | unclear | Allocation concealment and selective reporting unclear in all trials.                                                                                                                                                                             | serious      |                                                                                                        |
| 6677  | unclear | Allocation concealment, completeness of follow-up, and selective reporting unclear in all trials.                                                                                                                                                 | serious      |                                                                                                        |
| 6746b | low     |                                                                                                                                                                                                                                                   | not serious  |                                                                                                        |
| 6797a | unclear | Sequence generation, allocation concealment, and selective reporting unclear in all trials.                                                                                                                                                       | serious      |                                                                                                        |
| 6797b | unclear | Sequence generation, allocation concealment, and selective reporting unclear in all trials.                                                                                                                                                       | serious      |                                                                                                        |
| 6797d | unclear | Sequence generation, allocation concealment, and selective reporting unclear in all trials.                                                                                                                                                       | serious      |                                                                                                        |
| 6806f | high    | High risk of selective reporting bias in 83% of trials. Allocation concealment unclear in 83% of trials and high risk of bias in remaining 17% of trials. High risk of bias regarding blinding in 50% of trials.                                  | very serious |                                                                                                        |
| 7029b | unclear | Allocation concealment and selective reporting unclear in all trials.                                                                                                                                                                             | serious      |                                                                                                        |
| 7484a | high    | No blinding in 83% of studies. Information on selective reporting unclear in all trials.                                                                                                                                                          | serious      |                                                                                                        |
| 7504  | unclear | Allocation concealment, completeness of follow-up, and selective reporting unclear in 100% of trials                                                                                                                                              | serious      |                                                                                                        |
| 8511a | unclear | Risk of bias for sequence generation, allocation concealment, completeness of follow-up, selective reporting unclear in all but one study.                                                                                                        | serious      |                                                                                                        |
| 8604b | high    | 73% of studies did not have adequate allocation concealment. Random sequence generation was unclear in 64% of studies. No blinding in 36% of studies. 45% of studies did not account for withdrawals and did not use intention to treat analysis. | serious      |                                                                                                        |
| 8604f | high    | 86% of studies did not have adequate allocation concealment. No blinding in 43% of studies. Reasons for withdrawals not reported in 57% of studies.                                                                                               | very serious |                                                                                                        |
| 8692e | low     |                                                                                                                                                                                                                                                   | not serious  |                                                                                                        |
| 8729a | low     |                                                                                                                                                                                                                                                   | not serious  |                                                                                                        |
| 8742a | unclear | Allocation concealment, completeness of follow-up, and selective reporting unclear in all trials.                                                                                                                                                 | serious      |                                                                                                        |
| 8744d | low     |                                                                                                                                                                                                                                                   | not serious  |                                                                                                        |
| 8747a | unclear | Domains unclear for all trials.                                                                                                                                                                                                                   | serious      |                                                                                                        |
| 8747b | unclear | Domains unclear for all trials.                                                                                                                                                                                                                   | serious      |                                                                                                        |
| 8769b |         |                                                                                                                                                                                                                                                   |              |                                                                                                        |
| 8770b | high    | 29% of studies had inadequate sequence generation, allocation concealment, and blinding. One study had high risk of bias for incomplete reporting.                                                                                                | serious      |                                                                                                        |
| 8784a | high    | No blinding in 50% of studies. High loss to follow up in 50% of studies.                                                                                                                                                                          | serious      |                                                                                                        |
| 8790a | low     |                                                                                                                                                                                                                                                   | not serious  |                                                                                                        |
| 8815a | high    | No blinding in any of the included trials. Allocation concealment unclear in 56% of trials. Adequate sequence generation unclear in 66% of trials.                                                                                                | serious      |                                                                                                        |
| 8817a | low     |                                                                                                                                                                                                                                                   | not serious  |                                                                                                        |

|       |         |                                                                                                                                                                         |             |  |
|-------|---------|-------------------------------------------------------------------------------------------------------------------------------------------------------------------------|-------------|--|
| 8817d | low     |                                                                                                                                                                         | not serious |  |
| 8817e | low     |                                                                                                                                                                         | not serious |  |
| 8826a | unclear | Allocation concealment unclear in all trials. Adequacy of sequence generation unclear in 88% of studies. Blinding unclear in 33% of studies.                            | serious     |  |
| 8829a | unclear | Adequacy of sequence generation, allocation concealment, completeness of follow-up, and selective reporting unclear in both trials.                                     | serious     |  |
| 8850a |         |                                                                                                                                                                         |             |  |
| 8867  |         |                                                                                                                                                                         |             |  |
| 8884a | unclear | No blinding in 50% of trials. All elements unclear for other domains.                                                                                                   | serious     |  |
| 8916a | unclear | Allocation concealment unclear in all trials.                                                                                                                           | serious     |  |
| 8916b | unclear | Sequence generation and allocation concealment unclear 50% of trials. All other elements low risk of bias.                                                              | serious     |  |
| 8916c | unclear | Sequence generation and allocation concealment unclear 75% of trials. All other elements low risk of bias.                                                              | serious     |  |
| 8918n | high    | No blinding in 66% of studies. Allocation concealment unclear in 66% of studies.                                                                                        | serious     |  |
| 8918a | low     |                                                                                                                                                                         | not serious |  |
| 8922l | unclear | Allocation concealment unclear in all studies. Sequence generation unclear in 43% of studies. Completeness of follow-up and selective reporting unclear in all studies. | serious     |  |
| 8928  | unclear | Sequence generation, allocation concealment, completeness of follow-up, selective reporting unclear for all studies.                                                    | serious     |  |
| 8931a | low     |                                                                                                                                                                         | not serious |  |
| 8933a | low     |                                                                                                                                                                         | not serious |  |

**Table S9 cont. Inconsistency: domain 2 for downgrading**

| Estimate ID | Large variations in the size of effect | Overlap of confidence intervals     | Statistical significance of heterogeneity (p<0.1) | I-squared: small (0-39%) medium (40-74%) large (>75%) | Decision: <i>not serious, serious, very serious</i> | Inconsistency notes |
|-------------|----------------------------------------|-------------------------------------|---------------------------------------------------|-------------------------------------------------------|-----------------------------------------------------|---------------------|
| 100c        | no                                     | yes                                 | no                                                | small                                                 | not serious                                         |                     |
| 593         | yes                                    | yes                                 | no                                                | small                                                 | not serious                                         |                     |
| 1021        | yes                                    | no                                  | unclear                                           | unclear                                               | serious                                             |                     |
| 1164        | yes                                    | no                                  | yes                                               | medium                                                | serious                                             |                     |
| 1264        | no                                     | unclear                             | no                                                | small                                                 | not serious                                         |                     |
| 1438a       | yes                                    | yes                                 | no                                                | small                                                 | not serious                                         |                     |
| 1606a       | yes                                    | no                                  | yes                                               | large                                                 | serious                                             |                     |
| 1629a       | no                                     | yes                                 | no                                                | small                                                 | not serious                                         |                     |
| 1653a       | unclear                                | unclear (forrest plot not provided) | unclear                                           | unclear                                               | serious                                             |                     |
| 1752a       | no                                     | yes                                 | no                                                | unclear                                               | not serious                                         |                     |
| 2159        | no                                     | yes                                 | no                                                | small                                                 | not serious                                         |                     |
| 2599a       | yes                                    | yes                                 | no                                                | medium                                                | not serious                                         |                     |
| 2640b       | unclear                                | unclear                             | unclear                                           | unclear                                               | serious                                             |                     |
| 2933a       | yes                                    | yes                                 | no                                                | small                                                 | not serious                                         |                     |
| 3275d       | no                                     | yes                                 | no                                                | small                                                 | not serious                                         |                     |
| 3275e       | yes                                    | yes                                 | no                                                | small                                                 | not serious                                         |                     |
| 3275l       | yes                                    | yes                                 | no                                                | small                                                 | not serious                                         |                     |
| 3415        | no                                     | yes                                 | no                                                | small                                                 | not serious                                         |                     |
| 3639f       | no                                     | yes                                 | no                                                | small                                                 | not serious                                         |                     |
| 3640b       | unclear                                | unclear                             | no                                                | unclear                                               | not serious                                         |                     |
| 3640d       | unclear                                | unclear                             | no                                                | unclear                                               | not serious                                         |                     |
| 3657        | unclear                                | unclear                             | no                                                | unclear                                               | not serious                                         |                     |
| 3781d       | no                                     | yes                                 | no                                                | unclear                                               | not serious                                         |                     |
| 4002h       | no                                     | yes                                 | no                                                | small                                                 | not serious                                         |                     |
| 4003a       |                                        |                                     |                                                   |                                                       |                                                     |                     |
| 4003e       | no                                     | yes                                 | no                                                | small                                                 | not serious                                         |                     |
| 4004o       | no                                     | yes                                 | no                                                | small                                                 | not serious                                         |                     |
| 4004r       | yes                                    | yes                                 | no                                                | small                                                 | not serious                                         |                     |
| 4004y       | yes                                    | yes                                 | no                                                | small                                                 | not serious                                         |                     |
| 4004z       | yes                                    | yes                                 | no                                                | small                                                 | not serious                                         |                     |
| 4065a       | no                                     | yes                                 | no                                                | small                                                 | not serious                                         |                     |
| 4067b       | no                                     | yes                                 | no                                                | small                                                 | not serious                                         |                     |
| 4123b       | no                                     | yes                                 | no                                                | small                                                 | not serious                                         |                     |
| 4123i       | no                                     | yes                                 | no                                                | small                                                 | not serious                                         |                     |
| 4206a       | no                                     | yes                                 | yes                                               | medium                                                | not serious                                         |                     |
| 4206c       | unclear                                | 0                                   | no                                                | small                                                 | not serious                                         |                     |
| 4260        | no                                     | yes                                 | no                                                | small                                                 | not serious                                         |                     |
| 4508a       |                                        |                                     |                                                   |                                                       |                                                     |                     |

|       |         |         |         |         |             |
|-------|---------|---------|---------|---------|-------------|
| 4615d | yes     | no      | yes     | medium  | serious     |
| 4615e | no      | yes     | no      | small   | not serious |
| 4629a | no      | yes     | no      | small   | not serious |
| 4812a | no      | no      | yes     | large   | serious     |
| 4838a | no      | yes     | yes     | medium  | serious     |
| 4838b | no      | yes     | yes     | medium  | serious     |
| 4844  | no      | no      | no      | small   | not serious |
| 5371  | unclear | unclear | unclear | unclear | serious     |
| 5533g | no      | yes     | no      | small   | not serious |
| 5606  | yes     | yes     | no      | small   | not serious |
| 6442a |         |         |         |         |             |
| 6564a | yes     | yes     | no      | unclear | not serious |
| 6568a | yes     | yes     | no      | small   | not serious |
| 6670  | unclear | unclear | unclear | unclear | serious     |
| 6677  | no      | yes     | no      | small   | not serious |
| 6746b | unclear | unclear | no      | unclear | not serious |
| 6797a | no      | yes     | no      | small   | not serious |
| 6797b | unclear | unclear | unclear | unclear | serious     |
| 6797d | no      | yes     | no      | small   | not serious |
| 6806f | yes     | yes     | no      | small   | not serious |
| 7029b | unclear | unclear | no      | small   | not serious |
| 7484a | no      | yes     | unclear | unclear | not serious |
| 7504  | no      | yes     | no      | small   | not serious |
| 8511a | yes     | yes     | yes     | small   | not serious |
| 8604b | yes     | no      | no      | small   | not serious |
| 8604f | unclear | unclear | no      | small   | not serious |
| 8692e | no      | no      | no      | small   | not serious |
| 8729a | yes     | yes     | no      | small   | not serious |
| 8742a | no      | yes     | no      | small   | not serious |
| 8744d | no      | yes     | no      | small   | not serious |
| 8747a | yes     | yes     | no      | small   | not serious |
| 8747b | no      | yes     | no      | small   | not serious |
| 8769b |         |         |         |         |             |
| 8770b | yes     | yes     | no      | small   | not serious |
| 8784a | no      | yes     | no      | small   | not serious |
| 8790a | no      | yes     | no      | small   | not serious |
| 8815a | no      | yes     | no      | small   | not serious |
| 8817a | yes     | yes     | no      | small   | not serious |
| 8817d | yes     | no      | yes     | medium  | serious     |
| 8817e | yes     | no      | yes     | medium  | serious     |
| 8826a | yes     | yes     | no      | small   | not serious |
| 8829a | no      | yes     | no      | small   | not serious |
| 8850a |         |         |         |         |             |
| 8867  |         |         |         |         |             |
| 8884a | no      | yes     | no      | small   | not serious |

|       |         |         |         |         |             |  |
|-------|---------|---------|---------|---------|-------------|--|
| 8916a | no      | yes     | no      | small   | not serious |  |
| 8916b | no      | yes     | no      | small   | not serious |  |
| 8916c | no      | yes     | no      | small   | not serious |  |
| 8918a | no      | yes     | no      | small   | not serious |  |
| 8918n | unclear | unclear | no      | small   | not serious |  |
| 8922l | unclear | unclear | no      | small   | not serious |  |
| 8928  | no      | yes     | no      | small   | not serious |  |
| 8931a | no      | yes     | unclear | unclear | not serious |  |
| 8933a | yes     | yes     | no      | small   | not serious |  |



**Table S9 cont. Indirectness: domain 3 for downgrading.**

| Estimate ID | Direct comparison (A vs. B, not network analysis) | Patients                                                          | Interventions                                                                                 | Comparator                               | Outcome                                                                                     | Majority OECD countries | Decision: <i>no indirectness, serious indirectness, very serious indirectness</i> | Indirectness notes |
|-------------|---------------------------------------------------|-------------------------------------------------------------------|-----------------------------------------------------------------------------------------------|------------------------------------------|---------------------------------------------------------------------------------------------|-------------------------|-----------------------------------------------------------------------------------|--------------------|
| 100c        | yes                                               | no (previous use of statins varied from 0% to 76% between trials) | yes                                                                                           | yes                                      | yes                                                                                         | Yes                     | no indirectness                                                                   |                    |
| 593         | yes                                               | yes                                                               | No, different interventions drugs                                                             | yes                                      | yes                                                                                         | Yes                     | no indirectness                                                                   |                    |
| 1021        | yes                                               | yes                                                               | yes                                                                                           | yes                                      | yes                                                                                         | Yes                     | no indirectness                                                                   |                    |
| 1164        | yes                                               | yes                                                               | No, different drugs/doses/number of interventions used across studies                         | No, different comparators/doses used     | yes                                                                                         | Yes                     | no indirectness                                                                   |                    |
| 1264        | yes                                               | yes                                                               | yes                                                                                           | yes                                      | Yes                                                                                         | Yes                     | no indirectness                                                                   |                    |
| 1438a       | yes                                               | yes                                                               | yes                                                                                           | No, different comparators/doses          | yes                                                                                         | Yes                     | no indirectness                                                                   |                    |
| 1606a       | yes                                               | yes                                                               | no (one rhythm control drug used in one study and a variety of drugs used in the other trial) | yes                                      | no (one rate control drug used in one trial and a variety of drugs used in the other trial) | Yes                     | serious indirectness                                                              |                    |
| 1629a       | yes                                               | yes                                                               | yes                                                                                           | yes                                      | yes                                                                                         | Yes                     | no indirectness                                                                   |                    |
| 1653a       | yes                                               | yes                                                               | yes                                                                                           | yes                                      | yes                                                                                         | Yes                     | no indirectness                                                                   |                    |
| 1752a       | yes                                               | yes                                                               | yes                                                                                           | yes                                      | yes                                                                                         | Yes                     | no indirectness                                                                   |                    |
| 2159        | yes                                               | yes                                                               | no, different interventions across studies                                                    | no, different comparators across studies | yes                                                                                         | Yes                     | no indirectness                                                                   |                    |
| 2599a       | yes                                               | yes                                                               | yes                                                                                           | yes                                      | yes                                                                                         | Yes                     | no indirectness                                                                   |                    |
| 2640b       | yes                                               | yes                                                               | yes                                                                                           | yes                                      | yes                                                                                         | Yes                     | no indirectness                                                                   |                    |
| 2933a       | yes                                               | yes                                                               | No, 2/3 same dose, 1/3 half-dose                                                              | yes                                      | yes                                                                                         | Yes                     | no indirectness                                                                   |                    |

|       |     |                                 |                                   |                                                                                                                                |                                                                                                                        |     |                      |  |
|-------|-----|---------------------------------|-----------------------------------|--------------------------------------------------------------------------------------------------------------------------------|------------------------------------------------------------------------------------------------------------------------|-----|----------------------|--|
| 3275d | yes | no, different severities of CHF | no, different doses used          | yes                                                                                                                            | no, review does not state outcome was assessed (SPICE 2000). However, only contributes 4.6% to overall pooled estimate | Yes | no indirectness      |  |
| 3275e | yes | no, different severities of CHF | no, different doses used          | yes                                                                                                                            | no, review does not state outcome was assessed (SPICE 2000). However, only contributes 0.4% to overall pooled estimate | Yes | no indirectness      |  |
| 3275l | yes | no, different severities of CHF | no, different doses in all 3 arms | unclear: insufficient info on ACEI therapy regimen or placebo used. Placebo used alongside ACEi in some studies but not others | yes                                                                                                                    | Yes | serious indirectness |  |
| 3415  | yes | yes                             | yes                               | yes                                                                                                                            | yes                                                                                                                    | Yes | no indirectness      |  |
| 3639f | yes | yes                             | yes                               | yes                                                                                                                            | yes                                                                                                                    | Yes | no indirectness      |  |
| 3640b | yes | yes                             | yes                               | yes                                                                                                                            | yes                                                                                                                    | Yes | no indirectness      |  |
| 3640d | yes | yes                             | yes                               | yes                                                                                                                            | yes                                                                                                                    | Yes | no indirectness      |  |
| 3657  | yes | yes                             | yes                               | yes                                                                                                                            | yes                                                                                                                    | Yes | no indirectness      |  |
| 3781d | yes | yes                             | yes                               | yes                                                                                                                            | yes                                                                                                                    | Yes | no indirectness      |  |
| 4002h | yes | yes                             | yes                               | yes                                                                                                                            | yes                                                                                                                    | Yes | no indirectness      |  |
| 4003a |     |                                 |                                   |                                                                                                                                |                                                                                                                        |     |                      |  |
| 4003e | yes | yes                             | yes                               | yes                                                                                                                            | yes                                                                                                                    | Yes | no indirectness      |  |
| 4004o | yes | yes                             | yes                               | yes                                                                                                                            | yes                                                                                                                    | Yes | no indirectness      |  |
| 4004r | yes | yes                             | yes                               | yes                                                                                                                            | yes                                                                                                                    | Yes | no indirectness      |  |
| 4004y | yes | yes                             | yes                               | yes                                                                                                                            | yes                                                                                                                    | Yes | no indirectness      |  |
| 4004z | yes | yes                             | yes                               | yes                                                                                                                            | yes                                                                                                                    | Yes | no indirectness      |  |
| 4065a | yes | yes                             | yes                               | yes                                                                                                                            | yes                                                                                                                    | Yes | no indirectness      |  |

|       |     |     |     |     |     |     |                      |
|-------|-----|-----|-----|-----|-----|-----|----------------------|
| 4067b | yes | yes | yes | yes | yes | Yes | no indirectness      |
| 4123b | yes | yes | yes | yes | yes | Yes | no indirectness      |
| 4123i | yes | yes | yes | yes | yes | Yes | no indirectness      |
| 4206a | yes | yes | yes | yes | yes | Yes | no indirectness      |
| 4206c | yes | yes | yse | yes | yes | Yes | no indirectness      |
| 4260  | yes | yes | yes | yes | yes | Yes | no indirectness      |
| 4508a |     |     |     |     |     |     |                      |
| 4615d | yes | yes | yes | yes | yes | Yes | no indirectness      |
| 4615e | yes | yes | yes | yes | yes | Yes | no indirectness      |
| 4629a | yes | yes | yes | yes | yes | Yes | no indirectness      |
| 4812a | yes | yes | yes | yes | yes | Yes | no indirectness      |
| 4838a | yes | yes | yes | yes | yes | Yes | no indirectness      |
| 4838b | yes | yes | yes | yes | yes | Yes | no indirectness      |
| 4844  | yes | yes | yes | yes | yes | Yes | no indirectness      |
| 5371  | yes | yes | yes | yes | yes | Yes | no indirectness      |
| 5533g | yes | yes | yes | yes | yes | Yes | no indirectness      |
| 5606  | yes | yes | yes | yes | yes | Yes | no indirectness      |
| 6442a |     |     |     |     |     |     |                      |
| 6564a | yes | yes | yes | yes | yes | Yes | no indirectness      |
| 6568a | yes | yes | yes | yes | yes | Yes | no indirectness      |
| 6670  | yes | yes | yes | yes | yes | Yes | no indirectness      |
| 6677  | yes | yes | yes | yes | yes | Yes | no indirectness      |
| 6746b | yes | yes | yes | yes | yes | Yes | no indirectness      |
| 6797a | yes | yes | yes | yes | yes | Yes | no indirectness      |
| 6797b | yes | yes | yes | yes | yes | Yes | no indirectness      |
| 6797d | yes | yes | yes | yes | yes | Yes | no indirectness      |
| 6806f | yes | yes | yes | yes | yes | Yes | no indirectness      |
| 7029b | yes | yes | yes | yes | yes | Yes | no indirectness      |
| 7484a | yes | yes | yes | yes | yes | Yes | no indirectness      |
| 7504  | yes | yes | yes | yes | yes | Yes | no indirectness      |
| 8511a | yes | yes | yes | yes | yes | Yes | no indirectness      |
| 8604b | yes | yes | yes | yes | yes | Yes | no indirectness      |
| 8604f | yes | yes | yes | yes | yes | Yes | no indirectness      |
| 8692e | yes | yes | yes | yes | yes | No  | Serious indirectness |
| 8729a | yes | yes | yes | yes | yes | Yes | no indirectness      |
| 8742a | yes | yes | yes | yes | yes | Yes | no indirectness      |
| 8744d | yes | yes | yes | yes | yes | Yes | no indirectness      |
| 8747a | yes | yes | yes | yes | yes | Yes | no indirectness      |
| 8747b | yes | yes | yes | yes | yes | Yes | no indirectness      |
| 8769b |     |     |     |     |     |     |                      |
| 8770b | yes | yes | yes | yes | yes | Yes | no indirectness      |
| 8784a | yes | yes | yes | yes | yes | Yes | no indirectness      |
| 8790a | yes | yes | yes | yes | yes | Yes | no indirectness      |
| 8815a | yes | yes | yes | yes | yes | Yes | no indirectness      |

|       |     |     |     |     |     |     |                      |  |
|-------|-----|-----|-----|-----|-----|-----|----------------------|--|
| 8817a | yes | yes | yes | yes | yes | Yes | no indirectness      |  |
| 8817d | yes | yes | yes | yes | yes | Yes | no indirectness      |  |
| 8817e | yes | yes | yes | yes | yes | Yes | no indirectness      |  |
| 8826a | yes | yes | yes | yes | yes | Yes | no indirectness      |  |
| 8829a | yes | yes | yes | yes | yes | Yes | no indirectness      |  |
| 8850a |     |     |     |     |     |     |                      |  |
| 8867  |     |     |     |     |     |     |                      |  |
| 8884a | yes | yes | yes | yes | yes | No  | Serious indirectness |  |
| 8916a | yes | yes | yes | yes | yes | Yes | no indirectness      |  |
| 8916b | yes | yes | yes | yes | yes | Yes | no indirectness      |  |
| 8916c | yes | yes | yes | yes | yes | Yes | no indirectness      |  |
| 8918a | yes | yes | yes | yes | yes | Yes | no indirectness      |  |
| 8918n | yes | yes | yes | yes | yes | Yes | no indirectness      |  |
| 8922l | yes | yes | yes | yes | yes | Yes | no indirectness      |  |
| 8928  | yes | yes | yes | yes | yes | Yes | no indirectness      |  |
| 8931a | yes | yes | yes | yes | yes | Yes | no indirectness      |  |
| 8933a | yes | yes | yes | yes | yes | Yes | no indirectness      |  |

**Table S9 cont. Imprecision: domain 4 for downgrading**

| Estimate ID | Does the 95% CI include the null effect and appreciable benefit/harm? | Does the 95% CI include a trivial effect and appreciable benefit/harm? | Meets the optimal information size | Decision: <i>not serious, serious, very serious</i> | Imprecision notes |
|-------------|-----------------------------------------------------------------------|------------------------------------------------------------------------|------------------------------------|-----------------------------------------------------|-------------------|
| 100c        | no                                                                    | no                                                                     | yes                                | not serious                                         |                   |
| 593         | no                                                                    | no                                                                     | yes                                | not serious                                         |                   |
| 1021        | no                                                                    | no                                                                     | yes                                | not serious                                         |                   |
| 1164        | no                                                                    | yes                                                                    | yes                                | serious                                             |                   |
| 1264        | no                                                                    | no                                                                     | no                                 | serious                                             |                   |
| 1438a       | no                                                                    | yes                                                                    | yes                                | serious                                             |                   |
| 1606a       | no                                                                    | no                                                                     | yes                                | not serious                                         |                   |
| 1629a       | no                                                                    | no                                                                     | yes                                | not serious                                         |                   |
| 1653a       | no                                                                    | no                                                                     | yes                                | not serious                                         |                   |
| 1752a       | no                                                                    | no                                                                     | no                                 | serious                                             |                   |
| 2159        | no                                                                    | no                                                                     | yes                                | not serious                                         |                   |
| 2599a       | no                                                                    | no                                                                     | yes                                | not serious                                         |                   |
| 2640b       | no                                                                    | no                                                                     | yes                                | not serious                                         |                   |
| 2933a       | no                                                                    | no                                                                     | yes                                | not serious                                         |                   |
| 3275d       | no                                                                    | no                                                                     | yes                                | not serious                                         |                   |
| 3275e       | no                                                                    | yes                                                                    | yes                                | serious                                             |                   |
| 3275l       | no                                                                    | no                                                                     | yes                                | not serious                                         |                   |
| 3415        | no                                                                    | no                                                                     | yes                                | not serious                                         |                   |
| 3639f       | no                                                                    | no                                                                     | no                                 | serious                                             |                   |
| 3640b       | no                                                                    | no                                                                     | no                                 | serious                                             |                   |
| 3640d       | no                                                                    | no                                                                     | no                                 | serious                                             |                   |
| 3657        | no                                                                    | no                                                                     | yes                                | not serious                                         |                   |
| 3781d       | no                                                                    | no                                                                     | yes                                | not serious                                         |                   |
| 4002h       | no                                                                    | no                                                                     | yes                                | not serious                                         |                   |
| 4003a       |                                                                       |                                                                        |                                    |                                                     |                   |
| 4003e       | no                                                                    | yes                                                                    | yes                                | serious                                             |                   |
| 4004o       | no                                                                    | no                                                                     | no                                 | serious                                             |                   |
| 4004r       | no                                                                    | no                                                                     | no                                 | serious                                             |                   |
| 4004y       | no                                                                    | no                                                                     | no                                 | serious                                             |                   |
| 4004z       | no                                                                    | no                                                                     | yes                                | not serious                                         |                   |
| 4065a       | no                                                                    | no                                                                     | yes                                | not serious                                         |                   |
| 4067b       | no                                                                    | yes                                                                    | no                                 | serious                                             |                   |
| 4123b       | no                                                                    | no                                                                     | yes                                | not serious                                         |                   |
| 4123i       | no                                                                    | no                                                                     | yes                                | not serious                                         |                   |
| 4206a       | no                                                                    | no                                                                     | yes                                | not serious                                         |                   |
| 4206c       | no                                                                    | no                                                                     | yes                                | not serious                                         |                   |
| 4260        | no                                                                    | no                                                                     | no                                 | serious                                             |                   |
| 4508a       |                                                                       |                                                                        |                                    |                                                     |                   |
| 4615d       | no                                                                    | no                                                                     | yes                                | not serious                                         |                   |

|       |    |     |     |             |
|-------|----|-----|-----|-------------|
| 4615e | no | no  | no  | serious     |
| 4629a | no | no  | yes | not serious |
| 4812a | no | no  | yes | not serious |
| 4838a | no | no  | no  | serious     |
| 4838b | no | no  | yes | not serious |
| 4844  | no | no  | yes | not serious |
| 5371  | no | no  | no  | serious     |
| 5533g | no | no  | no  | serious     |
| 5606  | no | no  | yes | not serious |
| 6442a |    |     |     |             |
| 6564a | no | yes | no  | serious     |
| 6568a | no | no  | yes | not serious |
| 6670  | no | no  | yes | not serious |
| 6677  | no | no  | no  | not serious |
| 6746b | no | no  | yes | not serious |
| 6797a | no | no  | no  | serious     |
| 6797b | no | no  | yes | not serious |
| 6797d | no | no  | no  | serious     |
| 6806f | no | no  | yes | not serious |
| 7029b | no | no  | yes | not serious |
| 7484a | no | no  | yes | not serious |
| 7504  | no | no  | no  | serious     |
| 8511a | no | yes | no  | serious     |
| 8604b | no | yes | yes | serious     |
| 8604f | no | no  | yes | no serious  |
| 8692e | no | yes | no  | serious     |
| 8729a | no | no  | yes | not serious |
| 8742a | no | yes | no  | serious     |
| 8744d | no | yes | no  | serious     |
| 8747a | no | no  | no  | serious     |
| 8747b | no | no  | no  | serious     |
| 8769b |    |     |     |             |
| 8770b | no | no  | no  | serious     |
| 8784a | no | yes | yes | serious     |
| 8790a | no | no  | no  | serious     |
| 8815a | no | no  | no  | serious     |
| 8817a | no | yes | yes | not serious |
| 8817d | no | no  | yes | not serious |
| 8817e | no | no  | yes | not serious |
| 8826a | no | no  | yes | not serious |
| 8829a | no | no  | yes | not serious |
| 8850a |    |     |     |             |
| 8867  |    |     |     |             |
| 8884a | no | no  | yes | not serious |
| 8916a | no | no  | yes | not serious |

|       |    |     |     |             |  |
|-------|----|-----|-----|-------------|--|
| 8916b | no | no  | yes | not serious |  |
| 8916c | no | no  | yes | not serious |  |
| 8918a | no | no  | no  | serious     |  |
| 8918n | no | no  | no  | serious     |  |
| 8922l | no | yes | no  | serious     |  |
| 8928  | no | no  | no  | serious     |  |
| 8931a | no | yes | yes | serious     |  |
| 8933a | no | no  | no  | serious     |  |

**Table S9 cont. Publication bias: domain 5 for downgrading**

| Estimate ID | High number of small studies | Percentage of included trials with conflicts of interest | Funnel plot reported                                  | Visual evidence of publication bias | Statistical evidence of publication bias | RCTs of new therapy and unrobust search | The review searched for and present findings from unpublished studies that showed different results                               | Decision: <i>undetected, strongly suspected, very strongly suspected</i> | Publication bias notes                                                                                                                                  |
|-------------|------------------------------|----------------------------------------------------------|-------------------------------------------------------|-------------------------------------|------------------------------------------|-----------------------------------------|-----------------------------------------------------------------------------------------------------------------------------------|--------------------------------------------------------------------------|---------------------------------------------------------------------------------------------------------------------------------------------------------|
| 100c        | no                           | unclear                                                  | no                                                    | NR                                  | NR                                       | no                                      | no                                                                                                                                | undetected                                                               |                                                                                                                                                         |
| 593         | yes                          | 100%                                                     | no                                                    | NR                                  | NR                                       | no                                      | no                                                                                                                                | strongly suspected                                                       |                                                                                                                                                         |
| 1021        | yes                          | unclear                                                  | no                                                    | no                                  | NR                                       | no                                      | no                                                                                                                                | undetected                                                               |                                                                                                                                                         |
| 1164        | yes                          | unclear                                                  | no                                                    | NR                                  | NR                                       | no                                      | no                                                                                                                                | undetected                                                               |                                                                                                                                                         |
| 1264        | yes                          | unclear                                                  | no                                                    | NR                                  | NR                                       | no                                      | no                                                                                                                                | undetected                                                               |                                                                                                                                                         |
| 1438a       | no                           | 100%                                                     | no                                                    | NR                                  | NR                                       | no                                      | no                                                                                                                                | undetected                                                               |                                                                                                                                                         |
| 1606a       | no                           | unclear                                                  | no (only two studies so formal analysis not possible) | NR                                  | NR                                       | no                                      | no                                                                                                                                | undetected                                                               |                                                                                                                                                         |
| 1629a       | no                           | unclear                                                  | no                                                    | NR                                  | NR                                       | no                                      | no                                                                                                                                | undetected                                                               |                                                                                                                                                         |
| 1653a       | unclear                      | unclear                                                  | no                                                    | NR                                  | NR                                       | no                                      | no (included some unpublished data however, it is unclear if more unpublished data were withheld by participating drug companies) | undetected                                                               |                                                                                                                                                         |
| 1752a       | no                           | unclear                                                  | yes                                                   | no                                  | no                                       | no                                      | no                                                                                                                                | undetected                                                               |                                                                                                                                                         |
| 2159        | yes                          | unclear                                                  | no                                                    | NR                                  | NR                                       | no                                      | no                                                                                                                                | undetected                                                               |                                                                                                                                                         |
| 2599a       | yes                          | unclear                                                  | yes                                                   | no                                  | NR                                       | no                                      | no                                                                                                                                | undetected                                                               | asymmetrical appearance to the funnel plot but only 4 studies included so difficult to make a judgement                                                 |
| 2640b       | no                           | 100%                                                     | no                                                    | NR                                  | NR                                       | no                                      | no                                                                                                                                | strongly suspected                                                       | FDA trial reports utilised                                                                                                                              |
| 2933a       | no                           | unclear                                                  | no                                                    | NR                                  | NR                                       | no                                      | no                                                                                                                                | undetected                                                               |                                                                                                                                                         |
| 3275d       | no                           | 100%                                                     | no                                                    | NR                                  | NR                                       | no                                      | no                                                                                                                                | strongly suspected                                                       |                                                                                                                                                         |
| 3275e       | no                           | 100%                                                     | no                                                    | NR                                  | NR                                       | no                                      | no                                                                                                                                | undetected                                                               |                                                                                                                                                         |
| 3275l       | no                           | 100%                                                     | no                                                    | NR                                  | NR                                       | no                                      | no                                                                                                                                | undetected                                                               |                                                                                                                                                         |
| 3415        | no                           | unclear                                                  | no                                                    | NR                                  | NR                                       | no                                      | no                                                                                                                                | undetected                                                               |                                                                                                                                                         |
| 3639f       | no                           | 100%                                                     | no                                                    | NR                                  | NR                                       | no                                      | no                                                                                                                                | undetected                                                               |                                                                                                                                                         |
| 3640b       | no                           | 100%                                                     | no                                                    | NR                                  | NR                                       | no                                      | no                                                                                                                                | strongly suspected                                                       | In addition to all trials being industry funded, the review authors had potential conflicts of interest with companies that funded some of the studies. |
| 3640d       | no                           | 100%                                                     | no                                                    | NR                                  | NR                                       | no                                      | no                                                                                                                                | strongly suspected                                                       | In addition to all trials being industry funded, the review authors had potential conflicts of interest with companies that funded some of the studies. |
| 3657        | no                           | 0%                                                       | no                                                    | NR                                  | NR                                       | no                                      | no                                                                                                                                | undetected                                                               |                                                                                                                                                         |
| 3781d       | no                           | unclear                                                  | no                                                    | no                                  | no                                       | no                                      | no                                                                                                                                | undetected                                                               |                                                                                                                                                         |
| 4002h       | yes                          | 0                                                        | no                                                    | NR                                  | NR                                       | no                                      | no                                                                                                                                | undetected                                                               |                                                                                                                                                         |
| 4003a       |                              |                                                          |                                                       |                                     |                                          |                                         |                                                                                                                                   |                                                                          |                                                                                                                                                         |
| 4003e       | no                           | 100%                                                     | no                                                    | NR                                  | NR                                       | no                                      | no                                                                                                                                | undetected                                                               |                                                                                                                                                         |
| 4004o       | no                           | 100%                                                     | no                                                    | NR                                  | NR                                       | no                                      | no                                                                                                                                | undetected                                                               |                                                                                                                                                         |



|       |     |         |     |                                                                                |    |    |    |                    |                                                                  |
|-------|-----|---------|-----|--------------------------------------------------------------------------------|----|----|----|--------------------|------------------------------------------------------------------|
| 4004r | no  | 100%    | no  | NR                                                                             | NR | no | no | undetected         |                                                                  |
| 4004y | no  | 80%     | no  | NR                                                                             | NR | no | no | undetected         | Outcome under-reported across studies of Budesonide vs. control. |
| 4004z | no  | 100%    | no  | NR                                                                             | NR | no | no | undetected         |                                                                  |
| 4065a | yes | unclear | no  | NR                                                                             | NR | no | no | undetected         |                                                                  |
| 4067b | yes | unclear | no  | NR                                                                             | NR | no | no | undetected         |                                                                  |
| 4123b | no  | 0       | no  | NR                                                                             | NR | no | no | undetected         |                                                                  |
| 4123i | no  | 0       | no  | NR                                                                             | NR | no | no | undetected         |                                                                  |
| 4206a | no  |         | no  | NR                                                                             | NR | no | no | undetected         |                                                                  |
| 4206c | no  |         | no  | NR                                                                             | NR | no | no | undetected         |                                                                  |
| 4260  | no  | 0       | no  | NR                                                                             | NR | no | no | undetected         |                                                                  |
| 4508a |     |         |     |                                                                                |    |    |    |                    |                                                                  |
| 4615d | yes | unclear | no  | NR                                                                             | no | no | no | undetected         |                                                                  |
| 4615e | yes | unclear | no  | NR                                                                             | no | no | no | undetected         |                                                                  |
| 4629a | no  | unclear | yes | no                                                                             | no | no | no | undetected         |                                                                  |
| 4812a | yes | unclear | no  | NR                                                                             | NR | no | no | undetected         |                                                                  |
| 4838a | no  | unclear | no  | no                                                                             | no | no | no | undetected         |                                                                  |
| 4838b | no  | unclear | no  | no                                                                             | no | no | no | undetected         |                                                                  |
| 4844  | yes | unclear | no  | NR                                                                             | NR | no | no | undetected         |                                                                  |
| 5371  | yes | unclear | no  | NR                                                                             | NR | no | no | undetected         |                                                                  |
| 5533g | no  | 100%    | no  | NR                                                                             | NR | no | no | undetected         |                                                                  |
| 5606  | yes | 44%     | no  | NR                                                                             | NR | no | no | strongly suspected |                                                                  |
| 6442a |     |         |     |                                                                                |    |    |    |                    |                                                                  |
| 6564a | yes | unclear | no  | NR                                                                             | no | no | no | undetected         |                                                                  |
| 6568a | yes | unclear | no  | NR                                                                             | no | no | no | undetected         |                                                                  |
| 6670  | no  | unclear | no  | NR                                                                             | NR | no | no | undetected         |                                                                  |
| 6677  | yes | unclear | no  | NR                                                                             | NR | no | no | strongly suspected |                                                                  |
| 6746b | no  | unclear | no  | NR                                                                             | NR | no | no | undetected         |                                                                  |
| 6797a | no  | unclear | no  | NR                                                                             | NR | no | no | undetected         |                                                                  |
| 6797b | no  | unclear | no  | NR                                                                             | NR | no | no | undetected         |                                                                  |
| 6797d | no  | unclear | no  | NR                                                                             | NR | no | no | undetected         |                                                                  |
| 6806f | no  | unclear | no  | no (but there was a funnel plot with evidence of publication bias for relapse) | no | no | no | undetected         |                                                                  |
| 7029b | yes | unclear | yes | no                                                                             | NR | no | no | undetected         |                                                                  |
| 7484a | yes | unclear | no  | NR                                                                             | NR | no | no | undetected         |                                                                  |
| 7504  | no  | unclear | no  | NR                                                                             | NR | no | no | undetected         |                                                                  |
| 8511a | no  | unclear | no  | NR                                                                             | NR | no | no | undetected         |                                                                  |
| 8604b | yes | unclear | no  | NR                                                                             | NR | no | no | undetected         |                                                                  |
| 8604f | yes | unclear | no  | NR                                                                             | NR | no | no | undetected         |                                                                  |
| 8692e | no  | 100%    | no  | NR                                                                             | NR | no | no | undetected         |                                                                  |
| 8729a | yes | unclear | no  | NR                                                                             | no | no | no | undetected         |                                                                  |
| 8742a | no  | unclear | yes | no                                                                             | no | no | no | undetected         |                                                                  |
| 8744d | no  | 100%    | no  | NR                                                                             | NR | no | no | undetected         |                                                                  |
| 8747a | no  | unclear | no  | NR                                                                             | NR | no | no | undetected         |                                                                  |

|       |     |         |     |     |     |    |    |                    |  |
|-------|-----|---------|-----|-----|-----|----|----|--------------------|--|
| 8747b | no  | unclear | no  | NR  | NR  | no | no | undetected         |  |
| 8769b |     |         |     |     |     |    |    |                    |  |
| 8770b | yes | 14%     | no  | NR  | NR  | no | no | undetected         |  |
| 8784a | yes | 0       | no  | NR  | NR  | no | no | undetected         |  |
| 8790a | no  | unclear | no  | NR  | NR  | no | no | undetected         |  |
| 8815a | yes | unclear | no  | NR  | NR  | no | no | undetected         |  |
| 8817a | no  | unclear | yes | yes | yes | no | no | strongly suspected |  |
| 8817d | no  | unclear | yes | yes | yes | no | no | strongly suspected |  |
| 8817e | no  | unclear | yes | yes | yes | no | no | strongly suspected |  |
| 8826a | yes | unclear | no  | NR  | NR  | no | no | undetected         |  |
| 8829a | no  | unclear | no  | NR  | NR  | no | no | undetected         |  |
| 8850a |     |         |     |     |     |    |    |                    |  |
| 8867  |     |         |     |     |     |    |    |                    |  |
| 8884a | yes | unclear | no  | NR  | NR  | no | no | undetected         |  |
| 8916a | no  | unclear | no  | NR  | NR  | no | no | undetected         |  |
| 8916b | no  | unclear | no  | NR  | NR  | no | no | undetected         |  |
| 8916c | no  | unclear | no  | NR  | NR  | no | no | undetected         |  |
| 8918a | yes | unclear | no  | NR  | NR  | no | no | undetected         |  |
| 8918n | yes | unclear | no  | NR  | NR  | no | no | undetected         |  |
| 8922l | yes | unclear | no  | NR  | NR  | no | no | undetected         |  |
| 8928  | yes | unclear | no  | NR  | NR  | no | no | strongly suspected |  |
| 8931a | no  | unclear | no  | NR  | no  | no | no | undetected         |  |
| 8933a | no  | unclear | no  | NR  | NR  | no | no | undetected         |  |

**Table S10. GRADED estimates showing an increase in admissions**

| Author, Year, Estimate ID                                                 | Population description                                                    | Intervention (Event rate) <sup>a</sup>                                | Comparison (Event rate) <sup>a</sup>                          | Patients (RCTs) | Patient age <sup>b</sup> | Outcome (follow-up) <sup>c</sup>               | Effect (95% CI) <sup>d,e</sup><br>NNT (95% CI) <sup>d,f</sup><br>I <sup>2</sup> % | Quality of evidence (GRADE) | Notes                                                           |
|---------------------------------------------------------------------------|---------------------------------------------------------------------------|-----------------------------------------------------------------------|---------------------------------------------------------------|-----------------|--------------------------|------------------------------------------------|-----------------------------------------------------------------------------------|-----------------------------|-----------------------------------------------------------------|
| <b>Disease of the circulatory system</b>                                  |                                                                           |                                                                       |                                                               |                 |                          |                                                |                                                                                   |                             |                                                                 |
| <b>Atrial fibrillation</b>                                                |                                                                           |                                                                       |                                                               |                 |                          |                                                |                                                                                   |                             |                                                                 |
| Cordina, 2005, 1606a                                                      | Paroxysmal, sustained, or permanent atrial fibrillation or atrial flutter | Rhythm medications (antiarrhythmic drugs) (49 per 100)                | Rate control medications (rate control drugs) (42 per 100)    | 4312 (2)        | 65 ±6                    | Hospital admission (27 ±21 months)             | RR: 1.16 (1.11 to 1.22)<br>NNT: 15 (11 to 22)<br>I <sup>2</sup> : 97%             | Low                         | Summary estimate                                                |
| <b>Heart Failure</b>                                                      |                                                                           |                                                                       |                                                               |                 |                          |                                                |                                                                                   |                             |                                                                 |
| Heran, 2012, 3275e                                                        | Heart failure, any ejection fraction                                      | Angiotensin II receptor blocker (39 per 100)                          | Placebo (37 per 100)                                          | 9449 (4)        | 68 ±3                    | Hospital admission (31 ±20 months)             | RR: 1.06 (1.01 to 1.12)<br>NNT: 45 (23 to 272)<br>I <sup>2</sup> : 0%             | Very low                    | Summary estimate                                                |
| <b>Diseases of the respiratory system</b>                                 |                                                                           |                                                                       |                                                               |                 |                          |                                                |                                                                                   |                             |                                                                 |
| <b>Other chronic obstructive pulmonary disease</b>                        |                                                                           |                                                                       |                                                               |                 |                          |                                                |                                                                                   |                             |                                                                 |
| Kew, 2014, 4004o                                                          | Moderate to severe chronic obstructive pulmonary disease                  | Budesonide (4.5 per 100)                                              | Placebo (1.3 per 100)                                         | 867 (3)         | 63 ±0.2                  | Admission for pneumonia (Range 6 to 48 months) | OR: 3.47 (1.11 to 10.83)<br>NNT: 31 (9 to 685)<br>I <sup>2</sup> : 0%             | Low                         | Sub-group by comparison: Placebo                                |
| Kew, 2014, 4004r                                                          | Moderate to severe chronic obstructive pulmonary disease                  | Budesonide (with or without formoterol) (1.4 per 100)                 | Controls (placebo or formoterol) (0.7 per 100)                | 4659 (6)        | 64 ±1                    | Admission for pneumonia (8 ±4 months)          | OR: 2.02 (1.15 to 3.57)<br>NNT: 141 (57 to 954)<br>I <sup>2</sup> : 4%            | Low                         | Sub-group by intervention: Budesonide 640 mcg (320 mcg bid)     |
| Kew, 2014, 4004y                                                          | Moderate to severe chronic obstructive pulmonary disease                  | Budesonide (with or without formoterol) (1 per 100)                   | Controls (placebo or formoterol) (0.3 per 100)                | 3515 (4)        | 65 ±2                    | Admission for pneumonia (7 ±3 months)          | OR: 3.28 (1.22 to 8.81)<br>NNT: 133 (40 to 1369)<br>I <sup>2</sup> : 0%           | Low                         | Sub-group by study quality: Trials at high risk of bias removed |
| Kew, 2014, 4004z                                                          | Moderate to severe chronic obstructive pulmonary disease                  | Fluticasone (with or without long acting beta2-agonist) (1.4 per 100) | Controls (placebo or long acting beta2-agonist) (0.8 per 100) | 16338 (15)      | 64 ±1                    | Admission for pneumonia (12 ±11 months)        | OR: 1.82 (1.52 to 2.19)<br>NNT: 164 (114 to 259)<br>I <sup>2</sup> : 0%           | High                        | Sub-group by study quality: Trials at high risk of bias removed |
| <b>Factors influencing health status and contact with health services</b> |                                                                           |                                                                       |                                                               |                 |                          |                                                |                                                                                   |                             |                                                                 |
| <b>Patients presenting to primary care</b>                                |                                                                           |                                                                       |                                                               |                 |                          |                                                |                                                                                   |                             |                                                                 |
| Laurant, 2005, 9181a                                                      | Patients presenting to primary care                                       | Nurse-led primary care (12 per 100)                                   | Physician-led primary care (11 per 100)                       | 15860 (3)       | 45                       | Hospital admission (6 ±4 months)               | RR: 1.17 (1.04 to 1.31)<br>NNT: 56 (31 to 238)<br>I <sup>2</sup> : 40%            | Moderate                    | Summary estimate                                                |
| <b>Special screening examination for neoplasms</b>                        |                                                                           |                                                                       |                                                               |                 |                          |                                                |                                                                                   |                             |                                                                 |

|                                                                                                                                                                                                                                                                                                                                                  |                                                                                                                                                              |                                                                                                                                                                                                                                                                                                                                                                                                                             |                                                                |             |                |                                         |                                                                       |          |                  |
|--------------------------------------------------------------------------------------------------------------------------------------------------------------------------------------------------------------------------------------------------------------------------------------------------------------------------------------------------|--------------------------------------------------------------------------------------------------------------------------------------------------------------|-----------------------------------------------------------------------------------------------------------------------------------------------------------------------------------------------------------------------------------------------------------------------------------------------------------------------------------------------------------------------------------------------------------------------------|----------------------------------------------------------------|-------------|----------------|-----------------------------------------|-----------------------------------------------------------------------|----------|------------------|
| Yang, 2015, 8918n                                                                                                                                                                                                                                                                                                                                | Patients undergoing prostate biopsy                                                                                                                          | Single drug (3 per 100)                                                                                                                                                                                                                                                                                                                                                                                                     | Combined drugs (0.5 per 100)                                   | 659 (3)     | Unclear        | Hospital admission (0.55 ± 0.66 months) | RR: 5.91 (2.2 to 15.87)<br>NNT: 38 (13 to 157)<br>I <sup>2</sup> : 0% | Low      | Summary estimate |
| <b>Mental and behavioural disorders</b>                                                                                                                                                                                                                                                                                                          |                                                                                                                                                              |                                                                                                                                                                                                                                                                                                                                                                                                                             |                                                                |             |                |                                         |                                                                       |          |                  |
| <b>Schizophrenia and other types of schizophrenia-like psychoses (Acute and transient psychotic disorders; Bipolar affective disorder; Induced delusional disorder; Other nonorganic psychotic disorders; Persistent delusional disorders; Schizoaffective disorders; Schizophrenia; Schizotypal disorder; Unspecified nonorganic psychosis)</b> |                                                                                                                                                              |                                                                                                                                                                                                                                                                                                                                                                                                                             |                                                                |             |                |                                         |                                                                       |          |                  |
| Marshall, 1998, 4966a                                                                                                                                                                                                                                                                                                                            | Schizophrenia and schizophrenia-like disorders, bipolar disorder or depression with psychotic features                                                       | Case management (34 per 100)                                                                                                                                                                                                                                                                                                                                                                                                | Standard care (22 per 100)                                     | 1300 (6)    | 45 ±5          | Hospital admission (13 ±5 months)       | OR: 1.84 (1.43 to 2.37)<br>NNT: 8 (6 to 15)<br>I <sup>2</sup> : 61%   | Low      | Summary estimate |
| Sampson, 2013, 6806f                                                                                                                                                                                                                                                                                                                             | Schizophrenia and other types of schizophrenia-like psychoses                                                                                                | Intermittent drug technique (specific drug) (38 per 100)                                                                                                                                                                                                                                                                                                                                                                    | Maintenance therapy (24 per 100)                               | 661 (6)     | 35 ±5          | Hospital admission (21 ±7 months)       | RR: 1.58 (1.28 to 1.97)<br>NNT: 7 (4 to 15)<br>I <sup>2</sup> : 19%   | Low      | Summary estimate |
| <b>Severe mental illnesses and disordered personality</b>                                                                                                                                                                                                                                                                                        |                                                                                                                                                              |                                                                                                                                                                                                                                                                                                                                                                                                                             |                                                                |             |                |                                         |                                                                       |          |                  |
| Buckley, 2015, 8733c                                                                                                                                                                                                                                                                                                                             | Schizophrenia and other types of schizophrenia-like psychoses                                                                                                | Supportive therapy: interventions provided by a single person with the main purpose of maintaining current functioning or assisting pre-existing coping abilities. A number of common therapies were excluded as they are designed to teach new skills or change pre-existing skills: cognitive behavioural therapy, social skills training, psycho-education, compliance therapy and problem-solving therapy. (21 per 100) | Any other psychological or psychosocial treatment (12 per 100) | 306 (4)     | Range 18 to 65 | Hospital admission (34 ±50 months)      | RR: 1.82 (1.11 to 2.99)<br>NNT: 11 (79 to 4)<br>I <sup>2</sup> : 13%  | Very low | Summary estimate |
| <b>Mixed population</b>                                                                                                                                                                                                                                                                                                                          |                                                                                                                                                              |                                                                                                                                                                                                                                                                                                                                                                                                                             |                                                                |             |                |                                         |                                                                       |          |                  |
| Baigent, 2013, 1653a                                                                                                                                                                                                                                                                                                                             | Patients indicated for treatment with non-steroidal anti-inflammatory drugs; Rheumatoid arthritis; Osteoarthritis; Colorectal adenomata; Alzheimer's disease | Cox-2-inhibitors (59 per 100)                                                                                                                                                                                                                                                                                                                                                                                               | Placebo (26 per 100)                                           | 88367 (184) | Unclear        | Admission for heart failure (Unclear)   | rR: 2.28 (1.62 to 3.2)<br>NNT: 3 (2 to 6)<br>I <sup>2</sup> : Unclear | Moderate | Summary estimate |
| <b>Neoplasms</b>                                                                                                                                                                                                                                                                                                                                 |                                                                                                                                                              |                                                                                                                                                                                                                                                                                                                                                                                                                             |                                                                |             |                |                                         |                                                                       |          |                  |
| Gupta, 2014, 8688a                                                                                                                                                                                                                                                                                                                               | Symptomatic uterine fibroids                                                                                                                                 | Uterine artery embolization (27 per 100)                                                                                                                                                                                                                                                                                                                                                                                    | Myomectomy (13 per 100)                                        | 278 (2)     | 39 ±9          | Readmission (9 ±4 months)               | RD: 0.14 (0.05 to 0.22)<br>NNT: 7 (5 to 20)<br>I <sup>2</sup> : 86%   | Low      | Summary estimate |

<sup>a</sup>Median hospitalisation event rate observed across the trials contributing to the pooled estimate. <sup>b</sup>Means and standard deviations for patient ages in years, unless otherwise specified. Mean of means and median ages in trials contributing to the pooled estimate. Not all included trials reported age in a form that could be averaged. <sup>c</sup>Means and standard deviations for length of follow-up across trials, unless otherwise specified. Mean of means, medians, and total study durations reported in trials contributing to the pooled estimate. Not all included trials reported follow-up in a form that could be averaged. <sup>d</sup>RR= risk ratio; OR=odds ratio. <sup>e</sup>CI=confidence interval. <sup>f</sup>NNT= Number needed to treat to benefit by avoiding one hospital admission. <sup>g</sup>As indicated in Table 2 : the symbol (+) denotes when review conclusions indicated a favourable overall balance of benefit to harm or the authors recommend use of intervention; the symbol (-) denotes when review conclusions indicated that there was not a favourable overall balance of benefit to harm or the authors recommended not to use the intervention; and the symbol (?) denotes when review conclusions indicated that the overall balance of benefit to harm was unclear, the authors did not comment on the overall balance of benefit to harm, or the authors indicated that more research was required before a recommendation regarding use of the intervention could be made.
